# Supplementary material for: TET2 binding to enhancers facilitates transcription factor recruitment in hematopoietic cells
Source: HighWire-hosted journal article supplement (doi:10.1101/gr.239277.118), 2019-02-22
Supplement: Supplemental_Table_S1.xlsx [file Supplemental_Table_S1.xlsx]

## Sheet: Supplemental Table S1
Supplemental Table S1: Supplemental table with TF clustering by DNA-binding motif similarities

## Sheet: clusters_motif_names
cluster_1	CEBPZ_MOUSE.H10MO.D	YBOX1_MOUSE.H10MO.D	FOXI1_MOUSE.H10MO.B	FOS_MOUSE.H10MO.A	PBX3_MOUSE.H10MO.A	NFYC_MOUSE.H10MO.B	NFYA_MOUSE.H10MO.S	NFYB_MOUSE.H10MO.A	HBP1_MOUSE.H10MO.D	TLX1_MOUSE.H10MO.S
cluster_2	NDF1_MOUSE.H10MO.C	TAL1_MOUSE.H10MO.S	ATOH1_MOUSE.H10MO.C	TFE2_MOUSE.H10MO.S	ZBT18_MOUSE.H10MO.D	MYOD1_MOUSE.H10MO.C	HTF4_MOUSE.H10MO.C	MYOG_MOUSE.H10MO.C
cluster_3	GATA5_MOUSE.H10MO.D	GATA1_MOUSE.H10MO.A	GATA2_MOUSE.H10MO.A	GATA6_MOUSE.H10MO.B	GATA3_MOUSE.H10MO.C	GATA4_MOUSE.H10MO.B	TAL1_MOUSE.H10MO.A	EVI1_MOUSE.H10MO.B
cluster_4	AP2D_MOUSE.H10MO.D	AP2B_MOUSE.H10MO.B	AP2A_MOUSE.H10MO.A	AP2C_MOUSE.H10MO.A	MBD2_MOUSE.H10MO.B	MECP2_MOUSE.H10MO.C
cluster_5	HNF1A_MOUSE.H10MO.A	HNF1B_MOUSE.H10MO.B	OTX2_MOUSE.H10MO.C	CRX_MOUSE.H10MO.A	PRRX1_MOUSE.H10MO.D	PITX2_MOUSE.H10MO.D	OTX1_MOUSE.H10MO.D	CRX_MOUSE.H10MO.S	PO4F2_MOUSE.H10MO.D	VSX2_MOUSE.H10MO.D	BARX2_MOUSE.H10MO.D	ZFHX3_MOUSE.H10MO.D	PROP1_MOUSE.H10MO.D	LHX2_MOUSE.H10MO.D	LHX3_MOUSE.H10MO.C	ALX1_MOUSE.H10MO.B	ARI3A_MOUSE.H10MO.S	ISL1_MOUSE.H10MO.D	NANOG_MOUSE.H10MO.S	HMGA1_MOUSE.H10MO.D	EVX1MET2	DLX3_MOUSE.H10MO.C	NOBOX_MOUSE.H10MO.C	PDX1_MOUSE.H10MO.C	DLX2_MOUSE.H10MO.D	EVX1HT	EVX1MET1	PRRX2_MOUSE.H10MO.C	HXD4_MOUSE.H10MO.D	MSX2_MOUSE.H10MO.D
cluster_6	PPARG_MOUSE.H10MO.A	NR2C1_MOUSE.H10MO.C	HNF4A_MOUSE.H10MO.A	HNF4G_MOUSE.H10MO.C	COT2_MOUSE.H10MO.S	COT1_MOUSE.H10MO.S	PPARD_MOUSE.H10MO.D	NR2C2_MOUSE.H10MO.A	PPARA_MOUSE.H10MO.C	NR1H2_MOUSE.H10MO.D	NR2F6_MOUSE.H10MO.D	NR1D1_MOUSE.H10MO.D	RXRA_MOUSE.H10MO.C	E4F1_MOUSE.H10MO.D	CREM_MOUSE.H10MO.C	ATF1_MOUSE.H10MO.B	ATF3_MOUSE.H10MO.A	ATF2_MOUSE.H10MO.B	CREB1_MOUSE.H10MO.B	RORA_MOUSE.H10MO.B	RORG_MOUSE.H10MO.C	THB_MOUSE.H10MO.S	RXRB_MOUSE.H10MO.C	THA_MOUSE.H10MO.S	NR4A1_MOUSE.H10MO.C	NR4A2_MOUSE.H10MO.C	PPARG_MOUSE.H10MO.S	COT1_MOUSE.H10MO.B	NR4A3_MOUSE.H10MO.D	COT2_MOUSE.H10MO.B	NR5A2_MOUSE.H10MO.A	STF1_MOUSE.H10MO.B	ERR3_MOUSE.H10MO.B	ERR1_MOUSE.H10MO.A	ERR2_MOUSE.H10MO.B	ESR2_MOUSE.H10MO.S	NR1I2_MOUSE.H10MO.S	NR1I3_MOUSE.H10MO.S	VDR_MOUSE.H10MO.S	RARG_MOUSE.H10MO.S	PPARA_MOUSE.H10MO.S	RARA_MOUSE.H10MO.S	VDR_MOUSE.H10MO.C	ESR1_MOUSE.H10MO.B	ESR2_MOUSE.H10MO.B	NR6A1_MOUSE.H10MO.B	RXRG_MOUSE.H10MO.C	NR1H4_MOUSE.H10MO.C	RARB_MOUSE.H10MO.D
cluster_7	TBX20_MOUSE.H10MO.C	PAX5_MOUSE.H10MO.S	MAFB_MOUSE.H10MO.D	MAF_MOUSE.H10MO.B	BATF_MOUSE.H10MO.B	JUND_MOUSE.H10MO.A	FOSL1_MOUSE.H10MO.C	JUN_MOUSE.H10MO.A	SMRC1_MOUSE.H10MO.B	FOSL2_MOUSE.H10MO.A	JUNB_MOUSE.H10MO.B	FOSB_MOUSE.H10MO.C	MAFK_MOUSE.H10MO.S	NF2L2_MOUSE.H10MO.D	BACH1_MOUSE.H10MO.C	NFE2_MOUSE.H10MO.A	TGIF1_MOUSE.H10MO.S	PAX2_MOUSE.H10MO.S	MAFG_MOUSE.H10MO.D	NF2L1_MOUSE.H10MO.C
cluster_8	CUX1_MOUSE.H10MO.C	HXC8_MOUSE.H10MO.D	PKNX1_MOUSE.H10MO.D	PBX1_MOUSE.H10MO.B	PBX2_MOUSE.H10MO.C	PO6F1_MOUSE.H10MO.D	HXA10_MOUSE.H10MO.C	HXB6_MOUSE.H10MO.D	HXA1_MOUSE.H10MO.C	HXB1_MOUSE.H10MO.D	PO3F2_MOUSE.H10MO.D	HXA5_MOUSE.H10MO.D	HXB7_MOUSE.H10MO.C	HXB8_MOUSE.H10MO.C	HXD13_MOUSE.H10MO.D	CDX4MET1	EVX2_MOUSE.H10MO.C	CDX4HT	CDX4MET2	CDX4HOXC9_MOUSE.H10MO.A	EVX1HOXA9_MOUSE.H10MO.C	CDX1_MOUSE.H10MO.C	CDX2_MOUSE.H10MO.C	HXA13_MOUSE.H10MO.C	HXD9_MOUSE.H10MO.D
cluster_9	GCR_MOUSE.H10MO.S	PRGR_MOUSE.H10MO.S	TCF7_MOUSE.H10MO.C	TF7L2_MOUSE.H10MO.A	SOX4_MOUSE.H10MO.C	SOX3_MOUSE.H10MO.C	SOX9_MOUSE.H10MO.B	SRY_MOUSE.H10MO.B	SOX13_MOUSE.H10MO.D	SOX5_MOUSE.H10MO.C	SOX10_MOUSE.H10MO.D	LEF1_MOUSE.H10MO.C	SOX15_MOUSE.H10MO.D
cluster_10	IKZF1_MOUSE.H10MO.C	SUH_MOUSE.H10MO.C	KLF8_MOUSE.H10MO.C	EGR3_MOUSE.H10MO.D	EGR1_MOUSE.H10MO.A	EGR2_MOUSE.H10MO.C	ARNT2_MOUSE.H10MO.D	NR0B1_MOUSE.H10MO.D	KLF3_MOUSE.H10MO.D	KLF1_MOUSE.H10MO.C	KLF4_MOUSE.H10MO.C	KLF6_MOUSE.H10MO.D	WT1_MOUSE.H10MO.D	SP1_MOUSE.H10MO.S	EGR4_MOUSE.H10MO.D	PLAG1_MOUSE.H10MO.S	GLI2_MOUSE.H10MO.B	GLI1_MOUSE.H10MO.C	GLI3_MOUSE.H10MO.B	GLIS3_MOUSE.H10MO.D	ZIC3_MOUSE.H10MO.C	ZIC1_MOUSE.H10MO.B	ZIC2_MOUSE.H10MO.C
cluster_11	PO3F1_MOUSE.H10MO.C	NANOG_MOUSE.H10MO.A	PO5F1_MOUSE.H10MO.A	SOX2_MOUSE.H10MO.A	PIT1_MOUSE.H10MO.C	PO2F1_MOUSE.H10MO.B	PO2F2_MOUSE.H10MO.B
cluster_12	MXI1_MOUSE.H10MO.C	MYC_MOUSE.H10MO.A	AHR_MOUSE.H10MO.B	ARNT_MOUSE.H10MO.B	MYCN_MOUSE.H10MO.B	BHE40_MOUSE.H10MO.B	TFEB_MOUSE.H10MO.C	TFE3_MOUSE.H10MO.C	USF1_MOUSE.H10MO.A	MAX_MOUSE.H10MO.A	MITF_MOUSE.H10MO.C	HIF1A_MOUSE.H10MO.A	HES1_MOUSE.H10MO.D	BMAL1_MOUSE.H10MO.C	USF2_MOUSE.H10MO.A	TBX5_MOUSE.H10MO.D	TWST1_MOUSE.H10MO.D	ITF2_MOUSE.H10MO.B	MYF6_MOUSE.H10MO.C	SNAI1_MOUSE.H10MO.C	SNAI2_MOUSE.H10MO.C	ZEB1_MOUSE.H10MO.D
cluster_13	NFAC1_MOUSE.H10MO.A	NFAC4_MOUSE.H10MO.C	NFAC2_MOUSE.H10MO.B	NFAC3_MOUSE.H10MO.B	NFAC1_MOUSE.H10MO.S	NFAT5_MOUSE.H10MO.D	NFKB2_MOUSE.H10MO.D	ZEP1_MOUSE.H10MO.D	NFKB1_MOUSE.H10MO.B	TF65_MOUSE.H10MO.S	RELB_MOUSE.H10MO.C	REL_MOUSE.H10MO.C
cluster_14	STAT3_MOUSE.H10MO.B	ELF2_MOUSE.H10MO.C	ETV5_MOUSE.H10MO.D	GABPA_MOUSE.H10MO.A	FLI1_MOUSE.H10MO.A	EHF_MOUSE.H10MO.A	ELF5_MOUSE.H10MO.D	ELK4_MOUSE.H10MO.B	ELK3_MOUSE.H10MO.D	ERG_MOUSE.H10MO.A	ETV4_MOUSE.H10MO.B	ELF1_MOUSE.H10MO.B	ELK1_MOUSE.H10MO.B	ETS1_MOUSE.H10MO.B	ETS2_MOUSE.H10MO.C	GABP1_MOUSE.H10MO.C	FEV_MOUSE.H10MO.C
cluster_15	HSF1_MOUSE.H10MO.A	HSF2_MOUSE.H10MO.A
cluster_16	FOXM1_MOUSE.H10MO.D	FUBP1_MOUSE.H10MO.D	FOXJ3_MOUSE.H10MO.A	FOXJ3_MOUSE.H10MO.S	FOXC2_MOUSE.H10MO.D	FOXC1_MOUSE.H10MO.C	FOXD1_MOUSE.H10MO.D	FOXO1_MOUSE.H10MO.C	FOXO3_MOUSE.H10MO.B	FOXA3_MOUSE.H10MO.C	FOXA2_MOUSE.H10MO.B	FOXF2_MOUSE.H10MO.D	FOXA1_MOUSE.H10MO.B	FOXD3_MOUSE.H10MO.D	FOXF1_MOUSE.H10MO.D	FOXJ2_MOUSE.H10MO.C	FOXQ1_MOUSE.H10MO.C	FOXO4_MOUSE.H10MO.C	FOXP2_MOUSE.H10MO.A
cluster_17	E2F2_MOUSE.H10MO.B	E2F3_MOUSE.H10MO.B	E2F5_MOUSE.H10MO.B	E2F7_MOUSE.H10MO.D	TFDP1_MOUSE.H10MO.D	E2F1_MOUSE.H10MO.A	E2F4_MOUSE.H10MO.C	E2F6_MOUSE.H10MO.A
cluster_18	IRF4_MOUSE.H10MO.C	IRF3_MOUSE.H10MO.C	STAT1_MOUSE.H10MO.A	IRF7_MOUSE.H10MO.C	IRF1_MOUSE.H10MO.C	IRF9_MOUSE.H10MO.C	PRDM1_MOUSE.H10MO.A	STAT2_MOUSE.H10MO.B	IRF2_MOUSE.H10MO.C	IRF8_MOUSE.H10MO.D	ELF3_MOUSE.H10MO.D	SPI1_MOUSE.H10MO.A	SPIB_MOUSE.H10MO.B
cluster_19	MEIS2_MOUSE.H10MO.B	HXA9_MOUSE.H10MO.D	MEIS1_MOUSE.H10MO.C
cluster_20	NR1I2_MOUSE.H10MO.C	NR1I3_MOUSE.H10MO.C	THA_MOUSE.H10MO.C	THB_MOUSE.H10MO.C
cluster_21	SMAD1_MOUSE.H10MO.D	UBIP1_MOUSE.H10MO.D	HAND1_MOUSE.H10MO.D	SMAD2_MOUSE.H10MO.D	SMAD3_MOUSE.H10MO.C	SMAD4_MOUSE.H10MO.C
cluster_22	TEAD4_MOUSE.H10MO.D	TBP_MOUSE.H10MO.C	MEF2A_MOUSE.H10MO.B	MEF2C_MOUSE.H10MO.B	MEF2D_MOUSE.H10MO.C
cluster_23	CEBPE_MOUSE.H10MO.A	CEBPG_MOUSE.H10MO.C	HLF_MOUSE.H10MO.C	DBP_MOUSE.H10MO.B	CEBPD_MOUSE.H10MO.B	CEBPA_MOUSE.H10MO.B	CEBPB_MOUSE.H10MO.A	NFIL3_MOUSE.H10MO.C	TEF_MOUSE.H10MO.D
cluster_24	RUNX2_MOUSE.H10MO.B	PEBB_MOUSE.H10MO.C	RUNX1_MOUSE.H10MO.B
cluster_25	GFI1B_MOUSE.H10MO.C	GFI1_MOUSE.H10MO.C
cluster_26	KLF15_MOUSE.H10MO.D	SP4_MOUSE.H10MO.D	PURA_MOUSE.H10MO.D	SP2_MOUSE.H10MO.C	SP1_MOUSE.H10MO.A	SP3_MOUSE.H10MO.B	MAZ_MOUSE.H10MO.D	ZN148_MOUSE.H10MO.D
cluster_27	BCL6_MOUSE.H10MO.C	STAT4_MOUSE.H10MO.A	STA5A_MOUSE.H10MO.A	STA5B_MOUSE.H10MO.C
cluster_28	SRBP1_MOUSE.H10MO.B	SRBP2_MOUSE.H10MO.B
cluster_29	MCR_MOUSE.H10MO.D	PRGR_MOUSE.H10MO.C	GCR_MOUSE.H10MO.C	ANDR_MOUSE.H10MO.B
cluster_30	TEAD1_MOUSE.H10MO.D	TEAD3_MOUSE.H10MO.D
cluster_31	XBP1_MOUSE.H10MO.C	P63_MOUSE.H10MO.D	P73_MOUSE.H10MO.D
cluster_32	NKX22_MOUSE.H10MO.D	NKX31_MOUSE.H10MO.C	NKX21_MOUSE.H10MO.D	NKX28_MOUSE.H10MO.C	NKX25_MOUSE.H10MO.C	NKX32_MOUSE.H10MO.C
cluster_33	RARA_MOUSE.H10MO.C	RARG_MOUSE.H10MO.C
cluster_34	NFIA_MOUSE.H10MO.C	TLX1_MOUSE.H10MO.D
cluster_35	OLIG2_MOUSE.H10MO.B	TFE2_MOUSE.H10MO.A
cluster_36	RFX1_MOUSE.H10MO.C	RFX2_MOUSE.H10MO.C	RFX3_MOUSE.H10MO.B
cluster_37	HXC6_MOUSE.H10MO.D	NR2E3_MOUSE.H10MO.C
cluster_38	BHE41_MOUSE.H10MO.D	HESX1_MOUSE.H10MO.D	HEY2_MOUSE.H10MO.D
cluster_39	HNF6_MOUSE.H10MO.C	ONEC2_MOUSE.H10MO.D
cluster_40	KAISO_MOUSE.H10MO.B	STAT6_MOUSE.H10MO.C
cluster_41	BRCA1_MOUSE.H10MO.D	MYBB_MOUSE.H10MO.D	MYB_MOUSE.H10MO.C
cluster_42	MAFA_MOUSE.H10MO.D	MAFK_MOUSE.H10MO.A
cluster_43	PAX6_MOUSE.H10MO.D	PAX8_MOUSE.H10MO.D	PAX2_MOUSE.H10MO.D	PAX5_MOUSE.H10MO.D
cluster_44	TBX2_MOUSE.H10MO.D	BRAC_MOUSE.H10MO.D	TBX3_MOUSE.H10MO.D
cluster_45	PTF1A_MOUSE.H10MO.C
cluster_46	P53_MOUSE.H10MO.C
cluster_47	TF2L1_MOUSE.H10MO.C
cluster_48	MSX3_MOUSE.H10MO.D	ARI3A_MOUSE.H10MO.D
cluster_49	FOXP3_MOUSE.H10MO.D
cluster_50	HXD10_MOUSE.H10MO.D
cluster_51	COE1_MOUSE.H10MO.C
cluster_52	ZN423_MOUSE.H10MO.D
cluster_53	HIC1_MOUSE.H10MO.C	ZEP2_MOUSE.H10MO.D
cluster_54	INSM1_MOUSE.H10MO.C	TGIF1_MOUSE.H10MO.D
cluster_55	NFIA_MOUSE.H10MO.S	CXXC1_MOUSE.H10MO.D
cluster_56	SOX18_MOUSE.H10MO.D
cluster_57	TF65_MOUSE.H10MO.C
cluster_58	ZN143_MOUSE.H10MO.D
cluster_59	TFCP2_MOUSE.H10MO.D
cluster_60	IRF5_MOUSE.H10MO.D
cluster_61	NFYA_MOUSE.H10MO.D
cluster_62	DDIT3_MOUSE.H10MO.C
cluster_63	PRD14_MOUSE.H10MO.D	ZBTB6_MOUSE.H10MO.D
cluster_64	HMGA2_MOUSE.H10MO.D
cluster_65	PLAG1_MOUSE.H10MO.D
cluster_66	AIRE_MOUSE.H10MO.C
cluster_67	RUNX3_MOUSE.H10MO.B
cluster_68	HEN1_MOUSE.H10MO.C
cluster_69	GCM1_MOUSE.H10MO.D
cluster_70	TYY1_MOUSE.H10MO.A
cluster_71	HLTF_MOUSE.H10MO.D
cluster_72	MTF1_MOUSE.H10MO.C
cluster_73	MLXPL_MOUSE.H10MO.D
cluster_74	SPZ1_MOUSE.H10MO.D
cluster_75	EPAS1_MOUSE.H10MO.D
cluster_76	RREB1_MOUSE.H10MO.D
cluster_77	HXA7_MOUSE.H10MO.D
cluster_78	ZBT7A_MOUSE.H10MO.D
cluster_79	CTCF_MOUSE.H10MO.A
cluster_80	SRF_MOUSE.H10MO.A
cluster_81	OVOL1_MOUSE.H10MO.C
cluster_82	ARI5B_MOUSE.H10MO.C
cluster_83	SOX17_MOUSE.H10MO.D
cluster_84	HINFP_MOUSE.H10MO.C
cluster_85	NRF1_MOUSE.H10MO.A
cluster_86	ZFX_MOUSE.H10MO.C
cluster_87	CDC5L_MOUSE.H10MO.D
cluster_88	REST_MOUSE.H10MO.A
