# Supplementary material for: TET2 binding to enhancers facilitates transcription factor recruitment in hematopoietic cells
Source: HighWire-hosted journal article supplement (doi:10.1101/gr.239277.118), 2019-02-22
Supplement: Supplemental_Table_S2.xlsx [file Supplemental_Table_S2.xlsx]

## Sheet: Supplemental Table S2
Supplemental Table S2: Supplemental table with GSEA results showing list of Gene Ontology (GO) terms enriched in wildtype or Tet2 knockout MPP cells, respectively

## Sheet: GSEA_enriched WT MPP cells
NAME	GS<br> follow link to MSigDB	GS DETAILS	SIZE	ES	NES	NOM p-val	FDR q-val	FWER p-val	RANK AT MAX	LEADING EDGE
REACTOME_SRP_DEPENDENT_COTRANSLATIONAL_PROTEIN_TARGETING_TO_MEMBRANE	REACTOME_SRP_DEPENDENT_COTRANSLATIONAL_PROTEIN_TARGETING_TO_MEMBRANE	Details ...	103	0.771092	2.8285	0	0	0	3997	tags=79%, list=17%, signal=94%
REACTOME_TRANSLATION	REACTOME_TRANSLATION	Details ...	138	0.732972	2.81602	0	0	0	4263	tags=75%, list=18%, signal=91%
REACTOME_INFLUENZA_VIRAL_RNA_TRANSCRIPTION_AND_REPLICATION	REACTOME_INFLUENZA_VIRAL_RNA_TRANSCRIPTION_AND_REPLICATION	Details ...	97	0.768098	2.7935	0	0	0	3820	tags=75%, list=16%, signal=90%
REACTOME_3_UTR_MEDIATED_TRANSLATIONAL_REGULATION	REACTOME_3_UTR_MEDIATED_TRANSLATIONAL_REGULATION	Details ...	99	0.763005	2.78878	0	0	0	3820	tags=76%, list=16%, signal=90%
REACTOME_PEPTIDE_CHAIN_ELONGATION	REACTOME_PEPTIDE_CHAIN_ELONGATION	Details ...	81	0.78274	2.76201	0	0	0	4263	tags=85%, list=18%, signal=104%
KEGG_RIBOSOME	KEGG_RIBOSOME	Details ...	84	0.764556	2.74195	0	0	0	3820	tags=77%, list=16%, signal=92%
REACTOME_NONSENSE_MEDIATED_DECAY_ENHANCED_BY_THE_EXON_JUNCTION_COMPLEX	REACTOME_NONSENSE_MEDIATED_DECAY_ENHANCED_BY_THE_EXON_JUNCTION_COMPLEX	Details ...	102	0.734544	2.70186	0	0	0	3820	tags=71%, list=16%, signal=84%
REACTOME_METABOLISM_OF_MRNA	REACTOME_METABOLISM_OF_MRNA	Details ...	205	0.667328	2.68828	0	0	0	3820	tags=58%, list=16%, signal=68%
REACTOME_RESPIRATORY_ELECTRON_TRANSPORT_ATP_SYNTHESIS_BY_CHEMIOSMOTIC_COUPLING_AND_HEAT_PRODUCTION_BY_UNCOUPLING_PROTEINS_	REACTOME_RESPIRATORY_ELECTRON_TRANSPORT_ATP_SYNTHESIS_BY_CHEMIOSMOTIC_COUPLING_AND_HEAT_PRODUCTION_BY_UNCOUPLING_PROTEINS_	Details ...	77	0.750014	2.63964	0	0	0	3774	tags=73%, list=16%, signal=86%
REACTOME_INFLUENZA_LIFE_CYCLE	REACTOME_INFLUENZA_LIFE_CYCLE	Details ...	131	0.691999	2.63095	0	0	0	3820	tags=61%, list=16%, signal=73%
REACTOME_RNA_POL_I_PROMOTER_OPENING	REACTOME_RNA_POL_I_PROMOTER_OPENING	Details ...	44	0.834581	2.63035	0	0	0	2218	tags=75%, list=9%, signal=83%
BILANGES_SERUM_AND_RAPAMYCIN_SENSITIVE_GENES	BILANGES_SERUM_AND_RAPAMYCIN_SENSITIVE_GENES	Details ...	67	0.762998	2.61632	0	0	0	4263	tags=81%, list=18%, signal=98%
HSIAO_HOUSEKEEPING_GENES	HSIAO_HOUSEKEEPING_GENES	Details ...	370	0.60992	2.61081	0	0	0	4025	tags=54%, list=17%, signal=64%
REACTOME_AMYLOIDS	REACTOME_AMYLOIDS	Details ...	61	0.770584	2.6038	0	0	0	3617	tags=67%, list=15%, signal=79%
REACTOME_METABOLISM_OF_RNA	REACTOME_METABOLISM_OF_RNA	Details ...	249	0.632693	2.60038	0	0	0	3997	tags=53%, list=17%, signal=64%
YAO_TEMPORAL_RESPONSE_TO_PROGESTERONE_CLUSTER_13	YAO_TEMPORAL_RESPONSE_TO_PROGESTERONE_CLUSTER_13	Details ...	158	0.664699	2.58995	0	0	0	4338	tags=59%, list=19%, signal=72%
REACTOME_RESPIRATORY_ELECTRON_TRANSPORT	REACTOME_RESPIRATORY_ELECTRON_TRANSPORT	Details ...	62	0.75964	2.57934	0	0	0	3948	tags=76%, list=17%, signal=91%
MOOTHA_VOXPHOS	MOOTHA_VOXPHOS	Details ...	83	0.718994	2.55629	0	0	0	3948	tags=69%, list=17%, signal=82%
REACTOME_TCA_CYCLE_AND_RESPIRATORY_ELECTRON_TRANSPORT	REACTOME_TCA_CYCLE_AND_RESPIRATORY_ELECTRON_TRANSPORT	Details ...	112	0.689624	2.55566	0	0	0	3774	tags=65%, list=16%, signal=77%
REACTOME_ACTIVATION_OF_THE_MRNA_UPON_BINDING_OF_THE_CAP_BINDING_COMPLEX_AND_EIFS_AND_SUBSEQUENT_BINDING_TO_43S	REACTOME_ACTIVATION_OF_THE_MRNA_UPON_BINDING_OF_THE_CAP_BINDING_COMPLEX_AND_EIFS_AND_SUBSEQUENT_BINDING_TO_43S	Details ...	52	0.77372	2.54686	0	0	0	3820	tags=79%, list=16%, signal=94%
WONG_EMBRYONIC_STEM_CELL_CORE	WONG_EMBRYONIC_STEM_CELL_CORE		326	0.59885	2.53453	0	0	0	4961	tags=59%, list=21%, signal=73%
REACTOME_FORMATION_OF_THE_TERNARY_COMPLEX_AND_SUBSEQUENTLY_THE_43S_COMPLEX	REACTOME_FORMATION_OF_THE_TERNARY_COMPLEX_AND_SUBSEQUENTLY_THE_43S_COMPLEX		44	0.798417	2.53247	0	0	0	3820	tags=86%, list=16%, signal=103%
REACTOME_VIF_MEDIATED_DEGRADATION_OF_APOBEC3G	REACTOME_VIF_MEDIATED_DEGRADATION_OF_APOBEC3G		48	0.781515	2.51489	0	0	0	3118	tags=73%, list=13%, signal=84%
REACTOME_RNA_POL_I_TRANSCRIPTION	REACTOME_RNA_POL_I_TRANSCRIPTION		68	0.729039	2.50994	0	0	0	2218	tags=54%, list=9%, signal=60%
KEGG_SYSTEMIC_LUPUS_ERYTHEMATOSUS	KEGG_SYSTEMIC_LUPUS_ERYTHEMATOSUS		91	0.695006	2.50622	0	0	0	2541	tags=53%, list=11%, signal=59%
KEGG_OXIDATIVE_PHOSPHORYLATION	KEGG_OXIDATIVE_PHOSPHORYLATION		112	0.671502	2.50517	0	0	0	3948	tags=59%, list=17%, signal=71%
RHEIN_ALL_GLUCOCORTICOID_THERAPY_DN	RHEIN_ALL_GLUCOCORTICOID_THERAPY_DN		344	0.583853	2.48792	0	0	0	3996	tags=50%, list=17%, signal=59%
REACTOME_MEIOTIC_RECOMBINATION	REACTOME_MEIOTIC_RECOMBINATION		66	0.729539	2.48637	0	0	0	1824	tags=48%, list=8%, signal=52%
REACTOME_PACKAGING_OF_TELOMERE_ENDS	REACTOME_PACKAGING_OF_TELOMERE_ENDS		35	0.823963	2.48618	0	0	0	2205	tags=69%, list=9%, signal=76%
REACTOME_DEPOSITION_OF_NEW_CENPA_CONTAINING_NUCLEOSOMES_AT_THE_CENTROMERE	REACTOME_DEPOSITION_OF_NEW_CENPA_CONTAINING_NUCLEOSOMES_AT_THE_CENTROMERE		51	0.759781	2.48408	0	0	0	2205	tags=59%, list=9%, signal=65%
REACTOME_CDK_MEDIATED_PHOSPHORYLATION_AND_REMOVAL_OF_CDC6	REACTOME_CDK_MEDIATED_PHOSPHORYLATION_AND_REMOVAL_OF_CDC6		46	0.7723	2.47711	0	0	0	3960	tags=78%, list=17%, signal=94%
CHNG_MULTIPLE_MYELOMA_HYPERPLOID_UP	CHNG_MULTIPLE_MYELOMA_HYPERPLOID_UP		50	0.764564	2.47548	0	0	0	2953	tags=70%, list=13%, signal=80%
REACTOME_REGULATION_OF_ORNITHINE_DECARBOXYLASE_ODC	REACTOME_REGULATION_OF_ORNITHINE_DECARBOXYLASE_ODC		48	0.765296	2.45894	0	0	0	3118	tags=69%, list=13%, signal=79%
REACTOME_AUTODEGRADATION_OF_THE_E3_UBIQUITIN_LIGASE_COP1	REACTOME_AUTODEGRADATION_OF_THE_E3_UBIQUITIN_LIGASE_COP1		46	0.771349	2.45121	0	0	0	3118	tags=70%, list=13%, signal=80%
REACTOME_SCF_BETA_TRCP_MEDIATED_DEGRADATION_OF_EMI1	REACTOME_SCF_BETA_TRCP_MEDIATED_DEGRADATION_OF_EMI1		48	0.759473	2.43743	0	0	0	4190	tags=77%, list=18%, signal=94%
REACTOME_REGULATION_OF_MITOTIC_CELL_CYCLE	REACTOME_REGULATION_OF_MITOTIC_CELL_CYCLE		76	0.694521	2.43253	0	0	0	4190	tags=64%, list=18%, signal=78%
REACTOME_CROSS_PRESENTATION_OF_SOLUBLE_EXOGENOUS_ANTIGENS_ENDOSOMES	REACTOME_CROSS_PRESENTATION_OF_SOLUBLE_EXOGENOUS_ANTIGENS_ENDOSOMES		45	0.765035	2.4261	0	0	0	3118	tags=69%, list=13%, signal=79%
KEGG_HUNTINGTONS_DISEASE	KEGG_HUNTINGTONS_DISEASE		157	0.622757	2.42432	0	0	0	3948	tags=56%, list=17%, signal=67%
REACTOME_TELOMERE_MAINTENANCE	REACTOME_TELOMERE_MAINTENANCE		62	0.7149	2.41907	0	0	0	2407	tags=52%, list=10%, signal=57%
KEGG_PROTEASOME	KEGG_PROTEASOME		44	0.763559	2.41712	0	0	0	3118	tags=68%, list=13%, signal=79%
KEGG_PARKINSONS_DISEASE	KEGG_PARKINSONS_DISEASE		109	0.652193	2.41457	0	0	0	3948	tags=63%, list=17%, signal=76%
REACTOME_APC_C_CDH1_MEDIATED_DEGRADATION_OF_CDC20_AND_OTHER_APC_C_CDH1_TARGETED_PROTEINS_IN_LATE_MITOSIS_EARLY_G1	REACTOME_APC_C_CDH1_MEDIATED_DEGRADATION_OF_CDC20_AND_OTHER_APC_C_CDH1_TARGETED_PROTEINS_IN_LATE_MITOSIS_EARLY_G1		64	0.709646	2.4032	0	0	0	3118	tags=59%, list=13%, signal=68%
REACTOME_DESTABILIZATION_OF_MRNA_BY_AUF1_HNRNP_D0	REACTOME_DESTABILIZATION_OF_MRNA_BY_AUF1_HNRNP_D0		50	0.737987	2.4	0	0	0	3118	tags=66%, list=13%, signal=76%
REACTOME_APC_C_CDC20_MEDIATED_DEGRADATION_OF_MITOTIC_PROTEINS	REACTOME_APC_C_CDC20_MEDIATED_DEGRADATION_OF_MITOTIC_PROTEINS		65	0.69831	2.389	0	0	0	4122	tags=65%, list=18%, signal=78%
REACTOME_ASSEMBLY_OF_THE_PRE_REPLICATIVE_COMPLEX	REACTOME_ASSEMBLY_OF_THE_PRE_REPLICATIVE_COMPLEX		63	0.704443	2.38476	0	0	0	3960	tags=67%, list=17%, signal=80%
WONG_MITOCHONDRIA_GENE_MODULE	WONG_MITOCHONDRIA_GENE_MODULE		212	0.588978	2.38226	0	0	0	3956	tags=50%, list=17%, signal=60%
REACTOME_ACTIVATION_OF_NF_KAPPAB_IN_B_CELLS	REACTOME_ACTIVATION_OF_NF_KAPPAB_IN_B_CELLS		60	0.709267	2.38163	0	0	0	4116	tags=68%, list=18%, signal=83%
YAO_TEMPORAL_RESPONSE_TO_PROGESTERONE_CLUSTER_17	YAO_TEMPORAL_RESPONSE_TO_PROGESTERONE_CLUSTER_17		172	0.60198	2.38044	0	0	0	4572	tags=57%, list=20%, signal=70%
REACTOME_SIGNALING_BY_WNT	REACTOME_SIGNALING_BY_WNT		61	0.70778	2.37562	0	0	0	4551	tags=74%, list=19%, signal=91%
REACTOME_P53_INDEPENDENT_G1_S_DNA_DAMAGE_CHECKPOINT	REACTOME_P53_INDEPENDENT_G1_S_DNA_DAMAGE_CHECKPOINT		48	0.736523	2.36865	0	0	0	3118	tags=67%, list=13%, signal=77%
REACTOME_ER_PHAGOSOME_PATHWAY	REACTOME_ER_PHAGOSOME_PATHWAY		53	0.721706	2.36459	0	0	0	3118	tags=64%, list=13%, signal=74%
REACTOME_AUTODEGRADATION_OF_CDH1_BY_CDH1_APC_C	REACTOME_AUTODEGRADATION_OF_CDH1_BY_CDH1_APC_C		56	0.70945	2.35934	0	0	0	3960	tags=66%, list=17%, signal=79%
MORI_IMMATURE_B_LYMPHOCYTE_DN	MORI_IMMATURE_B_LYMPHOCYTE_DN		88	0.655592	2.35058	0	0	0	4961	tags=69%, list=21%, signal=88%
BILANGES_RAPAMYCIN_SENSITIVE_VIA_TSC1_AND_TSC2	BILANGES_RAPAMYCIN_SENSITIVE_VIA_TSC1_AND_TSC2		67	0.680041	2.33645	0	0	0	3446	tags=58%, list=15%, signal=68%
MALONEY_RESPONSE_TO_17AAG_DN	MALONEY_RESPONSE_TO_17AAG_DN		75	0.666332	2.32933	0	0	0	4357	tags=65%, list=19%, signal=80%
MORI_LARGE_PRE_BII_LYMPHOCYTE_UP	MORI_LARGE_PRE_BII_LYMPHOCYTE_UP		81	0.650875	2.31262	0	0	0	4894	tags=72%, list=21%, signal=90%
REACTOME_CDT1_ASSOCIATION_WITH_THE_CDC6_ORC_ORIGIN_COMPLEX	REACTOME_CDT1_ASSOCIATION_WITH_THE_CDC6_ORC_ORIGIN_COMPLEX		54	0.704285	2.31069	0	0	0	3960	tags=69%, list=17%, signal=82%
REACTOME_MEIOTIC_SYNAPSIS	REACTOME_MEIOTIC_SYNAPSIS		58	0.687887	2.30292	0	0	0	2390	tags=48%, list=10%, signal=54%
REACTOME_RNA_POL_I_RNA_POL_III_AND_MITOCHONDRIAL_TRANSCRIPTION	REACTOME_RNA_POL_I_RNA_POL_III_AND_MITOCHONDRIAL_TRANSCRIPTION		100	0.627992	2.29895	0	0	0	3554	tags=47%, list=15%, signal=55%
REACTOME_REGULATION_OF_APOPTOSIS	REACTOME_REGULATION_OF_APOPTOSIS		56	0.692843	2.29587	0	0	0	3118	tags=61%, list=13%, signal=70%
KEGG_ALZHEIMERS_DISEASE	KEGG_ALZHEIMERS_DISEASE		152	0.587626	2.28927	0	0	0	4049	tags=51%, list=17%, signal=62%
MOOTHA_HUMAN_MITODB_6_2002	MOOTHA_HUMAN_MITODB_6_2002		410	0.529174	2.2865	0	0	0	3969	tags=46%, list=17%, signal=55%
LI_AMPLIFIED_IN_LUNG_CANCER	LI_AMPLIFIED_IN_LUNG_CANCER		168	0.580008	2.27932	0	0	0	4032	tags=52%, list=17%, signal=63%
REACTOME_SCFSKP2_MEDIATED_DEGRADATION_OF_P27_P21	REACTOME_SCFSKP2_MEDIATED_DEGRADATION_OF_P27_P21		52	0.69567	2.27878	0	0	0	3675	tags=69%, list=16%, signal=82%
REACTOME_MEIOSIS	REACTOME_MEIOSIS		93	0.626767	2.27314	0	0	0	1824	tags=38%, list=8%, signal=41%
STARK_PREFRONTAL_CORTEX_22Q11_DELETION_DN	STARK_PREFRONTAL_CORTEX_22Q11_DELETION_DN		459	0.521859	2.27225	0	0	0	4575	tags=49%, list=20%, signal=59%
REACTOME_TRANSCRIPTION	REACTOME_TRANSCRIPTION		176	0.573389	2.27037	0	0	0	3767	tags=45%, list=16%, signal=53%
REACTOME_M_G1_TRANSITION	REACTOME_M_G1_TRANSITION		77	0.64193	2.25738	0	2.0113e-06	0.0001	3960	tags=58%, list=17%, signal=70%
REACTOME_HOST_INTERACTIONS_OF_HIV_FACTORS	REACTOME_HOST_INTERACTIONS_OF_HIV_FACTORS		115	0.601082	2.25194	0	1.98215e-06	0.0001	4873	tags=57%, list=21%, signal=71%
REACTOME_METABOLISM_OF_PROTEINS	REACTOME_METABOLISM_OF_PROTEINS		396	0.523588	2.25019	0	1.95383e-06	0.0001	4857	tags=52%, list=21%, signal=65%
REACTOME_REGULATION_OF_MRNA_STABILITY_BY_PROTEINS_THAT_BIND_AU_RICH_ELEMENTS	REACTOME_REGULATION_OF_MRNA_STABILITY_BY_PROTEINS_THAT_BIND_AU_RICH_ELEMENTS		81	0.634119	2.24996	0	1.92631e-06	0.0001	3118	tags=51%, list=13%, signal=58%
REACTOME_P53_DEPENDENT_G1_DNA_DAMAGE_RESPONSE	REACTOME_P53_DEPENDENT_G1_DNA_DAMAGE_RESPONSE		52	0.689517	2.24316	0	5.73066e-06	0.0003	3960	tags=67%, list=17%, signal=81%
MOOTHA_MITOCHONDRIA	MOOTHA_MITOCHONDRIA		420	0.517207	2.24259	0	5.65215e-06	0.0003	4782	tags=50%, list=20%, signal=62%
REACTOME_ORC1_REMOVAL_FROM_CHROMATIN	REACTOME_ORC1_REMOVAL_FROM_CHROMATIN		65	0.655771	2.24055	0	5.57577e-06	0.0003	3960	tags=65%, list=17%, signal=78%
TIEN_INTESTINE_PROBIOTICS_6HR_UP	TIEN_INTESTINE_PROBIOTICS_6HR_UP		51	0.68701	2.23185	0	1.09395e-05	0.0006	4956	tags=73%, list=21%, signal=92%
PECE_MAMMARY_STEM_CELL_UP	PECE_MAMMARY_STEM_CELL_UP		123	0.590001	2.22865	0	1.25245e-05	0.0007	3458	tags=47%, list=15%, signal=55%
WINNEPENNINCKX_MELANOMA_METASTASIS_UP	WINNEPENNINCKX_MELANOMA_METASTASIS_UP		149	0.571284	2.21036	0	1.58877e-05	0.0009	5562	tags=59%, list=24%, signal=77%
TIEN_INTESTINE_PROBIOTICS_24HR_DN	TIEN_INTESTINE_PROBIOTICS_24HR_DN		198	0.54949	2.20872	0	1.56841e-05	0.0009	3962	tags=44%, list=17%, signal=53%
DANG_MYC_TARGETS_UP	DANG_MYC_TARGETS_UP		138	0.573581	2.20254	0	1.54855e-05	0.0009	5198	tags=55%, list=22%, signal=70%
REACTOME_CHROMOSOME_MAINTENANCE	REACTOME_CHROMOSOME_MAINTENANCE		105	0.594607	2.19875	0	1.69678e-05	0.001	2407	tags=39%, list=10%, signal=43%
REACTOME_ANTIGEN_PROCESSING_CROSS_PRESENTATION	REACTOME_ANTIGEN_PROCESSING_CROSS_PRESENTATION		65	0.639951	2.18543	0	2.5186e-05	0.0015	3118	tags=57%, list=13%, signal=65%
REACTOME_S_PHASE	REACTOME_S_PHASE		105	0.590037	2.17805	0	2.98338e-05	0.0018	3960	tags=53%, list=17%, signal=64%
WANG_TUMOR_INVASIVENESS_UP	WANG_TUMOR_INVASIVENESS_UP		354	0.508901	2.16922	0	4.25234e-05	0.0026	4263	tags=46%, list=18%, signal=55%
HOFFMANN_LARGE_TO_SMALL_PRE_BII_LYMPHOCYTE_UP	HOFFMANN_LARGE_TO_SMALL_PRE_BII_LYMPHOCYTE_UP		153	0.560436	2.16674	0	4.52267e-05	0.0028	4986	tags=58%, list=21%, signal=73%
BIOCARTA_PROTEASOME_PATHWAY	BIOCARTA_PROTEASOME_PATHWAY		28	0.754115	2.16454	0	4.94648e-05	0.0031	3002	tags=75%, list=13%, signal=86%
KAMMINGA_EZH2_TARGETS	KAMMINGA_EZH2_TARGETS		41	0.695631	2.16396	0	4.88897e-05	0.0031	4916	tags=66%, list=21%, signal=83%
YAO_TEMPORAL_RESPONSE_TO_PROGESTERONE_CLUSTER_14	YAO_TEMPORAL_RESPONSE_TO_PROGESTERONE_CLUSTER_14		136	0.563853	2.16067	0	4.98678e-05	0.0032	4929	tags=56%, list=21%, signal=70%
SANA_RESPONSE_TO_IFNG_DN	SANA_RESPONSE_TO_IFNG_DN		80	0.612384	2.15919	0	5.08229e-05	0.0033	3997	tags=56%, list=17%, signal=68%
CHIANG_LIVER_CANCER_SUBCLASS_UNANNOTATED_DN	CHIANG_LIVER_CANCER_SUBCLASS_UNANNOTATED_DN		177	0.545348	2.15909	0	5.02518e-05	0.0033	4011	tags=47%, list=17%, signal=56%
REACTOME_HIV_INFECTION	REACTOME_HIV_INFECTION		179	0.543888	2.15546	0	5.26791e-05	0.0035	4876	tags=51%, list=21%, signal=64%
FLOTHO_PEDIATRIC_ALL_THERAPY_RESPONSE_UP	FLOTHO_PEDIATRIC_ALL_THERAPY_RESPONSE_UP		50	0.664405	2.14837	0	6.40768e-05	0.0042	2878	tags=50%, list=12%, signal=57%
REACTOME_CYCLIN_E_ASSOCIATED_EVENTS_DURING_G1_S_TRANSITION_	REACTOME_CYCLIN_E_ASSOCIATED_EVENTS_DURING_G1_S_TRANSITION_		61	0.63518	2.14713	0	6.33803e-05	0.0042	3118	tags=61%, list=13%, signal=70%
RAHMAN_TP53_TARGETS_PHOSPHORYLATED	RAHMAN_TP53_TARGETS_PHOSPHORYLATED		21	0.796398	2.14213	0	6.85e-05	0.0046	3583	tags=81%, list=15%, signal=95%
ZHOU_CELL_CYCLE_GENES_IN_IR_RESPONSE_24HR	ZHOU_CELL_CYCLE_GENES_IN_IR_RESPONSE_24HR		119	0.569243	2.14193	0	6.77713e-05	0.0046	6188	tags=66%, list=26%, signal=89%
OUELLET_OVARIAN_CANCER_INVASIVE_VS_LMP_UP	OUELLET_OVARIAN_CANCER_INVASIVE_VS_LMP_UP		112	0.573005	2.14148	0	6.70579e-05	0.0046	5095	tags=58%, list=22%, signal=74%
REACTOME_SYNTHESIS_OF_DNA	REACTOME_SYNTHESIS_OF_DNA		90	0.594946	2.13779	0	7.77255e-05	0.0054	3960	tags=54%, list=17%, signal=65%
REACTOME_CELL_CYCLE	REACTOME_CELL_CYCLE		378	0.496137	2.13372	0	8.67336e-05	0.0061	4695	tags=44%, list=20%, signal=54%
SOTIRIOU_BREAST_CANCER_GRADE_1_VS_3_UP	SOTIRIOU_BREAST_CANCER_GRADE_1_VS_3_UP		140	0.552142	2.12598	0	9.27455e-05	0.0066	5515	tags=59%, list=24%, signal=77%
LUI_TARGETS_OF_PAX8_PPARG_FUSION	LUI_TARGETS_OF_PAX8_PPARG_FUSION		32	0.715465	2.11341	0.000215983	0.000117993	0.0085	3360	tags=63%, list=14%, signal=73%
IRITANI_MAD1_TARGETS_DN	IRITANI_MAD1_TARGETS_DN		46	0.661464	2.11127	0	0.000119566	0.0087	5746	tags=67%, list=25%, signal=89%
AMUNDSON_GAMMA_RADIATION_RESPONSE	AMUNDSON_GAMMA_RADIATION_RESPONSE		39	0.686229	2.10867	0	0.000121067	0.0089	3566	tags=56%, list=15%, signal=66%
REACTOME_DOWNSTREAM_SIGNALING_EVENTS_OF_B_CELL_RECEPTOR_BCR	REACTOME_DOWNSTREAM_SIGNALING_EVENTS_OF_B_CELL_RECEPTOR_BCR		90	0.581665	2.10645	0	0.000122533	0.0091	4116	tags=51%, list=18%, signal=62%
CROONQUIST_IL6_DEPRIVATION_DN	CROONQUIST_IL6_DEPRIVATION_DN		95	0.575254	2.09342	0	0.000183218	0.0138	5573	tags=64%, list=24%, signal=84%
ZHONG_SECRETOME_OF_LUNG_CANCER_AND_FIBROBLAST	ZHONG_SECRETOME_OF_LUNG_CANCER_AND_FIBROBLAST		125	0.552301	2.09071	0	0.000190511	0.0145	4328	tags=51%, list=18%, signal=62%
ZHONG_SECRETOME_OF_LUNG_CANCER_AND_MACROPHAGE	ZHONG_SECRETOME_OF_LUNG_CANCER_AND_MACROPHAGE		76	0.592498	2.08791	0	0.000206866	0.0159	3983	tags=54%, list=17%, signal=65%
PENG_RAPAMYCIN_RESPONSE_DN	PENG_RAPAMYCIN_RESPONSE_DN		229	0.510427	2.08649	0	0.000213882	0.0165	5094	tags=49%, list=22%, signal=62%
SHIPP_DLBCL_VS_FOLLICULAR_LYMPHOMA_UP	SHIPP_DLBCL_VS_FOLLICULAR_LYMPHOMA_UP		43	0.661154	2.08306	0	0.000231958	0.0181	4260	tags=63%, list=18%, signal=77%
PELLICCIOTTA_HDAC_IN_ANTIGEN_PRESENTATION_DN	PELLICCIOTTA_HDAC_IN_ANTIGEN_PRESENTATION_DN		45	0.658045	2.08075	0	0.000246009	0.0194	3080	tags=53%, list=13%, signal=61%
REACTOME_MITOTIC_M_M_G1_PHASES	REACTOME_MITOTIC_M_M_G1_PHASES		166	0.527173	2.0683	0	0.000331901	0.0264	5197	tags=51%, list=22%, signal=65%
FOURNIER_ACINAR_DEVELOPMENT_LATE_2	FOURNIER_ACINAR_DEVELOPMENT_LATE_2		259	0.500114	2.06685	0	0.000347519	0.0278	5182	tags=45%, list=22%, signal=57%
POMEROY_MEDULLOBLASTOMA_PROGNOSIS_DN	POMEROY_MEDULLOBLASTOMA_PROGNOSIS_DN		43	0.65579	2.06561	0	0.00035058	0.0283	3868	tags=56%, list=17%, signal=67%
JIANG_AGING_HYPOTHALAMUS_UP	JIANG_AGING_HYPOTHALAMUS_UP		43	0.652641	2.06084	0	0.000377914	0.0307	4302	tags=67%, list=18%, signal=82%
LUI_THYROID_CANCER_CLUSTER_3	LUI_THYROID_CANCER_CLUSTER_3		28	0.720319	2.05842	0	0.000396172	0.0324	3360	tags=64%, list=14%, signal=75%
REACTOME_CELL_CYCLE_CHECKPOINTS	REACTOME_CELL_CYCLE_CHECKPOINTS		110	0.551424	2.05617	0	0.000419982	0.0346	4147	tags=48%, list=18%, signal=58%
BENPORATH_PROLIFERATION	BENPORATH_PROLIFERATION		136	0.537087	2.05555	0	0.000426865	0.0355	4538	tags=49%, list=19%, signal=60%
ZAMORA_NOS2_TARGETS_UP	ZAMORA_NOS2_TARGETS_UP		64	0.604259	2.05452	0	0.000431361	0.0362	4128	tags=53%, list=18%, signal=64%
GAVIN_FOXP3_TARGETS_CLUSTER_T7	GAVIN_FOXP3_TARGETS_CLUSTER_T7		92	0.567196	2.05021	0	0.000457953	0.0388	5085	tags=64%, list=22%, signal=82%
MENSSEN_MYC_TARGETS	MENSSEN_MYC_TARGETS		50	0.631744	2.04633	0	0.000502393	0.0429	4822	tags=60%, list=21%, signal=75%
KEGG_SPLICEOSOME	KEGG_SPLICEOSOME		121	0.539474	2.04076	0	0.000564191	0.0484	5187	tags=52%, list=22%, signal=67%
KEGG_PROPANOATE_METABOLISM	KEGG_PROPANOATE_METABOLISM		31	0.697553	2.03918	0	0.000572048	0.0495	2367	tags=48%, list=10%, signal=54%
ROME_INSULIN_TARGETS_IN_MUSCLE_UP	ROME_INSULIN_TARGETS_IN_MUSCLE_UP		389	0.475038	2.03885	0	0.000570701	0.0497	3799	tags=39%, list=16%, signal=46%
TARTE_PLASMA_CELL_VS_PLASMABLAST_DN	TARTE_PLASMA_CELL_VS_PLASMABLAST_DN		298	0.48204	2.02689	0	0.000703011	0.0616	5095	tags=50%, list=22%, signal=63%
REACTOME_G1_S_TRANSITION	REACTOME_G1_S_TRANSITION		103	0.550703	2.02685	0	0.000698383	0.0617	3960	tags=52%, list=17%, signal=63%
BORCZUK_MALIGNANT_MESOTHELIOMA_UP	BORCZUK_MALIGNANT_MESOTHELIOMA_UP		284	0.483984	2.0147	0	0.000848381	0.075	5184	tags=50%, list=22%, signal=63%
LEE_EARLY_T_LYMPHOCYTE_UP	LEE_EARLY_T_LYMPHOCYTE_UP		94	0.554118	2.01142	0	0.000898178	0.0798	5147	tags=52%, list=22%, signal=67%
MODY_HIPPOCAMPUS_PRENATAL	MODY_HIPPOCAMPUS_PRENATAL		41	0.64388	2.00994	0.000220897	0.000922407	0.0823	5467	tags=73%, list=23%, signal=95%
REACTOME_APOPTOSIS	REACTOME_APOPTOSIS		137	0.522767	2.00561	0	0.000984226	0.0884	3118	tags=42%, list=13%, signal=49%
CHIARETTI_T_ALL_REFRACTORY_TO_THERAPY	CHIARETTI_T_ALL_REFRACTORY_TO_THERAPY		28	0.700607	1.99448	0	0.00118411	0.1058	459	tags=25%, list=2%, signal=25%
ZHAN_MULTIPLE_MYELOMA_SUBGROUPS	ZHAN_MULTIPLE_MYELOMA_SUBGROUPS		30	0.683633	1.99331	0	0.00120337	0.108	3870	tags=63%, list=17%, signal=76%
FERRANDO_T_ALL_WITH_MLL_ENL_FUSION_DN	FERRANDO_T_ALL_WITH_MLL_ENL_FUSION_DN		81	0.563271	1.99026	0	0.00125472	0.1133	4296	tags=52%, list=18%, signal=63%
REACTOME_DNA_REPLICATION	REACTOME_DNA_REPLICATION		186	0.500523	1.98886	0	0.00127318	0.1153	4685	tags=46%, list=20%, signal=57%
ZHANG_RESPONSE_TO_CANTHARIDIN_DN	ZHANG_RESPONSE_TO_CANTHARIDIN_DN		65	0.584829	1.98806	0	0.00128604	0.1172	4980	tags=60%, list=21%, signal=76%
STEIN_ESRRA_TARGETS_UP	STEIN_ESRRA_TARGETS_UP		345	0.467317	1.98777	0	0.00128346	0.1177	5133	tags=47%, list=22%, signal=59%
REACTOME_MRNA_SPLICING	REACTOME_MRNA_SPLICING		105	0.539546	1.98326	0	0.00137715	0.127	5126	tags=51%, list=22%, signal=66%
LEE_LIVER_CANCER_SURVIVAL_DN	LEE_LIVER_CANCER_SURVIVAL_DN		162	0.507054	1.98183	0	0.00140696	0.1306	5743	tags=58%, list=25%, signal=76%
MOOTHA_PGC	MOOTHA_PGC		390	0.46112	1.98157	0	0.00140362	0.1312	4032	tags=40%, list=17%, signal=48%
REACTOME_MITOTIC_G1_G1_S_PHASES	REACTOME_MITOTIC_G1_G1_S_PHASES		127	0.52299	1.97837	0	0.00146347	0.1372	3960	tags=46%, list=17%, signal=55%
MORI_PRE_BI_LYMPHOCYTE_UP	MORI_PRE_BI_LYMPHOCYTE_UP		77	0.562752	1.97825	0	0.00145676	0.1375	4838	tags=65%, list=21%, signal=82%
NGO_MALIGNANT_GLIOMA_1P_LOH	NGO_MALIGNANT_GLIOMA_1P_LOH		15	0.80208	1.96582	0.000210748	0.00178693	0.1673	3342	tags=73%, list=14%, signal=85%
OHM_METHYLATED_IN_ADULT_CANCERS	OHM_METHYLATED_IN_ADULT_CANCERS		26	0.694611	1.96491	0	0.00179937	0.1695	910	tags=19%, list=4%, signal=20%
BAE_BRCA1_TARGETS_UP	BAE_BRCA1_TARGETS_UP		70	0.569446	1.96344	0	0.00182976	0.1732	4273	tags=46%, list=18%, signal=56%
TANG_SENESCENCE_TP53_TARGETS_DN	TANG_SENESCENCE_TP53_TARGETS_DN		51	0.601628	1.95827	0	0.00197358	0.1862	5562	tags=63%, list=24%, signal=82%
KAYO_AGING_MUSCLE_DN	KAYO_AGING_MUSCLE_DN		113	0.52166	1.9576	0	0.00197583	0.1877	3050	tags=40%, list=13%, signal=46%
KEGG_PYRUVATE_METABOLISM	KEGG_PYRUVATE_METABOLISM		36	0.642181	1.95679	0.000448129	0.00198001	0.1894	2675	tags=44%, list=11%, signal=50%
KEGG_CITRATE_CYCLE_TCA_CYCLE	KEGG_CITRATE_CYCLE_TCA_CYCLE		28	0.681944	1.95548	0.000215378	0.00201411	0.1934	3713	tags=54%, list=16%, signal=64%
BOUDOUKHA_BOUND_BY_IGF2BP2	BOUDOUKHA_BOUND_BY_IGF2BP2		101	0.533431	1.95329	0	0.00207102	0.1994	4739	tags=49%, list=20%, signal=61%
NAKAJIMA_MAST_CELL	NAKAJIMA_MAST_CELL		43	0.61802	1.94859	0.000218723	0.0022334	0.2142	4250	tags=42%, list=18%, signal=51%
SCHLOSSER_MYC_TARGETS_AND_SERUM_RESPONSE_UP	SCHLOSSER_MYC_TARGETS_AND_SERUM_RESPONSE_UP		45	0.611099	1.94855	0	0.00221831	0.2142	5016	tags=56%, list=21%, signal=71%
SCHLOSSER_MYC_TARGETS_REPRESSED_BY_SERUM	SCHLOSSER_MYC_TARGETS_REPRESSED_BY_SERUM		148	0.503075	1.94849	0	0.00220525	0.2143	5769	tags=53%, list=25%, signal=70%
MOOTHA_TCA	MOOTHA_TCA		15	0.788838	1.94694	0.000209249	0.0022456	0.2191	3360	tags=80%, list=14%, signal=93%
REACTOME_METABOLISM_OF_AMINO_ACIDS_AND_DERIVATIVES	REACTOME_METABOLISM_OF_AMINO_ACIDS_AND_DERIVATIVES		191	0.485394	1.94662	0	0.00224249	0.2203	3713	tags=35%, list=16%, signal=41%
ZHOU_TNF_SIGNALING_4HR	ZHOU_TNF_SIGNALING_4HR		52	0.594148	1.94092	0	0.00241216	0.236	4338	tags=54%, list=19%, signal=66%
ISHIDA_E2F_TARGETS	ISHIDA_E2F_TARGETS		51	0.594304	1.93815	0.000430663	0.00250379	0.2457	6290	tags=73%, list=27%, signal=99%
BURTON_ADIPOGENESIS_5	BURTON_ADIPOGENESIS_5		108	0.520485	1.93422	0	0.00264664	0.2579	4090	tags=45%, list=17%, signal=55%
REACTOME_MRNA_SPLICING_MINOR_PATHWAY	REACTOME_MRNA_SPLICING_MINOR_PATHWAY		41	0.619019	1.92753	0	0.00295849	0.287	4988	tags=54%, list=21%, signal=68%
GRADE_METASTASIS_DN	GRADE_METASTASIS_DN		44	0.606047	1.92685	0	0.00296926	0.2891	5262	tags=59%, list=22%, signal=76%
PENG_LEUCINE_DEPRIVATION_DN	PENG_LEUCINE_DEPRIVATION_DN		179	0.487145	1.92663	0	0.00296241	0.2902	4767	tags=49%, list=20%, signal=61%
CAFFAREL_RESPONSE_TO_THC_DN	CAFFAREL_RESPONSE_TO_THC_DN		26	0.679776	1.92566	0	0.00297544	0.293	4869	tags=69%, list=21%, signal=87%
RHODES_CANCER_META_SIGNATURE	RHODES_CANCER_META_SIGNATURE		62	0.571227	1.92518	0	0.00297534	0.2947	5131	tags=65%, list=22%, signal=82%
REACTOME_NEF_MEDIATES_DOWN_MODULATION_OF_CELL_SURFACE_RECEPTORS_BY_RECRUITING_THEM_TO_CLATHRIN_ADAPTERS	REACTOME_NEF_MEDIATES_DOWN_MODULATION_OF_CELL_SURFACE_RECEPTORS_BY_RECRUITING_THEM_TO_CLATHRIN_ADAPTERS		18	0.744155	1.9172	0.000214041	0.0033746	0.331	2310	tags=50%, list=10%, signal=55%
CROONQUIST_NRAS_SIGNALING_DN	CROONQUIST_NRAS_SIGNALING_DN		70	0.552936	1.91442	0	0.00349179	0.3412	4239	tags=54%, list=18%, signal=66%
HONMA_DOCETAXEL_RESISTANCE	HONMA_DOCETAXEL_RESISTANCE		31	0.646737	1.9073	0.000213356	0.00387263	0.3728	3032	tags=48%, list=13%, signal=56%
SPIELMAN_LYMPHOBLAST_EUROPEAN_VS_ASIAN_UP	SPIELMAN_LYMPHOBLAST_EUROPEAN_VS_ASIAN_UP		447	0.437266	1.9038	0	0.00403878	0.3868	5182	tags=48%, list=22%, signal=61%
WANG_METHYLATED_IN_BREAST_CANCER	WANG_METHYLATED_IN_BREAST_CANCER		32	0.641431	1.90287	0.000216779	0.0040793	0.3918	1101	tags=22%, list=5%, signal=23%
PENG_GLUTAMINE_DEPRIVATION_DN	PENG_GLUTAMINE_DEPRIVATION_DN		320	0.449589	1.89795	0	0.00436854	0.4152	4529	tags=41%, list=19%, signal=50%
REACTOME_CELL_CYCLE_MITOTIC	REACTOME_CELL_CYCLE_MITOTIC		301	0.451071	1.89525	0	0.00451407	0.4279	5053	tags=43%, list=22%, signal=54%
WANG_BARRETTS_ESOPHAGUS_DN	WANG_BARRETTS_ESOPHAGUS_DN		23	0.690693	1.89382	0.000425713	0.0045831	0.4332	1987	tags=35%, list=8%, signal=38%
BURTON_ADIPOGENESIS_PEAK_AT_24HR	BURTON_ADIPOGENESIS_PEAK_AT_24HR		41	0.607201	1.89134	0	0.00472001	0.4432	5562	tags=66%, list=24%, signal=86%
ROSTY_CERVICAL_CANCER_PROLIFERATION_CLUSTER	ROSTY_CERVICAL_CANCER_PROLIFERATION_CLUSTER		134	0.49508	1.88866	0	0.00489612	0.4576	5136	tags=51%, list=22%, signal=65%
MISSIAGLIA_REGULATED_BY_METHYLATION_DN	MISSIAGLIA_REGULATED_BY_METHYLATION_DN		112	0.504532	1.88539	0	0.00509945	0.4737	6243	tags=61%, list=27%, signal=82%
ZHAN_MULTIPLE_MYELOMA_PR_UP	ZHAN_MULTIPLE_MYELOMA_PR_UP		43	0.594506	1.87792	0.000429923	0.00565381	0.5095	5723	tags=60%, list=24%, signal=80%
JIANG_HYPOXIA_CANCER	JIANG_HYPOXIA_CANCER		79	0.531972	1.87735	0	0.00567621	0.513	4531	tags=51%, list=19%, signal=63%
BASAKI_YBX1_TARGETS_UP	BASAKI_YBX1_TARGETS_UP		261	0.454375	1.87638	0	0.00572043	0.518	4549	tags=41%, list=19%, signal=50%
REACTOME_CITRIC_ACID_CYCLE_TCA_CYCLE	REACTOME_CITRIC_ACID_CYCLE_TCA_CYCLE		18	0.724723	1.87627	0.00149765	0.00569144	0.5183	3713	tags=72%, list=16%, signal=86%
REACTOME_PROCESSING_OF_CAPPED_INTRON_CONTAINING_PRE_MRNA	REACTOME_PROCESSING_OF_CAPPED_INTRON_CONTAINING_PRE_MRNA		134	0.490233	1.87542	0	0.00572649	0.522	5158	tags=48%, list=22%, signal=61%
BOYAULT_LIVER_CANCER_SUBCLASS_G3_UP	BOYAULT_LIVER_CANCER_SUBCLASS_G3_UP		181	0.472996	1.87056	0	0.00612807	0.5495	5748	tags=50%, list=25%, signal=65%
TAKAO_RESPONSE_TO_UVB_RADIATION_UP	TAKAO_RESPONSE_TO_UVB_RADIATION_UP		82	0.526768	1.87049	0	0.00609726	0.55	3956	tags=49%, list=17%, signal=58%
PID_AURORA_B_PATHWAY	PID_AURORA_B_PATHWAY		38	0.608653	1.86852	0.000649632	0.00621871	0.5595	6290	tags=66%, list=27%, signal=90%
REN_BOUND_BY_E2F	REN_BOUND_BY_E2F		58	0.561036	1.86786	0.000880669	0.0062429	0.5629	3717	tags=43%, list=16%, signal=51%
RHODES_UNDIFFERENTIATED_CANCER	RHODES_UNDIFFERENTIATED_CANCER		66	0.547408	1.86739	0.000224568	0.00624307	0.5651	4260	tags=56%, list=18%, signal=68%
DAIRKEE_TERT_TARGETS_UP	DAIRKEE_TERT_TARGETS_UP		329	0.438957	1.86508	0	0.00641086	0.5774	5095	tags=44%, list=22%, signal=55%
LUI_THYROID_CANCER_PAX8_PPARG_DN	LUI_THYROID_CANCER_PAX8_PPARG_DN		43	0.590793	1.86427	0.000439464	0.0064534	0.5824	3367	tags=58%, list=14%, signal=68%
GREENBAUM_E2A_TARGETS_UP	GREENBAUM_E2A_TARGETS_UP		30	0.641646	1.86389	0.000640752	0.00645233	0.584	5515	tags=63%, list=24%, signal=83%
BURTON_ADIPOGENESIS_6	BURTON_ADIPOGENESIS_6		173	0.471913	1.86369	0	0.00643199	0.5849	3566	tags=39%, list=15%, signal=45%
TIEN_INTESTINE_PROBIOTICS_2HR_UP	TIEN_INTESTINE_PROBIOTICS_2HR_UP		25	0.669187	1.86207	0.00108956	0.00653508	0.5929	3840	tags=56%, list=16%, signal=67%
ZHANG_TLX_TARGETS_60HR_DN	ZHANG_TLX_TARGETS_60HR_DN		264	0.449987	1.86194	0	0.00651154	0.5939	5920	tags=48%, list=25%, signal=64%
PELLICCIOTTA_HDAC_IN_ANTIGEN_PRESENTATION_UP	PELLICCIOTTA_HDAC_IN_ANTIGEN_PRESENTATION_UP		62	0.549035	1.85466	0.000222916	0.00712964	0.6291	4467	tags=53%, list=19%, signal=66%
LY_AGING_OLD_DN	LY_AGING_OLD_DN		55	0.558477	1.85132	0.000222272	0.00742961	0.6456	4618	tags=53%, list=20%, signal=66%
WONG_PROTEASOME_GENE_MODULE	WONG_PROTEASOME_GENE_MODULE		47	0.574779	1.84987	0.000217014	0.00753642	0.6523	4122	tags=57%, list=18%, signal=70%
REACTOME_ABORTIVE_ELONGATION_OF_HIV1_TRANSCRIPT_IN_THE_ABSENCE_OF_TAT	REACTOME_ABORTIVE_ELONGATION_OF_HIV1_TRANSCRIPT_IN_THE_ABSENCE_OF_TAT		17	0.724374	1.84934	0.0020803	0.00755517	0.6552	3175	tags=53%, list=14%, signal=61%
CHESLER_BRAIN_QTL_CIS	CHESLER_BRAIN_QTL_CIS		69	0.535212	1.84915	0.000219154	0.00753541	0.6557	4375	tags=39%, list=19%, signal=48%
KIM_ALL_DISORDERS_DURATION_CORR_DN	KIM_ALL_DISORDERS_DURATION_CORR_DN		136	0.480782	1.84629	0	0.00778072	0.6695	5039	tags=47%, list=22%, signal=60%
LI_DCP2_BOUND_MRNA	LI_DCP2_BOUND_MRNA		85	0.518181	1.84613	0.00022831	0.00775793	0.6702	4873	tags=52%, list=21%, signal=65%
ALONSO_METASTASIS_UP	ALONSO_METASTASIS_UP		175	0.467157	1.84599	0	0.00773761	0.671	4808	tags=46%, list=21%, signal=57%
FERRANDO_HOX11_NEIGHBORS	FERRANDO_HOX11_NEIGHBORS		17	0.728109	1.84447	0.00129786	0.00786066	0.6787	3492	tags=59%, list=15%, signal=69%
ZHONG_SECRETOME_OF_LUNG_CANCER_AND_ENDOTHELIUM	ZHONG_SECRETOME_OF_LUNG_CANCER_AND_ENDOTHELIUM		62	0.54467	1.84418	0	0.00785653	0.6803	4375	tags=56%, list=19%, signal=69%
STEIN_ESRRA_TARGETS	STEIN_ESRRA_TARGETS		468	0.422056	1.84324	0	0.00792435	0.6857	3924	tags=35%, list=17%, signal=41%
REACTOME_MITOCHONDRIAL_PROTEIN_IMPORT	REACTOME_MITOCHONDRIAL_PROTEIN_IMPORT		46	0.578703	1.84263	0.00043535	0.00795089	0.6881	4968	tags=61%, list=21%, signal=77%
MORI_MATURE_B_LYMPHOCYTE_DN	MORI_MATURE_B_LYMPHOCYTE_DN		72	0.5311	1.84171	0	0.00800698	0.6938	5136	tags=57%, list=22%, signal=73%
MARKEY_RB1_ACUTE_LOF_UP	MARKEY_RB1_ACUTE_LOF_UP		219	0.45273	1.84144	0	0.0080002	0.6953	3885	tags=39%, list=17%, signal=47%
MUELLER_PLURINET	MUELLER_PLURINET		284	0.439754	1.84103	0	0.00799091	0.6967	5232	tags=44%, list=22%, signal=56%
PID_HDAC_CLASSII_PATHWAY	PID_HDAC_CLASSII_PATHWAY		34	0.615574	1.84014	0.00107135	0.00803864	0.7001	3140	tags=47%, list=13%, signal=54%
ZHOU_CELL_CYCLE_GENES_IN_IR_RESPONSE_6HR	ZHOU_CELL_CYCLE_GENES_IN_IR_RESPONSE_6HR		81	0.518625	1.83897	0	0.00811862	0.7055	6188	tags=62%, list=26%, signal=84%
JOHANSSON_GLIOMAGENESIS_BY_PDGFB_UP	JOHANSSON_GLIOMAGENESIS_BY_PDGFB_UP		52	0.561815	1.83866	0.000661376	0.00811478	0.7072	2944	tags=46%, list=13%, signal=53%
LUND_SILENCED_BY_METHYLATION	LUND_SILENCED_BY_METHYLATION		16	0.727795	1.83513	0.00252632	0.0084643	0.7244	1541	tags=38%, list=7%, signal=40%
YAO_TEMPORAL_RESPONSE_TO_PROGESTERONE_CLUSTER_10	YAO_TEMPORAL_RESPONSE_TO_PROGESTERONE_CLUSTER_10		64	0.536154	1.83114	0.000222767	0.00888142	0.7422	4856	tags=55%, list=21%, signal=69%
BASSO_B_LYMPHOCYTE_NETWORK	BASSO_B_LYMPHOCYTE_NETWORK		138	0.475667	1.82622	0	0.00939173	0.7659	3960	tags=43%, list=17%, signal=51%
WIERENGA_PML_INTERACTOME	WIERENGA_PML_INTERACTOME		40	0.586117	1.82367	0	0.00965909	0.7774	4455	tags=50%, list=19%, signal=62%
GRAHAM_CML_DIVIDING_VS_NORMAL_QUIESCENT_UP	GRAHAM_CML_DIVIDING_VS_NORMAL_QUIESCENT_UP		171	0.462632	1.82328	0	0.00966167	0.7792	4503	tags=49%, list=19%, signal=60%
DANG_REGULATED_BY_MYC_UP	DANG_REGULATED_BY_MYC_UP		64	0.534231	1.82153	0	0.00982958	0.7852	4396	tags=50%, list=19%, signal=61%
SONG_TARGETS_OF_IE86_CMV_PROTEIN	SONG_TARGETS_OF_IE86_CMV_PROTEIN		58	0.546463	1.82149	0.000444741	0.00978493	0.7852	4423	tags=50%, list=19%, signal=61%
YU_MYC_TARGETS_UP	YU_MYC_TARGETS_UP		40	0.587815	1.82121	0.000221729	0.00977258	0.7866	4092	tags=58%, list=17%, signal=70%
GRAHAM_NORMAL_QUIESCENT_VS_NORMAL_DIVIDING_DN	GRAHAM_NORMAL_QUIESCENT_VS_NORMAL_DIVIDING_DN		83	0.513195	1.81756	0	0.0101932	0.8015	4503	tags=48%, list=19%, signal=59%
OLSSON_E2F3_TARGETS_DN	OLSSON_E2F3_TARGETS_DN		42	0.580266	1.81187	0.000880088	0.0109109	0.824	3519	tags=48%, list=15%, signal=56%
COLIN_PILOCYTIC_ASTROCYTOMA_VS_GLIOBLASTOMA_DN	COLIN_PILOCYTIC_ASTROCYTOMA_VS_GLIOBLASTOMA_DN		28	0.629525	1.80755	0.00192431	0.0114476	0.8393	2663	tags=32%, list=11%, signal=36%
DAZARD_UV_RESPONSE_CLUSTER_G1	DAZARD_UV_RESPONSE_CLUSTER_G1		59	0.537391	1.80596	0	0.0116227	0.8447	3529	tags=49%, list=15%, signal=58%
ZHAN_VARIABLE_EARLY_DIFFERENTIATION_GENES_DN	ZHAN_VARIABLE_EARLY_DIFFERENTIATION_GENES_DN		29	0.621455	1.80594	0.00238095	0.011571	0.8448	6541	tags=72%, list=28%, signal=100%
KONG_E2F3_TARGETS	KONG_E2F3_TARGETS		94	0.49953	1.80509	0.000447127	0.01166	0.8481	6290	tags=63%, list=27%, signal=85%
DASU_IL6_SIGNALING_SCAR_DN	DASU_IL6_SIGNALING_SCAR_DN		15	0.730247	1.80491	0.00254453	0.0116291	0.8492	4361	tags=53%, list=19%, signal=65%
SERVITJA_LIVER_HNF1A_TARGETS_UP	SERVITJA_LIVER_HNF1A_TARGETS_UP		126	0.476369	1.80445	0	0.011654	0.851	4352	tags=40%, list=19%, signal=48%
GOLDRATH_HOMEOSTATIC_PROLIFERATION	GOLDRATH_HOMEOSTATIC_PROLIFERATION		158	0.462262	1.80113	0	0.0120771	0.8619	4080	tags=39%, list=17%, signal=46%
CAFFAREL_RESPONSE_TO_THC_24HR_5_UP	CAFFAREL_RESPONSE_TO_THC_24HR_5_UP		30	0.621338	1.80057	0.00191489	0.0121027	0.8641	2385	tags=40%, list=10%, signal=44%
LAIHO_COLORECTAL_CANCER_SERRATED_UP	LAIHO_COLORECTAL_CANCER_SERRATED_UP		101	0.490241	1.799	0	0.0122799	0.8694	4361	tags=46%, list=19%, signal=56%
NAM_FXYD5_TARGETS_DN	NAM_FXYD5_TARGETS_DN		18	0.695365	1.79777	0.00403997	0.0124024	0.8733	3656	tags=61%, list=16%, signal=72%
WATANABE_RECTAL_CANCER_RADIOTHERAPY_RESPONSIVE_UP	WATANABE_RECTAL_CANCER_RADIOTHERAPY_RESPONSIVE_UP		95	0.495149	1.7974	0.000228885	0.0124117	0.8744	3840	tags=42%, list=16%, signal=50%
CHUNG_BLISTER_CYTOTOXICITY_UP	CHUNG_BLISTER_CYTOTOXICITY_UP		117	0.476935	1.79715	0.0002331	0.0123999	0.8758	2847	tags=35%, list=12%, signal=40%
ALONSO_METASTASIS_NEURAL_UP	ALONSO_METASTASIS_NEURAL_UP		18	0.697949	1.79697	0.00296862	0.0123704	0.8764	3483	tags=44%, list=15%, signal=52%
GUTIERREZ_MULTIPLE_MYELOMA_UP	GUTIERREZ_MULTIPLE_MYELOMA_UP		30	0.615194	1.79618	0.00219443	0.0124326	0.8795	4878	tags=57%, list=21%, signal=71%
APPIERTO_RESPONSE_TO_FENRETINIDE_DN	APPIERTO_RESPONSE_TO_FENRETINIDE_DN		46	0.561159	1.78818	0.000661084	0.0136443	0.9042	2335	tags=41%, list=10%, signal=46%
HORIUCHI_WTAP_TARGETS_DN	HORIUCHI_WTAP_TARGETS_DN		287	0.427726	1.78559	0	0.013995	0.9108	5613	tags=49%, list=24%, signal=64%
IGLESIAS_E2F_TARGETS_UP	IGLESIAS_E2F_TARGETS_UP		141	0.463764	1.78536	0.000231535	0.0139667	0.9111	3883	tags=42%, list=17%, signal=50%
BARRIER_CANCER_RELAPSE_TUMOR_SAMPLE_UP	BARRIER_CANCER_RELAPSE_TUMOR_SAMPLE_UP		15	0.723977	1.78364	0.00399076	0.0142054	0.915	4340	tags=73%, list=19%, signal=90%
ZEMBUTSU_SENSITIVITY_TO_VINCRISTINE	ZEMBUTSU_SENSITIVITY_TO_VINCRISTINE		18	0.689608	1.78114	0.00343127	0.0145636	0.9223	3198	tags=44%, list=14%, signal=51%
WHITEFORD_PEDIATRIC_CANCER_MARKERS	WHITEFORD_PEDIATRIC_CANCER_MARKERS		114	0.474919	1.78007	0	0.0147068	0.9249	5589	tags=53%, list=24%, signal=69%
AMIT_EGF_RESPONSE_120_MCF10A	AMIT_EGF_RESPONSE_120_MCF10A		41	0.571847	1.77997	0.00195482	0.0146662	0.9252	3312	tags=37%, list=14%, signal=43%
KEGG_CARDIAC_MUSCLE_CONTRACTION	KEGG_CARDIAC_MUSCLE_CONTRACTION		72	0.512899	1.77797	0.00091638	0.0149346	0.929	4491	tags=47%, list=19%, signal=58%
MULLIGHAN_NPM1_MUTATED_SIGNATURE_2_DN	MULLIGHAN_NPM1_MUTATED_SIGNATURE_2_DN		72	0.511729	1.77732	0.000221141	0.0149871	0.9304	3149	tags=39%, list=13%, signal=45%
TOOKER_GEMCITABINE_RESISTANCE_UP	TOOKER_GEMCITABINE_RESISTANCE_UP		70	0.517306	1.77643	0.000225428	0.0150824	0.9325	3663	tags=46%, list=16%, signal=54%
MODY_HIPPOCAMPUS_POSTNATAL	MODY_HIPPOCAMPUS_POSTNATAL		59	0.529974	1.7756	0.000663717	0.0151596	0.9354	4032	tags=49%, list=17%, signal=59%
TONKS_TARGETS_OF_RUNX1_RUNX1T1_FUSION_GRANULOCYTE_DN	TONKS_TARGETS_OF_RUNX1_RUNX1T1_FUSION_GRANULOCYTE_DN		16	0.703337	1.77225	0.00357143	0.0156811	0.9428	1775	tags=50%, list=8%, signal=54%
BURTON_ADIPOGENESIS_PEAK_AT_16HR	BURTON_ADIPOGENESIS_PEAK_AT_16HR		38	0.574369	1.7686	0.00176095	0.0163066	0.9503	4011	tags=53%, list=17%, signal=63%
REACTOME_PREFOLDIN_MEDIATED_TRANSFER_OF_SUBSTRATE_TO_CCT_TRIC	REACTOME_PREFOLDIN_MEDIATED_TRANSFER_OF_SUBSTRATE_TO_CCT_TRIC		24	0.639057	1.76446	0.00321199	0.0170275	0.9574	2992	tags=58%, list=13%, signal=67%
KAAB_FAILED_HEART_ATRIUM_DN	KAAB_FAILED_HEART_ATRIUM_DN		130	0.462964	1.76267	0	0.0173184	0.9599	4896	tags=51%, list=21%, signal=64%
BURTON_ADIPOGENESIS_3	BURTON_ADIPOGENESIS_3		98	0.481179	1.76144	0	0.0174752	0.9616	4961	tags=50%, list=21%, signal=63%
FISCHER_G2_M_CELL_CYCLE	FISCHER_G2_M_CELL_CYCLE		215	0.435703	1.76037	0	0.0176205	0.9634	5260	tags=47%, list=22%, signal=59%
KANG_DOXORUBICIN_RESISTANCE_UP	KANG_DOXORUBICIN_RESISTANCE_UP		50	0.54549	1.75998	0.00195143	0.0176272	0.9637	4916	tags=58%, list=21%, signal=73%
ABRAMSON_INTERACT_WITH_AIRE	ABRAMSON_INTERACT_WITH_AIRE		42	0.562826	1.75943	0.00152872	0.0176633	0.9642	3852	tags=45%, list=16%, signal=54%
REACTOME_MRNA_PROCESSING	REACTOME_MRNA_PROCESSING		151	0.455602	1.75879	0	0.0177276	0.9653	5158	tags=46%, list=22%, signal=58%
HOLLEMAN_ASPARAGINASE_RESISTANCE_B_ALL_UP	HOLLEMAN_ASPARAGINASE_RESISTANCE_B_ALL_UP		26	0.619663	1.75772	0.00236559	0.017863	0.9663	3997	tags=62%, list=17%, signal=74%
YAO_TEMPORAL_RESPONSE_TO_PROGESTERONE_CLUSTER_7	YAO_TEMPORAL_RESPONSE_TO_PROGESTERONE_CLUSTER_7		68	0.511423	1.75717	0.000224165	0.0178912	0.9664	5126	tags=50%, list=22%, signal=64%
ZUCCHI_METASTASIS_UP	ZUCCHI_METASTASIS_UP		38	0.571764	1.75652	0.0021645	0.0179519	0.967	2366	tags=45%, list=10%, signal=50%
REACTOME_FORMATION_OF_TUBULIN_FOLDING_INTERMEDIATES_BY_CCT_TRIC	REACTOME_FORMATION_OF_TUBULIN_FOLDING_INTERMEDIATES_BY_CCT_TRIC		19	0.672312	1.75499	0.00586756	0.0181867	0.9693	2992	tags=68%, list=13%, signal=78%
CHANG_CORE_SERUM_RESPONSE_UP	CHANG_CORE_SERUM_RESPONSE_UP		201	0.437267	1.75446	0	0.0182197	0.9696	4860	tags=45%, list=21%, signal=56%
SWEET_KRAS_ONCOGENIC_SIGNATURE	SWEET_KRAS_ONCOGENIC_SIGNATURE		85	0.489938	1.75351	0	0.0183442	0.9707	4478	tags=48%, list=19%, signal=59%
JOSEPH_RESPONSE_TO_SODIUM_BUTYRATE_UP	JOSEPH_RESPONSE_TO_SODIUM_BUTYRATE_UP		29	0.602742	1.74909	0.00373873	0.0192149	0.9762	4426	tags=52%, list=19%, signal=64%
GRADE_COLON_AND_RECTAL_CANCER_UP	GRADE_COLON_AND_RECTAL_CANCER_UP		267	0.421618	1.74841	0	0.0192912	0.9769	3961	tags=38%, list=17%, signal=45%
LU_EZH2_TARGETS_UP	LU_EZH2_TARGETS_UP		234	0.42629	1.74626	0	0.019692	0.9784	5229	tags=41%, list=22%, signal=52%
HILLION_HMGA1_TARGETS	HILLION_HMGA1_TARGETS		86	0.488389	1.74605	0	0.0196599	0.9785	3967	tags=42%, list=17%, signal=50%
AMIT_SERUM_RESPONSE_20_MCF10A	AMIT_SERUM_RESPONSE_20_MCF10A		20	0.654373	1.74207	0.00444915	0.0204891	0.9808	4093	tags=45%, list=17%, signal=54%
HILLION_HMGA1B_TARGETS	HILLION_HMGA1B_TARGETS		88	0.484207	1.73944	0.000226193	0.0210389	0.9832	4241	tags=44%, list=18%, signal=54%
CAFFAREL_RESPONSE_TO_THC_24HR_5_DN	CAFFAREL_RESPONSE_TO_THC_24HR_5_DN		53	0.529313	1.73832	0.00178213	0.0212437	0.9842	5091	tags=55%, list=22%, signal=70%
REACTOME_PROTEIN_FOLDING	REACTOME_PROTEIN_FOLDING		48	0.539543	1.7352	0.00132275	0.0219132	0.9854	3218	tags=46%, list=14%, signal=53%
DE_YY1_TARGETS_UP	DE_YY1_TARGETS_UP		19	0.660329	1.7346	0.00490614	0.021976	0.9858	5495	tags=68%, list=23%, signal=89%
WHITFIELD_CELL_CYCLE_G2_M	WHITFIELD_CELL_CYCLE_G2_M		203	0.430041	1.73328	0	0.0222035	0.9861	5411	tags=45%, list=23%, signal=58%
JUBAN_TARGETS_OF_SPI1_AND_FLI1_DN	JUBAN_TARGETS_OF_SPI1_AND_FLI1_DN		85	0.483351	1.73253	0.000670391	0.0222919	0.9869	3808	tags=44%, list=16%, signal=52%
KEGG_GLYCOLYSIS_GLUCONEOGENESIS	KEGG_GLYCOLYSIS_GLUCONEOGENESIS		54	0.525095	1.7314	0.00219491	0.0224868	0.9879	3153	tags=33%, list=13%, signal=38%
GOLUB_ALL_VS_AML_DN	GOLUB_ALL_VS_AML_DN		22	0.635136	1.73131	0.00620188	0.0224289	0.9879	4082	tags=50%, list=17%, signal=60%
REACTOME_PYRUVATE_METABOLISM_AND_CITRIC_ACID_TCA_CYCLE	REACTOME_PYRUVATE_METABOLISM_AND_CITRIC_ACID_TCA_CYCLE		39	0.560069	1.7312	0.00265252	0.0223745	0.988	3164	tags=51%, list=14%, signal=59%
SMID_BREAST_CANCER_LUMINAL_A_DN	SMID_BREAST_CANCER_LUMINAL_A_DN		18	0.668911	1.73052	0.00734817	0.0224862	0.9886	4122	tags=50%, list=18%, signal=61%
YAMAZAKI_TCEB3_TARGETS_DN	YAMAZAKI_TCEB3_TARGETS_DN		199	0.430215	1.73013	0	0.0225049	0.9887	4258	tags=38%, list=18%, signal=46%
KEGG_GLYOXYLATE_AND_DICARBOXYLATE_METABOLISM	KEGG_GLYOXYLATE_AND_DICARBOXYLATE_METABOLISM		16	0.685928	1.72995	0.00704526	0.0224635	0.9887	2812	tags=44%, list=12%, signal=50%
ONKEN_UVEAL_MELANOMA_DN	ONKEN_UVEAL_MELANOMA_DN		484	0.39509	1.72811	0	0.0228391	0.9897	3887	tags=34%, list=17%, signal=40%
PUIFFE_INVASION_INHIBITED_BY_ASCITES_UP	PUIFFE_INVASION_INHIBITED_BY_ASCITES_UP		75	0.494437	1.72638	0.000660357	0.0231963	0.991	4092	tags=47%, list=17%, signal=56%
WHITFIELD_CELL_CYCLE_LITERATURE	WHITFIELD_CELL_CYCLE_LITERATURE		44	0.545699	1.72638	0.0013052	0.0231116	0.991	2388	tags=41%, list=10%, signal=45%
FLECHNER_PBL_KIDNEY_TRANSPLANT_OK_VS_DONOR_UP	FLECHNER_PBL_KIDNEY_TRANSPLANT_OK_VS_DONOR_UP		140	0.447126	1.72516	0	0.0233329	0.9916	4529	tags=42%, list=19%, signal=52%
OXFORD_RALA_OR_RALB_TARGETS_UP	OXFORD_RALA_OR_RALB_TARGETS_UP		48	0.535548	1.72465	0.00239651	0.0233668	0.9918	3986	tags=44%, list=17%, signal=53%
RAGHAVACHARI_PLATELET_SPECIFIC_GENES	RAGHAVACHARI_PLATELET_SPECIFIC_GENES		66	0.504102	1.72354	0.00111284	0.0235513	0.9929	3611	tags=41%, list=15%, signal=48%
BILANGES_SERUM_RESPONSE_TRANSLATION	BILANGES_SERUM_RESPONSE_TRANSLATION		36	0.567096	1.72268	0.00351571	0.0236722	0.9932	4921	tags=61%, list=21%, signal=77%
HASLINGER_B_CLL_WITH_6Q21_DELETION	HASLINGER_B_CLL_WITH_6Q21_DELETION		16	0.687362	1.72124	0.00783069	0.0239688	0.9938	1406	tags=38%, list=6%, signal=40%
SCHLOSSER_SERUM_RESPONSE_AUGMENTED_BY_MYC	SCHLOSSER_SERUM_RESPONSE_AUGMENTED_BY_MYC		95	0.472439	1.7201	0.000450857	0.0241687	0.9942	4441	tags=44%, list=19%, signal=54%
WELCSH_BRCA1_TARGETS_DN	WELCSH_BRCA1_TARGETS_DN		138	0.447606	1.71873	0	0.0244386	0.9946	4521	tags=38%, list=19%, signal=47%
PAL_PRMT5_TARGETS_UP	PAL_PRMT5_TARGETS_UP		194	0.428278	1.71689	0	0.0248463	0.9949	4128	tags=38%, list=18%, signal=46%
LI_WILMS_TUMOR_ANAPLASTIC_UP	LI_WILMS_TUMOR_ANAPLASTIC_UP		19	0.651815	1.71437	0.00745633	0.0254295	0.9962	6303	tags=79%, list=27%, signal=108%
REACTOME_SIGNALING_BY_THE_B_CELL_RECEPTOR_BCR	REACTOME_SIGNALING_BY_THE_B_CELL_RECEPTOR_BCR		119	0.456615	1.71181	0	0.0260782	0.9967	3743	tags=42%, list=16%, signal=50%
FUJII_YBX1_TARGETS_DN	FUJII_YBX1_TARGETS_DN		190	0.427946	1.71031	0.000238777	0.0263915	0.9967	4770	tags=42%, list=20%, signal=52%
CAIRO_PML_TARGETS_BOUND_BY_MYC_UP	CAIRO_PML_TARGETS_BOUND_BY_MYC_UP		22	0.626176	1.70946	0.00768246	0.0265269	0.9969	981	tags=23%, list=4%, signal=24%
LUI_THYROID_CANCER_CLUSTER_1	LUI_THYROID_CANCER_CLUSTER_1		48	0.528687	1.70905	0.00378872	0.0265481	0.9971	4115	tags=35%, list=18%, signal=43%
FRASOR_RESPONSE_TO_SERM_OR_FULVESTRANT_DN	FRASOR_RESPONSE_TO_SERM_OR_FULVESTRANT_DN		50	0.525806	1.70828	0.00246085	0.0266742	0.9973	4239	tags=44%, list=18%, signal=54%
ZHU_CMV_24_HR_UP	ZHU_CMV_24_HR_UP		87	0.478298	1.70662	0.000680272	0.0270605	0.9977	4128	tags=46%, list=18%, signal=56%
KEGG_FATTY_ACID_METABOLISM	KEGG_FATTY_ACID_METABOLISM		35	0.563257	1.70625	0.00282916	0.0270809	0.9978	4141	tags=40%, list=18%, signal=49%
GOLUB_ALL_VS_AML_UP	GOLUB_ALL_VS_AML_UP		23	0.623599	1.70366	0.00607771	0.0277374	0.998	3067	tags=43%, list=13%, signal=50%
LIANG_HEMATOPOIESIS_STEM_CELL_NUMBER_LARGE_VS_TINY_UP	LIANG_HEMATOPOIESIS_STEM_CELL_NUMBER_LARGE_VS_TINY_UP		40	0.550475	1.70342	0.00416028	0.027708	0.998	5534	tags=60%, list=24%, signal=78%
UDAYAKUMAR_MED1_TARGETS_UP	UDAYAKUMAR_MED1_TARGETS_UP		126	0.449491	1.70323	0.000233263	0.0276695	0.998	2003	tags=25%, list=9%, signal=27%
PID_PLK1_PATHWAY	PID_PLK1_PATHWAY		45	0.537133	1.70216	0.00283348	0.0278899	0.998	4483	tags=47%, list=19%, signal=58%
PARK_HSC_AND_MULTIPOTENT_PROGENITORS	PARK_HSC_AND_MULTIPOTENT_PROGENITORS		42	0.54402	1.70169	0.00265722	0.0279408	0.998	2919	tags=40%, list=12%, signal=46%
MOOTHA_FFA_OXYDATION	MOOTHA_FFA_OXYDATION		22	0.628614	1.70164	0.00775528	0.0278624	0.998	4141	tags=45%, list=18%, signal=55%
TONG_INTERACT_WITH_PTTG1	TONG_INTERACT_WITH_PTTG1		49	0.526119	1.70099	0.0022237	0.0279439	0.9982	5437	tags=59%, list=23%, signal=77%
KEGG_PROTEIN_EXPORT	KEGG_PROTEIN_EXPORT		22	0.627671	1.69977	0.00757895	0.0282124	0.9983	3932	tags=55%, list=17%, signal=65%
PUJANA_XPRSS_INT_NETWORK	PUJANA_XPRSS_INT_NETWORK		157	0.435645	1.69924	0	0.0282695	0.9983	6188	tags=49%, list=26%, signal=66%
FURUKAWA_DUSP6_TARGETS_PCI35_DN	FURUKAWA_DUSP6_TARGETS_PCI35_DN		66	0.495067	1.69858	0.00176018	0.0283653	0.9984	4961	tags=48%, list=21%, signal=61%
KEGG_VALINE_LEUCINE_AND_ISOLEUCINE_DEGRADATION	KEGG_VALINE_LEUCINE_AND_ISOLEUCINE_DEGRADATION		42	0.544255	1.69666	0.00335046	0.0288441	0.9987	5345	tags=50%, list=23%, signal=65%
SCHEIDEREIT_IKK_TARGETS	SCHEIDEREIT_IKK_TARGETS		17	0.666517	1.6952	0.00906599	0.0291833	0.9989	915	tags=24%, list=4%, signal=24%
NAKAMURA_TUMOR_ZONE_PERIPHERAL_VS_CENTRAL_UP	NAKAMURA_TUMOR_ZONE_PERIPHERAL_VS_CENTRAL_UP		253	0.409504	1.69341	0	0.0296046	0.9989	4533	tags=44%, list=19%, signal=54%
MORI_SMALL_PRE_BII_LYMPHOCYTE_DN	MORI_SMALL_PRE_BII_LYMPHOCYTE_DN		74	0.484073	1.69246	0.000229727	0.0297873	0.9989	2904	tags=38%, list=12%, signal=43%
LINDGREN_BLADDER_CANCER_CLUSTER_3_UP	LINDGREN_BLADDER_CANCER_CLUSTER_3_UP		295	0.40414	1.69104	0	0.0301447	0.999	5333	tags=44%, list=23%, signal=57%
SAKAI_TUMOR_INFILTRATING_MONOCYTES_DN	SAKAI_TUMOR_INFILTRATING_MONOCYTES_DN		73	0.485817	1.69069	0.000675371	0.0301549	0.999	5224	tags=51%, list=22%, signal=65%
LY_AGING_MIDDLE_DN	LY_AGING_MIDDLE_DN		16	0.671782	1.68698	0.00971922	0.0312111	0.9993	1623	tags=50%, list=7%, signal=54%
SASAKI_ADULT_T_CELL_LEUKEMIA	SASAKI_ADULT_T_CELL_LEUKEMIA		163	0.429965	1.68584	0.000475285	0.0314455	0.9993	3377	tags=36%, list=14%, signal=41%
FERREIRA_EWINGS_SARCOMA_UNSTABLE_VS_STABLE_UP	FERREIRA_EWINGS_SARCOMA_UNSTABLE_VS_STABLE_UP		152	0.43303	1.68546	0	0.0314693	0.9993	4978	tags=41%, list=21%, signal=52%
HASLINGER_B_CLL_WITH_13Q14_DELETION	HASLINGER_B_CLL_WITH_13Q14_DELETION		21	0.626037	1.68526	0.00965251	0.0314307	0.9993	984	tags=24%, list=4%, signal=25%
SHEDDEN_LUNG_CANCER_POOR_SURVIVAL_A6	SHEDDEN_LUNG_CANCER_POOR_SURVIVAL_A6		422	0.389776	1.68511	0	0.0313737	0.9993	5195	tags=42%, list=22%, signal=53%
GNATENKO_PLATELET_SIGNATURE	GNATENKO_PLATELET_SIGNATURE		39	0.542575	1.68433	0.00410101	0.0315185	0.9993	3611	tags=44%, list=15%, signal=51%
REACTOME_RNA_POL_II_TRANSCRIPTION	REACTOME_RNA_POL_II_TRANSCRIPTION		91	0.465846	1.68165	0.00068089	0.0322618	0.9994	4894	tags=47%, list=21%, signal=60%
KOBAYASHI_EGFR_SIGNALING_24HR_DN	KOBAYASHI_EGFR_SIGNALING_24HR_DN		239	0.411496	1.68152	0	0.0321997	0.9994	4503	tags=41%, list=19%, signal=50%
REACTOME_SMOOTH_MUSCLE_CONTRACTION	REACTOME_SMOOTH_MUSCLE_CONTRACTION		23	0.613103	1.68084	0.00876256	0.0323211	0.9995	2562	tags=39%, list=11%, signal=44%
BIOCARTA_DC_PATHWAY	BIOCARTA_DC_PATHWAY		22	0.62296	1.68057	0.00792291	0.0323131	0.9995	504	tags=23%, list=2%, signal=23%
NATSUME_RESPONSE_TO_INTERFERON_BETA_DN	NATSUME_RESPONSE_TO_INTERFERON_BETA_DN		48	0.518907	1.67826	0.00323974	0.0329616	0.9995	3948	tags=50%, list=17%, signal=60%
PUJANA_BRCA2_PCC_NETWORK	PUJANA_BRCA2_PCC_NETWORK		389	0.389927	1.67748	0	0.0331092	0.9995	5147	tags=39%, list=22%, signal=49%
ENK_UV_RESPONSE_KERATINOCYTE_UP	ENK_UV_RESPONSE_KERATINOCYTE_UP		495	0.383336	1.67572	0	0.0335952	0.9995	4542	tags=37%, list=19%, signal=45%
HEDENFALK_BREAST_CANCER_BRCA1_VS_BRCA2	HEDENFALK_BREAST_CANCER_BRCA1_VS_BRCA2		153	0.430446	1.67275	0	0.0344986	0.9997	4013	tags=36%, list=17%, signal=43%
ZHANG_BREAST_CANCER_PROGENITORS_UP	ZHANG_BREAST_CANCER_PROGENITORS_UP		381	0.389243	1.66851	0	0.0358572	0.9998	5015	tags=39%, list=21%, signal=49%
BIDUS_METASTASIS_UP	BIDUS_METASTASIS_UP		202	0.413189	1.66805	0.000245761	0.0359032	0.9998	3986	tags=35%, list=17%, signal=41%
WEST_ADRENOCORTICAL_TUMOR_UP	WEST_ADRENOCORTICAL_TUMOR_UP		276	0.400966	1.66539	0	0.0367758	0.9999	5916	tags=44%, list=25%, signal=58%
WENG_POR_TARGETS_GLOBAL_UP	WENG_POR_TARGETS_GLOBAL_UP		15	0.670982	1.66126	0.0139342	0.0381097	0.9999	3912	tags=40%, list=17%, signal=48%
KEGG_BASE_EXCISION_REPAIR	KEGG_BASE_EXCISION_REPAIR		33	0.557767	1.66122	0.00865801	0.0380113	0.9999	2481	tags=36%, list=11%, signal=41%
BIOCARTA_NDKDYNAMIN_PATHWAY	BIOCARTA_NDKDYNAMIN_PATHWAY		18	0.643178	1.6599	0.0144129	0.0384061	0.9999	4148	tags=61%, list=18%, signal=74%
ALFANO_MYC_TARGETS	ALFANO_MYC_TARGETS		227	0.407435	1.6591	0	0.0385936	0.9999	3876	tags=33%, list=17%, signal=39%
BLUM_RESPONSE_TO_SALIRASIB_DN	BLUM_RESPONSE_TO_SALIRASIB_DN		328	0.391648	1.65723	0	0.0391964	0.9999	4517	tags=39%, list=19%, signal=48%
BARRIER_COLON_CANCER_RECURRENCE_UP	BARRIER_COLON_CANCER_RECURRENCE_UP		42	0.528467	1.65605	0.00394304	0.0395328	0.9999	5546	tags=55%, list=24%, signal=72%
BARIS_THYROID_CANCER_UP	BARIS_THYROID_CANCER_UP		23	0.601174	1.65559	0.011578	0.0395755	0.9999	5567	tags=61%, list=24%, signal=80%
PUJANA_BRCA_CENTERED_NETWORK	PUJANA_BRCA_CENTERED_NETWORK		114	0.443599	1.65555	0.000691722	0.0394727	0.9999	5984	tags=50%, list=26%, signal=67%
BYSTROEM_CORRELATED_WITH_IL5_UP	BYSTROEM_CORRELATED_WITH_IL5_UP		50	0.509343	1.65548	0.0037669	0.0393857	0.9999	3950	tags=42%, list=17%, signal=50%
WANG_TARGETS_OF_MLL_CBP_FUSION_DN	WANG_TARGETS_OF_MLL_CBP_FUSION_DN		43	0.525429	1.65461	0.00505383	0.0395781	0.9999	4935	tags=53%, list=21%, signal=68%
GOTZMANN_EPITHELIAL_TO_MESENCHYMAL_TRANSITION_DN	GOTZMANN_EPITHELIAL_TO_MESENCHYMAL_TRANSITION_DN		196	0.413027	1.65354	0	0.0398728	1	4553	tags=42%, list=19%, signal=51%
PID_DNA_PK_PATHWAY	PID_DNA_PK_PATHWAY		16	0.654308	1.65085	0.0145431	0.04077	1	2202	tags=44%, list=9%, signal=48%
FLECHNER_BIOPSY_KIDNEY_TRANSPLANT_REJECTED_VS_OK_DN	FLECHNER_BIOPSY_KIDNEY_TRANSPLANT_REJECTED_VS_OK_DN		497	0.376495	1.6504	0	0.0408159	1	4542	tags=36%, list=19%, signal=43%
MATTIOLI_MGUS_VS_PCL	MATTIOLI_MGUS_VS_PCL		95	0.453792	1.64877	0.000914495	0.04134	1	1784	tags=32%, list=8%, signal=34%
PENG_GLUCOSE_DEPRIVATION_DN	PENG_GLUCOSE_DEPRIVATION_DN		157	0.423328	1.64781	0.000236463	0.0415858	1	4878	tags=41%, list=21%, signal=51%
ACOSTA_PROLIFERATION_INDEPENDENT_MYC_TARGETS_UP	ACOSTA_PROLIFERATION_INDEPENDENT_MYC_TARGETS_UP		75	0.473212	1.64683	0.00314536	0.0418548	1	3983	tags=40%, list=17%, signal=48%
REACTOME_CLEAVAGE_OF_GROWING_TRANSCRIPT_IN_THE_TERMINATION_REGION_	REACTOME_CLEAVAGE_OF_GROWING_TRANSCRIPT_IN_THE_TERMINATION_REGION_		41	0.528021	1.64584	0.00424297	0.0421367	1	4894	tags=54%, list=21%, signal=68%
REACTOME_PROCESSING_OF_CAPPED_INTRONLESS_PRE_MRNA	REACTOME_PROCESSING_OF_CAPPED_INTRONLESS_PRE_MRNA		22	0.607482	1.64504	0.0101337	0.0423479	1	4894	tags=64%, list=21%, signal=80%
BHATI_G2M_ARREST_BY_2METHOXYESTRADIOL_DN	BHATI_G2M_ARREST_BY_2METHOXYESTRADIOL_DN		110	0.440349	1.64437	0.000228519	0.0425091	1	5410	tags=43%, list=23%, signal=55%
REACTOME_ANTIGEN_PROCESSING_UBIQUITINATION_PROTEASOME_DEGRADATION	REACTOME_ANTIGEN_PROCESSING_UBIQUITINATION_PROTEASOME_DEGRADATION		195	0.408848	1.64078	0	0.043863	1	4327	tags=38%, list=18%, signal=47%
SARRIO_EPITHELIAL_MESENCHYMAL_TRANSITION_UP	SARRIO_EPITHELIAL_MESENCHYMAL_TRANSITION_UP		164	0.418496	1.64013	0.000473261	0.0440014	1	4483	tags=42%, list=19%, signal=52%
KYNG_ENVIRONMENTAL_STRESS_RESPONSE_UP	KYNG_ENVIRONMENTAL_STRESS_RESPONSE_UP		52	0.502993	1.63969	0.00676708	0.0440677	1	5922	tags=50%, list=25%, signal=67%
NIELSEN_GIST	NIELSEN_GIST		86	0.457275	1.63882	0.00159635	0.0443083	1	3541	tags=38%, list=15%, signal=45%
KEGG_OOCYTE_MEIOSIS	KEGG_OOCYTE_MEIOSIS		104	0.44405	1.63768	0	0.0446688	1	4328	tags=41%, list=18%, signal=50%
ELLWOOD_MYC_TARGETS_DN	ELLWOOD_MYC_TARGETS_DN		35	0.542997	1.63759	0.011236	0.0445689	1	3957	tags=49%, list=17%, signal=58%
CONCANNON_APOPTOSIS_BY_EPOXOMICIN_DN	CONCANNON_APOPTOSIS_BY_EPOXOMICIN_DN		154	0.419707	1.63756	0	0.0444545	1	4195	tags=44%, list=18%, signal=53%
WEIGEL_OXIDATIVE_STRESS_BY_TBH_AND_H2O2	WEIGEL_OXIDATIVE_STRESS_BY_TBH_AND_H2O2		33	0.552403	1.6371	0.00809274	0.0445201	1	2893	tags=36%, list=12%, signal=41%
SESTO_RESPONSE_TO_UV_C7	SESTO_RESPONSE_TO_UV_C7		62	0.485147	1.63642	0.00290698	0.0446575	1	3765	tags=42%, list=16%, signal=50%
REACTOME_RESOLUTION_OF_AP_SITES_VIA_THE_MULTIPLE_NUCLEOTIDE_PATCH_REPLACEMENT_PATHWAY	REACTOME_RESOLUTION_OF_AP_SITES_VIA_THE_MULTIPLE_NUCLEOTIDE_PATCH_REPLACEMENT_PATHWAY		17	0.641319	1.63578	0.0175702	0.0447989	1	2407	tags=35%, list=10%, signal=39%
ODONNELL_TARGETS_OF_MYC_AND_TFRC_DN	ODONNELL_TARGETS_OF_MYC_AND_TFRC_DN		42	0.522452	1.63514	0.00822405	0.0449152	1	5515	tags=52%, list=24%, signal=68%
KESHELAVA_MULTIPLE_DRUG_RESISTANCE	KESHELAVA_MULTIPLE_DRUG_RESISTANCE		70	0.471976	1.63476	0.00178611	0.044948	1	3665	tags=43%, list=16%, signal=51%
REACTOME_ASSOCIATION_OF_TRIC_CCT_WITH_TARGET_PROTEINS_DURING_BIOSYNTHESIS	REACTOME_ASSOCIATION_OF_TRIC_CCT_WITH_TARGET_PROTEINS_DURING_BIOSYNTHESIS		26	0.578083	1.63276	0.0103093	0.0456501	1	4320	tags=54%, list=18%, signal=66%
AGUIRRE_PANCREATIC_CANCER_COPY_NUMBER_UP	AGUIRRE_PANCREATIC_CANCER_COPY_NUMBER_UP		263	0.393673	1.63047	0	0.0465097	1	5181	tags=41%, list=22%, signal=52%
BIOCARTA_MPR_PATHWAY	BIOCARTA_MPR_PATHWAY		32	0.549337	1.63037	0.00898973	0.0464241	1	5640	tags=59%, list=24%, signal=78%
MANALO_HYPOXIA_DN	MANALO_HYPOXIA_DN		274	0.391322	1.63025	0	0.0463373	1	5214	tags=40%, list=22%, signal=51%
REACTOME_CLASS_I_MHC_MEDIATED_ANTIGEN_PROCESSING_PRESENTATION	REACTOME_CLASS_I_MHC_MEDIATED_ANTIGEN_PROCESSING_PRESENTATION		225	0.399668	1.63022	0	0.0462302	1	4327	tags=38%, list=18%, signal=46%
REACTOME_THE_ROLE_OF_NEF_IN_HIV1_REPLICATION_AND_DISEASE_PATHOGENESIS	REACTOME_THE_ROLE_OF_NEF_IN_HIV1_REPLICATION_AND_DISEASE_PATHOGENESIS		25	0.581913	1.62897	0.014112	0.0466373	1	2310	tags=36%, list=10%, signal=40%
SWEET_LUNG_CANCER_KRAS_UP	SWEET_LUNG_CANCER_KRAS_UP		453	0.374587	1.62873	0	0.0466077	1	3906	tags=34%, list=17%, signal=40%
CHANG_CYCLING_GENES	CHANG_CYCLING_GENES		135	0.425457	1.6287	0.00140713	0.0464909	1	4260	tags=44%, list=18%, signal=54%
MAGRANGEAS_MULTIPLE_MYELOMA_IGG_VS_IGA_UP	MAGRANGEAS_MULTIPLE_MYELOMA_IGG_VS_IGA_UP		19	0.624791	1.62806	0.0151155	0.046641	1	3671	tags=53%, list=16%, signal=62%
KORKOLA_YOLK_SAC_TUMOR_UP	KORKOLA_YOLK_SAC_TUMOR_UP		20	0.610224	1.62728	0.0175208	0.0468438	1	1721	tags=40%, list=7%, signal=43%
GAZDA_DIAMOND_BLACKFAN_ANEMIA_PROGENITOR_DN	GAZDA_DIAMOND_BLACKFAN_ANEMIA_PROGENITOR_DN		60	0.484257	1.62707	0.00403226	0.0468101	1	3126	tags=35%, list=13%, signal=40%
CHICAS_RB1_TARGETS_LOW_SERUM	CHICAS_RB1_TARGETS_LOW_SERUM		74	0.467217	1.62471	0.00360117	0.0476892	1	3851	tags=43%, list=16%, signal=52%
REACTOME_MHC_CLASS_II_ANTIGEN_PRESENTATION	REACTOME_MHC_CLASS_II_ANTIGEN_PRESENTATION		75	0.465162	1.62307	0.00244011	0.0482945	1	5040	tags=45%, list=22%, signal=58%
BIOCARTA_CHREBP2_PATHWAY	BIOCARTA_CHREBP2_PATHWAY		40	0.52305	1.62235	0.00688468	0.0484774	1	4824	tags=52%, list=21%, signal=66%
REICHERT_MITOSIS_LIN9_TARGETS	REICHERT_MITOSIS_LIN9_TARGETS		28	0.560489	1.62133	0.0116555	0.0488028	1	4916	tags=46%, list=21%, signal=59%
CAFFAREL_RESPONSE_TO_THC_UP	CAFFAREL_RESPONSE_TO_THC_UP		30	0.552962	1.62057	0.011178	0.0490404	1	1278	tags=23%, list=5%, signal=25%
LUI_THYROID_CANCER_PAX8_PPARG_UP	LUI_THYROID_CANCER_PAX8_PPARG_UP		39	0.527695	1.62049	0.00707965	0.0489429	1	4047	tags=36%, list=17%, signal=43%
KEGG_GLYCOSPHINGOLIPID_BIOSYNTHESIS_LACTO_AND_NEOLACTO_SERIES	KEGG_GLYCOSPHINGOLIPID_BIOSYNTHESIS_LACTO_AND_NEOLACTO_SERIES		23	0.582058	1.61389	0.0129471	0.0518508	1	2674	tags=39%, list=11%, signal=44%
WOOD_EBV_EBNA1_TARGETS_DN	WOOD_EBV_EBNA1_TARGETS_DN		42	0.512256	1.6093	0.00937636	0.0538922	1	5625	tags=48%, list=24%, signal=63%
KYNG_DNA_DAMAGE_DN	KYNG_DNA_DAMAGE_DN		180	0.40546	1.60843	0.000476872	0.0541661	1	5126	tags=37%, list=22%, signal=47%
SESTO_RESPONSE_TO_UV_C0	SESTO_RESPONSE_TO_UV_C0		103	0.439018	1.60792	0.0020436	0.0542703	1	4469	tags=36%, list=19%, signal=44%
COLLER_MYC_TARGETS_UP	COLLER_MYC_TARGETS_UP		24	0.580297	1.60762	0.0148778	0.0542908	1	5095	tags=46%, list=22%, signal=59%
LI_WILMS_TUMOR_VS_FETAL_KIDNEY_1_DN	LI_WILMS_TUMOR_VS_FETAL_KIDNEY_1_DN		156	0.412288	1.60672	0.000462214	0.0545917	1	5095	tags=46%, list=22%, signal=58%
LE_EGR2_TARGETS_UP	LE_EGR2_TARGETS_UP		104	0.434548	1.60572	0.0006876	0.0549241	1	5126	tags=54%, list=22%, signal=69%
FLECHNER_PBL_KIDNEY_TRANSPLANT_REJECTED_VS_OK_UP	FLECHNER_PBL_KIDNEY_TRANSPLANT_REJECTED_VS_OK_UP		61	0.475067	1.60436	0.00401696	0.055469	1	2534	tags=30%, list=11%, signal=33%
SHETH_LIVER_CANCER_VS_TXNIP_LOSS_PAM1	SHETH_LIVER_CANCER_VS_TXNIP_LOSS_PAM1		216	0.396019	1.60415	0.000493583	0.055439	1	4017	tags=37%, list=17%, signal=44%
MMS_MOUSE_LYMPH_HIGH_4HRS_UP	MMS_MOUSE_LYMPH_HIGH_4HRS_UP		34	0.534804	1.6041	0.0120197	0.0553163	1	6240	tags=56%, list=27%, signal=76%
CHAUHAN_RESPONSE_TO_METHOXYESTRADIOL_UP	CHAUHAN_RESPONSE_TO_METHOXYESTRADIOL_UP		48	0.496886	1.60184	0.00750883	0.0562684	1	5227	tags=56%, list=22%, signal=72%
OSMAN_BLADDER_CANCER_DN	OSMAN_BLADDER_CANCER_DN		332	0.378414	1.60114	0	0.0564779	1	3872	tags=32%, list=17%, signal=38%
SCIAN_CELL_CYCLE_TARGETS_OF_TP53_AND_TP73_DN	SCIAN_CELL_CYCLE_TARGETS_OF_TP53_AND_TP73_DN		22	0.587329	1.59926	0.0185145	0.0572984	1	5515	tags=68%, list=24%, signal=89%
HAHTOLA_MYCOSIS_FUNGOIDES_SKIN_UP	HAHTOLA_MYCOSIS_FUNGOIDES_SKIN_UP		165	0.405986	1.59853	0.000948317	0.0575378	1	3640	tags=34%, list=16%, signal=40%
REACTOME_MITOTIC_PROMETAPHASE	REACTOME_MITOTIC_PROMETAPHASE		85	0.446998	1.59752	0.00312709	0.0579074	1	6310	tags=53%, list=27%, signal=72%
JIANG_AGING_CEREBRAL_CORTEX_DN	JIANG_AGING_CEREBRAL_CORTEX_DN		52	0.487279	1.5972	0.00640459	0.0579184	1	5182	tags=54%, list=22%, signal=69%
KAUFFMANN_MELANOMA_RELAPSE_UP	KAUFFMANN_MELANOMA_RELAPSE_UP		58	0.477282	1.59639	0.00712378	0.0581638	1	4797	tags=41%, list=20%, signal=52%
REACTOME_BASE_EXCISION_REPAIR	REACTOME_BASE_EXCISION_REPAIR		19	0.607882	1.59312	0.0209968	0.0596826	1	2407	tags=32%, list=10%, signal=35%
MAINA_VHL_TARGETS_DN	MAINA_VHL_TARGETS_DN		17	0.629353	1.59204	0.0247462	0.0600934	1	3442	tags=35%, list=15%, signal=41%
ACEVEDO_LIVER_CANCER_WITH_H3K9ME3_DN	ACEVEDO_LIVER_CANCER_WITH_H3K9ME3_DN		90	0.443053	1.59155	0.00272418	0.0601993	1	4150	tags=33%, list=18%, signal=40%
WU_APOPTOSIS_BY_CDKN1A_VIA_TP53	WU_APOPTOSIS_BY_CDKN1A_VIA_TP53		53	0.481401	1.59022	0.00961109	0.0607389	1	5126	tags=49%, list=22%, signal=63%
ZHONG_RESPONSE_TO_AZACITIDINE_AND_TSA_DN	ZHONG_RESPONSE_TO_AZACITIDINE_AND_TSA_DN		59	0.474473	1.59017	0.00552242	0.0606126	1	5915	tags=49%, list=25%, signal=66%
REACTOME_TGF_BETA_RECEPTOR_SIGNALING_ACTIVATES_SMADS	REACTOME_TGF_BETA_RECEPTOR_SIGNALING_ACTIVATES_SMADS		24	0.574249	1.58949	0.0181044	0.0608243	1	3377	tags=38%, list=14%, signal=44%
ALCALA_APOPTOSIS	ALCALA_APOPTOSIS		79	0.449763	1.58934	0.00378703	0.0607539	1	4114	tags=39%, list=18%, signal=47%
BOHN_PRIMARY_IMMUNODEFICIENCY_SYNDROM_UP	BOHN_PRIMARY_IMMUNODEFICIENCY_SYNDROM_UP		41	0.506678	1.58637	0.0114261	0.0621874	1	5374	tags=59%, list=23%, signal=76%
DAIRKEE_CANCER_PRONE_RESPONSE_BPA	DAIRKEE_CANCER_PRONE_RESPONSE_BPA		49	0.489931	1.58519	0.00767544	0.0626819	1	4980	tags=51%, list=21%, signal=65%
WANG_RESPONSE_TO_GSK3_INHIBITOR_SB216763_DN	WANG_RESPONSE_TO_GSK3_INHIBITOR_SB216763_DN		334	0.374293	1.58402	0	0.0631733	1	4429	tags=38%, list=19%, signal=46%
YAGI_AML_WITH_INV_16_TRANSLOCATION	YAGI_AML_WITH_INV_16_TRANSLOCATION		385	0.368564	1.58208	0	0.064068	1	3911	tags=30%, list=17%, signal=36%
BIOCARTA_CCR3_PATHWAY	BIOCARTA_CCR3_PATHWAY		22	0.584998	1.58193	0.0205876	0.0639909	1	2482	tags=32%, list=11%, signal=36%
REACTOME_APC_CDC20_MEDIATED_DEGRADATION_OF_NEK2A	REACTOME_APC_CDC20_MEDIATED_DEGRADATION_OF_NEK2A		21	0.588589	1.58092	0.0261242	0.0644092	1	5711	tags=62%, list=24%, signal=82%
REACTOME_DARPP_32_EVENTS	REACTOME_DARPP_32_EVENTS		23	0.577096	1.58054	0.0264516	0.0644508	1	3735	tags=48%, list=16%, signal=57%
ODONNELL_TFRC_TARGETS_DN	ODONNELL_TFRC_TARGETS_DN		120	0.419437	1.57998	0.00115687	0.0646058	1	4961	tags=42%, list=21%, signal=53%
MCCLUNG_DELTA_FOSB_TARGETS_8WK	MCCLUNG_DELTA_FOSB_TARGETS_8WK		46	0.494129	1.57995	0.0108319	0.0644623	1	3034	tags=28%, list=13%, signal=32%
RAMPON_ENRICHED_LEARNING_ENVIRONMENT_LATE_UP	RAMPON_ENRICHED_LEARNING_ENVIRONMENT_LATE_UP		22	0.583606	1.57879	0.0252547	0.0649381	1	3246	tags=55%, list=14%, signal=63%
SCHUHMACHER_MYC_TARGETS_UP	SCHUHMACHER_MYC_TARGETS_UP		75	0.451151	1.57692	0.00487913	0.0658462	1	4782	tags=44%, list=20%, signal=55%
BIOCARTA_AT1R_PATHWAY	BIOCARTA_AT1R_PATHWAY		30	0.538017	1.5741	0.0194301	0.067249	1	1539	tags=27%, list=7%, signal=29%
CHEN_HOXA5_TARGETS_9HR_DN	CHEN_HOXA5_TARGETS_9HR_DN		37	0.513859	1.57399	0.0132149	0.0671454	1	3035	tags=43%, list=13%, signal=50%
NING_CHRONIC_OBSTRUCTIVE_PULMONARY_DISEASE_UP	NING_CHRONIC_OBSTRUCTIVE_PULMONARY_DISEASE_UP		148	0.407322	1.57189	0.00210477	0.0681824	1	3972	tags=37%, list=17%, signal=44%
WELCSH_BRCA1_TARGETS_UP	WELCSH_BRCA1_TARGETS_UP		183	0.395265	1.57149	0.000712082	0.0682376	1	4965	tags=41%, list=21%, signal=52%
FINETTI_BREAST_CANCER_KINOME_RED	FINETTI_BREAST_CANCER_KINOME_RED		16	0.62723	1.5705	0.0343949	0.0686538	1	4260	tags=50%, list=18%, signal=61%
CHIANG_LIVER_CANCER_SUBCLASS_PROLIFERATION_UP	CHIANG_LIVER_CANCER_SUBCLASS_PROLIFERATION_UP		164	0.40081	1.56977	0.00144718	0.0689029	1	4961	tags=44%, list=21%, signal=55%
ROZANOV_MMP14_TARGETS_DN	ROZANOV_MMP14_TARGETS_DN		26	0.553591	1.5695	0.0219041	0.0689053	1	4533	tags=54%, list=19%, signal=67%
DEN_INTERACT_WITH_LCA5	DEN_INTERACT_WITH_LCA5		26	0.55483	1.56926	0.0234987	0.0688824	1	4739	tags=54%, list=20%, signal=67%
AKL_HTLV1_INFECTION_UP	AKL_HTLV1_INFECTION_UP		24	0.565815	1.56731	0.0214528	0.0698725	1	3337	tags=50%, list=14%, signal=58%
MATTHEWS_AP1_TARGETS	MATTHEWS_AP1_TARGETS		16	0.625248	1.56712	0.0283673	0.0698158	1	1547	tags=31%, list=7%, signal=33%
BYSTRYKH_HEMATOPOIESIS_STEM_CELL_AND_BRAIN_QTL_CIS	BYSTRYKH_HEMATOPOIESIS_STEM_CELL_AND_BRAIN_QTL_CIS		59	0.467254	1.56675	0.00941282	0.0698697	1	5738	tags=46%, list=25%, signal=60%
DAZARD_RESPONSE_TO_UV_NHEK_UP	DAZARD_RESPONSE_TO_UV_NHEK_UP		221	0.385119	1.56522	0	0.0705862	1	3832	tags=34%, list=16%, signal=40%
KEGG_BUTANOATE_METABOLISM	KEGG_BUTANOATE_METABOLISM		32	0.527473	1.56483	0.0214564	0.0706686	1	4270	tags=38%, list=18%, signal=46%
REACTOME_DOWNREGULATION_OF_TGF_BETA_RECEPTOR_SIGNALING	REACTOME_DOWNREGULATION_OF_TGF_BETA_RECEPTOR_SIGNALING		21	0.583847	1.56338	0.0251995	0.0713838	1	3377	tags=38%, list=14%, signal=44%
GROSS_ELK3_TARGETS_UP	GROSS_ELK3_TARGETS_UP		27	0.547963	1.56316	0.0214684	0.0713411	1	2589	tags=33%, list=11%, signal=37%
ZEMBUTSU_SENSITIVITY_TO_VINBLASTINE	ZEMBUTSU_SENSITIVITY_TO_VINBLASTINE		16	0.620576	1.56231	0.0274262	0.0716733	1	2268	tags=31%, list=10%, signal=35%
GAZDA_DIAMOND_BLACKFAN_ANEMIA_MYELOID_DN	GAZDA_DIAMOND_BLACKFAN_ANEMIA_MYELOID_DN		31	0.531129	1.56181	0.0183888	0.071791	1	4167	tags=55%, list=18%, signal=67%
KAAB_HEART_ATRIUM_VS_VENTRICLE_DN	KAAB_HEART_ATRIUM_VS_VENTRICLE_DN		245	0.380273	1.55905	0	0.0732984	1	3246	tags=31%, list=14%, signal=35%
LABBE_WNT3A_TARGETS_DN	LABBE_WNT3A_TARGETS_DN		90	0.433598	1.5578	0.00390894	0.0738836	1	1873	tags=19%, list=8%, signal=20%
WONG_IFNA2_RESISTANCE_DN	WONG_IFNA2_RESISTANCE_DN		31	0.529411	1.55674	0.0155056	0.0743516	1	5411	tags=48%, list=23%, signal=63%
NING_CHRONIC_OBSTRUCTIVE_PULMONARY_DISEASE_DN	NING_CHRONIC_OBSTRUCTIVE_PULMONARY_DISEASE_DN		111	0.418557	1.55556	0.00252699	0.0749058	1	3820	tags=37%, list=16%, signal=44%
GRUETZMANN_PANCREATIC_CANCER_UP	GRUETZMANN_PANCREATIC_CANCER_UP		333	0.367181	1.55453	0	0.0753556	1	5191	tags=41%, list=22%, signal=52%
CROMER_METASTASIS_DN	CROMER_METASTASIS_DN		78	0.442709	1.5537	0.00566251	0.0756948	1	4124	tags=36%, list=18%, signal=43%
GARCIA_TARGETS_OF_FLI1_AND_DAX1_DN	GARCIA_TARGETS_OF_FLI1_AND_DAX1_DN		150	0.401387	1.55189	0.000942507	0.0766604	1	4919	tags=38%, list=21%, signal=48%
REACTOME_AMINO_ACID_SYNTHESIS_AND_INTERCONVERSION_TRANSAMINATION	REACTOME_AMINO_ACID_SYNTHESIS_AND_INTERCONVERSION_TRANSAMINATION		16	0.614208	1.5516	0.0376083	0.0766585	1	5332	tags=69%, list=23%, signal=89%
POMEROY_MEDULLOBLASTOMA_DESMOPLASIC_VS_CLASSIC_UP	POMEROY_MEDULLOBLASTOMA_DESMOPLASIC_VS_CLASSIC_UP		57	0.466593	1.54945	0.00672948	0.0778321	1	4197	tags=44%, list=18%, signal=53%
YAO_TEMPORAL_RESPONSE_TO_PROGESTERONE_CLUSTER_15	YAO_TEMPORAL_RESPONSE_TO_PROGESTERONE_CLUSTER_15		31	0.527772	1.54898	0.0237258	0.0779538	1	5178	tags=55%, list=22%, signal=70%
PID_HDAC_CLASSI_PATHWAY	PID_HDAC_CLASSI_PATHWAY		66	0.452007	1.54879	0.00737595	0.0778913	1	3889	tags=39%, list=17%, signal=47%
GERHOLD_ADIPOGENESIS_UP	GERHOLD_ADIPOGENESIS_UP		47	0.481817	1.54879	0.0115067	0.077716	1	2628	tags=26%, list=11%, signal=29%
REACTOME_EGFR_DOWNREGULATION	REACTOME_EGFR_DOWNREGULATION		24	0.553969	1.5485	0.0262245	0.0777218	1	4148	tags=54%, list=18%, signal=66%
LY_AGING_PREMATURE_DN	LY_AGING_PREMATURE_DN		29	0.534645	1.54817	0.0211161	0.0777669	1	3852	tags=41%, list=16%, signal=49%
ZHOU_TNF_SIGNALING_30MIN	ZHOU_TNF_SIGNALING_30MIN		52	0.473561	1.54697	0.0116383	0.0783637	1	5398	tags=50%, list=23%, signal=65%
PRAMOONJAGO_SOX4_TARGETS_DN	PRAMOONJAGO_SOX4_TARGETS_DN		49	0.478656	1.54537	0.013442	0.0792436	1	4471	tags=49%, list=19%, signal=60%
SESTO_RESPONSE_TO_UV_C6	SESTO_RESPONSE_TO_UV_C6		36	0.508864	1.54521	0.0198447	0.0791694	1	4744	tags=50%, list=20%, signal=63%
REACTOME_CYTOSOLIC_TRNA_AMINOACYLATION	REACTOME_CYTOSOLIC_TRNA_AMINOACYLATION		24	0.557638	1.54512	0.027161	0.079046	1	4989	tags=63%, list=21%, signal=79%
KAUFFMANN_DNA_REPLICATION_GENES	KAUFFMANN_DNA_REPLICATION_GENES		137	0.400611	1.54233	0.000947194	0.0806838	1	3852	tags=31%, list=16%, signal=36%
XU_HGF_TARGETS_INDUCED_BY_AKT1_48HR_DN	XU_HGF_TARGETS_INDUCED_BY_AKT1_48HR_DN		20	0.580192	1.54082	0.0307274	0.0815116	1	4797	tags=55%, list=20%, signal=69%
BOYLAN_MULTIPLE_MYELOMA_D_CLUSTER_UP	BOYLAN_MULTIPLE_MYELOMA_D_CLUSTER_UP		27	0.542991	1.54068	0.0258247	0.0814272	1	1726	tags=30%, list=7%, signal=32%
CHEMNITZ_RESPONSE_TO_PROSTAGLANDIN_E2_UP	CHEMNITZ_RESPONSE_TO_PROSTAGLANDIN_E2_UP		129	0.405346	1.5401	0.00163704	0.081624	1	6132	tags=50%, list=26%, signal=67%
WINTER_HYPOXIA_UP	WINTER_HYPOXIA_UP		85	0.43288	1.54003	0.00467706	0.0814837	1	3445	tags=32%, list=15%, signal=37%
JIANG_AGING_HYPOTHALAMUS_DN	JIANG_AGING_HYPOTHALAMUS_DN		40	0.496701	1.53986	0.014189	0.0814174	1	3956	tags=45%, list=17%, signal=54%
KIM_WT1_TARGETS_DN	KIM_WT1_TARGETS_DN		422	0.355985	1.53976	0	0.0812932	1	4583	tags=35%, list=20%, signal=43%
REACTOME_HIV_LIFE_CYCLE	REACTOME_HIV_LIFE_CYCLE		105	0.417881	1.53925	0.00297007	0.0814576	1	6056	tags=50%, list=26%, signal=66%
CHYLA_CBFA2T3_TARGETS_DN	CHYLA_CBFA2T3_TARGETS_DN		205	0.382015	1.53899	0.000474947	0.0814382	1	3734	tags=34%, list=16%, signal=40%
TARTE_PLASMA_CELL_VS_B_LYMPHOCYTE_UP	TARTE_PLASMA_CELL_VS_B_LYMPHOCYTE_UP		71	0.442623	1.53701	0.00872288	0.0825551	1	3765	tags=45%, list=16%, signal=54%
MAHAJAN_RESPONSE_TO_IL1A_DN	MAHAJAN_RESPONSE_TO_IL1A_DN		70	0.445394	1.53661	0.00674006	0.0826417	1	3696	tags=34%, list=16%, signal=41%
YAMASHITA_LIVER_CANCER_WITH_EPCAM_UP	YAMASHITA_LIVER_CANCER_WITH_EPCAM_UP		50	0.472833	1.53608	0.0138158	0.08284	1	3997	tags=44%, list=17%, signal=53%
MEINHOLD_OVARIAN_CANCER_LOW_GRADE_DN	MEINHOLD_OVARIAN_CANCER_LOW_GRADE_DN		20	0.579423	1.53499	0.0296565	0.0833796	1	6310	tags=85%, list=27%, signal=116%
BRACHAT_RESPONSE_TO_CAMPTOTHECIN_DN	BRACHAT_RESPONSE_TO_CAMPTOTHECIN_DN		40	0.494002	1.53375	0.0175517	0.0840445	1	4678	tags=45%, list=20%, signal=56%
XU_HGF_SIGNALING_NOT_VIA_AKT1_48HR_DN	XU_HGF_SIGNALING_NOT_VIA_AKT1_48HR_DN		19	0.586375	1.53362	0.0344315	0.0839444	1	1831	tags=37%, list=8%, signal=40%
SUBTIL_PROGESTIN_TARGETS	SUBTIL_PROGESTIN_TARGETS		34	0.514547	1.53203	0.0202559	0.0848451	1	3832	tags=38%, list=16%, signal=46%
CROMER_TUMORIGENESIS_DN	CROMER_TUMORIGENESIS_DN		45	0.482367	1.53201	0.0156585	0.084673	1	364	tags=9%, list=2%, signal=9%
FOURNIER_ACINAR_DEVELOPMENT_LATE_DN	FOURNIER_ACINAR_DEVELOPMENT_LATE_DN		21	0.569889	1.53052	0.0342581	0.0855189	1	3672	tags=38%, list=16%, signal=45%
BIOCARTA_ECM_PATHWAY	BIOCARTA_ECM_PATHWAY		22	0.562371	1.53008	0.0361971	0.0856291	1	4238	tags=41%, list=18%, signal=50%
YANG_BREAST_CANCER_ESR1_BULK_UP	YANG_BREAST_CANCER_ESR1_BULK_UP		24	0.551595	1.52966	0.0255926	0.085744	1	5331	tags=63%, list=23%, signal=81%
CHIARADONNA_NEOPLASTIC_TRANSFORMATION_CDC25_DN	CHIARADONNA_NEOPLASTIC_TRANSFORMATION_CDC25_DN		144	0.394855	1.52763	0.00207756	0.0869499	1	3926	tags=34%, list=17%, signal=41%
TORCHIA_TARGETS_OF_EWSR1_FLI1_FUSION_TOP20_DN	TORCHIA_TARGETS_OF_EWSR1_FLI1_FUSION_TOP20_DN		18	0.59203	1.5271	0.0398747	0.0871294	1	2114	tags=44%, list=9%, signal=49%
DAIRKEE_CANCER_PRONE_RESPONSE_BPA_E2	DAIRKEE_CANCER_PRONE_RESPONSE_BPA_E2		111	0.41047	1.52703	0.00443925	0.0869877	1	5226	tags=43%, list=22%, signal=55%
SESTO_RESPONSE_TO_UV_C1	SESTO_RESPONSE_TO_UV_C1		64	0.449528	1.5264	0.00995135	0.087242	1	4357	tags=41%, list=19%, signal=50%
MOHANKUMAR_TLX1_TARGETS_UP	MOHANKUMAR_TLX1_TARGETS_UP		385	0.354698	1.52479	0	0.0881729	1	4529	tags=37%, list=19%, signal=45%
NAKAJIMA_EOSINOPHIL	NAKAJIMA_EOSINOPHIL		27	0.537836	1.52464	0.0265601	0.0880962	1	599	tags=19%, list=3%, signal=19%
KUMAR_TARGETS_OF_MLL_AF9_FUSION	KUMAR_TARGETS_OF_MLL_AF9_FUSION		371	0.355148	1.52243	0	0.0894472	1	2754	tags=26%, list=12%, signal=29%
DITTMER_PTHLH_TARGETS_UP	DITTMER_PTHLH_TARGETS_UP		110	0.410044	1.52214	0.00433988	0.0894603	1	5167	tags=49%, list=22%, signal=63%
REACTOME_ELONGATION_ARREST_AND_RECOVERY	REACTOME_ELONGATION_ARREST_AND_RECOVERY		24	0.548911	1.52196	0.0337896	0.089388	1	3239	tags=38%, list=14%, signal=43%
LI_INDUCED_T_TO_NATURAL_KILLER_DN	LI_INDUCED_T_TO_NATURAL_KILLER_DN		110	0.408466	1.52087	0.00293057	0.0899404	1	2735	tags=31%, list=12%, signal=35%
KEGG_RNA_POLYMERASE	KEGG_RNA_POLYMERASE		27	0.534828	1.51989	0.0286754	0.0904397	1	5030	tags=48%, list=21%, signal=61%
ZHAN_V2_LATE_DIFFERENTIATION_GENES	ZHAN_V2_LATE_DIFFERENTIATION_GENES		41	0.485046	1.51935	0.0174749	0.09062	1	4261	tags=39%, list=18%, signal=48%
KEGG_THYROID_CANCER	KEGG_THYROID_CANCER		27	0.533912	1.51933	0.0300044	0.0904396	1	2628	tags=26%, list=11%, signal=29%
REACTOME_ACTIVATED_AMPK_STIMULATES_FATTY_ACID_OXIDATION_IN_MUSCLE	REACTOME_ACTIVATED_AMPK_STIMULATES_FATTY_ACID_OXIDATION_IN_MUSCLE		18	0.592759	1.51832	0.0333475	0.0909799	1	4921	tags=56%, list=21%, signal=70%
REACTOME_FACTORS_INVOLVED_IN_MEGAKARYOCYTE_DEVELOPMENT_AND_PLATELET_PRODUCTION	REACTOME_FACTORS_INVOLVED_IN_MEGAKARYOCYTE_DEVELOPMENT_AND_PLATELET_PRODUCTION		110	0.407093	1.51694	0.00615455	0.0918073	1	3717	tags=33%, list=16%, signal=39%
HAHTOLA_MYCOSIS_FUNGOIDES_CD4_DN	HAHTOLA_MYCOSIS_FUNGOIDES_CD4_DN		107	0.410505	1.51636	0.00452899	0.0920471	1	4344	tags=38%, list=19%, signal=47%
ZHU_CMV_ALL_UP	ZHU_CMV_ALL_UP		113	0.404887	1.51593	0.00323774	0.0921634	1	4869	tags=45%, list=21%, signal=57%
DANG_MYC_TARGETS_DN	DANG_MYC_TARGETS_DN		31	0.510813	1.51523	0.0247022	0.0924867	1	906	tags=13%, list=4%, signal=13%
KEGG_LYSOSOME	KEGG_LYSOSOME		117	0.405062	1.51467	0.00384094	0.0926943	1	3859	tags=31%, list=16%, signal=37%
YAO_TEMPORAL_RESPONSE_TO_PROGESTERONE_CLUSTER_11	YAO_TEMPORAL_RESPONSE_TO_PROGESTERONE_CLUSTER_11		97	0.414226	1.51434	0.00452591	0.0927505	1	5240	tags=42%, list=22%, signal=54%
REACTOME_ENOS_ACTIVATION_AND_REGULATION	REACTOME_ENOS_ACTIVATION_AND_REGULATION		19	0.576971	1.51421	0.0375908	0.0926536	1	1559	tags=37%, list=7%, signal=39%
CHNG_MULTIPLE_MYELOMA_HYPERPLOID_DN	CHNG_MULTIPLE_MYELOMA_HYPERPLOID_DN		28	0.526576	1.51325	0.0339847	0.0931804	1	6339	tags=57%, list=27%, signal=78%
REACTOME_LYSOSOME_VESICLE_BIOGENESIS	REACTOME_LYSOSOME_VESICLE_BIOGENESIS		22	0.559479	1.51226	0.0361213	0.0937312	1	3337	tags=50%, list=14%, signal=58%
REACTOME_FORMATION_OF_THE_HIV1_EARLY_ELONGATION_COMPLEX	REACTOME_FORMATION_OF_THE_HIV1_EARLY_ELONGATION_COMPLEX		26	0.534553	1.51184	0.0313107	0.0938503	1	3175	tags=42%, list=14%, signal=49%
GROSS_HYPOXIA_VIA_HIF1A_DN	GROSS_HYPOXIA_VIA_HIF1A_DN		104	0.410916	1.51176	0.00571559	0.0937144	1	2180	tags=24%, list=9%, signal=26%
HESS_TARGETS_OF_HOXA9_AND_MEIS1_UP	HESS_TARGETS_OF_HOXA9_AND_MEIS1_UP		64	0.441343	1.51056	0.013035	0.0944165	1	4791	tags=41%, list=20%, signal=51%
KIM_WT1_TARGETS_12HR_DN	KIM_WT1_TARGETS_12HR_DN		196	0.376312	1.5105	0.000240154	0.0942631	1	3097	tags=26%, list=13%, signal=30%
PID_MTOR_4PATHWAY	PID_MTOR_4PATHWAY		68	0.439186	1.51042	0.0096895	0.0941289	1	4328	tags=38%, list=18%, signal=47%
YAO_TEMPORAL_RESPONSE_TO_PROGESTERONE_CLUSTER_4	YAO_TEMPORAL_RESPONSE_TO_PROGESTERONE_CLUSTER_4		15	0.611566	1.50945	0.0457836	0.0946663	1	4978	tags=40%, list=21%, signal=51%
KEGG_GLYCOSPHINGOLIPID_BIOSYNTHESIS_GANGLIO_SERIES	KEGG_GLYCOSPHINGOLIPID_BIOSYNTHESIS_GANGLIO_SERIES		15	0.613831	1.50902	0.047004	0.0947954	1	2051	tags=40%, list=9%, signal=44%
AMUNDSON_GAMMA_RADIATION_RESISTANCE	AMUNDSON_GAMMA_RADIATION_RESISTANCE		19	0.578206	1.50878	0.0418446	0.0947795	1	2276	tags=32%, list=10%, signal=35%
CHAUHAN_RESPONSE_TO_METHOXYESTRADIOL_DN	CHAUHAN_RESPONSE_TO_METHOXYESTRADIOL_DN		94	0.417984	1.50853	0.00608108	0.0947801	1	3948	tags=43%, list=17%, signal=51%
HU_GENOTOXIC_DAMAGE_4HR	HU_GENOTOXIC_DAMAGE_4HR		35	0.498823	1.50783	0.0282793	0.0951018	1	4483	tags=43%, list=19%, signal=53%
JAEGER_METASTASIS_UP	JAEGER_METASTASIS_UP		40	0.485951	1.50756	0.0191196	0.0951149	1	3212	tags=45%, list=14%, signal=52%
HERNANDEZ_ABERRANT_MITOSIS_BY_DOCETACEL_4NM_UP	HERNANDEZ_ABERRANT_MITOSIS_BY_DOCETACEL_4NM_UP		20	0.567703	1.50725	0.033326	0.0951574	1	1150	tags=35%, list=5%, signal=37%
KEGG_BETA_ALANINE_METABOLISM	KEGG_BETA_ALANINE_METABOLISM		22	0.557604	1.50657	0.0372182	0.0954739	1	1912	tags=27%, list=8%, signal=30%
REACTOME_METABOLISM_OF_NON_CODING_RNA	REACTOME_METABOLISM_OF_NON_CODING_RNA		47	0.470993	1.50548	0.0214583	0.0961063	1	5158	tags=47%, list=22%, signal=60%
BIOCARTA_NOS1_PATHWAY	BIOCARTA_NOS1_PATHWAY		20	0.568228	1.50485	0.0431858	0.096377	1	2592	tags=35%, list=11%, signal=39%
KAAB_FAILED_HEART_VENTRICLE_DN	KAAB_FAILED_HEART_VENTRICLE_DN		36	0.493922	1.50337	0.0245385	0.0973068	1	5421	tags=58%, list=23%, signal=76%
SU_PLACENTA	SU_PLACENTA		26	0.533816	1.5031	0.0354625	0.0973136	1	2787	tags=31%, list=12%, signal=35%
VERHAAK_GLIOBLASTOMA_NEURAL	VERHAAK_GLIOBLASTOMA_NEURAL		118	0.401279	1.50223	0.00326188	0.0977817	1	3855	tags=32%, list=16%, signal=38%
KORKOLA_TERATOMA	KORKOLA_TERATOMA		39	0.485962	1.50186	0.0260508	0.0978704	1	5581	tags=44%, list=24%, signal=57%
KASLER_HDAC7_TARGETS_1_UP	KASLER_HDAC7_TARGETS_1_UP		186	0.375344	1.50079	0.00073046	0.0984659	1	4826	tags=41%, list=21%, signal=52%
FARMER_BREAST_CANCER_CLUSTER_2	FARMER_BREAST_CANCER_CLUSTER_2		32	0.511243	1.50067	0.02893	0.0983565	1	4916	tags=47%, list=21%, signal=59%
KEGG_PYRIMIDINE_METABOLISM	KEGG_PYRIMIDINE_METABOLISM		95	0.413224	1.49927	0.00550585	0.0992535	1	2857	tags=28%, list=12%, signal=32%
KEGG_PROXIMAL_TUBULE_BICARBONATE_RECLAMATION	KEGG_PROXIMAL_TUBULE_BICARBONATE_RECLAMATION		20	0.568234	1.49925	0.043347	0.0990688	1	4909	tags=55%, list=21%, signal=70%
CUI_TCF21_TARGETS_2_UP	CUI_TCF21_TARGETS_2_UP		400	0.348051	1.49907	0	0.0990059	1	4306	tags=35%, list=18%, signal=42%
HIRSCH_CELLULAR_TRANSFORMATION_SIGNATURE_DN	HIRSCH_CELLULAR_TRANSFORMATION_SIGNATURE_DN		93	0.413654	1.49896	0.00704545	0.0988948	1	5012	tags=41%, list=21%, signal=52%
HOEBEKE_LYMPHOID_STEM_CELL_DN	HOEBEKE_LYMPHOID_STEM_CELL_DN		82	0.42272	1.49885	0.00933303	0.0987866	1	3301	tags=33%, list=14%, signal=38%
PURBEY_TARGETS_OF_CTBP1_AND_SATB1_UP	PURBEY_TARGETS_OF_CTBP1_AND_SATB1_UP		75	0.427366	1.49879	0.00875617	0.0986395	1	3583	tags=37%, list=15%, signal=44%
DAZARD_RESPONSE_TO_UV_SCC_UP	DAZARD_RESPONSE_TO_UV_SCC_UP		110	0.404716	1.49741	0.00565611	0.0994949	1	4442	tags=45%, list=19%, signal=56%
GROSS_HYPOXIA_VIA_ELK3_UP	GROSS_HYPOXIA_VIA_ELK3_UP		199	0.372628	1.4949	0.00168512	0.101248	1	3061	tags=28%, list=13%, signal=32%
HONRADO_BREAST_CANCER_BRCA1_VS_BRCA2	HONRADO_BREAST_CANCER_BRCA1_VS_BRCA2		17	0.586615	1.49473	0.0417461	0.101188	1	2944	tags=35%, list=13%, signal=40%
TAKEDA_TARGETS_OF_NUP98_HOXA9_FUSION_10D_DN	TAKEDA_TARGETS_OF_NUP98_HOXA9_FUSION_10D_DN		119	0.397818	1.49413	0.00487126	0.101456	1	3862	tags=33%, list=16%, signal=39%
MANTOVANI_VIRAL_GPCR_SIGNALING_DN	MANTOVANI_VIRAL_GPCR_SIGNALING_DN		42	0.477894	1.49334	0.024183	0.101885	1	4242	tags=38%, list=18%, signal=46%
REACTOME_DEADENYLATION_DEPENDENT_MRNA_DECAY	REACTOME_DEADENYLATION_DEPENDENT_MRNA_DECAY		43	0.474513	1.49283	0.0222465	0.102078	1	2701	tags=26%, list=12%, signal=29%
CHEOK_RESPONSE_TO_MERCAPTOPURINE_AND_HD_MTX_DN	CHEOK_RESPONSE_TO_MERCAPTOPURINE_AND_HD_MTX_DN		21	0.554108	1.49108	0.0432138	0.103221	1	3618	tags=38%, list=15%, signal=45%
VIETOR_IFRD1_TARGETS	VIETOR_IFRD1_TARGETS		23	0.544208	1.49059	0.0444111	0.103394	1	4417	tags=52%, list=19%, signal=64%
BIOCARTA_MTA3_PATHWAY	BIOCARTA_MTA3_PATHWAY		17	0.585027	1.48977	0.043913	0.10383	1	4696	tags=59%, list=20%, signal=74%
REACTOME_SYNTHESIS_AND_INTERCONVERSION_OF_NUCLEOTIDE_DI_AND_TRIPHOSPHATES	REACTOME_SYNTHESIS_AND_INTERCONVERSION_OF_NUCLEOTIDE_DI_AND_TRIPHOSPHATES		17	0.58896	1.48966	0.0497651	0.103726	1	4517	tags=71%, list=19%, signal=87%
GARY_CD5_TARGETS_DN	GARY_CD5_TARGETS_DN		404	0.345437	1.48827	0	0.104616	1	5137	tags=40%, list=22%, signal=51%
REACTOME_RNA_POL_II_PRE_TRANSCRIPTION_EVENTS	REACTOME_RNA_POL_II_PRE_TRANSCRIPTION_EVENTS		50	0.458938	1.48731	0.0212625	0.105183	1	3985	tags=42%, list=17%, signal=51%
HOLLEMAN_VINCRISTINE_RESISTANCE_B_ALL_DN	HOLLEMAN_VINCRISTINE_RESISTANCE_B_ALL_DN		15	0.604092	1.48678	0.050537	0.105426	1	1442	tags=40%, list=6%, signal=43%
JEPSEN_SMRT_TARGETS	JEPSEN_SMRT_TARGETS		32	0.503587	1.48674	0.0306522	0.105264	1	285	tags=13%, list=1%, signal=13%
ZHU_CMV_24_HR_DN	ZHU_CMV_24_HR_DN		84	0.417173	1.48384	0.0123707	0.107362	1	2561	tags=25%, list=11%, signal=28%
BIOCARTA_PYK2_PATHWAY	BIOCARTA_PYK2_PATHWAY		27	0.524151	1.48216	0.0381137	0.108506	1	1653	tags=26%, list=7%, signal=28%
GARGALOVIC_RESPONSE_TO_OXIDIZED_PHOSPHOLIPIDS_GREEN_UP	GARGALOVIC_RESPONSE_TO_OXIDIZED_PHOSPHOLIPIDS_GREEN_UP		22	0.545281	1.48127	0.0466809	0.10903	1	236	tags=18%, list=1%, signal=18%
KEEN_RESPONSE_TO_ROSIGLITAZONE_UP	KEEN_RESPONSE_TO_ROSIGLITAZONE_UP		35	0.492005	1.48074	0.0342956	0.10928	1	3758	tags=40%, list=16%, signal=48%
BIOCARTA_TFF_PATHWAY	BIOCARTA_TFF_PATHWAY		19	0.563591	1.48066	0.0541121	0.109139	1	4238	tags=37%, list=18%, signal=45%
SAGIV_CD24_TARGETS_DN	SAGIV_CD24_TARGETS_DN		42	0.472327	1.4797	0.0262028	0.109709	1	1785	tags=24%, list=8%, signal=26%
LABBE_WNT3A_TARGETS_UP	LABBE_WNT3A_TARGETS_UP		107	0.400984	1.47964	0.00585981	0.109554	1	5074	tags=42%, list=22%, signal=53%
PROVENZANI_METASTASIS_DN	PROVENZANI_METASTASIS_DN		129	0.389119	1.47836	0.00656814	0.110401	1	5161	tags=38%, list=22%, signal=48%
GRAHAM_CML_QUIESCENT_VS_NORMAL_QUIESCENT_UP	GRAHAM_CML_QUIESCENT_VS_NORMAL_QUIESCENT_UP		78	0.420375	1.4776	0.0114416	0.110832	1	4483	tags=51%, list=19%, signal=63%
VECCHI_GASTRIC_CANCER_EARLY_UP	VECCHI_GASTRIC_CANCER_EARLY_UP		387	0.344667	1.4771	0.000265534	0.111063	1	5594	tags=44%, list=24%, signal=57%
HU_ANGIOGENESIS_DN	HU_ANGIOGENESIS_DN		34	0.493372	1.47707	0.0318828	0.110879	1	5126	tags=50%, list=22%, signal=64%
LU_TUMOR_ANGIOGENESIS_UP	LU_TUMOR_ANGIOGENESIS_UP		25	0.527331	1.47702	0.0433096	0.11071	1	403	tags=20%, list=2%, signal=20%
ZHAN_V1_LATE_DIFFERENTIATION_GENES_UP	ZHAN_V1_LATE_DIFFERENTIATION_GENES_UP		29	0.510009	1.47649	0.0383373	0.110955	1	4091	tags=45%, list=17%, signal=54%
SIMBULAN_PARP1_TARGETS_DN	SIMBULAN_PARP1_TARGETS_DN		17	0.57968	1.476	0.0555198	0.111157	1	4122	tags=53%, list=18%, signal=64%
MATZUK_IMPLANTATION_AND_UTERINE	MATZUK_IMPLANTATION_AND_UTERINE		21	0.552047	1.47583	0.0476903	0.111091	1	3155	tags=33%, list=13%, signal=38%
REACTOME_MICRORNA_MIRNA_BIOGENESIS	REACTOME_MICRORNA_MIRNA_BIOGENESIS		22	0.539015	1.4751	0.0466809	0.111512	1	3175	tags=41%, list=14%, signal=47%
BROWNE_HCMV_INFECTION_6HR_UP	BROWNE_HCMV_INFECTION_6HR_UP		62	0.437771	1.47411	0.0158695	0.112149	1	2745	tags=26%, list=12%, signal=29%
REACTOME_RNA_POL_II_TRANSCRIPTION_PRE_INITIATION_AND_PROMOTER_OPENING	REACTOME_RNA_POL_II_TRANSCRIPTION_PRE_INITIATION_AND_PROMOTER_OPENING		38	0.476826	1.47369	0.0296922	0.112302	1	3985	tags=45%, list=17%, signal=54%
HOLLEMAN_VINCRISTINE_RESISTANCE_ALL_DN	HOLLEMAN_VINCRISTINE_RESISTANCE_ALL_DN		19	0.56285	1.47207	0.05067	0.113435	1	1647	tags=37%, list=7%, signal=40%
REACTOME_KERATAN_SULFATE_KERATIN_METABOLISM	REACTOME_KERATAN_SULFATE_KERATIN_METABOLISM		29	0.50607	1.47163	0.0356051	0.113591	1	2745	tags=41%, list=12%, signal=47%
JAERVINEN_AMPLIFIED_IN_LARYNGEAL_CANCER	JAERVINEN_AMPLIFIED_IN_LARYNGEAL_CANCER		35	0.48884	1.47154	0.0358151	0.113462	1	3702	tags=40%, list=16%, signal=47%
GRANDVAUX_IRF3_TARGETS_DN	GRANDVAUX_IRF3_TARGETS_DN		17	0.577359	1.47102	0.0580205	0.113688	1	458	tags=24%, list=2%, signal=24%
VANTVEER_BREAST_CANCER_METASTASIS_DN	VANTVEER_BREAST_CANCER_METASTASIS_DN		107	0.397282	1.47034	0.00742073	0.114029	1	5886	tags=48%, list=25%, signal=63%
LEONARD_HYPOXIA	LEONARD_HYPOXIA		46	0.459728	1.47032	0.0232912	0.113843	1	2061	tags=30%, list=9%, signal=33%
REACTOME_SULFUR_AMINO_ACID_METABOLISM	REACTOME_SULFUR_AMINO_ACID_METABOLISM		24	0.532226	1.46958	0.0438315	0.114288	1	2137	tags=29%, list=9%, signal=32%
CROMER_TUMORIGENESIS_UP	CROMER_TUMORIGENESIS_UP		57	0.442252	1.46914	0.0227831	0.114464	1	1779	tags=21%, list=8%, signal=23%
REACTOME_MRNA_CAPPING	REACTOME_MRNA_CAPPING		27	0.516687	1.46876	0.0469828	0.114586	1	4800	tags=52%, list=20%, signal=65%
REACTOME_ADAPTIVE_IMMUNE_SYSTEM	REACTOME_ADAPTIVE_IMMUNE_SYSTEM		470	0.334998	1.46672	0	0.116148	1	4328	tags=33%, list=18%, signal=40%
DACOSTA_UV_RESPONSE_VIA_ERCC3_UP	DACOSTA_UV_RESPONSE_VIA_ERCC3_UP		282	0.351523	1.46654	0.000754337	0.116094	1	4551	tags=35%, list=19%, signal=43%
WANG_TUMOR_INVASIVENESS_DN	WANG_TUMOR_INVASIVENESS_DN		200	0.365881	1.46633	0.00267445	0.116061	1	5069	tags=37%, list=22%, signal=47%
GOLDRATH_ANTIGEN_RESPONSE	GOLDRATH_ANTIGEN_RESPONSE		318	0.347852	1.46588	0.001002	0.116253	1	4426	tags=40%, list=19%, signal=49%
HOUSTIS_ROS	HOUSTIS_ROS		32	0.493825	1.46568	0.038863	0.116216	1	2023	tags=34%, list=9%, signal=38%
HADDAD_B_LYMPHOCYTE_PROGENITOR	HADDAD_B_LYMPHOCYTE_PROGENITOR		245	0.35584	1.46408	0.0012288	0.117405	1	4664	tags=35%, list=20%, signal=43%
CHOI_ATL_STAGE_PREDICTOR	CHOI_ATL_STAGE_PREDICTOR		35	0.483539	1.46366	0.0341937	0.117561	1	3950	tags=46%, list=17%, signal=55%
BOYAULT_LIVER_CANCER_SUBCLASS_G6_UP	BOYAULT_LIVER_CANCER_SUBCLASS_G6_UP		58	0.436642	1.46351	0.0208929	0.117489	1	4965	tags=50%, list=21%, signal=63%
HU_GENOTOXIC_DAMAGE_24HR	HU_GENOTOXIC_DAMAGE_24HR		33	0.488804	1.46122	0.0355603	0.119287	1	4964	tags=55%, list=21%, signal=69%
RUIZ_TNC_TARGETS_DN	RUIZ_TNC_TARGETS_DN		137	0.381167	1.4602	0.00652225	0.119961	1	4128	tags=36%, list=18%, signal=44%
ZAMORA_NOS2_TARGETS_DN	ZAMORA_NOS2_TARGETS_DN		90	0.407153	1.4596	0.0135471	0.120277	1	4521	tags=36%, list=19%, signal=44%
LINDGREN_BLADDER_CANCER_CLUSTER_1_DN	LINDGREN_BLADDER_CANCER_CLUSTER_1_DN		346	0.344515	1.45909	0	0.120512	1	4541	tags=32%, list=19%, signal=40%
GEORGES_CELL_CYCLE_MIR192_TARGETS	GEORGES_CELL_CYCLE_MIR192_TARGETS		60	0.436186	1.45833	0.0228249	0.12096	1	4520	tags=38%, list=19%, signal=47%
WENG_POR_TARGETS_LIVER_UP	WENG_POR_TARGETS_LIVER_UP		32	0.493162	1.45769	0.0358523	0.121306	1	4284	tags=38%, list=18%, signal=46%
HU_GENOTOXIN_ACTION_DIRECT_VS_INDIRECT_24HR	HU_GENOTOXIN_ACTION_DIRECT_VS_INDIRECT_24HR		49	0.451306	1.45749	0.0270865	0.121264	1	3827	tags=37%, list=16%, signal=44%
MOREAUX_B_LYMPHOCYTE_MATURATION_BY_TACI_DN	MOREAUX_B_LYMPHOCYTE_MATURATION_BY_TACI_DN		63	0.432065	1.45728	0.021055	0.121244	1	6322	tags=54%, list=27%, signal=74%
REN_ALVEOLAR_RHABDOMYOSARCOMA_DN	REN_ALVEOLAR_RHABDOMYOSARCOMA_DN		400	0.337149	1.45642	0.000253743	0.121804	1	3682	tags=28%, list=16%, signal=33%
WHITFIELD_CELL_CYCLE_G2	WHITFIELD_CELL_CYCLE_G2		162	0.371045	1.45634	0.00328407	0.121662	1	4916	tags=41%, list=21%, signal=51%
ACEVEDO_NORMAL_TISSUE_ADJACENT_TO_LIVER_TUMOR_DN	ACEVEDO_NORMAL_TISSUE_ADJACENT_TO_LIVER_TUMOR_DN		321	0.344964	1.45602	0.00100427	0.121739	1	4631	tags=35%, list=20%, signal=43%
KYNG_RESPONSE_TO_H2O2	KYNG_RESPONSE_TO_H2O2		66	0.426989	1.45407	0.023686	0.123259	1	2313	tags=27%, list=10%, signal=30%
DACOSTA_UV_RESPONSE_VIA_ERCC3_TTD_UP	DACOSTA_UV_RESPONSE_VIA_ERCC3_TTD_UP		63	0.427263	1.45354	0.0204082	0.123517	1	3955	tags=33%, list=17%, signal=40%
LU_AGING_BRAIN_DN	LU_AGING_BRAIN_DN		146	0.377219	1.45339	0.00545703	0.123439	1	4529	tags=34%, list=19%, signal=42%
DUTERTRE_ESTRADIOL_RESPONSE_24HR_UP	DUTERTRE_ESTRADIOL_RESPONSE_24HR_UP		306	0.344963	1.45251	0.000998004	0.124012	1	5037	tags=38%, list=22%, signal=47%
COATES_MACROPHAGE_M1_VS_M2_DN	COATES_MACROPHAGE_M1_VS_M2_DN		68	0.423668	1.4525	0.0218254	0.123799	1	2384	tags=28%, list=10%, signal=31%
TAKEDA_TARGETS_OF_NUP98_HOXA9_FUSION_8D_DN	TAKEDA_TARGETS_OF_NUP98_HOXA9_FUSION_8D_DN		175	0.367237	1.45155	0.00234082	0.124454	1	2416	tags=24%, list=10%, signal=27%
LUCAS_HNF4A_TARGETS_UP	LUCAS_HNF4A_TARGETS_UP		53	0.441549	1.45006	0.0271111	0.125608	1	4465	tags=42%, list=19%, signal=51%
BERENJENO_TRANSFORMED_BY_RHOA_REVERSIBLY_DN	BERENJENO_TRANSFORMED_BY_RHOA_REVERSIBLY_DN		28	0.506037	1.44991	0.0473193	0.125528	1	2335	tags=29%, list=10%, signal=32%
LIU_PROSTATE_CANCER_UP	LIU_PROSTATE_CANCER_UP		82	0.407762	1.44966	0.0154813	0.125529	1	2161	tags=26%, list=9%, signal=28%
CHEN_NEUROBLASTOMA_COPY_NUMBER_GAINS	CHEN_NEUROBLASTOMA_COPY_NUMBER_GAINS		47	0.451222	1.44946	0.0301442	0.12549	1	3141	tags=26%, list=13%, signal=29%
MARTORIATI_MDM4_TARGETS_FETAL_LIVER_UP	MARTORIATI_MDM4_TARGETS_FETAL_LIVER_UP		207	0.358324	1.44915	0.00407772	0.125557	1	3521	tags=32%, list=15%, signal=37%
VERRECCHIA_EARLY_RESPONSE_TO_TGFB1	VERRECCHIA_EARLY_RESPONSE_TO_TGFB1		57	0.435565	1.44877	0.0241524	0.125684	1	2409	tags=26%, list=10%, signal=29%
PROVENZANI_METASTASIS_UP	PROVENZANI_METASTASIS_UP		180	0.364404	1.44857	0.00333175	0.125649	1	5046	tags=38%, list=22%, signal=48%
AMIT_EGF_RESPONSE_480_HELA	AMIT_EGF_RESPONSE_480_HELA		151	0.372614	1.44824	0.00354024	0.125734	1	4012	tags=30%, list=17%, signal=36%
REACTOME_DNA_STRAND_ELONGATION	REACTOME_DNA_STRAND_ELONGATION		30	0.493552	1.44494	0.0460484	0.128552	1	3852	tags=40%, list=16%, signal=48%
BROWNE_HCMV_INFECTION_24HR_UP	BROWNE_HCMV_INFECTION_24HR_UP		138	0.375988	1.44452	0.005082	0.12873	1	4915	tags=37%, list=21%, signal=46%
PASQUALUCCI_LYMPHOMA_BY_GC_STAGE_UP	PASQUALUCCI_LYMPHOMA_BY_GC_STAGE_UP		263	0.348725	1.44339	0.00295931	0.129554	1	3409	tags=30%, list=15%, signal=35%
BAKKER_FOXO3_TARGETS_DN	BAKKER_FOXO3_TARGETS_DN		166	0.366941	1.44301	0.0056684	0.1297	1	4847	tags=40%, list=21%, signal=50%
REACTOME_METABOLISM_OF_NUCLEOTIDES	REACTOME_METABOLISM_OF_NUCLEOTIDES		69	0.418918	1.44272	0.0220906	0.129765	1	4517	tags=45%, list=19%, signal=56%
LANDIS_BREAST_CANCER_PROGRESSION_DN	LANDIS_BREAST_CANCER_PROGRESSION_DN		68	0.420066	1.44185	0.0199283	0.130384	1	3926	tags=35%, list=17%, signal=42%
REACTOME_APOPTOTIC_EXECUTION_PHASE	REACTOME_APOPTOTIC_EXECUTION_PHASE		49	0.44491	1.44172	0.0313581	0.130278	1	3433	tags=37%, list=15%, signal=43%
KEGG_DORSO_VENTRAL_AXIS_FORMATION	KEGG_DORSO_VENTRAL_AXIS_FORMATION		22	0.532648	1.44129	0.058193	0.130446	1	2661	tags=32%, list=11%, signal=36%
EGUCHI_CELL_CYCLE_RB1_TARGETS	EGUCHI_CELL_CYCLE_RB1_TARGETS		23	0.528224	1.44055	0.0591679	0.130923	1	4797	tags=57%, list=20%, signal=71%
FERRANDO_T_ALL_WITH_MLL_ENL_FUSION_UP	FERRANDO_T_ALL_WITH_MLL_ENL_FUSION_UP		80	0.407816	1.44016	0.0177648	0.131065	1	3517	tags=29%, list=15%, signal=34%
BIOCARTA_EIF_PATHWAY	BIOCARTA_EIF_PATHWAY		15	0.585175	1.43954	0.070724	0.131442	1	4437	tags=47%, list=19%, signal=58%
SPIRA_SMOKERS_LUNG_CANCER_UP	SPIRA_SMOKERS_LUNG_CANCER_UP		36	0.473627	1.43904	0.0398873	0.131714	1	5553	tags=50%, list=24%, signal=65%
REACTOME_KINESINS	REACTOME_KINESINS		22	0.526497	1.43787	0.0611147	0.132585	1	4239	tags=41%, list=18%, signal=50%
PETROVA_ENDOTHELIUM_LYMPHATIC_VS_BLOOD_UP	PETROVA_ENDOTHELIUM_LYMPHATIC_VS_BLOOD_UP		124	0.380846	1.43726	0.00820441	0.132965	1	4239	tags=36%, list=18%, signal=44%
MARKEY_RB1_CHRONIC_LOF_DN	MARKEY_RB1_CHRONIC_LOF_DN		111	0.386014	1.43715	0.0113182	0.132843	1	1717	tags=22%, list=7%, signal=23%
SCHAEFFER_SOX9_TARGETS_IN_PROSTATE_DEVELOPMENT_UP	SCHAEFFER_SOX9_TARGETS_IN_PROSTATE_DEVELOPMENT_UP		20	0.539254	1.43677	0.0586854	0.132966	1	4875	tags=45%, list=21%, signal=57%
PID_RAS_PATHWAY	PID_RAS_PATHWAY		28	0.50032	1.43655	0.052598	0.13295	1	1942	tags=25%, list=8%, signal=27%
KEGG_GLYCINE_SERINE_AND_THREONINE_METABOLISM	KEGG_GLYCINE_SERINE_AND_THREONINE_METABOLISM		31	0.488748	1.4359	0.0470002	0.133356	1	2892	tags=29%, list=12%, signal=33%
WANG_ADIPOGENIC_GENES_REPRESSED_BY_SIRT1	WANG_ADIPOGENIC_GENES_REPRESSED_BY_SIRT1		25	0.51689	1.43533	0.0565508	0.133684	1	4420	tags=48%, list=19%, signal=59%
SU_THYMUS	SU_THYMUS		17	0.562538	1.43492	0.067818	0.133854	1	2605	tags=35%, list=11%, signal=40%
HOLLEMAN_PREDNISOLONE_RESISTANCE_B_ALL_UP	HOLLEMAN_PREDNISOLONE_RESISTANCE_B_ALL_UP		20	0.540707	1.43464	0.0615319	0.133889	1	4453	tags=60%, list=19%, signal=74%
REACTOME_GLUCOSE_METABOLISM	REACTOME_GLUCOSE_METABOLISM		58	0.429169	1.43427	0.0277778	0.134044	1	3224	tags=34%, list=14%, signal=40%
GROSS_HIF1A_TARGETS_DN	GROSS_HIF1A_TARGETS_DN		25	0.511629	1.43393	0.0561503	0.134144	1	2846	tags=36%, list=12%, signal=41%
OKAMOTO_LIVER_CANCER_MULTICENTRIC_OCCURRENCE_UP	OKAMOTO_LIVER_CANCER_MULTICENTRIC_OCCURRENCE_UP		22	0.526265	1.43328	0.0577333	0.13456	1	4078	tags=41%, list=17%, signal=49%
PID_LIS1_PATHWAY	PID_LIS1_PATHWAY		27	0.502565	1.4327	0.0524604	0.13489	1	6136	tags=63%, list=26%, signal=85%
MOREAUX_MULTIPLE_MYELOMA_BY_TACI_DN	MOREAUX_MULTIPLE_MYELOMA_BY_TACI_DN		150	0.369076	1.43156	0.00895171	0.13578	1	4685	tags=36%, list=20%, signal=45%
REACTOME_MRNA_3_END_PROCESSING	REACTOME_MRNA_3_END_PROCESSING		33	0.479354	1.43106	0.0456315	0.136053	1	4814	tags=48%, list=21%, signal=61%
REACTOME_IRON_UPTAKE_AND_TRANSPORT	REACTOME_IRON_UPTAKE_AND_TRANSPORT		32	0.482465	1.43096	0.044193	0.135923	1	3910	tags=34%, list=17%, signal=41%
REACTOME_APC_C_CDC20_MEDIATED_DEGRADATION_OF_CYCLIN_B	REACTOME_APC_C_CDC20_MEDIATED_DEGRADATION_OF_CYCLIN_B		19	0.54407	1.4304	0.0656761	0.136233	1	5711	tags=58%, list=24%, signal=77%
YOSHIMURA_MAPK8_TARGETS_DN	YOSHIMURA_MAPK8_TARGETS_DN		347	0.335982	1.43034	0.000499625	0.136069	1	3978	tags=30%, list=17%, signal=36%
KOBAYASHI_EGFR_SIGNALING_24HR_UP	KOBAYASHI_EGFR_SIGNALING_24HR_UP		83	0.401603	1.43023	0.0208	0.135956	1	3328	tags=33%, list=14%, signal=38%
KARLSSON_TGFB1_TARGETS_DN	KARLSSON_TGFB1_TARGETS_DN		198	0.355856	1.43014	0.00312425	0.135824	1	4569	tags=40%, list=20%, signal=50%
PID_IGF1_PATHWAY	PID_IGF1_PATHWAY		29	0.49401	1.42991	0.0461306	0.135831	1	4328	tags=38%, list=18%, signal=46%
KEGG_DNA_REPLICATION	KEGG_DNA_REPLICATION		35	0.471925	1.42841	0.0434306	0.137079	1	3852	tags=37%, list=16%, signal=44%
MATTIOLI_MGUS_VS_MULTIPLE_MYELOMA	MATTIOLI_MGUS_VS_MULTIPLE_MYELOMA		16	0.567743	1.42829	0.0746746	0.136964	1	2326	tags=38%, list=10%, signal=42%
WIERENGA_STAT5A_TARGETS_GROUP2	WIERENGA_STAT5A_TARGETS_GROUP2		52	0.436336	1.42819	0.0309026	0.136838	1	2760	tags=25%, list=12%, signal=28%
REACTOME_FORMATION_OF_RNA_POL_II_ELONGATION_COMPLEX_	REACTOME_FORMATION_OF_RNA_POL_II_ELONGATION_COMPLEX_		35	0.474988	1.42796	0.0497491	0.136838	1	3239	tags=37%, list=14%, signal=43%
AFFAR_YY1_TARGETS_DN	AFFAR_YY1_TARGETS_DN		218	0.352827	1.42772	0.00271605	0.136852	1	4011	tags=31%, list=17%, signal=37%
MUNSHI_MULTIPLE_MYELOMA_UP	MUNSHI_MULTIPLE_MYELOMA_UP		77	0.406814	1.42502	0.02	0.139251	1	3967	tags=43%, list=17%, signal=51%
HOFMANN_MYELODYSPLASTIC_SYNDROM_LOW_RISK_DN	HOFMANN_MYELODYSPLASTIC_SYNDROM_LOW_RISK_DN		29	0.493143	1.42449	0.0482315	0.139562	1	3118	tags=31%, list=13%, signal=36%
SIMBULAN_UV_RESPONSE_IMMORTALIZED_DN	SIMBULAN_UV_RESPONSE_IMMORTALIZED_DN		31	0.485353	1.42422	0.0524611	0.139606	1	2942	tags=29%, list=13%, signal=33%
ACEVEDO_NORMAL_TISSUE_ADJACENT_TO_LIVER_TUMOR_UP	ACEVEDO_NORMAL_TISSUE_ADJACENT_TO_LIVER_TUMOR_UP		142	0.369005	1.42265	0.00912281	0.140919	1	4303	tags=35%, list=18%, signal=42%
AMIT_SERUM_RESPONSE_40_MCF10A	AMIT_SERUM_RESPONSE_40_MCF10A		30	0.482228	1.42206	0.0563688	0.141284	1	948	tags=23%, list=4%, signal=24%
SHEN_SMARCA2_TARGETS_UP	SHEN_SMARCA2_TARGETS_UP		393	0.329932	1.42177	0.000256016	0.141342	1	4791	tags=32%, list=20%, signal=40%
HOFFMANN_PRE_BI_TO_LARGE_PRE_BII_LYMPHOCYTE_DN	HOFFMANN_PRE_BI_TO_LARGE_PRE_BII_LYMPHOCYTE_DN		72	0.410999	1.42172	0.0229808	0.141177	1	2803	tags=33%, list=12%, signal=38%
LANDEMAINE_LUNG_METASTASIS	LANDEMAINE_LUNG_METASTASIS		18	0.549213	1.42075	0.0742163	0.141917	1	3920	tags=39%, list=17%, signal=47%
REACTOME_NUCLEOTIDE_EXCISION_REPAIR	REACTOME_NUCLEOTIDE_EXCISION_REPAIR		48	0.441216	1.42065	0.037944	0.141788	1	3537	tags=35%, list=15%, signal=42%
EPPERT_HSC_R	EPPERT_HSC_R		107	0.383039	1.42035	0.0137646	0.141851	1	2424	tags=24%, list=10%, signal=27%
RIGGINS_TAMOXIFEN_RESISTANCE_UP	RIGGINS_TAMOXIFEN_RESISTANCE_UP		64	0.418188	1.42031	0.0270091	0.141659	1	4087	tags=34%, list=17%, signal=42%
REACTOME_CTNNB1_PHOSPHORYLATION_CASCADE	REACTOME_CTNNB1_PHOSPHORYLATION_CASCADE		15	0.578091	1.41978	0.0833858	0.141968	1	4551	tags=67%, list=19%, signal=83%
RASHI_RESPONSE_TO_IONIZING_RADIATION_1	RASHI_RESPONSE_TO_IONIZING_RADIATION_1		40	0.454833	1.41861	0.0477348	0.142903	1	1941	tags=30%, list=8%, signal=33%
BENPORATH_MYC_TARGETS_WITH_EBOX	BENPORATH_MYC_TARGETS_WITH_EBOX		221	0.348066	1.41833	0.00384431	0.142975	1	5181	tags=38%, list=22%, signal=49%
XU_GH1_AUTOCRINE_TARGETS_UP	XU_GH1_AUTOCRINE_TARGETS_UP		216	0.349884	1.41768	0.00267315	0.143361	1	3999	tags=29%, list=17%, signal=35%
BLUM_RESPONSE_TO_SALIRASIB_UP	BLUM_RESPONSE_TO_SALIRASIB_UP		228	0.347442	1.41755	0.00148699	0.143271	1	5445	tags=39%, list=23%, signal=50%
JIANG_VHL_TARGETS	JIANG_VHL_TARGETS		122	0.375974	1.41608	0.0107905	0.144537	1	5191	tags=44%, list=22%, signal=57%
KEGG_RNA_DEGRADATION	KEGG_RNA_DEGRADATION		57	0.424656	1.41596	0.035746	0.144436	1	4576	tags=35%, list=20%, signal=44%
PID_P38_MK2_PATHWAY	PID_P38_MK2_PATHWAY		21	0.525174	1.41495	0.0666084	0.145232	1	4328	tags=38%, list=18%, signal=47%
FLECHNER_PBL_KIDNEY_TRANSPLANT_OK_VS_DONOR_DN	FLECHNER_PBL_KIDNEY_TRANSPLANT_OK_VS_DONOR_DN		41	0.45296	1.41475	0.0474412	0.145216	1	2349	tags=34%, list=10%, signal=38%
REACTOME_PERK_REGULATED_GENE_EXPRESSION	REACTOME_PERK_REGULATED_GENE_EXPRESSION		27	0.493671	1.41443	0.0653986	0.145313	1	2586	tags=26%, list=11%, signal=29%
NAKAMURA_METASTASIS	NAKAMURA_METASTASIS		42	0.451921	1.41426	0.0504808	0.145264	1	3994	tags=33%, list=17%, signal=40%
HOLLMANN_APOPTOSIS_VIA_CD40_DN	HOLLMANN_APOPTOSIS_VIA_CD40_DN		221	0.346932	1.41283	0.00394769	0.146502	1	3200	tags=27%, list=14%, signal=31%
TOOKER_GEMCITABINE_RESISTANCE_DN	TOOKER_GEMCITABINE_RESISTANCE_DN		116	0.376588	1.41219	0.0158066	0.146933	1	3954	tags=35%, list=17%, signal=42%
GAVIN_FOXP3_TARGETS_CLUSTER_P6	GAVIN_FOXP3_TARGETS_CLUSTER_P6		87	0.393579	1.41127	0.0197701	0.147624	1	3309	tags=34%, list=14%, signal=40%
PID_BETA_CATENIN_NUC_PATHWAY	PID_BETA_CATENIN_NUC_PATHWAY		78	0.401089	1.41028	0.0264201	0.148426	1	2361	tags=26%, list=10%, signal=28%
BOGNI_TREATMENT_RELATED_MYELOID_LEUKEMIA_UP	BOGNI_TREATMENT_RELATED_MYELOID_LEUKEMIA_UP		27	0.49501	1.40954	0.060477	0.148965	1	3544	tags=48%, list=15%, signal=57%
KEGG_CYSTEINE_AND_METHIONINE_METABOLISM	KEGG_CYSTEINE_AND_METHIONINE_METABOLISM		33	0.473275	1.40847	0.0574018	0.149848	1	6162	tags=48%, list=26%, signal=66%
RAMASWAMY_METASTASIS_UP	RAMASWAMY_METASTASIS_UP		63	0.415025	1.40792	0.03125	0.150205	1	5227	tags=41%, list=22%, signal=53%
AMIT_EGF_RESPONSE_480_MCF10A	AMIT_EGF_RESPONSE_480_MCF10A		41	0.449253	1.40774	0.0482744	0.150154	1	3854	tags=37%, list=16%, signal=44%
CREIGHTON_AKT1_SIGNALING_VIA_MTOR_DN	CREIGHTON_AKT1_SIGNALING_VIA_MTOR_DN		22	0.52119	1.40749	0.0687785	0.150176	1	3665	tags=41%, list=16%, signal=48%
MARSON_FOXP3_TARGETS_DN	MARSON_FOXP3_TARGETS_DN		50	0.434559	1.40702	0.0428729	0.150425	1	3237	tags=34%, list=14%, signal=39%
REACTOME_GOLGI_ASSOCIATED_VESICLE_BIOGENESIS	REACTOME_GOLGI_ASSOCIATED_VESICLE_BIOGENESIS		49	0.436284	1.40666	0.0403365	0.150576	1	3337	tags=29%, list=14%, signal=33%
SCIBETTA_KDM5B_TARGETS_DN	SCIBETTA_KDM5B_TARGETS_DN		70	0.406806	1.4066	0.0252525	0.150406	1	5613	tags=47%, list=24%, signal=62%
MARTINEZ_RESPONSE_TO_TRABECTEDIN_DN	MARTINEZ_RESPONSE_TO_TRABECTEDIN_DN		250	0.34149	1.40644	0.00218872	0.150344	1	5221	tags=37%, list=22%, signal=47%
ST_GA12_PATHWAY	ST_GA12_PATHWAY		23	0.5108	1.40642	0.0717182	0.15013	1	948	tags=26%, list=4%, signal=27%
LANDIS_ERBB2_BREAST_TUMORS_324_DN	LANDIS_ERBB2_BREAST_TUMORS_324_DN		140	0.36537	1.40601	0.010007	0.150334	1	3926	tags=32%, list=17%, signal=38%
ADDYA_ERYTHROID_DIFFERENTIATION_BY_HEMIN	ADDYA_ERYTHROID_DIFFERENTIATION_BY_HEMIN		64	0.414823	1.40586	0.0329064	0.150241	1	3317	tags=36%, list=14%, signal=42%
HUANG_GATA2_TARGETS_DN	HUANG_GATA2_TARGETS_DN		71	0.407895	1.40552	0.031243	0.150365	1	3256	tags=37%, list=14%, signal=42%
HWANG_PROSTATE_CANCER_MARKERS	HWANG_PROSTATE_CANCER_MARKERS		26	0.496921	1.40508	0.0650991	0.15062	1	4013	tags=38%, list=17%, signal=46%
IIZUKA_LIVER_CANCER_PROGRESSION_L0_L1_DN	IIZUKA_LIVER_CANCER_PROGRESSION_L0_L1_DN		19	0.536158	1.40478	0.0809777	0.150707	1	3859	tags=63%, list=16%, signal=76%
JIANG_AGING_CEREBRAL_CORTEX_UP	JIANG_AGING_CEREBRAL_CORTEX_UP		34	0.467916	1.40422	0.053027	0.151057	1	3883	tags=38%, list=17%, signal=46%
VERRECCHIA_RESPONSE_TO_TGFB1_C1	VERRECCHIA_RESPONSE_TO_TGFB1_C1		19	0.537356	1.40412	0.0783344	0.150934	1	1984	tags=26%, list=8%, signal=29%
REACTOME_TRANS_GOLGI_NETWORK_VESICLE_BUDDING	REACTOME_TRANS_GOLGI_NETWORK_VESICLE_BUDDING		54	0.4265	1.40403	0.0394537	0.150799	1	2935	tags=26%, list=13%, signal=30%
LOCKWOOD_AMPLIFIED_IN_LUNG_CANCER	LOCKWOOD_AMPLIFIED_IN_LUNG_CANCER		200	0.349366	1.40364	0.00335812	0.150949	1	4125	tags=35%, list=18%, signal=42%
WANG_LMO4_TARGETS_UP	WANG_LMO4_TARGETS_UP		317	0.332483	1.4027	0.00150754	0.151689	1	4184	tags=30%, list=18%, signal=36%
BERENJENO_TRANSFORMED_BY_RHOA_DN	BERENJENO_TRANSFORMED_BY_RHOA_DN		365	0.328236	1.40231	0.000509814	0.151873	1	4560	tags=36%, list=19%, signal=44%
REACTOME_PKB_MEDIATED_EVENTS	REACTOME_PKB_MEDIATED_EVENTS		28	0.487757	1.40226	0.0664351	0.151695	1	4956	tags=46%, list=21%, signal=59%
DAVIES_MULTIPLE_MYELOMA_VS_MGUS_DN	DAVIES_MULTIPLE_MYELOMA_VS_MGUS_DN		26	0.495121	1.40173	0.0683997	0.15202	1	3028	tags=38%, list=13%, signal=44%
REACTOME_LATE_PHASE_OF_HIV_LIFE_CYCLE	REACTOME_LATE_PHASE_OF_HIV_LIFE_CYCLE		92	0.387486	1.40099	0.0236727	0.152558	1	5568	tags=43%, list=24%, signal=57%
REACTOME_PYRUVATE_METABOLISM	REACTOME_PYRUVATE_METABOLISM		18	0.545962	1.40068	0.0825118	0.152646	1	2961	tags=50%, list=13%, signal=57%
BIOCARTA_HIF_PATHWAY	BIOCARTA_HIF_PATHWAY		15	0.569945	1.40068	0.0819011	0.152427	1	5181	tags=53%, list=22%, signal=68%
DAIRKEE_CANCER_PRONE_RESPONSE_E2	DAIRKEE_CANCER_PRONE_RESPONSE_E2		28	0.488172	1.4006	0.0593932	0.152283	1	3513	tags=39%, list=15%, signal=46%
LEE_TARGETS_OF_PTCH1_AND_SUFU_UP	LEE_TARGETS_OF_PTCH1_AND_SUFU_UP		49	0.434264	1.39946	0.0420938	0.153234	1	1290	tags=18%, list=6%, signal=19%
ENK_UV_RESPONSE_KERATINOCYTE_DN	ENK_UV_RESPONSE_KERATINOCYTE_DN		458	0.320305	1.39908	0	0.153403	1	5003	tags=35%, list=21%, signal=43%
KEGG_GALACTOSE_METABOLISM	KEGG_GALACTOSE_METABOLISM		25	0.501575	1.39893	0.0716113	0.153341	1	5143	tags=56%, list=22%, signal=72%
DITTMER_PTHLH_TARGETS_DN	DITTMER_PTHLH_TARGETS_DN		67	0.407951	1.39724	0.0330726	0.154901	1	4238	tags=36%, list=18%, signal=44%
ALCALAY_AML_BY_NPM1_LOCALIZATION_DN	ALCALAY_AML_BY_NPM1_LOCALIZATION_DN		172	0.35345	1.39716	0.00833135	0.154762	1	3852	tags=33%, list=16%, signal=39%
PEPPER_CHRONIC_LYMPHOCYTIC_LEUKEMIA_DN	PEPPER_CHRONIC_LYMPHOCYTIC_LEUKEMIA_DN		17	0.545273	1.39619	0.0867531	0.155539	1	3955	tags=53%, list=17%, signal=64%
BASSO_HAIRY_CELL_LEUKEMIA_UP	BASSO_HAIRY_CELL_LEUKEMIA_UP		76	0.397526	1.39532	0.0291328	0.156254	1	3500	tags=28%, list=15%, signal=32%
IIZUKA_LIVER_CANCER_PROGRESSION_L0_L1_UP	IIZUKA_LIVER_CANCER_PROGRESSION_L0_L1_UP		15	0.565833	1.39528	0.0911017	0.156067	1	1490	tags=20%, list=6%, signal=21%
BIOCARTA_CDC42RAC_PATHWAY	BIOCARTA_CDC42RAC_PATHWAY		16	0.556192	1.39513	0.0901605	0.156001	1	5715	tags=75%, list=24%, signal=99%
NUTT_GBM_VS_AO_GLIOMA_UP	NUTT_GBM_VS_AO_GLIOMA_UP		42	0.446664	1.39419	0.0533917	0.156766	1	3704	tags=43%, list=16%, signal=51%
LIU_CMYB_TARGETS_UP	LIU_CMYB_TARGETS_UP		143	0.360629	1.39291	0.0116414	0.157911	1	3983	tags=30%, list=17%, signal=36%
DELPUECH_FOXO3_TARGETS_DN	DELPUECH_FOXO3_TARGETS_DN		39	0.449613	1.39261	0.0531915	0.15799	1	5091	tags=54%, list=22%, signal=69%
KEGG_PATHOGENIC_ESCHERICHIA_COLI_INFECTION	KEGG_PATHOGENIC_ESCHERICHIA_COLI_INFECTION		50	0.430631	1.3923	0.0426561	0.15811	1	3078	tags=38%, list=13%, signal=44%
REACTOME_PLATELET_SENSITIZATION_BY_LDL	REACTOME_PLATELET_SENSITIZATION_BY_LDL		16	0.557628	1.39222	0.0952077	0.157953	1	4767	tags=56%, list=20%, signal=71%
SHAFFER_IRF4_TARGETS_IN_ACTIVATED_B_LYMPHOCYTE	SHAFFER_IRF4_TARGETS_IN_ACTIVATED_B_LYMPHOCYTE		74	0.399249	1.39222	0.0311171	0.157734	1	3108	tags=31%, list=13%, signal=36%
LIN_MELANOMA_COPY_NUMBER_UP	LIN_MELANOMA_COPY_NUMBER_UP		65	0.407102	1.39113	0.0356824	0.158668	1	3794	tags=37%, list=16%, signal=44%
PID_SYNDECAN_4_PATHWAY	PID_SYNDECAN_4_PATHWAY		32	0.468749	1.3911	0.0640693	0.158471	1	3289	tags=34%, list=14%, signal=40%
JIANG_HYPOXIA_VIA_VHL	JIANG_HYPOXIA_VIA_VHL		32	0.472724	1.39063	0.0607568	0.158751	1	5117	tags=47%, list=22%, signal=60%
HOLLMANN_APOPTOSIS_VIA_CD40_UP	HOLLMANN_APOPTOSIS_VIA_CD40_UP		184	0.348953	1.3894	0.00851996	0.159869	1	5075	tags=38%, list=22%, signal=47%
WENG_POR_TARGETS_GLOBAL_DN	WENG_POR_TARGETS_GLOBAL_DN		23	0.509134	1.38925	0.0763583	0.159802	1	6165	tags=61%, list=26%, signal=83%
BURTON_ADIPOGENESIS_8	BURTON_ADIPOGENESIS_8		81	0.391045	1.38864	0.0274589	0.160238	1	2472	tags=27%, list=11%, signal=30%
REACTOME_ERK_MAPK_TARGETS	REACTOME_ERK_MAPK_TARGETS		21	0.516468	1.38861	0.0833509	0.16004	1	338	tags=19%, list=1%, signal=19%
DEMAGALHAES_AGING_UP	DEMAGALHAES_AGING_UP		48	0.430352	1.38846	0.0470361	0.15998	1	2962	tags=42%, list=13%, signal=48%
REACTOME_ARMS_MEDIATED_ACTIVATION	REACTOME_ARMS_MEDIATED_ACTIVATION		16	0.554119	1.38781	0.0939497	0.160444	1	2985	tags=38%, list=13%, signal=43%
ZHENG_GLIOBLASTOMA_PLASTICITY_UP	ZHENG_GLIOBLASTOMA_PLASTICITY_UP		234	0.339618	1.38711	0.00424894	0.16098	1	4610	tags=33%, list=20%, signal=41%
MUELLER_COMMON_TARGETS_OF_AML_FUSIONS_DN	MUELLER_COMMON_TARGETS_OF_AML_FUSIONS_DN		29	0.476983	1.38698	0.0649351	0.160894	1	1934	tags=21%, list=8%, signal=23%
REACTOME_NUCLEAR_EVENTS_KINASE_AND_TRANSCRIPTION_FACTOR_ACTIVATION	REACTOME_NUCLEAR_EVENTS_KINASE_AND_TRANSCRIPTION_FACTOR_ACTIVATION		24	0.503148	1.38662	0.0753084	0.161058	1	338	tags=17%, list=1%, signal=17%
PID_FOXM1_PATHWAY	PID_FOXM1_PATHWAY		40	0.447912	1.38595	0.0553739	0.161551	1	2338	tags=35%, list=10%, signal=39%
NIKOLSKY_BREAST_CANCER_11Q12_Q14_AMPLICON	NIKOLSKY_BREAST_CANCER_11Q12_Q14_AMPLICON		141	0.36067	1.38536	0.0137337	0.161953	1	2865	tags=23%, list=12%, signal=26%
REACTOME_SIGNALLING_TO_RAS	REACTOME_SIGNALLING_TO_RAS		26	0.49088	1.3847	0.0758977	0.162445	1	7606	tags=58%, list=32%, signal=85%
CAVARD_LIVER_CANCER_MALIGNANT_VS_BENIGN	CAVARD_LIVER_CANCER_MALIGNANT_VS_BENIGN		25	0.492841	1.38427	0.0782872	0.162682	1	712	tags=28%, list=3%, signal=29%
SEIDEN_ONCOGENESIS_BY_MET	SEIDEN_ONCOGENESIS_BY_MET		81	0.391816	1.38395	0.0319149	0.162823	1	5242	tags=46%, list=22%, signal=59%
REACTOME_TRANSCRIPTION_COUPLED_NER_TC_NER	REACTOME_TRANSCRIPTION_COUPLED_NER_TC_NER		43	0.437534	1.38348	0.0497153	0.163128	1	3175	tags=33%, list=14%, signal=38%
ZHAN_LATE_DIFFERENTIATION_GENES_DN	ZHAN_LATE_DIFFERENTIATION_GENES_DN		15	0.561501	1.38329	0.0981092	0.163091	1	459	tags=20%, list=2%, signal=20%
REACTOME_SIGNALING_BY_INSULIN_RECEPTOR	REACTOME_SIGNALING_BY_INSULIN_RECEPTOR		101	0.376869	1.38296	0.0233959	0.16323	1	4956	tags=35%, list=21%, signal=44%
REACTOME_INHIBITION_OF_THE_PROTEOLYTIC_ACTIVITY_OF_APC_C_REQUIRED_FOR_THE_ONSET_OF_ANAPHASE_BY_MITOTIC_SPINDLE_CHECKPOINT_COMPONENTS	REACTOME_INHIBITION_OF_THE_PROTEOLYTIC_ACTIVITY_OF_APC_C_REQUIRED_FOR_THE_ONSET_OF_ANAPHASE_BY_MITOTIC_SPINDLE_CHECKPOINT_COMPONENTS		18	0.531128	1.38182	0.0918544	0.164259	1	5711	tags=56%, list=24%, signal=73%
GROSS_HYPOXIA_VIA_ELK3_AND_HIF1A_UP	GROSS_HYPOXIA_VIA_ELK3_AND_HIF1A_UP		137	0.360567	1.37987	0.0151122	0.166199	1	2145	tags=22%, list=9%, signal=24%
KEGG_RENIN_ANGIOTENSIN_SYSTEM	KEGG_RENIN_ANGIOTENSIN_SYSTEM		15	0.560314	1.37973	0.101038	0.166129	1	2369	tags=33%, list=10%, signal=37%
MOREIRA_RESPONSE_TO_TSA_UP	MOREIRA_RESPONSE_TO_TSA_UP		27	0.48637	1.3797	0.07231	0.165926	1	3810	tags=44%, list=16%, signal=53%
KUUSELO_PANCREATIC_CANCER_19Q13_AMPLIFICATION	KUUSELO_PANCREATIC_CANCER_19Q13_AMPLIFICATION		20	0.519907	1.37958	0.0893128	0.165832	1	1510	tags=30%, list=6%, signal=32%
REACTOME_DESTABILIZATION_OF_MRNA_BY_KSRP	REACTOME_DESTABILIZATION_OF_MRNA_BY_KSRP		17	0.542817	1.37906	0.093132	0.166199	1	2255	tags=29%, list=10%, signal=33%
BURTON_ADIPOGENESIS_9	BURTON_ADIPOGENESIS_9		87	0.385787	1.3787	0.0290083	0.166372	1	1726	tags=18%, list=7%, signal=20%
PID_ILK_PATHWAY	PID_ILK_PATHWAY		44	0.435059	1.37832	0.058193	0.166579	1	3828	tags=32%, list=16%, signal=38%
TONKS_TARGETS_OF_RUNX1_RUNX1T1_FUSION_SUSTAINDED_IN_ERYTHROCYTE_UP	TONKS_TARGETS_OF_RUNX1_RUNX1T1_FUSION_SUSTAINDED_IN_ERYTHROCYTE_UP		41	0.441446	1.3779	0.0593387	0.166812	1	800	tags=17%, list=3%, signal=18%
RASHI_RESPONSE_TO_IONIZING_RADIATION_4	RASHI_RESPONSE_TO_IONIZING_RADIATION_4		53	0.420013	1.37787	0.0476085	0.166616	1	3634	tags=34%, list=16%, signal=40%
NAKAMURA_METASTASIS_MODEL_UP	NAKAMURA_METASTASIS_MODEL_UP		40	0.44346	1.37783	0.0664444	0.16643	1	5536	tags=50%, list=24%, signal=65%
REACTOME_LIPID_DIGESTION_MOBILIZATION_AND_TRANSPORT	REACTOME_LIPID_DIGESTION_MOBILIZATION_AND_TRANSPORT		42	0.438373	1.37767	0.0627977	0.166391	1	2523	tags=24%, list=11%, signal=27%
ZHU_CMV_ALL_DN	ZHU_CMV_ALL_DN		117	0.365853	1.37447	0.0149528	0.169721	1	2561	tags=23%, list=11%, signal=26%
FLECHNER_PBL_KIDNEY_TRANSPLANT_REJECTED_VS_OK_DN	FLECHNER_PBL_KIDNEY_TRANSPLANT_REJECTED_VS_OK_DN		49	0.424707	1.37441	0.0522205	0.169555	1	4539	tags=43%, list=19%, signal=53%
KYNG_DNA_DAMAGE_BY_GAMMA_AND_UV_RADIATION	KYNG_DNA_DAMAGE_BY_GAMMA_AND_UV_RADIATION		84	0.385494	1.37437	0.0330766	0.169375	1	4869	tags=37%, list=21%, signal=46%
JOHNSTONE_PARVB_TARGETS_2_DN	JOHNSTONE_PARVB_TARGETS_2_DN		307	0.327268	1.37316	0.00149291	0.170514	1	4679	tags=35%, list=20%, signal=43%
LIU_VMYB_TARGETS_UP	LIU_VMYB_TARGETS_UP		113	0.366508	1.37248	0.0227748	0.171058	1	2941	tags=25%, list=13%, signal=28%
BARIS_THYROID_CANCER_DN	BARIS_THYROID_CANCER_DN		58	0.409677	1.37219	0.0438982	0.17115	1	2461	tags=24%, list=11%, signal=27%
RICKMAN_TUMOR_DIFFERENTIATED_WELL_VS_POORLY_UP	RICKMAN_TUMOR_DIFFERENTIATED_WELL_VS_POORLY_UP		210	0.339048	1.36979	0.0104293	0.173654	1	5236	tags=39%, list=22%, signal=50%
REACTOME_RAS_ACTIVATION_UOPN_CA2_INFUX_THROUGH_NMDA_RECEPTOR	REACTOME_RAS_ACTIVATION_UOPN_CA2_INFUX_THROUGH_NMDA_RECEPTOR		16	0.546803	1.36844	0.103108	0.174981	1	3311	tags=38%, list=14%, signal=44%
MORI_PLASMA_CELL_UP	MORI_PLASMA_CELL_UP		49	0.423605	1.36729	0.0559858	0.176078	1	4345	tags=45%, list=19%, signal=55%
BIOCARTA_CARM_ER_PATHWAY	BIOCARTA_CARM_ER_PATHWAY		34	0.457217	1.36532	0.0716371	0.178149	1	3387	tags=29%, list=14%, signal=34%
SMIRNOV_CIRCULATING_ENDOTHELIOCYTES_IN_CANCER_UP	SMIRNOV_CIRCULATING_ENDOTHELIOCYTES_IN_CANCER_UP		147	0.353701	1.36466	0.016961	0.178704	1	3035	tags=27%, list=13%, signal=31%
ZHANG_TLX_TARGETS_60HR_UP	ZHANG_TLX_TARGETS_60HR_UP		275	0.327106	1.36407	0.00277778	0.179162	1	4370	tags=32%, list=19%, signal=39%
TAYLOR_METHYLATED_IN_ACUTE_LYMPHOBLASTIC_LEUKEMIA	TAYLOR_METHYLATED_IN_ACUTE_LYMPHOBLASTIC_LEUKEMIA		71	0.395041	1.36386	0.043343	0.17918	1	2340	tags=25%, list=10%, signal=28%
PANGAS_TUMOR_SUPPRESSION_BY_SMAD1_AND_SMAD5_DN	PANGAS_TUMOR_SUPPRESSION_BY_SMAD1_AND_SMAD5_DN		145	0.352444	1.36359	0.0155705	0.17924	1	2961	tags=22%, list=13%, signal=25%
IIZUKA_LIVER_CANCER_PROGRESSION_G1_G2_DN	IIZUKA_LIVER_CANCER_PROGRESSION_G1_G2_DN		22	0.501341	1.36323	0.091524	0.179427	1	3950	tags=36%, list=17%, signal=44%
MCGOWAN_RSP6_TARGETS_UP	MCGOWAN_RSP6_TARGETS_UP		17	0.538518	1.36299	0.101287	0.179466	1	2143	tags=29%, list=9%, signal=32%
CHIARADONNA_NEOPLASTIC_TRANSFORMATION_KRAS_UP	CHIARADONNA_NEOPLASTIC_TRANSFORMATION_KRAS_UP		120	0.363381	1.36291	0.0238868	0.179316	1	3287	tags=27%, list=14%, signal=31%
LIANG_HEMATOPOIESIS_STEM_CELL_NUMBER_SMALL_VS_HUGE_UP	LIANG_HEMATOPOIESIS_STEM_CELL_NUMBER_SMALL_VS_HUGE_UP		36	0.449819	1.36258	0.0743243	0.179474	1	1961	tags=31%, list=8%, signal=33%
HOEGERKORP_CD44_TARGETS_TEMPORAL_DN	HOEGERKORP_CD44_TARGETS_TEMPORAL_DN		22	0.506541	1.36191	0.094926	0.180024	1	4779	tags=45%, list=20%, signal=57%
KARLSSON_TGFB1_TARGETS_UP	KARLSSON_TGFB1_TARGETS_UP		120	0.361535	1.36191	0.0254951	0.179784	1	5191	tags=38%, list=22%, signal=48%
RIZ_ERYTHROID_DIFFERENTIATION	RIZ_ERYTHROID_DIFFERENTIATION		74	0.391031	1.36152	0.0393082	0.180012	1	3852	tags=32%, list=16%, signal=39%
BIOCARTA_BCR_PATHWAY	BIOCARTA_BCR_PATHWAY		33	0.45823	1.36148	0.0675793	0.179825	1	1953	tags=27%, list=8%, signal=30%
VANLOO_SP3_TARGETS_DN	VANLOO_SP3_TARGETS_DN		81	0.385893	1.36115	0.0391762	0.179964	1	4476	tags=41%, list=19%, signal=50%
SCHLOSSER_MYC_TARGETS_AND_SERUM_RESPONSE_DN	SCHLOSSER_MYC_TARGETS_AND_SERUM_RESPONSE_DN		46	0.427433	1.36092	0.0580687	0.179996	1	4080	tags=37%, list=17%, signal=45%
AGUIRRE_PANCREATIC_CANCER_COPY_NUMBER_DN	AGUIRRE_PANCREATIC_CANCER_COPY_NUMBER_DN		220	0.335099	1.36077	0.00838264	0.179929	1	4440	tags=34%, list=19%, signal=41%
REACTOME_REGULATORY_RNA_PATHWAYS	REACTOME_REGULATORY_RNA_PATHWAYS		25	0.485497	1.36042	0.0899288	0.180106	1	3175	tags=36%, list=14%, signal=42%
HELLER_HDAC_TARGETS_SILENCED_BY_METHYLATION_UP	HELLER_HDAC_TARGETS_SILENCED_BY_METHYLATION_UP		395	0.316521	1.3601	0.00131926	0.180241	1	3856	tags=27%, list=16%, signal=31%
KIM_WT1_TARGETS_8HR_DN	KIM_WT1_TARGETS_8HR_DN		109	0.364929	1.35975	0.0292809	0.180413	1	5459	tags=42%, list=23%, signal=55%
IVANOVA_HEMATOPOIESIS_STEM_CELL_SHORT_TERM	IVANOVA_HEMATOPOIESIS_STEM_CELL_SHORT_TERM		30	0.462763	1.35974	0.0854108	0.180193	1	119	tags=7%, list=1%, signal=7%
GRABARCZYK_BCL11B_TARGETS_DN	GRABARCZYK_BCL11B_TARGETS_DN		52	0.412497	1.35949	0.0620292	0.180243	1	2162	tags=15%, list=9%, signal=17%
BYSTRYKH_HEMATOPOIESIS_STEM_CELL_QTL_CIS	BYSTRYKH_HEMATOPOIESIS_STEM_CELL_QTL_CIS		110	0.367421	1.35941	0.0258522	0.180104	1	2549	tags=26%, list=11%, signal=29%
SAMOLS_TARGETS_OF_KHSV_MIRNAS_DN	SAMOLS_TARGETS_OF_KHSV_MIRNAS_DN		54	0.411851	1.35935	0.057201	0.17994	1	1793	tags=24%, list=8%, signal=26%
SUNG_METASTASIS_STROMA_UP	SUNG_METASTASIS_STROMA_UP		99	0.370475	1.35831	0.0322065	0.180923	1	2424	tags=23%, list=10%, signal=26%
OUELLET_CULTURED_OVARIAN_CANCER_INVASIVE_VS_LMP_UP	OUELLET_CULTURED_OVARIAN_CANCER_INVASIVE_VS_LMP_UP		66	0.398776	1.35718	0.0497898	0.182027	1	5167	tags=44%, list=22%, signal=56%
JIANG_HYPOXIA_NORMAL	JIANG_HYPOXIA_NORMAL		289	0.324111	1.35565	0.00649675	0.183622	1	5018	tags=37%, list=21%, signal=47%
GROSS_HYPOXIA_VIA_ELK3_ONLY_DN	GROSS_HYPOXIA_VIA_ELK3_ONLY_DN		40	0.436314	1.35549	0.0735294	0.183583	1	2777	tags=38%, list=12%, signal=42%
KEGG_UBIQUITIN_MEDIATED_PROTEOLYSIS	KEGG_UBIQUITIN_MEDIATED_PROTEOLYSIS		129	0.356369	1.35474	0.0243154	0.184231	1	4465	tags=32%, list=19%, signal=39%
BIOCARTA_INTEGRIN_PATHWAY	BIOCARTA_INTEGRIN_PATHWAY		37	0.445044	1.35249	0.0751947	0.186719	1	1653	tags=19%, list=7%, signal=20%
MAHAJAN_RESPONSE_TO_IL1A_UP	MAHAJAN_RESPONSE_TO_IL1A_UP		77	0.386911	1.35246	0.0419872	0.186519	1	2961	tags=23%, list=13%, signal=27%
BLALOCK_ALZHEIMERS_DISEASE_INCIPIENT_DN	BLALOCK_ALZHEIMERS_DISEASE_INCIPIENT_DN		157	0.345671	1.35201	0.0155242	0.186804	1	3490	tags=31%, list=15%, signal=36%
NADLER_HYPERGLYCEMIA_AT_OBESITY	NADLER_HYPERGLYCEMIA_AT_OBESITY		57	0.407448	1.3519	0.0556529	0.186697	1	3093	tags=28%, list=13%, signal=32%
REACTOME_CTLA4_INHIBITORY_SIGNALING	REACTOME_CTLA4_INHIBITORY_SIGNALING		21	0.503328	1.3511	0.101892	0.187449	1	5003	tags=48%, list=21%, signal=61%
LEI_MYB_TARGETS	LEI_MYB_TARGETS		293	0.322546	1.35058	0.00577599	0.187834	1	4128	tags=32%, list=18%, signal=38%
AMIT_EGF_RESPONSE_40_MCF10A	AMIT_EGF_RESPONSE_40_MCF10A		19	0.514122	1.35031	0.109188	0.187914	1	2745	tags=32%, list=12%, signal=36%
FARMER_BREAST_CANCER_BASAL_VS_LULMINAL	FARMER_BREAST_CANCER_BASAL_VS_LULMINAL		304	0.321384	1.34949	0.00402921	0.188685	1	3055	tags=24%, list=13%, signal=27%
KANNAN_TP53_TARGETS_DN	KANNAN_TP53_TARGETS_DN		21	0.502649	1.34807	0.10636	0.190213	1	4091	tags=43%, list=17%, signal=52%
KEGG_PORPHYRIN_AND_CHLOROPHYLL_METABOLISM	KEGG_PORPHYRIN_AND_CHLOROPHYLL_METABOLISM		29	0.464433	1.34794	0.0816371	0.190123	1	2892	tags=31%, list=12%, signal=35%
EPPERT_CE_HSC_LSC	EPPERT_CE_HSC_LSC		37	0.43985	1.34791	0.0788318	0.189917	1	352	tags=19%, list=2%, signal=19%
HERNANDEZ_MITOTIC_ARREST_BY_DOCETAXEL_2_DN	HERNANDEZ_MITOTIC_ARREST_BY_DOCETAXEL_2_DN		16	0.538713	1.3472	0.107649	0.190558	1	1547	tags=25%, list=7%, signal=27%
REACTOME_EXTENSION_OF_TELOMERES	REACTOME_EXTENSION_OF_TELOMERES		27	0.470512	1.34706	0.0870039	0.190486	1	3986	tags=41%, list=17%, signal=49%
REACTOME_PROSTACYCLIN_SIGNALLING_THROUGH_PROSTACYCLIN_RECEPTOR	REACTOME_PROSTACYCLIN_SIGNALLING_THROUGH_PROSTACYCLIN_RECEPTOR		19	0.512205	1.3468	0.105745	0.190564	1	3419	tags=42%, list=15%, signal=49%
SASSON_RESPONSE_TO_FORSKOLIN_UP	SASSON_RESPONSE_TO_FORSKOLIN_UP		86	0.37712	1.34573	0.03945	0.191624	1	5013	tags=43%, list=21%, signal=55%
SCHAEFFER_PROSTATE_DEVELOPMENT_6HR_DN	SCHAEFFER_PROSTATE_DEVELOPMENT_6HR_DN		468	0.30893	1.34519	0.00186567	0.192068	1	3778	tags=27%, list=16%, signal=31%
CHICAS_RB1_TARGETS_SENESCENT	CHICAS_RB1_TARGETS_SENESCENT		500	0.306533	1.34384	0.00107556	0.193479	1	3730	tags=28%, list=16%, signal=33%
KEGG_VIRAL_MYOCARDITIS	KEGG_VIRAL_MYOCARDITIS		50	0.415337	1.34361	0.0629745	0.193531	1	2765	tags=18%, list=12%, signal=20%
HOFFMANN_SMALL_PRE_BII_TO_IMMATURE_B_LYMPHOCYTE_DN	HOFFMANN_SMALL_PRE_BII_TO_IMMATURE_B_LYMPHOCYTE_DN		46	0.419422	1.3424	0.0688144	0.194779	1	5966	tags=43%, list=25%, signal=58%
JEON_SMAD6_TARGETS_DN	JEON_SMAD6_TARGETS_DN		18	0.520133	1.34056	0.123942	0.196815	1	4239	tags=44%, list=18%, signal=54%
PUJANA_BREAST_CANCER_WITH_BRCA1_MUTATED_UP	PUJANA_BREAST_CANCER_WITH_BRCA1_MUTATED_UP		54	0.406441	1.33836	0.0621242	0.199358	1	5079	tags=39%, list=22%, signal=50%
VANDESLUIS_NORMAL_EMBRYOS_DN	VANDESLUIS_NORMAL_EMBRYOS_DN		20	0.505273	1.3381	0.103893	0.199412	1	1249	tags=25%, list=5%, signal=26%
NAKAMURA_CANCER_MICROENVIRONMENT_DN	NAKAMURA_CANCER_MICROENVIRONMENT_DN		44	0.42084	1.33787	0.0743544	0.19946	1	4204	tags=39%, list=18%, signal=47%
LIANG_HEMATOPOIESIS_STEM_CELL_NUMBER_SMALL_VS_HUGE_DN	LIANG_HEMATOPOIESIS_STEM_CELL_NUMBER_SMALL_VS_HUGE_DN		31	0.455192	1.33756	0.0881349	0.199603	1	3606	tags=35%, list=15%, signal=42%
HUMMERICH_MALIGNANT_SKIN_TUMOR_UP	HUMMERICH_MALIGNANT_SKIN_TUMOR_UP		15	0.543565	1.33734	0.116938	0.199633	1	3809	tags=47%, list=16%, signal=56%
VANDESLUIS_COMMD1_TARGETS_GROUP_3_UP	VANDESLUIS_COMMD1_TARGETS_GROUP_3_UP		84	0.376066	1.33708	0.0441308	0.199723	1	3275	tags=29%, list=14%, signal=33%
BRUECKNER_TARGETS_OF_MIRLET7A3_DN	BRUECKNER_TARGETS_OF_MIRLET7A3_DN		67	0.386688	1.33694	0.0536704	0.199648	1	3788	tags=31%, list=16%, signal=37%
PEDERSEN_METASTASIS_BY_ERBB2_ISOFORM_3	PEDERSEN_METASTASIS_BY_ERBB2_ISOFORM_3		18	0.515695	1.3359	0.116085	0.200701	1	3057	tags=33%, list=13%, signal=38%
KORKOLA_SEMINOMA_UP	KORKOLA_SEMINOMA_UP		39	0.431756	1.33565	0.0823144	0.200773	1	1721	tags=31%, list=7%, signal=33%
CROONQUIST_NRAS_VS_STROMAL_STIMULATION_DN	CROONQUIST_NRAS_VS_STROMAL_STIMULATION_DN		94	0.366143	1.33556	0.0395972	0.200635	1	3883	tags=39%, list=17%, signal=47%
REACTOME_KERATAN_SULFATE_BIOSYNTHESIS	REACTOME_KERATAN_SULFATE_BIOSYNTHESIS		25	0.480622	1.33542	0.100876	0.200566	1	2674	tags=40%, list=11%, signal=45%
YAO_TEMPORAL_RESPONSE_TO_PROGESTERONE_CLUSTER_9	YAO_TEMPORAL_RESPONSE_TO_PROGESTERONE_CLUSTER_9		69	0.387537	1.33481	0.0517778	0.201088	1	3337	tags=35%, list=14%, signal=40%
PID_NFKAPPAB_CANONICAL_PATHWAY	PID_NFKAPPAB_CANONICAL_PATHWAY		23	0.491289	1.33458	0.106342	0.201127	1	4465	tags=35%, list=19%, signal=43%
BILD_SRC_ONCOGENIC_SIGNATURE	BILD_SRC_ONCOGENIC_SIGNATURE		57	0.399964	1.33445	0.0649584	0.201035	1	4053	tags=39%, list=17%, signal=47%
ACEVEDO_LIVER_CANCER_DN	ACEVEDO_LIVER_CANCER_DN		472	0.305747	1.33425	0.00161334	0.201026	1	5262	tags=33%, list=22%, signal=41%
ASTON_MAJOR_DEPRESSIVE_DISORDER_UP	ASTON_MAJOR_DEPRESSIVE_DISORDER_UP		41	0.427866	1.33383	0.0798694	0.201297	1	4491	tags=39%, list=19%, signal=48%
SEMENZA_HIF1_TARGETS	SEMENZA_HIF1_TARGETS		33	0.444923	1.33378	0.0949529	0.201111	1	3153	tags=27%, list=13%, signal=31%
BANDRES_RESPONSE_TO_CARMUSTIN_WITHOUT_MGMT_48HR_DN	BANDRES_RESPONSE_TO_CARMUSTIN_WITHOUT_MGMT_48HR_DN		29	0.45937	1.33374	0.0998264	0.200916	1	2404	tags=21%, list=10%, signal=23%
REACTOME_DNA_REPAIR	REACTOME_DNA_REPAIR		101	0.364142	1.33369	0.0414651	0.200725	1	3175	tags=26%, list=14%, signal=30%
REACTOME_CREB_PHOSPHORYLATION_THROUGH_THE_ACTIVATION_OF_CAMKII	REACTOME_CREB_PHOSPHORYLATION_THROUGH_THE_ACTIVATION_OF_CAMKII		15	0.53795	1.33364	0.124233	0.200543	1	2742	tags=33%, list=12%, signal=38%
MA_MYELOID_DIFFERENTIATION_DN	MA_MYELOID_DIFFERENTIATION_DN		44	0.419919	1.33325	0.0757876	0.20081	1	2273	tags=27%, list=10%, signal=30%
MAYBURD_RESPONSE_TO_L663536_DN	MAYBURD_RESPONSE_TO_L663536_DN		48	0.413745	1.33286	0.0720264	0.201044	1	3741	tags=38%, list=16%, signal=45%
REACTOME_DESTABILIZATION_OF_MRNA_BY_TRISTETRAPROLIN_TTP	REACTOME_DESTABILIZATION_OF_MRNA_BY_TRISTETRAPROLIN_TTP		17	0.526672	1.33276	0.114268	0.200927	1	2949	tags=35%, list=13%, signal=40%
MONNIER_POSTRADIATION_TUMOR_ESCAPE_DN	MONNIER_POSTRADIATION_TUMOR_ESCAPE_DN		338	0.31394	1.33268	0.00467654	0.200774	1	3615	tags=28%, list=15%, signal=32%
TAKEDA_TARGETS_OF_NUP98_HOXA9_FUSION_3D_DN	TAKEDA_TARGETS_OF_NUP98_HOXA9_FUSION_3D_DN		27	0.468341	1.33118	0.0992432	0.202494	1	3680	tags=44%, list=16%, signal=53%
PID_MYC_ACTIV_PATHWAY	PID_MYC_ACTIV_PATHWAY		77	0.378846	1.33105	0.0534111	0.202415	1	3829	tags=34%, list=16%, signal=40%
PID_NFKAPPAB_ATYPICAL_PATHWAY	PID_NFKAPPAB_ATYPICAL_PATHWAY		17	0.524749	1.33025	0.1254	0.203191	1	4238	tags=35%, list=18%, signal=43%
NADLER_OBESITY_DN	NADLER_OBESITY_DN		46	0.417691	1.32954	0.0769738	0.203852	1	2921	tags=30%, list=12%, signal=35%
GARGALOVIC_RESPONSE_TO_OXIDIZED_PHOSPHOLIPIDS_TURQUOISE_DN	GARGALOVIC_RESPONSE_TO_OXIDIZED_PHOSPHOLIPIDS_TURQUOISE_DN		46	0.416939	1.3295	0.0756851	0.203652	1	5800	tags=50%, list=25%, signal=66%
PID_RAC1_PATHWAY	PID_RAC1_PATHWAY		54	0.402197	1.32932	0.0708714	0.203634	1	5885	tags=46%, list=25%, signal=62%
LEE_METASTASIS_AND_RNA_PROCESSING_UP	LEE_METASTASIS_AND_RNA_PROCESSING_UP		17	0.521284	1.32808	0.123486	0.205003	1	8068	tags=71%, list=34%, signal=108%
PID_INTEGRIN_A4B1_PATHWAY	PID_INTEGRIN_A4B1_PATHWAY		33	0.443211	1.32701	0.0896309	0.206161	1	3078	tags=30%, list=13%, signal=35%
PASQUALUCCI_LYMPHOMA_BY_GC_STAGE_DN	PASQUALUCCI_LYMPHOMA_BY_GC_STAGE_DN		154	0.339973	1.32679	0.0234687	0.206172	1	2942	tags=27%, list=13%, signal=30%
WATANABE_COLON_CANCER_MSI_VS_MSS_UP	WATANABE_COLON_CANCER_MSI_VS_MSS_UP		25	0.472109	1.32582	0.106213	0.207203	1	3015	tags=32%, list=13%, signal=37%
PARK_HSC_MARKERS	PARK_HSC_MARKERS		43	0.421852	1.32546	0.0815836	0.207405	1	4357	tags=35%, list=19%, signal=43%
IVANOVA_HEMATOPOIESIS_MATURE_CELL	IVANOVA_HEMATOPOIESIS_MATURE_CELL		261	0.320585	1.32541	0.0104623	0.207223	1	4612	tags=35%, list=20%, signal=43%
SASSON_RESPONSE_TO_GONADOTROPHINS_UP	SASSON_RESPONSE_TO_GONADOTROPHINS_UP		85	0.370858	1.32517	0.0486425	0.207292	1	5013	tags=41%, list=21%, signal=52%
KEGG_STEROID_HORMONE_BIOSYNTHESIS	KEGG_STEROID_HORMONE_BIOSYNTHESIS		32	0.447215	1.3249	0.102957	0.207384	1	1648	tags=16%, list=7%, signal=17%
SHAFFER_IRF4_TARGETS_IN_MYELOMA_VS_MATURE_B_LYMPHOCYTE	SHAFFER_IRF4_TARGETS_IN_MYELOMA_VS_MATURE_B_LYMPHOCYTE		98	0.362455	1.32485	0.0436066	0.207203	1	4313	tags=37%, list=18%, signal=45%
FARMER_BREAST_CANCER_CLUSTER_6	FARMER_BREAST_CANCER_CLUSTER_6		15	0.538172	1.32396	0.130615	0.20811	1	510	tags=20%, list=2%, signal=20%
PID_ATR_PATHWAY	PID_ATR_PATHWAY		39	0.428709	1.32258	0.0901604	0.209658	1	4328	tags=36%, list=18%, signal=44%
MARKS_HDAC_TARGETS_DN	MARKS_HDAC_TARGETS_DN		15	0.536747	1.32228	0.135597	0.209807	1	1937	tags=27%, list=8%, signal=29%
KIM_GASTRIC_CANCER_CHEMOSENSITIVITY	KIM_GASTRIC_CANCER_CHEMOSENSITIVITY		92	0.364096	1.32225	0.043318	0.209585	1	4353	tags=36%, list=19%, signal=44%
RUTELLA_RESPONSE_TO_HGF_UP	RUTELLA_RESPONSE_TO_HGF_UP		368	0.30877	1.3218	0.00573813	0.209937	1	2745	tags=23%, list=12%, signal=25%
CREIGHTON_ENDOCRINE_THERAPY_RESISTANCE_1	CREIGHTON_ENDOCRINE_THERAPY_RESISTANCE_1		468	0.303116	1.32008	0.00184599	0.21198	1	4418	tags=33%, list=19%, signal=40%
GAJATE_RESPONSE_TO_TRABECTEDIN_DN	GAJATE_RESPONSE_TO_TRABECTEDIN_DN		19	0.499858	1.31943	0.119492	0.212594	1	3637	tags=32%, list=16%, signal=37%
NAKAYAMA_SOFT_TISSUE_TUMORS_PCA2_UP	NAKAYAMA_SOFT_TISSUE_TUMORS_PCA2_UP		82	0.371602	1.31901	0.0547852	0.212886	1	4260	tags=38%, list=18%, signal=46%
KEGG_GLYCOSYLPHOSPHATIDYLINOSITOL_GPI_ANCHOR_BIOSYNTHESIS	KEGG_GLYCOSYLPHOSPHATIDYLINOSITOL_GPI_ANCHOR_BIOSYNTHESIS		24	0.477366	1.31888	0.115951	0.212803	1	6297	tags=63%, list=27%, signal=85%
GRAHAM_CML_QUIESCENT_VS_CML_DIVIDING_UP	GRAHAM_CML_QUIESCENT_VS_CML_DIVIDING_UP		22	0.48441	1.31876	0.116566	0.212704	1	3578	tags=27%, list=15%, signal=32%
KRIEG_KDM3A_TARGETS_NOT_HYPOXIA	KRIEG_KDM3A_TARGETS_NOT_HYPOXIA		177	0.333061	1.31865	0.0224693	0.212587	1	5161	tags=40%, list=22%, signal=51%
ACEVEDO_LIVER_CANCER_WITH_H3K27ME3_DN	ACEVEDO_LIVER_CANCER_WITH_H3K27ME3_DN		150	0.339559	1.31801	0.027583	0.213172	1	3219	tags=28%, list=14%, signal=32%
GENTILE_UV_RESPONSE_CLUSTER_D8	GENTILE_UV_RESPONSE_CLUSTER_D8		38	0.427021	1.31762	0.0872144	0.213426	1	4030	tags=39%, list=17%, signal=48%
BIOCARTA_PGC1A_PATHWAY	BIOCARTA_PGC1A_PATHWAY		22	0.482726	1.31626	0.119811	0.215012	1	2742	tags=36%, list=12%, signal=41%
WANG_SMARCE1_TARGETS_DN	WANG_SMARCE1_TARGETS_DN		330	0.310553	1.31591	0.00897532	0.215235	1	5411	tags=37%, list=23%, signal=47%
LEIN_MEDULLA_MARKERS	LEIN_MEDULLA_MARKERS		76	0.374149	1.31413	0.0563986	0.21743	1	2325	tags=26%, list=10%, signal=29%
MITSIADES_RESPONSE_TO_APLIDIN_DN	MITSIADES_RESPONSE_TO_APLIDIN_DN		233	0.321274	1.31359	0.0152672	0.217919	1	5079	tags=35%, list=22%, signal=44%
WANG_RECURRENT_LIVER_CANCER_UP	WANG_RECURRENT_LIVER_CANCER_UP		19	0.502866	1.31223	0.130602	0.219517	1	2135	tags=26%, list=9%, signal=29%
DEURIG_T_CELL_PROLYMPHOCYTIC_LEUKEMIA_UP	DEURIG_T_CELL_PROLYMPHOCYTIC_LEUKEMIA_UP		326	0.30936	1.31001	0.00813421	0.222317	1	3949	tags=27%, list=17%, signal=32%
BHATI_G2M_ARREST_BY_2METHOXYESTRADIOL_UP	BHATI_G2M_ARREST_BY_2METHOXYESTRADIOL_UP		109	0.352601	1.30965	0.0415815	0.222552	1	6299	tags=50%, list=27%, signal=67%
WALLACE_PROSTATE_CANCER_UP	WALLACE_PROSTATE_CANCER_UP		19	0.501067	1.30936	0.13094	0.222693	1	4542	tags=53%, list=19%, signal=65%
PID_THROMBIN_PAR4_PATHWAY	PID_THROMBIN_PAR4_PATHWAY		15	0.530999	1.30915	0.14237	0.222714	1	2448	tags=33%, list=10%, signal=37%
HERNANDEZ_MITOTIC_ARREST_BY_DOCETAXEL_1_UP	HERNANDEZ_MITOTIC_ARREST_BY_DOCETAXEL_1_UP		31	0.445759	1.30879	0.111812	0.222951	1	1793	tags=26%, list=8%, signal=28%
BYSTRYKH_HEMATOPOIESIS_STEM_CELL_AND_BRAIN_QTL_TRANS	BYSTRYKH_HEMATOPOIESIS_STEM_CELL_AND_BRAIN_QTL_TRANS		170	0.333134	1.30867	0.0267167	0.222848	1	3851	tags=26%, list=16%, signal=31%
RICKMAN_METASTASIS_UP	RICKMAN_METASTASIS_UP		289	0.313367	1.30684	0.0119048	0.22513	1	5158	tags=35%, list=22%, signal=44%
BIOCARTA_VEGF_PATHWAY	BIOCARTA_VEGF_PATHWAY		27	0.457034	1.30667	0.118833	0.225099	1	3476	tags=37%, list=15%, signal=43%
LOPEZ_TRANSLATION_VIA_FN1_SIGNALING	LOPEZ_TRANSLATION_VIA_FN1_SIGNALING		35	0.4342	1.3065	0.102693	0.225065	1	2306	tags=23%, list=10%, signal=25%
WENG_POR_DOSAGE	WENG_POR_DOSAGE		17	0.512571	1.30611	0.140935	0.225346	1	5324	tags=53%, list=23%, signal=68%
GAJATE_RESPONSE_TO_TRABECTEDIN_UP	GAJATE_RESPONSE_TO_TRABECTEDIN_UP		58	0.391543	1.30578	0.0746236	0.225547	1	3967	tags=31%, list=17%, signal=37%
MORI_EMU_MYC_LYMPHOMA_BY_ONSET_TIME_UP	MORI_EMU_MYC_LYMPHOMA_BY_ONSET_TIME_UP		99	0.356634	1.30576	0.0471762	0.225317	1	4503	tags=40%, list=19%, signal=50%
SARTIPY_NORMAL_AT_INSULIN_RESISTANCE_UP	SARTIPY_NORMAL_AT_INSULIN_RESISTANCE_UP		33	0.43974	1.30554	0.110056	0.225359	1	2763	tags=27%, list=12%, signal=31%
REACTOME_HEMOSTASIS	REACTOME_HEMOSTASIS		424	0.301247	1.30447	0.00447251	0.226563	1	3497	tags=26%, list=15%, signal=30%
REACTOME_FORMATION_OF_TRANSCRIPTION_COUPLED_NER_TC_NER_REPAIR_COMPLEX	REACTOME_FORMATION_OF_TRANSCRIPTION_COUPLED_NER_TC_NER_REPAIR_COMPLEX		28	0.453506	1.30399	0.113286	0.226966	1	3175	tags=36%, list=14%, signal=41%
CHIARADONNA_NEOPLASTIC_TRANSFORMATION_KRAS_CDC25_UP	CHIARADONNA_NEOPLASTIC_TRANSFORMATION_KRAS_CDC25_UP		49	0.40408	1.30385	0.0907094	0.226899	1	2563	tags=31%, list=11%, signal=34%
MULLIGHAN_MLL_SIGNATURE_2_UP	MULLIGHAN_MLL_SIGNATURE_2_UP		372	0.304406	1.30382	0.00646663	0.22669	1	4441	tags=30%, list=19%, signal=37%
WANG_BARRETTS_ESOPHAGUS_UP	WANG_BARRETTS_ESOPHAGUS_UP		44	0.410939	1.3038	0.0974225	0.226439	1	4553	tags=39%, list=19%, signal=48%
PID_ARF_3PATHWAY	PID_ARF_3PATHWAY		19	0.496717	1.3034	0.132649	0.226768	1	1886	tags=26%, list=8%, signal=29%
MOOTHA_GLUCONEOGENESIS	MOOTHA_GLUCONEOGENESIS		28	0.452474	1.3034	0.118902	0.226506	1	2921	tags=36%, list=12%, signal=41%
PENG_LEUCINE_DEPRIVATION_UP	PENG_LEUCINE_DEPRIVATION_UP		129	0.343122	1.30265	0.0413321	0.227301	1	3886	tags=30%, list=17%, signal=36%
SERVITJA_ISLET_HNF1A_TARGETS_DN	SERVITJA_ISLET_HNF1A_TARGETS_DN		101	0.353935	1.30225	0.0505872	0.227602	1	2542	tags=19%, list=11%, signal=21%
EPPERT_PROGENITOR	EPPERT_PROGENITOR		127	0.342273	1.30219	0.0398033	0.227424	1	3996	tags=32%, list=17%, signal=39%
XU_RESPONSE_TO_TRETINOIN_AND_NSC682994_DN	XU_RESPONSE_TO_TRETINOIN_AND_NSC682994_DN		15	0.525764	1.30144	0.149201	0.228203	1	4368	tags=53%, list=19%, signal=66%
TONKS_TARGETS_OF_RUNX1_RUNX1T1_FUSION_MONOCYTE_UP	TONKS_TARGETS_OF_RUNX1_RUNX1T1_FUSION_MONOCYTE_UP		190	0.325211	1.30025	0.0258807	0.229633	1	4695	tags=34%, list=20%, signal=42%
REACTOME_PTM_GAMMA_CARBOXYLATION_HYPUSINE_FORMATION_AND_ARYLSULFATASE_ACTIVATION	REACTOME_PTM_GAMMA_CARBOXYLATION_HYPUSINE_FORMATION_AND_ARYLSULFATASE_ACTIVATION		22	0.480259	1.30023	0.133376	0.229398	1	4903	tags=36%, list=21%, signal=46%
REACTOME_PHOSPHORYLATION_OF_THE_APC_C	REACTOME_PHOSPHORYLATION_OF_THE_APC_C		17	0.510947	1.30008	0.136519	0.229345	1	5711	tags=53%, list=24%, signal=70%
ZHANG_TLX_TARGETS_DN	ZHANG_TLX_TARGETS_DN		86	0.363078	1.29959	0.0605007	0.229792	1	6290	tags=40%, list=27%, signal=54%
WANG_BARRETTS_ESOPHAGUS_AND_ESOPHAGUS_CANCER_DN	WANG_BARRETTS_ESOPHAGUS_AND_ESOPHAGUS_CANCER_DN		35	0.431049	1.29956	0.107159	0.229559	1	2550	tags=23%, list=11%, signal=26%
DELPUECH_FOXO3_TARGETS_UP	DELPUECH_FOXO3_TARGETS_UP		63	0.382129	1.2991	0.077182	0.229952	1	3573	tags=27%, list=15%, signal=32%
IVANOVA_HEMATOPOIESIS_INTERMEDIATE_PROGENITOR	IVANOVA_HEMATOPOIESIS_INTERMEDIATE_PROGENITOR		134	0.339933	1.29861	0.0414928	0.230386	1	5142	tags=40%, list=22%, signal=51%
MCCABE_HOXC6_TARGETS_DN	MCCABE_HOXC6_TARGETS_DN		19	0.496454	1.29855	0.135439	0.230205	1	3685	tags=42%, list=16%, signal=50%
NUTT_GBM_VS_AO_GLIOMA_DN	NUTT_GBM_VS_AO_GLIOMA_DN		43	0.4137	1.29834	0.0996286	0.23025	1	4837	tags=53%, list=21%, signal=67%
SMITH_TERT_TARGETS_UP	SMITH_TERT_TARGETS_UP		137	0.338649	1.29808	0.0407596	0.230362	1	4618	tags=34%, list=20%, signal=42%
RUTELLA_RESPONSE_TO_HGF_VS_CSF2RB_AND_IL4_UP	RUTELLA_RESPONSE_TO_HGF_VS_CSF2RB_AND_IL4_UP		359	0.303363	1.29799	0.0066838	0.230228	1	2661	tags=22%, list=11%, signal=24%
CHUANG_OXIDATIVE_STRESS_RESPONSE_UP	CHUANG_OXIDATIVE_STRESS_RESPONSE_UP		26	0.458108	1.29749	0.125515	0.230673	1	2298	tags=27%, list=10%, signal=30%
MOLENAAR_TARGETS_OF_CCND1_AND_CDK4_DN	MOLENAAR_TARGETS_OF_CCND1_AND_CDK4_DN		48	0.401425	1.29713	0.0863102	0.23093	1	4423	tags=31%, list=19%, signal=38%
COLINA_TARGETS_OF_4EBP1_AND_4EBP2	COLINA_TARGETS_OF_4EBP1_AND_4EBP2		340	0.304967	1.29634	0.010068	0.231794	1	5178	tags=37%, list=22%, signal=47%
KEGG_PURINE_METABOLISM	KEGG_PURINE_METABOLISM		153	0.332655	1.29607	0.0328295	0.231937	1	3175	tags=30%, list=14%, signal=35%
DORSEY_GAB2_TARGETS	DORSEY_GAB2_TARGETS		29	0.44772	1.29572	0.112782	0.232157	1	176	tags=14%, list=1%, signal=14%
PARK_HSC_VS_MULTIPOTENT_PROGENITORS_DN	PARK_HSC_VS_MULTIPOTENT_PROGENITORS_DN		18	0.501523	1.29503	0.143583	0.232888	1	4695	tags=50%, list=20%, signal=62%
HOSHIDA_LIVER_CANCER_SUBCLASS_S1	HOSHIDA_LIVER_CANCER_SUBCLASS_S1		221	0.318782	1.29467	0.0201852	0.233131	1	5191	tags=40%, list=22%, signal=51%
REACTOME_MAPK_TARGETS_NUCLEAR_EVENTS_MEDIATED_BY_MAP_KINASES	REACTOME_MAPK_TARGETS_NUCLEAR_EVENTS_MEDIATED_BY_MAP_KINASES		30	0.44168	1.29417	0.11784	0.233573	1	948	tags=17%, list=4%, signal=17%
BAELDE_DIABETIC_NEPHROPATHY_DN	BAELDE_DIABETIC_NEPHROPATHY_DN		409	0.29977	1.29387	0.00720576	0.233721	1	3219	tags=23%, list=14%, signal=27%
BIOCARTA_CK1_PATHWAY	BIOCARTA_CK1_PATHWAY		15	0.526808	1.29374	0.149349	0.233644	1	3735	tags=60%, list=16%, signal=71%
LU_TUMOR_VASCULATURE_UP	LU_TUMOR_VASCULATURE_UP		27	0.453405	1.29361	0.127124	0.233553	1	4828	tags=52%, list=21%, signal=65%
JI_RESPONSE_TO_FSH_DN	JI_RESPONSE_TO_FSH_DN		56	0.390229	1.29317	0.0854757	0.233922	1	4328	tags=32%, list=18%, signal=39%
HALMOS_CEBPA_TARGETS_UP	HALMOS_CEBPA_TARGETS_UP		47	0.402187	1.29223	0.0990317	0.235003	1	2861	tags=21%, list=12%, signal=24%
KEGG_BLADDER_CANCER	KEGG_BLADDER_CANCER		39	0.417101	1.29182	0.100629	0.235336	1	910	tags=15%, list=4%, signal=16%
JACKSON_DNMT1_TARGETS_DN	JACKSON_DNMT1_TARGETS_DN		24	0.463694	1.29176	0.131036	0.23516	1	3093	tags=33%, list=13%, signal=38%
BIOCARTA_MAL_PATHWAY	BIOCARTA_MAL_PATHWAY		17	0.510044	1.29174	0.142307	0.234919	1	2482	tags=29%, list=11%, signal=33%
GRYDER_PAX3FOXO1_TOP_ENHANCERS	GRYDER_PAX3FOXO1_TOP_ENHANCERS		415	0.29915	1.29143	0.0045057	0.235107	1	4561	tags=32%, list=19%, signal=39%
REACTOME_G1_PHASE	REACTOME_G1_PHASE		33	0.434026	1.2911	0.114991	0.23533	1	2338	tags=21%, list=10%, signal=24%
POMEROY_MEDULLOBLASTOMA_DESMOPLASIC_VS_CLASSIC_DN	POMEROY_MEDULLOBLASTOMA_DESMOPLASIC_VS_CLASSIC_DN		59	0.385608	1.291	0.0913931	0.2352	1	3579	tags=36%, list=15%, signal=42%
PEART_HDAC_PROLIFERATION_CLUSTER_DN	PEART_HDAC_PROLIFERATION_CLUSTER_DN		71	0.372845	1.29097	0.0715879	0.234977	1	3712	tags=31%, list=16%, signal=37%
DIRMEIER_LMP1_RESPONSE_LATE_DN	DIRMEIER_LMP1_RESPONSE_LATE_DN		29	0.446692	1.29043	0.122848	0.235513	1	3747	tags=45%, list=16%, signal=53%
KEGG_NUCLEOTIDE_EXCISION_REPAIR	KEGG_NUCLEOTIDE_EXCISION_REPAIR		43	0.407857	1.29036	0.103328	0.235365	1	3985	tags=35%, list=17%, signal=42%
JOHANSSON_BRAIN_CANCER_EARLY_VS_LATE_DN	JOHANSSON_BRAIN_CANCER_EARLY_VS_LATE_DN		45	0.403511	1.29021	0.0988626	0.235309	1	5013	tags=44%, list=21%, signal=56%
BIOCARTA_BIOPEPTIDES_PATHWAY	BIOCARTA_BIOPEPTIDES_PATHWAY		41	0.413008	1.2898	0.0971834	0.235622	1	2742	tags=24%, list=12%, signal=28%
BIOCARTA_GPCR_PATHWAY	BIOCARTA_GPCR_PATHWAY		32	0.432688	1.28952	0.112184	0.235771	1	2592	tags=34%, list=11%, signal=39%
HOFMANN_MYELODYSPLASTIC_SYNDROM_RISK_UP	HOFMANN_MYELODYSPLASTIC_SYNDROM_RISK_UP		23	0.471248	1.28825	0.140419	0.237348	1	1312	tags=17%, list=6%, signal=18%
WESTON_VEGFA_TARGETS_12HR	WESTON_VEGFA_TARGETS_12HR		35	0.427305	1.28778	0.118742	0.237775	1	769	tags=17%, list=3%, signal=18%
LIEN_BREAST_CARCINOMA_METAPLASTIC	LIEN_BREAST_CARCINOMA_METAPLASTIC		34	0.428308	1.28723	0.115145	0.238315	1	2562	tags=26%, list=11%, signal=30%
REACTOME_INSULIN_RECEPTOR_SIGNALLING_CASCADE	REACTOME_INSULIN_RECEPTOR_SIGNALLING_CASCADE		81	0.362272	1.28602	0.0737194	0.239803	1	4956	tags=35%, list=21%, signal=44%
BRUINS_UVC_RESPONSE_VIA_TP53_GROUP_C	BRUINS_UVC_RESPONSE_VIA_TP53_GROUP_C		85	0.361134	1.28484	0.07344	0.241295	1	3088	tags=24%, list=13%, signal=27%
LIAN_LIPA_TARGETS_3M	LIAN_LIPA_TARGETS_3M		55	0.38907	1.28444	0.0953867	0.241625	1	1439	tags=25%, list=6%, signal=27%
WESTON_VEGFA_TARGETS_6HR	WESTON_VEGFA_TARGETS_6HR		59	0.383404	1.28439	0.0868896	0.241422	1	1683	tags=20%, list=7%, signal=22%
PEDERSEN_METASTASIS_BY_ERBB2_ISOFORM_1	PEDERSEN_METASTASIS_BY_ERBB2_ISOFORM_1		45	0.404227	1.28414	0.103524	0.241516	1	1919	tags=16%, list=8%, signal=17%
LANDIS_ERBB2_BREAST_TUMORS_324_UP	LANDIS_ERBB2_BREAST_TUMORS_324_UP		138	0.334235	1.28388	0.0444239	0.24166	1	4338	tags=38%, list=19%, signal=47%
LEE_AGING_CEREBELLUM_UP	LEE_AGING_CEREBELLUM_UP		76	0.366131	1.28327	0.0773303	0.242293	1	4261	tags=38%, list=18%, signal=46%
TERAMOTO_OPN_TARGETS_CLUSTER_7	TERAMOTO_OPN_TARGETS_CLUSTER_7		17	0.50706	1.28296	0.149355	0.242487	1	3402	tags=35%, list=15%, signal=41%
MARTINEZ_RESPONSE_TO_TRABECTEDIN_UP	MARTINEZ_RESPONSE_TO_TRABECTEDIN_UP		64	0.375516	1.28136	0.0871725	0.244622	1	3199	tags=33%, list=14%, signal=38%
KEGG_TRYPTOPHAN_METABOLISM	KEGG_TRYPTOPHAN_METABOLISM		40	0.412559	1.2809	0.112935	0.245046	1	5345	tags=35%, list=23%, signal=45%
HOLLEMAN_ASPARAGINASE_RESISTANCE_ALL_DN	HOLLEMAN_ASPARAGINASE_RESISTANCE_ALL_DN		22	0.473265	1.28045	0.145861	0.24545	1	5742	tags=55%, list=25%, signal=72%
REACTOME_MEMBRANE_TRAFFICKING	REACTOME_MEMBRANE_TRAFFICKING		117	0.341351	1.28042	0.0536835	0.245228	1	4778	tags=33%, list=20%, signal=42%
CREIGHTON_AKT1_SIGNALING_VIA_MTOR_UP	CREIGHTON_AKT1_SIGNALING_VIA_MTOR_UP		34	0.426026	1.27977	0.125108	0.245935	1	4541	tags=41%, list=19%, signal=51%
WAMUNYOKOLI_OVARIAN_CANCER_GRADES_1_2_UP	WAMUNYOKOLI_OVARIAN_CANCER_GRADES_1_2_UP		125	0.337048	1.27926	0.0482039	0.246441	1	3376	tags=25%, list=14%, signal=29%
DALESSIO_TSA_RESPONSE	DALESSIO_TSA_RESPONSE		20	0.481309	1.27886	0.145639	0.24675	1	1242	tags=15%, list=5%, signal=16%
PIONTEK_PKD1_TARGETS_UP	PIONTEK_PKD1_TARGETS_UP		32	0.432242	1.27862	0.125865	0.246848	1	4013	tags=38%, list=17%, signal=45%
BECKER_TAMOXIFEN_RESISTANCE_DN	BECKER_TAMOXIFEN_RESISTANCE_DN		48	0.395916	1.27849	0.0981582	0.24676	1	3097	tags=21%, list=13%, signal=24%
ABRAHAM_ALPC_VS_MULTIPLE_MYELOMA_UP	ABRAHAM_ALPC_VS_MULTIPLE_MYELOMA_UP		25	0.458948	1.27836	0.133801	0.246682	1	948	tags=16%, list=4%, signal=17%
KUROKAWA_LIVER_CANCER_CHEMOTHERAPY_DN	KUROKAWA_LIVER_CANCER_CHEMOTHERAPY_DN		40	0.411532	1.27815	0.109032	0.246728	1	3170	tags=33%, list=14%, signal=38%
MARZEC_IL2_SIGNALING_UP	MARZEC_IL2_SIGNALING_UP		110	0.344108	1.27729	0.056483	0.247741	1	4128	tags=34%, list=18%, signal=41%
FERRANDO_TAL1_NEIGHBORS	FERRANDO_TAL1_NEIGHBORS		18	0.494553	1.27671	0.158957	0.248375	1	1419	tags=33%, list=6%, signal=35%
BIOCARTA_P53_PATHWAY	BIOCARTA_P53_PATHWAY		15	0.517422	1.27617	0.173734	0.248921	1	1772	tags=20%, list=8%, signal=22%
PENG_GLUCOSE_DEPRIVATION_UP	PENG_GLUCOSE_DEPRIVATION_UP		42	0.406465	1.27595	0.112174	0.248998	1	5728	tags=50%, list=24%, signal=66%
REACTOME_ENERGY_DEPENDENT_REGULATION_OF_MTOR_BY_LKB1_AMPK	REACTOME_ENERGY_DEPENDENT_REGULATION_OF_MTOR_BY_LKB1_AMPK		17	0.502083	1.27522	0.15619	0.249832	1	4824	tags=53%, list=21%, signal=67%
WILCOX_RESPONSE_TO_PROGESTERONE_UP	WILCOX_RESPONSE_TO_PROGESTERONE_UP		127	0.337102	1.27508	0.0599635	0.249758	1	4961	tags=36%, list=21%, signal=46%
CHIN_BREAST_CANCER_COPY_NUMBER_UP	CHIN_BREAST_CANCER_COPY_NUMBER_UP		24	0.463162	1.27472	0.151986	0.250034	1	143	tags=13%, list=1%, signal=13%
BIOCARTA_CASPASE_PATHWAY	BIOCARTA_CASPASE_PATHWAY		22	0.468914	1.27413	0.151534	0.25065	1	4750	tags=50%, list=20%, signal=63%
PID_INTEGRIN1_PATHWAY	PID_INTEGRIN1_PATHWAY		66	0.372507	1.27396	0.0858963	0.250629	1	3849	tags=29%, list=16%, signal=34%
PID_INTEGRIN_A9B1_PATHWAY	PID_INTEGRIN_A9B1_PATHWAY		25	0.457391	1.27383	0.141522	0.250558	1	1490	tags=20%, list=6%, signal=21%
BOCHKIS_FOXA2_TARGETS	BOCHKIS_FOXA2_TARGETS		384	0.29586	1.27379	0.00942435	0.250347	1	4161	tags=27%, list=18%, signal=33%
PAPASPYRIDONOS_UNSTABLE_ATEROSCLEROTIC_PLAQUE_UP	PAPASPYRIDONOS_UNSTABLE_ATEROSCLEROTIC_PLAQUE_UP		47	0.398016	1.27332	0.113042	0.250791	1	4667	tags=47%, list=20%, signal=58%
BIOCARTA_SPRY_PATHWAY	BIOCARTA_SPRY_PATHWAY		17	0.501019	1.2733	0.16025	0.250566	1	1547	tags=24%, list=7%, signal=25%
PID_NCADHERIN_PATHWAY	PID_NCADHERIN_PATHWAY		32	0.430123	1.27306	0.126165	0.250654	1	3476	tags=34%, list=15%, signal=40%
KEGG_REGULATION_OF_AUTOPHAGY	KEGG_REGULATION_OF_AUTOPHAGY		28	0.444798	1.2724	0.13878	0.251409	1	5152	tags=36%, list=22%, signal=46%
NIKOLSKY_BREAST_CANCER_8Q12_Q22_AMPLICON	NIKOLSKY_BREAST_CANCER_8Q12_Q22_AMPLICON		116	0.341098	1.27184	0.0620915	0.251999	1	3595	tags=29%, list=15%, signal=34%
WHITEHURST_PACLITAXEL_SENSITIVITY	WHITEHURST_PACLITAXEL_SENSITIVITY		33	0.423884	1.27181	0.130022	0.251778	1	3675	tags=36%, list=16%, signal=43%
REACTOME_THROMBOXANE_SIGNALLING_THROUGH_TP_RECEPTOR	REACTOME_THROMBOXANE_SIGNALLING_THROUGH_TP_RECEPTOR		23	0.465498	1.27082	0.143323	0.253015	1	3419	tags=39%, list=15%, signal=46%
BHATTACHARYA_EMBRYONIC_STEM_CELL	BHATTACHARYA_EMBRYONIC_STEM_CELL		83	0.357122	1.26983	0.0742629	0.254255	1	5580	tags=47%, list=24%, signal=61%
BOYAULT_LIVER_CANCER_SUBCLASS_G23_UP	BOYAULT_LIVER_CANCER_SUBCLASS_G23_UP		48	0.393815	1.26917	0.107143	0.254985	1	4961	tags=46%, list=21%, signal=58%
BIOCARTA_GCR_PATHWAY	BIOCARTA_GCR_PATHWAY		19	0.48824	1.26852	0.164176	0.255732	1	5013	tags=47%, list=21%, signal=60%
SUNG_METASTASIS_STROMA_DN	SUNG_METASTASIS_STROMA_DN		46	0.39905	1.26835	0.108337	0.255712	1	4517	tags=39%, list=19%, signal=48%
BIOCARTA_CXCR4_PATHWAY	BIOCARTA_CXCR4_PATHWAY		23	0.465093	1.26745	0.143761	0.256834	1	4238	tags=35%, list=18%, signal=42%
KANG_AR_TARGETS_DN	KANG_AR_TARGETS_DN		19	0.485343	1.26638	0.155659	0.258209	1	1108	tags=16%, list=5%, signal=17%
HUMMEL_BURKITTS_LYMPHOMA_UP	HUMMEL_BURKITTS_LYMPHOMA_UP		36	0.415179	1.26637	0.127558	0.257958	1	5147	tags=44%, list=22%, signal=57%
PID_ECADHERIN_NASCENT_AJ_PATHWAY	PID_ECADHERIN_NASCENT_AJ_PATHWAY		39	0.409159	1.26612	0.127122	0.25806	1	2499	tags=26%, list=11%, signal=29%
PID_FOXO_PATHWAY	PID_FOXO_PATHWAY		48	0.392821	1.26375	0.114721	0.261509	1	4562	tags=44%, list=19%, signal=54%
KEGG_TYROSINE_METABOLISM	KEGG_TYROSINE_METABOLISM		37	0.414617	1.26337	0.130509	0.261832	1	3640	tags=24%, list=16%, signal=29%
WANG_ESOPHAGUS_CANCER_VS_NORMAL_UP	WANG_ESOPHAGUS_CANCER_VS_NORMAL_UP		111	0.338482	1.26328	0.06055	0.261703	1	3297	tags=29%, list=14%, signal=33%
WANG_RESPONSE_TO_ANDROGEN_UP	WANG_RESPONSE_TO_ANDROGEN_UP		26	0.448699	1.26307	0.147384	0.261747	1	6204	tags=58%, list=26%, signal=78%
KEGG_MISMATCH_REPAIR	KEGG_MISMATCH_REPAIR		22	0.466916	1.26286	0.15326	0.261803	1	7427	tags=59%, list=32%, signal=86%
SMIRNOV_RESPONSE_TO_IR_6HR_UP	SMIRNOV_RESPONSE_TO_IR_6HR_UP		135	0.329612	1.26266	0.0537584	0.261839	1	4469	tags=35%, list=19%, signal=43%
KEGG_GLYCEROLIPID_METABOLISM	KEGG_GLYCEROLIPID_METABOLISM		47	0.393458	1.26219	0.115138	0.262285	1	3382	tags=36%, list=14%, signal=42%
JISON_SICKLE_CELL_DISEASE_UP	JISON_SICKLE_CELL_DISEASE_UP		163	0.321848	1.26203	0.0485227	0.262265	1	3687	tags=37%, list=16%, signal=43%
BERNARD_PPAPDC1B_TARGETS_UP	BERNARD_PPAPDC1B_TARGETS_UP		36	0.416229	1.26203	0.133274	0.261998	1	3032	tags=28%, list=13%, signal=32%
CREIGHTON_ENDOCRINE_THERAPY_RESISTANCE_5	CREIGHTON_ENDOCRINE_THERAPY_RESISTANCE_5		413	0.291972	1.26199	0.0114434	0.261789	1	4426	tags=31%, list=19%, signal=37%
PID_HIF1_TFPATHWAY	PID_HIF1_TFPATHWAY		62	0.373595	1.26159	0.0985978	0.262143	1	3153	tags=26%, list=13%, signal=30%
PID_PI3K_PLC_TRK_PATHWAY	PID_PI3K_PLC_TRK_PATHWAY		34	0.419867	1.26158	0.133932	0.261888	1	4668	tags=35%, list=20%, signal=44%
KOBAYASHI_EGFR_SIGNALING_6HR_DN	KOBAYASHI_EGFR_SIGNALING_6HR_DN		18	0.487446	1.26143	0.169067	0.261865	1	948	tags=28%, list=4%, signal=29%
BIOCARTA_RHO_PATHWAY	BIOCARTA_RHO_PATHWAY		31	0.428853	1.26084	0.136177	0.262517	1	5640	tags=45%, list=24%, signal=59%
YAMASHITA_METHYLATED_IN_PROSTATE_CANCER	YAMASHITA_METHYLATED_IN_PROSTATE_CANCER		53	0.384448	1.26016	0.115587	0.263322	1	3261	tags=23%, list=14%, signal=26%
BIOCARTA_TCR_PATHWAY	BIOCARTA_TCR_PATHWAY		43	0.400591	1.25995	0.125811	0.263376	1	1953	tags=23%, list=8%, signal=25%
PID_INTEGRIN3_PATHWAY	PID_INTEGRIN3_PATHWAY		43	0.403163	1.25984	0.121324	0.263269	1	2099	tags=23%, list=9%, signal=25%
BROWNE_HCMV_INFECTION_2HR_DN	BROWNE_HCMV_INFECTION_2HR_DN		48	0.392171	1.2596	0.116986	0.26338	1	1937	tags=25%, list=8%, signal=27%
MARSHALL_VIRAL_INFECTION_RESPONSE_DN	MARSHALL_VIRAL_INFECTION_RESPONSE_DN		29	0.434981	1.25802	0.143162	0.265609	1	3519	tags=38%, list=15%, signal=45%
XU_CREBBP_TARGETS_DN	XU_CREBBP_TARGETS_DN		39	0.407106	1.25778	0.129476	0.265715	1	2311	tags=26%, list=10%, signal=28%
MCBRYAN_PUBERTAL_BREAST_3_4WK_DN	MCBRYAN_PUBERTAL_BREAST_3_4WK_DN		33	0.419341	1.25769	0.133648	0.265574	1	3365	tags=30%, list=14%, signal=35%
AUNG_GASTRIC_CANCER	AUNG_GASTRIC_CANCER		50	0.386717	1.25748	0.112956	0.26564	1	1937	tags=20%, list=8%, signal=22%
HUTTMANN_B_CLL_POOR_SURVIVAL_DN	HUTTMANN_B_CLL_POOR_SURVIVAL_DN		53	0.382918	1.25726	0.113963	0.265709	1	771	tags=17%, list=3%, signal=18%
REACTOME_METABOLISM_OF_CARBOHYDRATES	REACTOME_METABOLISM_OF_CARBOHYDRATES		222	0.308833	1.25679	0.0368285	0.266184	1	5158	tags=38%, list=22%, signal=49%
REACTOME_MUSCLE_CONTRACTION	REACTOME_MUSCLE_CONTRACTION		46	0.394698	1.25678	0.121613	0.265913	1	2685	tags=26%, list=11%, signal=29%
ZHANG_BREAST_CANCER_PROGENITORS_DN	ZHANG_BREAST_CANCER_PROGENITORS_DN		132	0.329546	1.25674	0.0572139	0.26571	1	5043	tags=39%, list=22%, signal=49%
LEE_LIVER_CANCER_MYC_TGFA_UP	LEE_LIVER_CANCER_MYC_TGFA_UP		59	0.374665	1.25673	0.11148	0.265447	1	2978	tags=24%, list=13%, signal=27%
IVANOVA_HEMATOPOIESIS_STEM_CELL	IVANOVA_HEMATOPOIESIS_STEM_CELL		236	0.306856	1.25622	0.0332771	0.265972	1	3519	tags=25%, list=15%, signal=29%
LEE_LIVER_CANCER_MYC_UP	LEE_LIVER_CANCER_MYC_UP		53	0.381404	1.25585	0.111111	0.26628	1	4078	tags=38%, list=17%, signal=46%
BIOCARTA_IL7_PATHWAY	BIOCARTA_IL7_PATHWAY		17	0.492366	1.25541	0.177914	0.266696	1	4238	tags=47%, list=18%, signal=57%
PID_HEDGEHOG_GLI_PATHWAY	PID_HEDGEHOG_GLI_PATHWAY		48	0.390309	1.2552	0.122826	0.266762	1	3921	tags=38%, list=17%, signal=45%
HEDENFALK_BREAST_CANCER_HEREDITARY_VS_SPORADIC	HEDENFALK_BREAST_CANCER_HEREDITARY_VS_SPORADIC		47	0.391022	1.25481	0.120294	0.267103	1	5248	tags=47%, list=22%, signal=60%
LINDGREN_BLADDER_CANCER_CLUSTER_3_DN	LINDGREN_BLADDER_CANCER_CLUSTER_3_DN		202	0.311318	1.25459	0.0396088	0.267167	1	3209	tags=26%, list=14%, signal=30%
HINATA_NFKB_TARGETS_KERATINOCYTE_DN	HINATA_NFKB_TARGETS_KERATINOCYTE_DN		20	0.471716	1.25417	0.164565	0.267566	1	2359	tags=25%, list=10%, signal=28%
REACTOME_ACTIVATION_OF_GENES_BY_ATF4	REACTOME_ACTIVATION_OF_GENES_BY_ATF4		24	0.453326	1.25402	0.159483	0.267542	1	2255	tags=21%, list=10%, signal=23%
HELLEBREKERS_SILENCED_DURING_TUMOR_ANGIOGENESIS	HELLEBREKERS_SILENCED_DURING_TUMOR_ANGIOGENESIS		74	0.359135	1.25389	0.0951297	0.267476	1	1495	tags=18%, list=6%, signal=19%
SHEPARD_CRUSH_AND_BURN_MUTANT_UP	SHEPARD_CRUSH_AND_BURN_MUTANT_UP		177	0.317735	1.2535	0.0491418	0.267833	1	5101	tags=37%, list=22%, signal=47%
VERNELL_RETINOBLASTOMA_PATHWAY_DN	VERNELL_RETINOBLASTOMA_PATHWAY_DN		18	0.484015	1.25215	0.173483	0.269723	1	858	tags=17%, list=4%, signal=17%
IWANAGA_CARCINOGENESIS_BY_KRAS_PTEN_UP	IWANAGA_CARCINOGENESIS_BY_KRAS_PTEN_UP		159	0.321325	1.25212	0.0519636	0.269499	1	3442	tags=25%, list=15%, signal=29%
KEGG_PRION_DISEASES	KEGG_PRION_DISEASES		33	0.419416	1.25176	0.152117	0.269791	1	4161	tags=39%, list=18%, signal=48%
TERAO_AOX4_TARGETS_HG_UP	TERAO_AOX4_TARGETS_HG_UP		25	0.447263	1.25176	0.155621	0.269525	1	6239	tags=60%, list=27%, signal=82%
BARRIER_CANCER_RELAPSE_NORMAL_SAMPLE_UP	BARRIER_CANCER_RELAPSE_NORMAL_SAMPLE_UP		29	0.435174	1.25134	0.150208	0.269936	1	6426	tags=52%, list=27%, signal=71%
MARIADASON_RESPONSE_TO_BUTYRATE_SULINDAC_4	MARIADASON_RESPONSE_TO_BUTYRATE_SULINDAC_4		19	0.47483	1.25092	0.166062	0.270364	1	5400	tags=53%, list=23%, signal=68%
VANTVEER_BREAST_CANCER_ESR1_DN	VANTVEER_BREAST_CANCER_ESR1_DN		219	0.308241	1.25062	0.0377537	0.270569	1	4306	tags=32%, list=18%, signal=39%
SASSON_RESPONSE_TO_GONADOTROPHINS_DN	SASSON_RESPONSE_TO_GONADOTROPHINS_DN		83	0.350358	1.24862	0.0911765	0.273522	1	4491	tags=31%, list=19%, signal=39%
KUMAR_AUTOPHAGY_NETWORK	KUMAR_AUTOPHAGY_NETWORK		57	0.374376	1.24854	0.113611	0.273375	1	3951	tags=37%, list=17%, signal=44%
DANG_REGULATED_BY_MYC_DN	DANG_REGULATED_BY_MYC_DN		240	0.304899	1.24842	0.0362056	0.273294	1	3751	tags=23%, list=16%, signal=27%
KASLER_HDAC7_TARGETS_1_DN	KASLER_HDAC7_TARGETS_1_DN		17	0.494421	1.24821	0.175843	0.273352	1	15	tags=12%, list=0%, signal=12%
COLLIS_PRKDC_SUBSTRATES	COLLIS_PRKDC_SUBSTRATES		19	0.478272	1.24794	0.181684	0.273512	1	3175	tags=42%, list=14%, signal=49%
PID_VEGFR1_2_PATHWAY	PID_VEGFR1_2_PATHWAY		69	0.362124	1.24792	0.0994671	0.273259	1	5018	tags=39%, list=21%, signal=50%
BIOCARTA_NFAT_PATHWAY	BIOCARTA_NFAT_PATHWAY		50	0.385666	1.24728	0.126325	0.274024	1	4238	tags=30%, list=18%, signal=37%
KEEN_RESPONSE_TO_ROSIGLITAZONE_DN	KEEN_RESPONSE_TO_ROSIGLITAZONE_DN		99	0.341493	1.2472	0.0818995	0.273883	1	3830	tags=32%, list=16%, signal=38%
COLLIS_PRKDC_REGULATORS	COLLIS_PRKDC_REGULATORS		15	0.500989	1.24679	0.184362	0.274276	1	4876	tags=53%, list=21%, signal=67%
JIANG_TIP30_TARGETS_UP	JIANG_TIP30_TARGETS_UP		41	0.397707	1.24677	0.136404	0.274032	1	3849	tags=39%, list=16%, signal=47%
CONCANNON_APOPTOSIS_BY_EPOXOMICIN_UP	CONCANNON_APOPTOSIS_BY_EPOXOMICIN_UP		220	0.307096	1.24625	0.0404938	0.274577	1	2763	tags=21%, list=12%, signal=23%
RUTELLA_RESPONSE_TO_CSF2RB_AND_IL4_UP	RUTELLA_RESPONSE_TO_CSF2RB_AND_IL4_UP		305	0.296543	1.24619	0.0225931	0.274404	1	3061	tags=24%, list=13%, signal=27%
REACTOME_SIGNAL_AMPLIFICATION	REACTOME_SIGNAL_AMPLIFICATION		31	0.421821	1.24585	0.151946	0.274685	1	4294	tags=39%, list=18%, signal=47%
SYED_ESTRADIOL_RESPONSE	SYED_ESTRADIOL_RESPONSE		19	0.476185	1.24542	0.179063	0.275105	1	4092	tags=37%, list=17%, signal=45%
RADMACHER_AML_PROGNOSIS	RADMACHER_AML_PROGNOSIS		75	0.356995	1.24521	0.100045	0.275168	1	2751	tags=24%, list=12%, signal=27%
VECCHI_GASTRIC_CANCER_ADVANCED_VS_EARLY_DN	VECCHI_GASTRIC_CANCER_ADVANCED_VS_EARLY_DN		110	0.33298	1.24466	0.0798155	0.27578	1	2786	tags=20%, list=12%, signal=23%
REACTOME_NUCLEOTIDE_LIKE_PURINERGIC_RECEPTORS	REACTOME_NUCLEOTIDE_LIKE_PURINERGIC_RECEPTORS		15	0.504322	1.24442	0.186902	0.275896	1	841	tags=13%, list=4%, signal=14%
PEPPER_CHRONIC_LYMPHOCYTIC_LEUKEMIA_UP	PEPPER_CHRONIC_LYMPHOCYTIC_LEUKEMIA_UP		30	0.425282	1.24407	0.156958	0.276203	1	1800	tags=27%, list=8%, signal=29%
RIZKI_TUMOR_INVASIVENESS_3D_DN	RIZKI_TUMOR_INVASIVENESS_3D_DN		246	0.302687	1.2439	0.0375737	0.276193	1	4116	tags=30%, list=18%, signal=36%
NADLER_OBESITY_UP	NADLER_OBESITY_UP		55	0.376053	1.24388	0.11479	0.275946	1	2821	tags=29%, list=12%, signal=33%
REACTOME_BRANCHED_CHAIN_AMINO_ACID_CATABOLISM	REACTOME_BRANCHED_CHAIN_AMINO_ACID_CATABOLISM		17	0.488687	1.24385	0.183143	0.275731	1	3010	tags=41%, list=13%, signal=47%
KAN_RESPONSE_TO_ARSENIC_TRIOXIDE	KAN_RESPONSE_TO_ARSENIC_TRIOXIDE		105	0.336235	1.24313	0.0835623	0.276633	1	3888	tags=29%, list=17%, signal=34%
GRAHAM_CML_QUIESCENT_VS_NORMAL_QUIESCENT_DN	GRAHAM_CML_QUIESCENT_VS_NORMAL_QUIESCENT_DN		38	0.40355	1.24286	0.146775	0.276786	1	1723	tags=21%, list=7%, signal=23%
MATSUDA_NATURAL_KILLER_DIFFERENTIATION	MATSUDA_NATURAL_KILLER_DIFFERENTIATION		447	0.28547	1.24238	0.0108008	0.27729	1	3926	tags=31%, list=17%, signal=37%
REACTOME_POST_CHAPERONIN_TUBULIN_FOLDING_PATHWAY	REACTOME_POST_CHAPERONIN_TUBULIN_FOLDING_PATHWAY		16	0.497195	1.24232	0.191445	0.27712	1	3197	tags=50%, list=14%, signal=58%
RODWELL_AGING_KIDNEY_NO_BLOOD_UP	RODWELL_AGING_KIDNEY_NO_BLOOD_UP		198	0.309685	1.24147	0.0453988	0.27822	1	3789	tags=30%, list=16%, signal=36%
WANG_ESOPHAGUS_CANCER_VS_NORMAL_DN	WANG_ESOPHAGUS_CANCER_VS_NORMAL_DN		95	0.341694	1.24065	0.0925325	0.279289	1	3913	tags=28%, list=17%, signal=34%
GRABARCZYK_BCL11B_TARGETS_UP	GRABARCZYK_BCL11B_TARGETS_UP		67	0.362804	1.24036	0.114402	0.279494	1	1886	tags=24%, list=8%, signal=26%
MARTINEZ_RB1_TARGETS_DN	MARTINEZ_RB1_TARGETS_DN		497	0.282709	1.24008	0.00952381	0.279666	1	4167	tags=28%, list=18%, signal=34%
GAVIN_FOXP3_TARGETS_CLUSTER_P4	GAVIN_FOXP3_TARGETS_CLUSTER_P4		94	0.340617	1.24004	0.0938653	0.279458	1	3316	tags=32%, list=14%, signal=37%
FARDIN_HYPOXIA_11	FARDIN_HYPOXIA_11		31	0.421389	1.23989	0.151592	0.279438	1	1954	tags=29%, list=8%, signal=32%
PID_TELOMERASE_PATHWAY	PID_TELOMERASE_PATHWAY		67	0.36084	1.23917	0.115122	0.280351	1	4147	tags=27%, list=18%, signal=33%
DELLA_RESPONSE_TO_TSA_AND_BUTYRATE	DELLA_RESPONSE_TO_TSA_AND_BUTYRATE		21	0.460937	1.23838	0.174893	0.28139	1	4298	tags=48%, list=18%, signal=58%
WU_HBX_TARGETS_2_UP	WU_HBX_TARGETS_2_UP		22	0.457225	1.23798	0.174519	0.28177	1	2718	tags=27%, list=12%, signal=31%
LOPES_METHYLATED_IN_COLON_CANCER_DN	LOPES_METHYLATED_IN_COLON_CANCER_DN		26	0.437122	1.23751	0.167646	0.282269	1	3108	tags=27%, list=13%, signal=31%
EPPERT_LSC_R	EPPERT_LSC_R		34	0.413401	1.23751	0.151822	0.282	1	1567	tags=21%, list=7%, signal=22%
ZWANG_EGF_PERSISTENTLY_UP	ZWANG_EGF_PERSISTENTLY_UP		27	0.435718	1.23737	0.169364	0.281949	1	4090	tags=33%, list=17%, signal=40%
HAN_SATB1_TARGETS_UP	HAN_SATB1_TARGETS_UP		354	0.290724	1.23697	0.022541	0.282328	1	3982	tags=26%, list=17%, signal=31%
KEGG_PENTOSE_PHOSPHATE_PATHWAY	KEGG_PENTOSE_PHOSPHATE_PATHWAY		24	0.444912	1.23689	0.169889	0.282194	1	5097	tags=50%, list=22%, signal=64%
JISON_SICKLE_CELL_DISEASE_DN	JISON_SICKLE_CELL_DISEASE_DN		169	0.313206	1.23647	0.054425	0.28259	1	5046	tags=40%, list=22%, signal=50%
PID_REELIN_PATHWAY	PID_REELIN_PATHWAY		29	0.427344	1.23629	0.16443	0.282606	1	4363	tags=34%, list=19%, signal=42%
BIOCARTA_RAS_PATHWAY	BIOCARTA_RAS_PATHWAY		22	0.457238	1.23606	0.186495	0.282722	1	4238	tags=45%, list=18%, signal=55%
CHOI_ATL_CHRONIC_VS_ACUTE_DN	CHOI_ATL_CHRONIC_VS_ACUTE_DN		18	0.480956	1.23525	0.191906	0.283792	1	3928	tags=39%, list=17%, signal=47%
KOYAMA_SEMA3B_TARGETS_DN	KOYAMA_SEMA3B_TARGETS_DN		352	0.289859	1.23522	0.0213264	0.283564	1	3894	tags=26%, list=17%, signal=31%
LENAOUR_DENDRITIC_CELL_MATURATION_UP	LENAOUR_DENDRITIC_CELL_MATURATION_UP		99	0.337613	1.23424	0.0896269	0.284919	1	1269	tags=13%, list=5%, signal=14%
ACEVEDO_FGFR1_TARGETS_IN_PROSTATE_CANCER_MODEL_UP	ACEVEDO_FGFR1_TARGETS_IN_PROSTATE_CANCER_MODEL_UP		265	0.298249	1.23404	0.03663	0.284979	1	2237	tags=20%, list=10%, signal=21%
BORLAK_LIVER_CANCER_EGF_UP	BORLAK_LIVER_CANCER_EGF_UP		53	0.376909	1.23224	0.132866	0.287709	1	2661	tags=23%, list=11%, signal=25%
LEE_CALORIE_RESTRICTION_NEOCORTEX_DN	LEE_CALORIE_RESTRICTION_NEOCORTEX_DN		84	0.346724	1.23115	0.103157	0.289236	1	4862	tags=35%, list=21%, signal=43%
HELLER_HDAC_TARGETS_UP	HELLER_HDAC_TARGETS_UP		270	0.297403	1.23056	0.0381166	0.289953	1	4124	tags=30%, list=18%, signal=36%
FRIDMAN_SENESCENCE_UP	FRIDMAN_SENESCENCE_UP		72	0.353887	1.22998	0.111908	0.290639	1	3832	tags=31%, list=16%, signal=36%
RODWELL_AGING_KIDNEY_NO_BLOOD_DN	RODWELL_AGING_KIDNEY_NO_BLOOD_DN		133	0.321677	1.22816	0.0754672	0.293463	1	2835	tags=23%, list=12%, signal=26%
WHITFIELD_CELL_CYCLE_M_G1	WHITFIELD_CELL_CYCLE_M_G1		130	0.323414	1.22795	0.0795376	0.293553	1	5181	tags=38%, list=22%, signal=48%
REACTOME_UNFOLDED_PROTEIN_RESPONSE	REACTOME_UNFOLDED_PROTEIN_RESPONSE		74	0.353687	1.22751	0.116889	0.294014	1	4206	tags=30%, list=18%, signal=36%
MCBRYAN_PUBERTAL_BREAST_6_7WK_DN	MCBRYAN_PUBERTAL_BREAST_6_7WK_DN		73	0.351814	1.22714	0.117896	0.294349	1	3885	tags=36%, list=17%, signal=43%
TOMLINS_PROSTATE_CANCER_UP	TOMLINS_PROSTATE_CANCER_UP		37	0.403654	1.22686	0.159563	0.294548	1	4426	tags=49%, list=19%, signal=60%
BEIER_GLIOMA_STEM_CELL_DN	BEIER_GLIOMA_STEM_CELL_DN		53	0.374657	1.22643	0.139454	0.295004	1	1639	tags=15%, list=7%, signal=16%
KEGG_AMYOTROPHIC_LATERAL_SCLEROSIS_ALS	KEGG_AMYOTROPHIC_LATERAL_SCLEROSIS_ALS		51	0.375069	1.22639	0.140489	0.294793	1	4249	tags=29%, list=18%, signal=36%
OSMAN_BLADDER_CANCER_UP	OSMAN_BLADDER_CANCER_UP		363	0.287308	1.2263	0.0248834	0.294664	1	4053	tags=27%, list=17%, signal=32%
MARTORIATI_MDM4_TARGETS_NEUROEPITHELIUM_UP	MARTORIATI_MDM4_TARGETS_NEUROEPITHELIUM_UP		155	0.314608	1.2262	0.0716946	0.294558	1	2724	tags=23%, list=12%, signal=26%
POOLA_INVASIVE_BREAST_CANCER_UP	POOLA_INVASIVE_BREAST_CANCER_UP		249	0.298544	1.22586	0.042233	0.294858	1	3229	tags=27%, list=14%, signal=30%
SIMBULAN_UV_RESPONSE_NORMAL_DN	SIMBULAN_UV_RESPONSE_NORMAL_DN		32	0.414972	1.22525	0.167398	0.295621	1	713	tags=16%, list=3%, signal=16%
KUMAR_PATHOGEN_LOAD_BY_MACROPHAGES	KUMAR_PATHOGEN_LOAD_BY_MACROPHAGES		216	0.302923	1.2252	0.0527072	0.295423	1	4282	tags=30%, list=18%, signal=36%
BOYLAN_MULTIPLE_MYELOMA_D_CLUSTER_DN	BOYLAN_MULTIPLE_MYELOMA_D_CLUSTER_DN		40	0.393754	1.22489	0.15518	0.295689	1	3572	tags=38%, list=15%, signal=44%
ZHANG_ANTIVIRAL_RESPONSE_TO_RIBAVIRIN_DN	ZHANG_ANTIVIRAL_RESPONSE_TO_RIBAVIRIN_DN		51	0.374528	1.22483	0.142888	0.295512	1	4049	tags=33%, list=17%, signal=40%
CHEMELLO_SOLEUS_VS_EDL_MYOFIBERS_UP	CHEMELLO_SOLEUS_VS_EDL_MYOFIBERS_UP		34	0.408	1.22433	0.168542	0.296088	1	4491	tags=29%, list=19%, signal=36%
PID_FCER1_PATHWAY	PID_FCER1_PATHWAY		59	0.36454	1.22419	0.136082	0.29603	1	1887	tags=20%, list=8%, signal=22%
KEGG_COLORECTAL_CANCER	KEGG_COLORECTAL_CANCER		61	0.36265	1.22379	0.136434	0.29644	1	4478	tags=34%, list=19%, signal=42%
WANG_RESPONSE_TO_FORSKOLIN_UP	WANG_RESPONSE_TO_FORSKOLIN_UP		20	0.463297	1.22374	0.193902	0.296253	1	5873	tags=60%, list=25%, signal=80%
REACTOME_RAP1_SIGNALLING	REACTOME_RAP1_SIGNALLING		15	0.498031	1.22304	0.208571	0.297166	1	2949	tags=33%, list=13%, signal=38%
HEIDENBLAD_AMPLICON_8Q24_UP	HEIDENBLAD_AMPLICON_8Q24_UP		30	0.418674	1.22301	0.172631	0.296929	1	4375	tags=43%, list=19%, signal=53%
ZUCCHI_METASTASIS_DN	ZUCCHI_METASTASIS_DN		40	0.395669	1.22284	0.158214	0.296942	1	5803	tags=55%, list=25%, signal=73%
KEGG_FOCAL_ADHESION	KEGG_FOCAL_ADHESION		194	0.305016	1.22175	0.0584526	0.298528	1	2499	tags=18%, list=11%, signal=20%
REACTOME_BASIGIN_INTERACTIONS	REACTOME_BASIGIN_INTERACTIONS		23	0.445188	1.22135	0.18874	0.298938	1	3078	tags=35%, list=13%, signal=40%
REACTOME_CHYLOMICRON_MEDIATED_LIPID_TRANSPORT	REACTOME_CHYLOMICRON_MEDIATED_LIPID_TRANSPORT		16	0.488698	1.2205	0.200339	0.300112	1	2523	tags=25%, list=11%, signal=28%
WESTON_VEGFA_TARGETS	WESTON_VEGFA_TARGETS		104	0.330658	1.22045	0.104903	0.299918	1	1788	tags=17%, list=8%, signal=19%
CHUNG_BLISTER_CYTOTOXICITY_DN	CHUNG_BLISTER_CYTOTOXICITY_DN		39	0.396336	1.21988	0.164675	0.300638	1	2114	tags=26%, list=9%, signal=28%
UEDA_PERIFERAL_CLOCK	UEDA_PERIFERAL_CLOCK		159	0.310924	1.21986	0.0728994	0.30039	1	5095	tags=36%, list=22%, signal=46%
HOLLEMAN_PREDNISOLONE_RESISTANCE_ALL_UP	HOLLEMAN_PREDNISOLONE_RESISTANCE_ALL_UP		17	0.48038	1.2195	0.199746	0.300721	1	5900	tags=59%, list=25%, signal=79%
BERENJENO_ROCK_SIGNALING_NOT_VIA_RHOA_UP	BERENJENO_ROCK_SIGNALING_NOT_VIA_RHOA_UP		27	0.42839	1.21928	0.184405	0.300827	1	3234	tags=30%, list=14%, signal=34%
HARRIS_HYPOXIA	HARRIS_HYPOXIA		74	0.350881	1.21857	0.119804	0.301772	1	3442	tags=27%, list=15%, signal=32%
BIOCARTA_CCR5_PATHWAY	BIOCARTA_CCR5_PATHWAY		17	0.478554	1.21806	0.202856	0.302357	1	1539	tags=29%, list=7%, signal=31%
DARWICHE_SQUAMOUS_CELL_CARCINOMA_UP	DARWICHE_SQUAMOUS_CELL_CARCINOMA_UP		128	0.319728	1.21789	0.0894923	0.30238	1	3656	tags=27%, list=16%, signal=31%
HEDENFALK_BREAST_CANCER_BRACX_UP	HEDENFALK_BREAST_CANCER_BRACX_UP		19	0.467973	1.21747	0.197113	0.302857	1	2767	tags=53%, list=12%, signal=60%
KENNY_CTNNB1_TARGETS_DN	KENNY_CTNNB1_TARGETS_DN		51	0.371797	1.21737	0.14765	0.30274	1	3972	tags=35%, list=17%, signal=42%
REACTOME_LOSS_OF_NLP_FROM_MITOTIC_CENTROSOMES	REACTOME_LOSS_OF_NLP_FROM_MITOTIC_CENTROSOMES		53	0.372806	1.21732	0.145118	0.302557	1	5007	tags=40%, list=21%, signal=50%
REACTOME_PEROXISOMAL_LIPID_METABOLISM	REACTOME_PEROXISOMAL_LIPID_METABOLISM		19	0.463907	1.2165	0.201405	0.303701	1	3559	tags=37%, list=15%, signal=43%
FAELT_B_CLL_WITH_VH3_21_DN	FAELT_B_CLL_WITH_VH3_21_DN		45	0.381776	1.21645	0.159186	0.303492	1	3693	tags=36%, list=16%, signal=42%
HOSHIDA_LIVER_CANCER_SUBCLASS_S2	HOSHIDA_LIVER_CANCER_SUBCLASS_S2		111	0.326411	1.21624	0.0999771	0.303589	1	3820	tags=25%, list=16%, signal=30%
REACTOME_ENDOSOMAL_SORTING_COMPLEX_REQUIRED_FOR_TRANSPORT_ESCRT	REACTOME_ENDOSOMAL_SORTING_COMPLEX_REQUIRED_FOR_TRANSPORT_ESCRT		25	0.435932	1.21612	0.189055	0.303507	1	4512	tags=44%, list=19%, signal=54%
KAAB_HEART_ATRIUM_VS_VENTRICLE_UP	KAAB_HEART_ATRIUM_VS_VENTRICLE_UP		235	0.29655	1.21585	0.0511433	0.303707	1	3840	tags=27%, list=16%, signal=32%
TORCHIA_TARGETS_OF_EWSR1_FLI1_FUSION_DN	TORCHIA_TARGETS_OF_EWSR1_FLI1_FUSION_DN		292	0.29001	1.21577	0.0351709	0.303552	1	3104	tags=23%, list=13%, signal=27%
KIM_MYC_AMPLIFICATION_TARGETS_UP	KIM_MYC_AMPLIFICATION_TARGETS_UP		183	0.304722	1.21551	0.0727359	0.30373	1	4728	tags=38%, list=20%, signal=48%
REACTOME_SEMA4D_INDUCED_CELL_MIGRATION_AND_GROWTH_CONE_COLLAPSE	REACTOME_SEMA4D_INDUCED_CELL_MIGRATION_AND_GROWTH_CONE_COLLAPSE		24	0.436964	1.21492	0.193114	0.304485	1	2482	tags=25%, list=11%, signal=28%
ELVIDGE_HYPOXIA_DN	ELVIDGE_HYPOXIA_DN		134	0.317558	1.21409	0.0862394	0.305637	1	4122	tags=28%, list=18%, signal=34%
RUTELLA_RESPONSE_TO_CSF2RB_AND_IL4_DN	RUTELLA_RESPONSE_TO_CSF2RB_AND_IL4_DN		273	0.292907	1.21407	0.0433818	0.305397	1	2506	tags=21%, list=11%, signal=24%
JAIN_NFKB_SIGNALING	JAIN_NFKB_SIGNALING		70	0.35024	1.21394	0.123638	0.305335	1	3873	tags=26%, list=17%, signal=31%
BIOCARTA_SPPA_PATHWAY	BIOCARTA_SPPA_PATHWAY		21	0.451851	1.21377	0.196235	0.305355	1	578	tags=19%, list=2%, signal=20%
VERHAAK_AML_WITH_NPM1_MUTATED_UP	VERHAAK_AML_WITH_NPM1_MUTATED_UP		162	0.310511	1.21335	0.0789904	0.305811	1	3307	tags=25%, list=14%, signal=29%
WAMUNYOKOLI_OVARIAN_CANCER_LMP_UP	WAMUNYOKOLI_OVARIAN_CANCER_LMP_UP		236	0.296214	1.21326	0.0538051	0.305699	1	3326	tags=24%, list=14%, signal=27%
DIAZ_CHRONIC_MEYLOGENOUS_LEUKEMIA_DN	DIAZ_CHRONIC_MEYLOGENOUS_LEUKEMIA_DN		104	0.329911	1.21307	0.109745	0.305748	1	1609	tags=25%, list=7%, signal=27%
ROSS_AML_WITH_MLL_FUSIONS	ROSS_AML_WITH_MLL_FUSIONS		66	0.353247	1.21187	0.135544	0.307538	1	2719	tags=30%, list=12%, signal=34%
PHONG_TNF_RESPONSE_VIA_P38_COMPLETE	PHONG_TNF_RESPONSE_VIA_P38_COMPLETE		213	0.299058	1.21139	0.0622887	0.308104	1	2951	tags=23%, list=13%, signal=27%
WENG_POR_TARGETS_LIVER_DN	WENG_POR_TARGETS_LIVER_DN		20	0.458367	1.21039	0.19966	0.309598	1	5793	tags=55%, list=25%, signal=73%
REACTOME_POST_TRANSLATIONAL_MODIFICATION_SYNTHESIS_OF_GPI_ANCHORED_PROTEINS	REACTOME_POST_TRANSLATIONAL_MODIFICATION_SYNTHESIS_OF_GPI_ANCHORED_PROTEINS		26	0.429902	1.21032	0.196476	0.309436	1	6297	tags=54%, list=27%, signal=74%
SASSON_RESPONSE_TO_FORSKOLIN_DN	SASSON_RESPONSE_TO_FORSKOLIN_DN		83	0.339598	1.21029	0.118519	0.309214	1	4491	tags=29%, list=19%, signal=36%
KYNG_DNA_DAMAGE_BY_UV	KYNG_DNA_DAMAGE_BY_UV		60	0.358895	1.21004	0.14552	0.309367	1	1341	tags=15%, list=6%, signal=16%
REACTOME_PLATELET_HOMEOSTASIS	REACTOME_PLATELET_HOMEOSTASIS		76	0.346896	1.20951	0.129584	0.310011	1	3566	tags=32%, list=15%, signal=37%
REACTOME_CONVERSION_FROM_APC_C_CDC20_TO_APC_C_CDH1_IN_LATE_ANAPHASE	REACTOME_CONVERSION_FROM_APC_C_CDC20_TO_APC_C_CDH1_IN_LATE_ANAPHASE		16	0.483182	1.20949	0.214407	0.309754	1	5711	tags=50%, list=24%, signal=66%
MAEKAWA_ATF2_TARGETS	MAEKAWA_ATF2_TARGETS		24	0.436912	1.2079	0.200043	0.312295	1	1712	tags=21%, list=7%, signal=22%
THUM_SYSTOLIC_HEART_FAILURE_UP	THUM_SYSTOLIC_HEART_FAILURE_UP		363	0.282668	1.20742	0.0318538	0.312868	1	4344	tags=31%, list=19%, signal=37%
NAKAMURA_CANCER_MICROENVIRONMENT_UP	NAKAMURA_CANCER_MICROENVIRONMENT_UP		18	0.469612	1.20736	0.209567	0.312691	1	1130	tags=22%, list=5%, signal=23%
LIN_APC_TARGETS	LIN_APC_TARGETS		75	0.345793	1.20653	0.135302	0.313882	1	4302	tags=36%, list=18%, signal=44%
PID_AR_PATHWAY	PID_AR_PATHWAY		57	0.359868	1.20642	0.151078	0.313804	1	2489	tags=28%, list=11%, signal=31%
THEILGAARD_NEUTROPHIL_AT_SKIN_WOUND_DN	THEILGAARD_NEUTROPHIL_AT_SKIN_WOUND_DN		219	0.296852	1.20634	0.0647675	0.313647	1	3565	tags=26%, list=15%, signal=31%
ZHAN_MULTIPLE_MYELOMA_UP	ZHAN_MULTIPLE_MYELOMA_UP		60	0.356518	1.20556	0.149377	0.314758	1	3976	tags=37%, list=17%, signal=44%
PID_HIF1A_PATHWAY	PID_HIF1A_PATHWAY		18	0.465859	1.20545	0.209532	0.314668	1	5181	tags=61%, list=22%, signal=78%
KEGG_PEROXISOME	KEGG_PEROXISOME		76	0.344413	1.20526	0.135111	0.314736	1	4220	tags=33%, list=18%, signal=40%
AIYAR_COBRA1_TARGETS_DN	AIYAR_COBRA1_TARGETS_DN		23	0.441111	1.20489	0.198402	0.315111	1	5339	tags=48%, list=23%, signal=62%
GRUETZMANN_PANCREATIC_CANCER_DN	GRUETZMANN_PANCREATIC_CANCER_DN		191	0.302172	1.20437	0.0812087	0.31574	1	3820	tags=27%, list=16%, signal=32%
REACTOME_PHASE_II_CONJUGATION	REACTOME_PHASE_II_CONJUGATION		52	0.367618	1.20331	0.162536	0.317351	1	2137	tags=17%, list=9%, signal=19%
ENK_UV_RESPONSE_EPIDERMIS_UP	ENK_UV_RESPONSE_EPIDERMIS_UP		263	0.290341	1.20331	0.056576	0.317069	1	5191	tags=33%, list=22%, signal=42%
AZARE_STAT3_TARGETS	AZARE_STAT3_TARGETS		22	0.443813	1.20324	0.203704	0.316906	1	3827	tags=32%, list=16%, signal=38%
PID_ALK1_PATHWAY	PID_ALK1_PATHWAY		26	0.423387	1.20305	0.196901	0.316959	1	2331	tags=23%, list=10%, signal=26%
WANG_METASTASIS_OF_BREAST_CANCER_ESR1_UP	WANG_METASTASIS_OF_BREAST_CANCER_ESR1_UP		19	0.456531	1.20258	0.210759	0.317533	1	4797	tags=53%, list=20%, signal=66%
AKL_HTLV1_INFECTION_DN	AKL_HTLV1_INFECTION_DN		65	0.352688	1.2021	0.139218	0.318108	1	4910	tags=38%, list=21%, signal=49%
MILI_PSEUDOPODIA_CHEMOTAXIS_DN	MILI_PSEUDOPODIA_CHEMOTAXIS_DN		433	0.27705	1.20146	0.0294659	0.318995	1	3820	tags=28%, list=16%, signal=33%
KEGG_ALLOGRAFT_REJECTION	KEGG_ALLOGRAFT_REJECTION		16	0.480267	1.20141	0.229445	0.318784	1	504	tags=19%, list=2%, signal=19%
WHITE_NEUROBLASTOMA_WITH_1P36.3_DELETION	WHITE_NEUROBLASTOMA_WITH_1P36.3_DELETION		20	0.458236	1.20133	0.214623	0.318655	1	2894	tags=30%, list=12%, signal=34%
SCHOEN_NFKB_SIGNALING	SCHOEN_NFKB_SIGNALING		33	0.405777	1.201	0.194187	0.318956	1	5278	tags=42%, list=23%, signal=55%
DELACROIX_RAR_BOUND_ES	DELACROIX_RAR_BOUND_ES		419	0.277435	1.20037	0.0374902	0.319814	1	4393	tags=29%, list=19%, signal=35%
PID_INTEGRIN5_PATHWAY	PID_INTEGRIN5_PATHWAY		17	0.471452	1.2002	0.223692	0.319828	1	1490	tags=24%, list=6%, signal=25%
NIELSEN_GIST_AND_SYNOVIAL_SARCOMA_DN	NIELSEN_GIST_AND_SYNOVIAL_SARCOMA_DN		20	0.455123	1.20017	0.213739	0.319602	1	602	tags=20%, list=3%, signal=21%
YAO_TEMPORAL_RESPONSE_TO_PROGESTERONE_CLUSTER_12	YAO_TEMPORAL_RESPONSE_TO_PROGESTERONE_CLUSTER_12		75	0.34307	1.19964	0.144128	0.320285	1	3395	tags=31%, list=14%, signal=36%
ONDER_CDH1_TARGETS_1_DN	ONDER_CDH1_TARGETS_1_DN		154	0.307496	1.19933	0.0912689	0.320566	1	2965	tags=21%, list=13%, signal=24%
BIOCARTA_FCER1_PATHWAY	BIOCARTA_FCER1_PATHWAY		37	0.393151	1.198	0.186107	0.322682	1	1953	tags=24%, list=8%, signal=26%
MILI_PSEUDOPODIA_HAPTOTAXIS_UP	MILI_PSEUDOPODIA_HAPTOTAXIS_UP		468	0.274582	1.198	0.0287387	0.322396	1	5193	tags=32%, list=22%, signal=40%
ENK_UV_RESPONSE_EPIDERMIS_DN	ENK_UV_RESPONSE_EPIDERMIS_DN		477	0.274293	1.19787	0.0253432	0.322352	1	2974	tags=19%, list=13%, signal=22%
LIM_MAMMARY_STEM_CELL_DN	LIM_MAMMARY_STEM_CELL_DN		394	0.278076	1.19772	0.0343392	0.322346	1	3982	tags=28%, list=17%, signal=33%
KEGG_N_GLYCAN_BIOSYNTHESIS	KEGG_N_GLYCAN_BIOSYNTHESIS		44	0.379314	1.19735	0.175623	0.322737	1	4042	tags=39%, list=17%, signal=47%
MATZUK_SPERMATOZOA	MATZUK_SPERMATOZOA		108	0.323473	1.19714	0.11827	0.32284	1	3508	tags=23%, list=15%, signal=27%
LU_TUMOR_ENDOTHELIAL_MARKERS_UP	LU_TUMOR_ENDOTHELIAL_MARKERS_UP		20	0.45068	1.19681	0.217979	0.323134	1	4828	tags=60%, list=21%, signal=76%
BOYAULT_LIVER_CANCER_SUBCLASS_G123_UP	BOYAULT_LIVER_CANCER_SUBCLASS_G123_UP		43	0.379809	1.19663	0.178055	0.323177	1	4092	tags=35%, list=17%, signal=42%
GALLUZZI_PERMEABILIZE_MITOCHONDRIA	GALLUZZI_PERMEABILIZE_MITOCHONDRIA		41	0.382469	1.19634	0.172834	0.32343	1	4763	tags=39%, list=20%, signal=49%
WINZEN_DEGRADED_VIA_KHSRP	WINZEN_DEGRADED_VIA_KHSRP		97	0.32729	1.196	0.122365	0.323758	1	1024	tags=13%, list=4%, signal=14%
WANG_TARGETS_OF_MLL_CBP_FUSION_UP	WANG_TARGETS_OF_MLL_CBP_FUSION_UP		40	0.385969	1.19591	0.178316	0.323637	1	2511	tags=25%, list=11%, signal=28%
VANHARANTA_UTERINE_FIBROID_WITH_7Q_DELETION_UP	VANHARANTA_UTERINE_FIBROID_WITH_7Q_DELETION_UP		65	0.349644	1.19557	0.15573	0.323974	1	4530	tags=35%, list=19%, signal=44%
REACTOME_MYD88_MAL_CASCADE_INITIATED_ON_PLASMA_MEMBRANE	REACTOME_MYD88_MAL_CASCADE_INITIATED_ON_PLASMA_MEMBRANE		79	0.339739	1.19533	0.139545	0.324125	1	2204	tags=18%, list=9%, signal=19%
DE_YY1_TARGETS_DN	DE_YY1_TARGETS_DN		91	0.330416	1.19515	0.128455	0.324169	1	4488	tags=31%, list=19%, signal=38%
FONTAINE_THYROID_TUMOR_UNCERTAIN_MALIGNANCY_UP	FONTAINE_THYROID_TUMOR_UNCERTAIN_MALIGNANCY_UP		33	0.400998	1.19505	0.190018	0.32408	1	4092	tags=39%, list=17%, signal=48%
CHIARADONNA_NEOPLASTIC_TRANSFORMATION_KRAS_DN	CHIARADONNA_NEOPLASTIC_TRANSFORMATION_KRAS_DN		139	0.311114	1.19479	0.101974	0.324268	1	3751	tags=30%, list=16%, signal=36%
MILI_PSEUDOPODIA_CHEMOTAXIS_UP	MILI_PSEUDOPODIA_CHEMOTAXIS_UP		66	0.348631	1.1942	0.156222	0.325054	1	4845	tags=41%, list=21%, signal=51%
SHIPP_DLBCL_CURED_VS_FATAL_DN	SHIPP_DLBCL_CURED_VS_FATAL_DN		40	0.387412	1.19415	0.184969	0.32487	1	4325	tags=40%, list=18%, signal=49%
REACTOME_SIGNALING_BY_EGFR_IN_CANCER	REACTOME_SIGNALING_BY_EGFR_IN_CANCER		103	0.323655	1.19352	0.125769	0.325732	1	4668	tags=35%, list=20%, signal=43%
BIOCARTA_CHEMICAL_PATHWAY	BIOCARTA_CHEMICAL_PATHWAY		21	0.443089	1.1934	0.214471	0.325678	1	4763	tags=38%, list=20%, signal=48%
AMIT_SERUM_RESPONSE_480_MCF10A	AMIT_SERUM_RESPONSE_480_MCF10A		34	0.398546	1.19175	0.19267	0.328409	1	6714	tags=47%, list=29%, signal=66%
REACTOME_REGULATION_OF_HYPOXIA_INDUCIBLE_FACTOR_HIF_BY_OXYGEN	REACTOME_REGULATION_OF_HYPOXIA_INDUCIBLE_FACTOR_HIF_BY_OXYGEN		21	0.443397	1.19129	0.21624	0.328942	1	5927	tags=67%, list=25%, signal=89%
REACTOME_TRNA_AMINOACYLATION	REACTOME_TRNA_AMINOACYLATION		42	0.380175	1.1906	0.189309	0.329931	1	3765	tags=36%, list=16%, signal=42%
SMID_BREAST_CANCER_RELAPSE_IN_BONE_DN	SMID_BREAST_CANCER_RELAPSE_IN_BONE_DN		280	0.284999	1.19055	0.0636611	0.329744	1	3999	tags=26%, list=17%, signal=31%
SMID_BREAST_CANCER_ERBB2_UP	SMID_BREAST_CANCER_ERBB2_UP		119	0.316378	1.19043	0.118934	0.329673	1	4066	tags=27%, list=17%, signal=32%
BERTUCCI_MEDULLARY_VS_DUCTAL_BREAST_CANCER_UP	BERTUCCI_MEDULLARY_VS_DUCTAL_BREAST_CANCER_UP		179	0.29989	1.19042	0.0915343	0.329411	1	4850	tags=37%, list=21%, signal=47%
LIU_IL13_MEMORY_MODEL_UP	LIU_IL13_MEMORY_MODEL_UP		16	0.476726	1.19036	0.236239	0.329231	1	3081	tags=44%, list=13%, signal=50%
VALK_AML_CLUSTER_10	VALK_AML_CLUSTER_10		29	0.411311	1.18942	0.206415	0.330707	1	1608	tags=17%, list=7%, signal=18%
VANHARANTA_UTERINE_FIBROID_UP	VANHARANTA_UTERINE_FIBROID_UP		44	0.377944	1.18915	0.18359	0.330925	1	3985	tags=30%, list=17%, signal=36%
KEGG_STARCH_AND_SUCROSE_METABOLISM	KEGG_STARCH_AND_SUCROSE_METABOLISM		33	0.398759	1.18736	0.190816	0.333964	1	5143	tags=42%, list=22%, signal=54%
REACTOME_DESTABILIZATION_OF_MRNA_BY_BRF1	REACTOME_DESTABILIZATION_OF_MRNA_BY_BRF1		17	0.465085	1.18692	0.237527	0.334481	1	2949	tags=35%, list=13%, signal=40%
OKAWA_NEUROBLASTOMA_1P36_31_DELETION	OKAWA_NEUROBLASTOMA_1P36_31_DELETION		22	0.438497	1.18649	0.211857	0.334982	1	2894	tags=27%, list=12%, signal=31%
MCDOWELL_ACUTE_LUNG_INJURY_UP	MCDOWELL_ACUTE_LUNG_INJURY_UP		42	0.380023	1.18598	0.192859	0.335655	1	3734	tags=36%, list=16%, signal=42%
TOYOTA_TARGETS_OF_MIR34B_AND_MIR34C	TOYOTA_TARGETS_OF_MIR34B_AND_MIR34C		395	0.275607	1.1859	0.0424541	0.335515	1	5171	tags=34%, list=22%, signal=42%
JAZAERI_BREAST_CANCER_BRCA1_VS_BRCA2_UP	JAZAERI_BREAST_CANCER_BRCA1_VS_BRCA2_UP		48	0.369422	1.18584	0.176522	0.335338	1	5130	tags=44%, list=22%, signal=56%
GAZDA_DIAMOND_BLACKFAN_ANEMIA_ERYTHROID_DN	GAZDA_DIAMOND_BLACKFAN_ANEMIA_ERYTHROID_DN		420	0.274066	1.18565	0.0434783	0.335393	1	3949	tags=28%, list=17%, signal=33%
EHLERS_ANEUPLOIDY_UP	EHLERS_ANEUPLOIDY_UP		41	0.381009	1.1854	0.191109	0.33557	1	3840	tags=34%, list=16%, signal=41%
HOFFMANN_PRE_BI_TO_LARGE_PRE_BII_LYMPHOCYTE_UP	HOFFMANN_PRE_BI_TO_LARGE_PRE_BII_LYMPHOCYTE_UP		34	0.395433	1.18527	0.201756	0.335535	1	5602	tags=50%, list=24%, signal=66%
DOANE_BREAST_CANCER_CLASSES_UP	DOANE_BREAST_CANCER_CLASSES_UP		61	0.350351	1.18488	0.169255	0.335992	1	6180	tags=36%, list=26%, signal=49%
BIOCARTA_AKT_PATHWAY	BIOCARTA_AKT_PATHWAY		20	0.446924	1.18472	0.221629	0.336005	1	4238	tags=35%, list=18%, signal=43%
DIRMEIER_LMP1_RESPONSE_EARLY	DIRMEIER_LMP1_RESPONSE_EARLY		64	0.349395	1.18464	0.168686	0.335857	1	4247	tags=31%, list=18%, signal=38%
REACTOME_GLUCONEOGENESIS	REACTOME_GLUCONEOGENESIS		28	0.411997	1.18402	0.211218	0.336716	1	2921	tags=29%, list=12%, signal=33%
REACTOME_INTERACTIONS_OF_VPR_WITH_HOST_CELLULAR_PROTEINS	REACTOME_INTERACTIONS_OF_VPR_WITH_HOST_CELLULAR_PROTEINS		31	0.402488	1.18397	0.212433	0.336517	1	5538	tags=45%, list=24%, signal=59%
PID_PS1_PATHWAY	PID_PS1_PATHWAY		46	0.371793	1.18386	0.183656	0.336443	1	2663	tags=20%, list=11%, signal=22%
MISSIAGLIA_REGULATED_BY_METHYLATION_UP	MISSIAGLIA_REGULATED_BY_METHYLATION_UP		111	0.318336	1.18367	0.134917	0.336524	1	4603	tags=30%, list=20%, signal=37%
WINTER_HYPOXIA_METAGENE	WINTER_HYPOXIA_METAGENE		219	0.29151	1.1834	0.0815204	0.336745	1	2992	tags=25%, list=13%, signal=29%
REACTOME_LIPOPROTEIN_METABOLISM	REACTOME_LIPOPROTEIN_METABOLISM		26	0.420075	1.18328	0.215569	0.336676	1	586	tags=15%, list=3%, signal=16%
BIOCARTA_MEF2D_PATHWAY	BIOCARTA_MEF2D_PATHWAY		18	0.456984	1.1832	0.22762	0.336538	1	2361	tags=39%, list=10%, signal=43%
PID_RET_PATHWAY	PID_RET_PATHWAY		38	0.385676	1.18292	0.194625	0.336776	1	2499	tags=21%, list=11%, signal=24%
REACTOME_TRANSPORT_OF_MATURE_TRANSCRIPT_TO_CYTOPLASM	REACTOME_TRANSPORT_OF_MATURE_TRANSCRIPT_TO_CYTOPLASM		52	0.363283	1.1829	0.178626	0.336511	1	5158	tags=38%, list=22%, signal=49%
REACTOME_REGULATION_OF_INSULIN_SECRETION_BY_GLUCAGON_LIKE_PEPTIDE1	REACTOME_REGULATION_OF_INSULIN_SECRETION_BY_GLUCAGON_LIKE_PEPTIDE1		41	0.377662	1.1823	0.194124	0.337367	1	3419	tags=34%, list=15%, signal=40%
REACTOME_PRE_NOTCH_PROCESSING_IN_GOLGI	REACTOME_PRE_NOTCH_PROCESSING_IN_GOLGI		16	0.472631	1.18221	0.235418	0.337226	1	3278	tags=38%, list=14%, signal=44%
WOO_LIVER_CANCER_RECURRENCE_DN	WOO_LIVER_CANCER_RECURRENCE_DN		64	0.348787	1.18099	0.166332	0.33925	1	2892	tags=19%, list=12%, signal=21%
SCHAEFFER_PROSTATE_DEVELOPMENT_AND_CANCER_BOX4_DN	SCHAEFFER_PROSTATE_DEVELOPMENT_AND_CANCER_BOX4_DN		30	0.404763	1.18091	0.218154	0.339102	1	3694	tags=33%, list=16%, signal=40%
JAATINEN_HEMATOPOIETIC_STEM_CELL_DN	JAATINEN_HEMATOPOIETIC_STEM_CELL_DN		189	0.295796	1.18041	0.0946433	0.339772	1	2960	tags=26%, list=13%, signal=29%
WATANABE_ULCERATIVE_COLITIS_WITH_CANCER_UP	WATANABE_ULCERATIVE_COLITIS_WITH_CANCER_UP		18	0.453966	1.17972	0.234378	0.340788	1	5729	tags=44%, list=24%, signal=59%
LABBE_TARGETS_OF_TGFB1_AND_WNT3A_UP	LABBE_TARGETS_OF_TGFB1_AND_WNT3A_UP		104	0.320106	1.17959	0.137947	0.340752	1	1454	tags=16%, list=6%, signal=17%
MULLIGHAN_MLL_SIGNATURE_1_UP	MULLIGHAN_MLL_SIGNATURE_1_UP		338	0.278107	1.17936	0.0517825	0.340893	1	4536	tags=31%, list=19%, signal=38%
PID_TOLL_ENDOGENOUS_PATHWAY	PID_TOLL_ENDOGENOUS_PATHWAY		25	0.421037	1.17929	0.225785	0.340752	1	2261	tags=32%, list=10%, signal=35%
ROSS_LEUKEMIA_WITH_MLL_FUSIONS	ROSS_LEUKEMIA_WITH_MLL_FUSIONS		68	0.342563	1.17912	0.163523	0.340776	1	2292	tags=26%, list=10%, signal=29%
KIM_TIAL1_TARGETS	KIM_TIAL1_TARGETS		30	0.403866	1.17841	0.207482	0.341852	1	5091	tags=50%, list=22%, signal=64%
REACTOME_REGULATION_OF_GENE_EXPRESSION_IN_BETA_CELLS	REACTOME_REGULATION_OF_GENE_EXPRESSION_IN_BETA_CELLS		19	0.452475	1.17828	0.235294	0.341815	1	560	tags=11%, list=2%, signal=11%
REACTOME_OXYGEN_DEPENDENT_PROLINE_HYDROXYLATION_OF_HYPOXIA_INDUCIBLE_FACTOR_ALPHA	REACTOME_OXYGEN_DEPENDENT_PROLINE_HYDROXYLATION_OF_HYPOXIA_INDUCIBLE_FACTOR_ALPHA		15	0.476705	1.17782	0.247385	0.342387	1	3413	tags=47%, list=15%, signal=55%
WAKABAYASHI_ADIPOGENESIS_PPARG_RXRA_BOUND_WITH_H4K20ME1_MARK	WAKABAYASHI_ADIPOGENESIS_PPARG_RXRA_BOUND_WITH_H4K20ME1_MARK		133	0.308141	1.17744	0.122439	0.342812	1	3141	tags=27%, list=13%, signal=31%
KORKOLA_EMBRYONAL_CARCINOMA_UP	KORKOLA_EMBRYONAL_CARCINOMA_UP		39	0.38077	1.17735	0.201881	0.34269	1	2988	tags=33%, list=13%, signal=38%
GAVIN_FOXP3_TARGETS_CLUSTER_T4	GAVIN_FOXP3_TARGETS_CLUSTER_T4		89	0.327827	1.17708	0.157498	0.342897	1	3267	tags=30%, list=14%, signal=35%
WANG_CISPLATIN_RESPONSE_AND_XPC_UP	WANG_CISPLATIN_RESPONSE_AND_XPC_UP		183	0.29642	1.1764	0.109073	0.343892	1	3284	tags=25%, list=14%, signal=29%
PUJANA_BREAST_CANCER_LIT_INT_NETWORK	PUJANA_BREAST_CANCER_LIT_INT_NETWORK		96	0.322389	1.17587	0.144196	0.34461	1	2796	tags=19%, list=12%, signal=21%
WANG_CLIM2_TARGETS_DN	WANG_CLIM2_TARGETS_DN		161	0.299502	1.17585	0.109653	0.344362	1	5945	tags=42%, list=25%, signal=55%
POS_HISTAMINE_RESPONSE_NETWORK	POS_HISTAMINE_RESPONSE_NETWORK		32	0.396298	1.17574	0.217134	0.344271	1	2350	tags=19%, list=10%, signal=21%
VANOEVELEN_MYOGENESIS_SIN3A_TARGETS	VANOEVELEN_MYOGENESIS_SIN3A_TARGETS		202	0.291161	1.17479	0.0960615	0.345806	1	3990	tags=27%, list=17%, signal=33%
REACTOME_TRAF6_MEDIATED_INDUCTION_OF_NFKB_AND_MAP_KINASES_UPON_TLR7_8_OR_9_ACTIVATION	REACTOME_TRAF6_MEDIATED_INDUCTION_OF_NFKB_AND_MAP_KINASES_UPON_TLR7_8_OR_9_ACTIVATION		73	0.337108	1.17473	0.167294	0.345644	1	2204	tags=16%, list=9%, signal=18%
KYNG_DNA_DAMAGE_BY_4NQO_OR_UV	KYNG_DNA_DAMAGE_BY_4NQO_OR_UV		59	0.348326	1.17436	0.184867	0.346039	1	3133	tags=27%, list=13%, signal=31%
WANG_PROSTATE_CANCER_ANDROGEN_INDEPENDENT	WANG_PROSTATE_CANCER_ANDROGEN_INDEPENDENT		55	0.356654	1.17395	0.180577	0.346513	1	3590	tags=33%, list=15%, signal=39%
HEIDENBLAD_AMPLICON_12P11_12_UP	HEIDENBLAD_AMPLICON_12P11_12_UP		32	0.396867	1.17382	0.214647	0.346501	1	1874	tags=25%, list=8%, signal=27%
BIOCARTA_MITOCHONDRIA_PATHWAY	BIOCARTA_MITOCHONDRIA_PATHWAY		21	0.439084	1.17326	0.23927	0.347258	1	4763	tags=48%, list=20%, signal=60%
SHIN_B_CELL_LYMPHOMA_CLUSTER_3	SHIN_B_CELL_LYMPHOMA_CLUSTER_3		28	0.408573	1.17318	0.223476	0.347134	1	2635	tags=25%, list=11%, signal=28%
IIZUKA_LIVER_CANCER_PROGRESSION_G2_G3_UP	IIZUKA_LIVER_CANCER_PROGRESSION_G2_G3_UP		26	0.415412	1.17209	0.233241	0.348903	1	1229	tags=19%, list=5%, signal=20%
IVANOVA_HEMATOPOIESIS_EARLY_PROGENITOR	IVANOVA_HEMATOPOIESIS_EARLY_PROGENITOR		472	0.268235	1.17202	0.0445333	0.348751	1	5165	tags=32%, list=22%, signal=41%
SWEET_KRAS_TARGETS_DN	SWEET_KRAS_TARGETS_DN		57	0.351285	1.17156	0.186135	0.349353	1	3523	tags=26%, list=15%, signal=31%
TURASHVILI_BREAST_LOBULAR_CARCINOMA_VS_DUCTAL_NORMAL_UP	TURASHVILI_BREAST_LOBULAR_CARCINOMA_VS_DUCTAL_NORMAL_UP		63	0.342893	1.17142	0.175993	0.349329	1	4761	tags=40%, list=20%, signal=50%
HOFMANN_MYELODYSPLASTIC_SYNDROM_RISK_DN	HOFMANN_MYELODYSPLASTIC_SYNDROM_RISK_DN		19	0.444542	1.17141	0.238095	0.349058	1	2394	tags=26%, list=10%, signal=29%
WEINMANN_ADAPTATION_TO_HYPOXIA_UP	WEINMANN_ADAPTATION_TO_HYPOXIA_UP		28	0.408269	1.17139	0.222438	0.348801	1	2523	tags=32%, list=11%, signal=36%
REACTOME_PROCESSIVE_SYNTHESIS_ON_THE_LAGGING_STRAND	REACTOME_PROCESSIVE_SYNTHESIS_ON_THE_LAGGING_STRAND		15	0.475233	1.17016	0.244898	0.35083	1	3619	tags=40%, list=15%, signal=47%
ST_GA13_PATHWAY	ST_GA13_PATHWAY		34	0.390988	1.16978	0.215434	0.351296	1	2416	tags=26%, list=10%, signal=29%
LINDSTEDT_DENDRITIC_CELL_MATURATION_C	LINDSTEDT_DENDRITIC_CELL_MATURATION_C		62	0.346848	1.16975	0.186134	0.35106	1	4628	tags=35%, list=20%, signal=44%
LIAN_LIPA_TARGETS_6M	LIAN_LIPA_TARGETS_6M		69	0.340207	1.16965	0.171207	0.350958	1	1108	tags=20%, list=5%, signal=21%
MARKEY_RB1_CHRONIC_LOF_UP	MARKEY_RB1_CHRONIC_LOF_UP		111	0.315755	1.16954	0.154242	0.350879	1	3926	tags=29%, list=17%, signal=34%
MCCLUNG_CREB1_TARGETS_UP	MCCLUNG_CREB1_TARGETS_UP		96	0.321562	1.16942	0.16098	0.350846	1	3628	tags=26%, list=15%, signal=31%
AMIT_EGF_RESPONSE_240_HELA	AMIT_EGF_RESPONSE_240_HELA		60	0.347754	1.16916	0.188254	0.351052	1	4012	tags=30%, list=17%, signal=36%
LANDIS_ERBB2_BREAST_PRENEOPLASTIC_DN	LANDIS_ERBB2_BREAST_PRENEOPLASTIC_DN		51	0.359288	1.16884	0.192638	0.351371	1	3055	tags=27%, list=13%, signal=32%
GUILLAUMOND_KLF10_TARGETS_DN	GUILLAUMOND_KLF10_TARGETS_DN		28	0.406528	1.16879	0.223601	0.351175	1	4442	tags=61%, list=19%, signal=75%
NIELSEN_LEIOMYOSARCOMA_DN	NIELSEN_LEIOMYOSARCOMA_DN		16	0.468164	1.16834	0.2531	0.351747	1	372	tags=19%, list=2%, signal=19%
PID_KIT_PATHWAY	PID_KIT_PATHWAY		49	0.361746	1.16805	0.204605	0.352032	1	4767	tags=37%, list=20%, signal=46%
KEGG_INSULIN_SIGNALING_PATHWAY	KEGG_INSULIN_SIGNALING_PATHWAY		132	0.30672	1.16775	0.133318	0.352333	1	3514	tags=26%, list=15%, signal=30%
BIOCARTA_MCM_PATHWAY	BIOCARTA_MCM_PATHWAY		17	0.460139	1.16688	0.257802	0.353728	1	4539	tags=53%, list=19%, signal=66%
KEGG_PRIMARY_IMMUNODEFICIENCY	KEGG_PRIMARY_IMMUNODEFICIENCY		34	0.389488	1.16652	0.225144	0.354133	1	1022	tags=21%, list=4%, signal=21%
NAKAMURA_ADIPOGENESIS_LATE_UP	NAKAMURA_ADIPOGENESIS_LATE_UP		95	0.320619	1.16629	0.163823	0.354267	1	3573	tags=23%, list=15%, signal=27%
PID_AURORA_A_PATHWAY	PID_AURORA_A_PATHWAY		29	0.404541	1.16572	0.223938	0.355093	1	4997	tags=45%, list=21%, signal=57%
DING_LUNG_CANCER_EXPRESSION_BY_COPY_NUMBER	DING_LUNG_CANCER_EXPRESSION_BY_COPY_NUMBER		95	0.32202	1.1652	0.165479	0.355829	1	3743	tags=29%, list=16%, signal=35%
MULLIGHAN_NPM1_MUTATED_SIGNATURE_1_DN	MULLIGHAN_NPM1_MUTATED_SIGNATURE_1_DN		115	0.311935	1.16502	0.151259	0.355895	1	3332	tags=30%, list=14%, signal=34%
GINESTIER_BREAST_CANCER_20Q13_AMPLIFICATION_UP	GINESTIER_BREAST_CANCER_20Q13_AMPLIFICATION_UP		103	0.316348	1.16485	0.150871	0.35593	1	4356	tags=34%, list=19%, signal=42%
RODWELL_AGING_KIDNEY_UP	RODWELL_AGING_KIDNEY_UP		409	0.26874	1.16444	0.0557563	0.356435	1	3728	tags=27%, list=16%, signal=32%
TONKS_TARGETS_OF_RUNX1_RUNX1T1_FUSION_ERYTHROCYTE_UP	TONKS_TARGETS_OF_RUNX1_RUNX1T1_FUSION_ERYTHROCYTE_UP		138	0.305415	1.16442	0.136577	0.35619	1	3236	tags=24%, list=14%, signal=28%
FERNANDEZ_BOUND_BY_MYC	FERNANDEZ_BOUND_BY_MYC		173	0.295288	1.16438	0.113675	0.35598	1	3108	tags=25%, list=13%, signal=28%
SMID_BREAST_CANCER_LUMINAL_B_UP	SMID_BREAST_CANCER_LUMINAL_B_UP		152	0.299919	1.16395	0.129316	0.356541	1	5561	tags=37%, list=24%, signal=48%
BIOCARTA_FMLP_PATHWAY	BIOCARTA_FMLP_PATHWAY		34	0.387531	1.16338	0.22468	0.357361	1	2448	tags=24%, list=10%, signal=26%
LINDVALL_IMMORTALIZED_BY_TERT_UP	LINDVALL_IMMORTALIZED_BY_TERT_UP		72	0.334212	1.16308	0.185606	0.357671	1	1590	tags=15%, list=7%, signal=16%
TRACEY_RESISTANCE_TO_IFNA2_DN	TRACEY_RESISTANCE_TO_IFNA2_DN		27	0.41038	1.16292	0.240915	0.357683	1	2236	tags=26%, list=10%, signal=29%
DAVICIONI_TARGETS_OF_PAX_FOXO1_FUSIONS_UP	DAVICIONI_TARGETS_OF_PAX_FOXO1_FUSIONS_UP		237	0.284329	1.16245	0.10344	0.358308	1	3284	tags=22%, list=14%, signal=25%
RAMALHO_STEMNESS_UP	RAMALHO_STEMNESS_UP		193	0.290923	1.16215	0.113071	0.35861	1	5003	tags=34%, list=21%, signal=42%
DARWICHE_PAPILLOMA_RISK_LOW_UP	DARWICHE_PAPILLOMA_RISK_LOW_UP		140	0.302657	1.1614	0.141356	0.359777	1	3677	tags=27%, list=16%, signal=32%
KAUFFMANN_DNA_REPAIR_GENES	KAUFFMANN_DNA_REPAIR_GENES		216	0.286453	1.16137	0.11066	0.359546	1	3537	tags=25%, list=15%, signal=30%
KEGG_CELL_CYCLE	KEGG_CELL_CYCLE		121	0.308549	1.16067	0.148182	0.360631	1	3901	tags=27%, list=17%, signal=33%
KANG_FLUOROURACIL_RESISTANCE_UP	KANG_FLUOROURACIL_RESISTANCE_UP		21	0.430027	1.16009	0.2427	0.361454	1	1106	tags=14%, list=5%, signal=15%
GAZDA_DIAMOND_BLACKFAN_ANEMIA_PROGENITOR_UP	GAZDA_DIAMOND_BLACKFAN_ANEMIA_PROGENITOR_UP		33	0.390306	1.16005	0.229922	0.361227	1	4271	tags=39%, list=18%, signal=48%
TAKEDA_TARGETS_OF_NUP98_HOXA9_FUSION_6HR_UP	TAKEDA_TARGETS_OF_NUP98_HOXA9_FUSION_6HR_UP		74	0.331346	1.15998	0.182386	0.361087	1	2133	tags=22%, list=9%, signal=24%
REACTOME_CREB_PHOSPHORYLATION_THROUGH_THE_ACTIVATION_OF_RAS	REACTOME_CREB_PHOSPHORYLATION_THROUGH_THE_ACTIVATION_OF_RAS		26	0.412553	1.15977	0.236734	0.361211	1	3311	tags=27%, list=14%, signal=31%
MA_MYELOID_DIFFERENTIATION_UP	MA_MYELOID_DIFFERENTIATION_UP		38	0.377399	1.15961	0.221352	0.361236	1	4417	tags=39%, list=19%, signal=49%
DELYS_THYROID_CANCER_UP	DELYS_THYROID_CANCER_UP		416	0.268334	1.15839	0.0673981	0.363389	1	3356	tags=24%, list=14%, signal=28%
BIOCARTA_IGF1_PATHWAY	BIOCARTA_IGF1_PATHWAY		20	0.436193	1.15831	0.250956	0.363257	1	1239	tags=20%, list=5%, signal=21%
DELACROIX_RAR_TARGETS_DN	DELACROIX_RAR_TARGETS_DN		23	0.42268	1.15693	0.252545	0.365677	1	8	tags=9%, list=0%, signal=9%
GAUSSMANN_MLL_AF4_FUSION_TARGETS_C_DN	GAUSSMANN_MLL_AF4_FUSION_TARGETS_C_DN		19	0.443213	1.15661	0.253439	0.366019	1	677	tags=21%, list=3%, signal=22%
PID_CASPASE_PATHWAY	PID_CASPASE_PATHWAY		50	0.357928	1.15651	0.209358	0.36591	1	4763	tags=40%, list=20%, signal=50%
DURCHDEWALD_SKIN_CARCINOGENESIS_UP	DURCHDEWALD_SKIN_CARCINOGENESIS_UP		80	0.326291	1.15627	0.185335	0.366093	1	3217	tags=26%, list=14%, signal=30%
AMUNDSON_POOR_SURVIVAL_AFTER_GAMMA_RADIATION_2G	AMUNDSON_POOR_SURVIVAL_AFTER_GAMMA_RADIATION_2G		157	0.295742	1.15611	0.141777	0.366129	1	3120	tags=24%, list=13%, signal=28%
LANDIS_ERBB2_BREAST_TUMORS_65_DN	LANDIS_ERBB2_BREAST_TUMORS_65_DN		35	0.380807	1.15508	0.224085	0.367861	1	5835	tags=46%, list=25%, signal=61%
SA_CASPASE_CASCADE	SA_CASPASE_CASCADE		17	0.45646	1.155	0.265263	0.367739	1	4465	tags=41%, list=19%, signal=51%
XU_GH1_EXOGENOUS_TARGETS_DN	XU_GH1_EXOGENOUS_TARGETS_DN		97	0.317228	1.1547	0.174033	0.368043	1	1651	tags=21%, list=7%, signal=22%
KEGG_GLYCOSAMINOGLYCAN_DEGRADATION	KEGG_GLYCOSAMINOGLYCAN_DEGRADATION		21	0.431698	1.15444	0.25951	0.368263	1	4571	tags=43%, list=20%, signal=53%
SIMBULAN_PARP1_TARGETS_UP	SIMBULAN_PARP1_TARGETS_UP		31	0.390437	1.15432	0.240313	0.368218	1	4272	tags=32%, list=18%, signal=39%
YANG_BREAST_CANCER_ESR1_LASER_DN	YANG_BREAST_CANCER_ESR1_LASER_DN		47	0.359849	1.15424	0.211298	0.368078	1	3999	tags=34%, list=17%, signal=41%
ZHANG_TLX_TARGETS_UP	ZHANG_TLX_TARGETS_UP		104	0.314476	1.15406	0.169171	0.368162	1	4370	tags=36%, list=19%, signal=44%
SCHLOSSER_MYC_AND_SERUM_RESPONSE_SYNERGY	SCHLOSSER_MYC_AND_SERUM_RESPONSE_SYNERGY		30	0.395726	1.15386	0.232166	0.368267	1	4993	tags=47%, list=21%, signal=59%
SHEPARD_BMYB_MORPHOLINO_UP	SHEPARD_BMYB_MORPHOLINO_UP		192	0.289481	1.15385	0.126543	0.368004	1	4562	tags=32%, list=19%, signal=40%
LI_WILMS_TUMOR_VS_FETAL_KIDNEY_2_DN	LI_WILMS_TUMOR_VS_FETAL_KIDNEY_2_DN		51	0.354399	1.15379	0.213579	0.367821	1	863	tags=14%, list=4%, signal=14%
WANG_NFKB_TARGETS	WANG_NFKB_TARGETS		24	0.416474	1.15372	0.248776	0.367677	1	132	tags=13%, list=1%, signal=13%
XU_HGF_TARGETS_INDUCED_BY_AKT1_6HR	XU_HGF_TARGETS_INDUCED_BY_AKT1_6HR		17	0.451724	1.15304	0.259665	0.368742	1	11	tags=6%, list=0%, signal=6%
KEGG_VASOPRESSIN_REGULATED_WATER_REABSORPTION	KEGG_VASOPRESSIN_REGULATED_WATER_REABSORPTION		42	0.364931	1.1511	0.225757	0.372376	1	5013	tags=33%, list=21%, signal=42%
REACTOME_TRAFFICKING_OF_GLUR2_CONTAINING_AMPA_RECEPTORS	REACTOME_TRAFFICKING_OF_GLUR2_CONTAINING_AMPA_RECEPTORS		15	0.469141	1.15058	0.271587	0.373127	1	1599	tags=33%, list=7%, signal=36%
MAHADEVAN_GIST_MORPHOLOGICAL_SWITCH	MAHADEVAN_GIST_MORPHOLOGICAL_SWITCH		15	0.466339	1.15034	0.275636	0.37333	1	1039	tags=27%, list=4%, signal=28%
ZHANG_TLX_TARGETS_36HR_UP	ZHANG_TLX_TARGETS_36HR_UP		210	0.284808	1.15002	0.124145	0.373666	1	4025	tags=29%, list=17%, signal=35%
REACTOME_INTRINSIC_PATHWAY_FOR_APOPTOSIS	REACTOME_INTRINSIC_PATHWAY_FOR_APOPTOSIS		28	0.400267	1.14974	0.243955	0.373951	1	4763	tags=39%, list=20%, signal=49%
BIOCARTA_CARDIACEGF_PATHWAY	BIOCARTA_CARDIACEGF_PATHWAY		16	0.460106	1.1495	0.271896	0.374133	1	948	tags=25%, list=4%, signal=26%
TURASHVILI_BREAST_LOBULAR_CARCINOMA_VS_LOBULAR_NORMAL_UP	TURASHVILI_BREAST_LOBULAR_CARCINOMA_VS_LOBULAR_NORMAL_UP		87	0.319855	1.14932	0.195111	0.374193	1	1471	tags=17%, list=6%, signal=18%
KEGG_LONG_TERM_POTENTIATION	KEGG_LONG_TERM_POTENTIATION		65	0.337154	1.14914	0.202458	0.374265	1	3642	tags=29%, list=16%, signal=35%
CHEN_PDGF_TARGETS	CHEN_PDGF_TARGETS		18	0.443998	1.14872	0.264385	0.374827	1	1143	tags=28%, list=5%, signal=29%
SESTO_RESPONSE_TO_UV_C8	SESTO_RESPONSE_TO_UV_C8		68	0.334346	1.14859	0.198067	0.374802	1	3849	tags=34%, list=16%, signal=40%
PID_ALPHA_SYNUCLEIN_PATHWAY	PID_ALPHA_SYNUCLEIN_PATHWAY		33	0.385481	1.14849	0.236958	0.374705	1	1057	tags=21%, list=5%, signal=22%
PUIFFE_INVASION_INHIBITED_BY_ASCITES_DN	PUIFFE_INVASION_INHIBITED_BY_ASCITES_DN		133	0.301163	1.14755	0.15751	0.376323	1	3802	tags=26%, list=16%, signal=30%
REACTOME_COSTIMULATION_BY_THE_CD28_FAMILY	REACTOME_COSTIMULATION_BY_THE_CD28_FAMILY		54	0.347284	1.14689	0.219232	0.377362	1	5003	tags=41%, list=21%, signal=52%
RUTELLA_RESPONSE_TO_HGF_VS_CSF2RB_AND_IL4_DN	RUTELLA_RESPONSE_TO_HGF_VS_CSF2RB_AND_IL4_DN		219	0.281727	1.14568	0.12464	0.379523	1	3137	tags=24%, list=13%, signal=27%
MCBRYAN_PUBERTAL_BREAST_4_5WK_DN	MCBRYAN_PUBERTAL_BREAST_4_5WK_DN		178	0.289364	1.14552	0.135897	0.379543	1	2131	tags=20%, list=9%, signal=21%
KAYO_CALORIE_RESTRICTION_MUSCLE_DN	KAYO_CALORIE_RESTRICTION_MUSCLE_DN		80	0.322727	1.14549	0.191143	0.379308	1	4531	tags=34%, list=19%, signal=42%
UDAYAKUMAR_MED1_TARGETS_DN	UDAYAKUMAR_MED1_TARGETS_DN		219	0.282762	1.14545	0.126791	0.379097	1	3926	tags=27%, list=17%, signal=32%
HOEBEKE_LYMPHOID_STEM_CELL_UP	HOEBEKE_LYMPHOID_STEM_CELL_UP		84	0.321069	1.14393	0.196478	0.381893	1	1215	tags=12%, list=5%, signal=13%
GROSS_HYPOXIA_VIA_ELK3_AND_HIF1A_DN	GROSS_HYPOXIA_VIA_ELK3_AND_HIF1A_DN		101	0.311744	1.14343	0.177011	0.382609	1	4924	tags=35%, list=21%, signal=44%
KEGG_AMINOACYL_TRNA_BIOSYNTHESIS	KEGG_AMINOACYL_TRNA_BIOSYNTHESIS		41	0.367553	1.14323	0.231376	0.382727	1	4989	tags=41%, list=21%, signal=53%
CASORELLI_ACUTE_PROMYELOCYTIC_LEUKEMIA_UP	CASORELLI_ACUTE_PROMYELOCYTIC_LEUKEMIA_UP		149	0.294393	1.14321	0.150266	0.382473	1	1612	tags=19%, list=7%, signal=20%
GERHOLD_ADIPOGENESIS_DN	GERHOLD_ADIPOGENESIS_DN		58	0.341467	1.14316	0.211698	0.382264	1	3078	tags=29%, list=13%, signal=34%
MATTHEWS_SKIN_CARCINOGENESIS_VIA_JUN	MATTHEWS_SKIN_CARCINOGENESIS_VIA_JUN		15	0.462342	1.1429	0.283538	0.382509	1	3774	tags=40%, list=16%, signal=48%
RUAN_RESPONSE_TO_TNF_DN	RUAN_RESPONSE_TO_TNF_DN		81	0.322782	1.14242	0.197308	0.38322	1	3458	tags=28%, list=15%, signal=33%
AMIT_SERUM_RESPONSE_240_MCF10A	AMIT_SERUM_RESPONSE_240_MCF10A		56	0.343464	1.14207	0.219248	0.383639	1	1911	tags=20%, list=8%, signal=21%
REACTOME_NGF_SIGNALLING_VIA_TRKA_FROM_THE_PLASMA_MEMBRANE	REACTOME_NGF_SIGNALLING_VIA_TRKA_FROM_THE_PLASMA_MEMBRANE		131	0.301492	1.14145	0.166	0.384602	1	4659	tags=31%, list=20%, signal=38%
SENESE_HDAC1_AND_HDAC2_TARGETS_DN	SENESE_HDAC1_AND_HDAC2_TARGETS_DN		195	0.284406	1.1414	0.138556	0.384405	1	3265	tags=23%, list=14%, signal=26%
KEGG_MATURITY_ONSET_DIABETES_OF_THE_YOUNG	KEGG_MATURITY_ONSET_DIABETES_OF_THE_YOUNG		24	0.411036	1.14129	0.266026	0.38433	1	560	tags=8%, list=2%, signal=9%
GENTILE_UV_RESPONSE_CLUSTER_D1	GENTILE_UV_RESPONSE_CLUSTER_D1		16	0.456905	1.14118	0.282641	0.38428	1	2716	tags=31%, list=12%, signal=35%
GRAHAM_CML_DIVIDING_VS_NORMAL_QUIESCENT_DN	GRAHAM_CML_DIVIDING_VS_NORMAL_QUIESCENT_DN		80	0.321659	1.14116	0.192749	0.384006	1	2286	tags=20%, list=10%, signal=22%
BOYAULT_LIVER_CANCER_SUBCLASS_G6_DN	BOYAULT_LIVER_CANCER_SUBCLASS_G6_DN		19	0.436714	1.14113	0.270829	0.383774	1	1277	tags=21%, list=5%, signal=22%
REACTOME_SHC_RELATED_EVENTS	REACTOME_SHC_RELATED_EVENTS		15	0.462126	1.14031	0.280536	0.385163	1	2949	tags=27%, list=13%, signal=30%
IGARASHI_ATF4_TARGETS_DN	IGARASHI_ATF4_TARGETS_DN		82	0.321072	1.14014	0.198903	0.385226	1	4533	tags=34%, list=19%, signal=42%
PURBEY_TARGETS_OF_CTBP1_NOT_SATB1_DN	PURBEY_TARGETS_OF_CTBP1_NOT_SATB1_DN		384	0.265893	1.14012	0.0901065	0.384964	1	4193	tags=25%, list=18%, signal=30%
SATO_SILENCED_EPIGENETICALLY_IN_PANCREATIC_CANCER	SATO_SILENCED_EPIGENETICALLY_IN_PANCREATIC_CANCER		39	0.369483	1.14005	0.246164	0.384816	1	3496	tags=26%, list=15%, signal=30%
REACTOME_INTEGRIN_CELL_SURFACE_INTERACTIONS	REACTOME_INTEGRIN_CELL_SURFACE_INTERACTIONS		78	0.323549	1.1394	0.206668	0.385853	1	2511	tags=21%, list=11%, signal=23%
REACTOME_ADP_SIGNALLING_THROUGH_P2RY1	REACTOME_ADP_SIGNALLING_THROUGH_P2RY1		25	0.406884	1.13928	0.258301	0.385818	1	4294	tags=40%, list=18%, signal=49%
KEGG_GLUTATHIONE_METABOLISM	KEGG_GLUTATHIONE_METABOLISM		48	0.352926	1.13917	0.23295	0.385732	1	4370	tags=29%, list=19%, signal=36%
BROWNE_HCMV_INFECTION_14HR_DN	BROWNE_HCMV_INFECTION_14HR_DN		266	0.274387	1.13901	0.11054	0.385785	1	3709	tags=26%, list=16%, signal=30%
HERNANDEZ_ABERRANT_MITOSIS_BY_DOCETACEL_2NM_DN	HERNANDEZ_ABERRANT_MITOSIS_BY_DOCETACEL_2NM_DN		23	0.416324	1.139	0.270581	0.385512	1	4341	tags=43%, list=19%, signal=53%
BIOCARTA_INSULIN_PATHWAY	BIOCARTA_INSULIN_PATHWAY		20	0.429987	1.1387	0.274464	0.385831	1	1239	tags=20%, list=5%, signal=21%
JOHNSTONE_PARVB_TARGETS_1_DN	JOHNSTONE_PARVB_TARGETS_1_DN		52	0.347902	1.13848	0.227662	0.386001	1	1953	tags=23%, list=8%, signal=25%
JAZAG_TGFB1_SIGNALING_VIA_SMAD4_UP	JAZAG_TGFB1_SIGNALING_VIA_SMAD4_UP		100	0.309782	1.13773	0.19116	0.387268	1	3354	tags=27%, list=14%, signal=31%
BROWN_MYELOID_CELL_DEVELOPMENT_DN	BROWN_MYELOID_CELL_DEVELOPMENT_DN		117	0.303936	1.13766	0.185235	0.387101	1	3005	tags=29%, list=13%, signal=33%
WANG_IMMORTALIZED_BY_HOXA9_AND_MEIS1_DN	WANG_IMMORTALIZED_BY_HOXA9_AND_MEIS1_DN		24	0.410898	1.13725	0.263846	0.387661	1	450	tags=21%, list=2%, signal=21%
MAGRANGEAS_MULTIPLE_MYELOMA_IGLL_VS_IGLK_DN	MAGRANGEAS_MULTIPLE_MYELOMA_IGLL_VS_IGLK_DN		21	0.421931	1.13667	0.272123	0.388545	1	296	tags=14%, list=1%, signal=14%
WALLACE_JAK2_TARGETS_UP	WALLACE_JAK2_TARGETS_UP		24	0.412517	1.13647	0.27385	0.38867	1	4683	tags=46%, list=20%, signal=57%
PID_MYC_REPRESS_PATHWAY	PID_MYC_REPRESS_PATHWAY		61	0.33673	1.13632	0.228113	0.388677	1	2361	tags=15%, list=10%, signal=16%
SENESE_HDAC2_TARGETS_DN	SENESE_HDAC2_TARGETS_DN		113	0.304398	1.13572	0.183995	0.389637	1	2903	tags=19%, list=12%, signal=22%
RAO_BOUND_BY_SALL4_ISOFORM_B	RAO_BOUND_BY_SALL4_ISOFORM_B		470	0.260001	1.13503	0.0724484	0.390783	1	5161	tags=31%, list=22%, signal=39%
STEARMAN_LUNG_CANCER_EARLY_VS_LATE_DN	STEARMAN_LUNG_CANCER_EARLY_VS_LATE_DN		58	0.337336	1.1342	0.239726	0.392232	1	4371	tags=41%, list=19%, signal=51%
COLDREN_GEFITINIB_RESISTANCE_DN	COLDREN_GEFITINIB_RESISTANCE_DN		203	0.281365	1.134	0.14507	0.392353	1	3337	tags=22%, list=14%, signal=25%
KYNG_RESPONSE_TO_H2O2_VIA_ERCC6_DN	KYNG_RESPONSE_TO_H2O2_VIA_ERCC6_DN		41	0.362782	1.13398	0.252594	0.392085	1	5182	tags=49%, list=22%, signal=63%
SERVITJA_ISLET_HNF1A_TARGETS_UP	SERVITJA_ISLET_HNF1A_TARGETS_UP		155	0.290479	1.13384	0.163067	0.392091	1	3327	tags=26%, list=14%, signal=30%
CHARAFE_BREAST_CANCER_LUMINAL_VS_MESENCHYMAL_UP	CHARAFE_BREAST_CANCER_LUMINAL_VS_MESENCHYMAL_UP		393	0.263943	1.13383	0.0927971	0.391816	1	4767	tags=28%, list=20%, signal=35%
CUI_TCF21_TARGETS_DN	CUI_TCF21_TARGETS_DN		28	0.394352	1.13353	0.26303	0.392154	1	2555	tags=32%, list=11%, signal=36%
NIKOLSKY_BREAST_CANCER_16P13_AMPLICON	NIKOLSKY_BREAST_CANCER_16P13_AMPLICON		100	0.309546	1.13352	0.198651	0.391875	1	4998	tags=33%, list=21%, signal=42%
ROSS_AML_WITH_AML1_ETO_FUSION	ROSS_AML_WITH_AML1_ETO_FUSION		68	0.330022	1.1333	0.222615	0.392027	1	1255	tags=13%, list=5%, signal=14%
WIERENGA_STAT5A_TARGETS_DN	WIERENGA_STAT5A_TARGETS_DN		180	0.285379	1.13322	0.157819	0.391897	1	1553	tags=14%, list=7%, signal=15%
GUENTHER_GROWTH_SPHERICAL_VS_ADHERENT_UP	GUENTHER_GROWTH_SPHERICAL_VS_ADHERENT_UP		21	0.422742	1.13307	0.275532	0.391893	1	1140	tags=14%, list=5%, signal=15%
YU_BAP1_TARGETS	YU_BAP1_TARGETS		27	0.3981	1.13255	0.267815	0.392681	1	3483	tags=30%, list=15%, signal=35%
HUPER_BREAST_BASAL_VS_LUMINAL_UP	HUPER_BREAST_BASAL_VS_LUMINAL_UP		45	0.355773	1.13251	0.237541	0.392465	1	3379	tags=22%, list=14%, signal=26%
REACTOME_MITOTIC_G2_G2_M_PHASES	REACTOME_MITOTIC_G2_G2_M_PHASES		75	0.323759	1.1325	0.217853	0.392195	1	4462	tags=32%, list=19%, signal=39%
LEE_METASTASIS_AND_ALTERNATIVE_SPLICING_DN	LEE_METASTASIS_AND_ALTERNATIVE_SPLICING_DN		44	0.356859	1.13232	0.25	0.392277	1	3317	tags=25%, list=14%, signal=29%
REACTOME_INSULIN_RECEPTOR_RECYCLING	REACTOME_INSULIN_RECEPTOR_RECYCLING		21	0.421435	1.13224	0.277355	0.392158	1	3910	tags=33%, list=17%, signal=40%
KANG_IMMORTALIZED_BY_TERT_UP	KANG_IMMORTALIZED_BY_TERT_UP		82	0.319394	1.13213	0.214222	0.392095	1	2814	tags=22%, list=12%, signal=25%
PID_ERA_GENOMIC_PATHWAY	PID_ERA_GENOMIC_PATHWAY		64	0.331968	1.13129	0.227131	0.393555	1	2409	tags=25%, list=10%, signal=28%
ZHAN_V1_LATE_DIFFERENTIATION_GENES_DN	ZHAN_V1_LATE_DIFFERENTIATION_GENES_DN		15	0.458162	1.13107	0.293659	0.393704	1	5403	tags=60%, list=23%, signal=78%
DARWICHE_SKIN_TUMOR_PROMOTER_UP	DARWICHE_SKIN_TUMOR_PROMOTER_UP		125	0.299907	1.13093	0.189993	0.393704	1	3379	tags=23%, list=14%, signal=27%
XU_HGF_SIGNALING_NOT_VIA_AKT1_6HR	XU_HGF_SIGNALING_NOT_VIA_AKT1_6HR		26	0.400715	1.13059	0.273268	0.394124	1	2451	tags=27%, list=10%, signal=30%
GARY_CD5_TARGETS_UP	GARY_CD5_TARGETS_UP		431	0.260557	1.13046	0.0963824	0.39411	1	3823	tags=26%, list=16%, signal=30%
BIOCARTA_CELLCYCLE_PATHWAY	BIOCARTA_CELLCYCLE_PATHWAY		23	0.411208	1.12881	0.27666	0.397232	1	344	tags=9%, list=1%, signal=9%
MORI_PLASMA_CELL_DN	MORI_PLASMA_CELL_DN		28	0.392476	1.12837	0.268843	0.397851	1	4195	tags=39%, list=18%, signal=48%
GAUSSMANN_MLL_AF4_FUSION_TARGETS_F_DN	GAUSSMANN_MLL_AF4_FUSION_TARGETS_F_DN		31	0.383999	1.12814	0.264068	0.398035	1	2951	tags=29%, list=13%, signal=33%
WANG_RECURRENT_LIVER_CANCER_DN	WANG_RECURRENT_LIVER_CANCER_DN		16	0.450686	1.12774	0.292242	0.398595	1	2839	tags=44%, list=12%, signal=50%
HAN_SATB1_TARGETS_DN	HAN_SATB1_TARGETS_DN		391	0.261814	1.12724	0.0989637	0.399341	1	4032	tags=24%, list=17%, signal=28%
STEIN_ESRRA_TARGETS_RESPONSIVE_TO_ESTROGEN_DN	STEIN_ESRRA_TARGETS_RESPONSIVE_TO_ESTROGEN_DN		39	0.365803	1.12695	0.258449	0.399652	1	4860	tags=38%, list=21%, signal=48%
AMBROSINI_FLAVOPIRIDOL_TREATMENT_TP53	AMBROSINI_FLAVOPIRIDOL_TREATMENT_TP53		96	0.310645	1.12685	0.202823	0.399569	1	5116	tags=35%, list=22%, signal=45%
CHANDRAN_METASTASIS_TOP50_UP	CHANDRAN_METASTASIS_TOP50_UP		33	0.377958	1.12673	0.268041	0.399519	1	2405	tags=24%, list=10%, signal=27%
BIOCARTA_IGF1MTOR_PATHWAY	BIOCARTA_IGF1MTOR_PATHWAY		19	0.431645	1.1261	0.287099	0.400574	1	4238	tags=37%, list=18%, signal=45%
CHICAS_RB1_TARGETS_GROWING	CHICAS_RB1_TARGETS_GROWING		219	0.276953	1.12604	0.150404	0.400415	1	4122	tags=29%, list=18%, signal=35%
BIOCARTA_IGF1R_PATHWAY	BIOCARTA_IGF1R_PATHWAY		21	0.419068	1.12574	0.287452	0.400751	1	4238	tags=33%, list=18%, signal=41%
KINSEY_TARGETS_OF_EWSR1_FLII_FUSION_DN	KINSEY_TARGETS_OF_EWSR1_FLII_FUSION_DN		291	0.27054	1.12568	0.13699	0.400576	1	3039	tags=20%, list=13%, signal=23%
LINDGREN_BLADDER_CANCER_CLUSTER_1_UP	LINDGREN_BLADDER_CANCER_CLUSTER_1_UP		99	0.307553	1.12499	0.207495	0.401733	1	5023	tags=38%, list=21%, signal=49%
SCHAEFFER_PROSTATE_DEVELOPMENT_12HR_DN	SCHAEFFER_PROSTATE_DEVELOPMENT_12HR_DN		54	0.341458	1.1248	0.246762	0.401837	1	4092	tags=30%, list=17%, signal=36%
DELACROIX_RARG_BOUND_MEF	DELACROIX_RARG_BOUND_MEF		345	0.263752	1.12332	0.119548	0.404661	1	4126	tags=26%, list=18%, signal=31%
GOTZMANN_EPITHELIAL_TO_MESENCHYMAL_TRANSITION_UP	GOTZMANN_EPITHELIAL_TO_MESENCHYMAL_TRANSITION_UP		66	0.328232	1.12221	0.23665	0.406745	1	3301	tags=24%, list=14%, signal=28%
HAHTOLA_MYCOSIS_FUNGOIDES_UP	HAHTOLA_MYCOSIS_FUNGOIDES_UP		15	0.456127	1.12182	0.295787	0.407288	1	3358	tags=40%, list=14%, signal=47%
REACTOME_PLATELET_ACTIVATION_SIGNALING_AND_AGGREGATION	REACTOME_PLATELET_ACTIVATION_SIGNALING_AND_AGGREGATION		193	0.280063	1.12177	0.170526	0.407086	1	3476	tags=25%, list=15%, signal=29%
KEGG_VASCULAR_SMOOTH_MUSCLE_CONTRACTION	KEGG_VASCULAR_SMOOTH_MUSCLE_CONTRACTION		108	0.302601	1.12159	0.210611	0.407174	1	1644	tags=14%, list=7%, signal=15%
DACOSTA_LOW_DOSE_UV_RESPONSE_VIA_ERCC3_XPCS_UP	DACOSTA_LOW_DOSE_UV_RESPONSE_VIA_ERCC3_XPCS_UP		16	0.448122	1.12094	0.29903	0.408242	1	5015	tags=44%, list=21%, signal=56%
REACTOME_TRANSFERRIN_ENDOCYTOSIS_AND_RECYCLING	REACTOME_TRANSFERRIN_ENDOCYTOSIS_AND_RECYCLING		23	0.408921	1.12086	0.286628	0.408112	1	3910	tags=30%, list=17%, signal=36%
PID_HIF2PATHWAY	PID_HIF2PATHWAY		34	0.375055	1.12072	0.272806	0.408133	1	5082	tags=44%, list=22%, signal=56%
VANTVEER_BREAST_CANCER_POOR_PROGNOSIS	VANTVEER_BREAST_CANCER_POOR_PROGNOSIS		47	0.348127	1.12017	0.258495	0.408999	1	1723	tags=19%, list=7%, signal=21%
THILLAINADESAN_ZNF217_TARGETS_UP	THILLAINADESAN_ZNF217_TARGETS_UP		42	0.357549	1.11938	0.26712	0.410388	1	2389	tags=21%, list=10%, signal=24%
ZHAN_MULTIPLE_MYELOMA_SPIKED	ZHAN_MULTIPLE_MYELOMA_SPIKED		20	0.420113	1.11937	0.288752	0.410118	1	4	tags=5%, list=0%, signal=5%
QI_PLASMACYTOMA_UP	QI_PLASMACYTOMA_UP		249	0.271129	1.11855	0.14511	0.411549	1	3149	tags=25%, list=13%, signal=28%
REACTOME_RECRUITMENT_OF_MITOTIC_CENTROSOME_PROTEINS_AND_COMPLEXES	REACTOME_RECRUITMENT_OF_MITOTIC_CENTROSOME_PROTEINS_AND_COMPLEXES		60	0.33036	1.11777	0.240115	0.412937	1	5007	tags=35%, list=21%, signal=44%
CHIANG_LIVER_CANCER_SUBCLASS_UNANNOTATED_UP	CHIANG_LIVER_CANCER_SUBCLASS_UNANNOTATED_UP		71	0.323209	1.11752	0.237032	0.413173	1	3597	tags=27%, list=15%, signal=32%
TRAYNOR_RETT_SYNDROM_DN	TRAYNOR_RETT_SYNDROM_DN		17	0.436248	1.11751	0.299979	0.412878	1	2424	tags=35%, list=10%, signal=39%
FISCHER_G1_S_CELL_CYCLE	FISCHER_G1_S_CELL_CYCLE		185	0.280543	1.11719	0.177682	0.413268	1	3924	tags=25%, list=17%, signal=30%
HAMAI_APOPTOSIS_VIA_TRAIL_DN	HAMAI_APOPTOSIS_VIA_TRAIL_DN		166	0.284261	1.11704	0.187267	0.41329	1	3131	tags=22%, list=13%, signal=25%
REACTOME_SYNTHESIS_OF_BILE_ACIDS_AND_BILE_SALTS	REACTOME_SYNTHESIS_OF_BILE_ACIDS_AND_BILE_SALTS		18	0.433025	1.11684	0.302459	0.413426	1	1651	tags=28%, list=7%, signal=30%
ZHAN_MULTIPLE_MYELOMA_MS_DN	ZHAN_MULTIPLE_MYELOMA_MS_DN		34	0.372546	1.11655	0.283406	0.413744	1	3074	tags=29%, list=13%, signal=34%
MOREAUX_MULTIPLE_MYELOMA_BY_TACI_UP	MOREAUX_MULTIPLE_MYELOMA_BY_TACI_UP		352	0.261456	1.11646	0.131285	0.413633	1	4065	tags=25%, list=17%, signal=30%
WOOD_EBV_EBNA1_TARGETS_UP	WOOD_EBV_EBNA1_TARGETS_UP		103	0.303299	1.11621	0.211845	0.413871	1	2802	tags=20%, list=12%, signal=23%
STONER_ESOPHAGEAL_CARCINOGENESIS_UP	STONER_ESOPHAGEAL_CARCINOGENESIS_UP		34	0.370972	1.11577	0.270897	0.41451	1	2499	tags=24%, list=11%, signal=26%
STEIN_ESRRA_TARGETS_DN	STEIN_ESRRA_TARGETS_DN		89	0.309575	1.11558	0.225607	0.414608	1	3901	tags=25%, list=17%, signal=30%
PECE_MAMMARY_STEM_CELL_DN	PECE_MAMMARY_STEM_CELL_DN		124	0.295291	1.11519	0.213644	0.415162	1	2782	tags=23%, list=12%, signal=25%
BOYAULT_LIVER_CANCER_SUBCLASS_G1_UP	BOYAULT_LIVER_CANCER_SUBCLASS_G1_UP		102	0.303807	1.11493	0.217762	0.415401	1	3055	tags=25%, list=13%, signal=29%
GENTILE_UV_HIGH_DOSE_DN	GENTILE_UV_HIGH_DOSE_DN		288	0.266864	1.11453	0.15179	0.415977	1	3837	tags=24%, list=16%, signal=28%
YAMASHITA_LIVER_CANCER_STEM_CELL_UP	YAMASHITA_LIVER_CANCER_STEM_CELL_UP		47	0.348603	1.11414	0.263135	0.41652	1	1765	tags=19%, list=8%, signal=21%
GRYDER_PAX3FOXO1_ENHANCERS_KO_DOWN	GRYDER_PAX3FOXO1_ENHANCERS_KO_DOWN		404	0.258837	1.114	0.118967	0.416534	1	3860	tags=26%, list=16%, signal=31%
SENESE_HDAC3_TARGETS_DN	SENESE_HDAC3_TARGETS_DN		466	0.255694	1.11392	0.111407	0.416404	1	3567	tags=24%, list=15%, signal=27%
PEART_HDAC_PROLIFERATION_CLUSTER_UP	PEART_HDAC_PROLIFERATION_CLUSTER_UP		55	0.336332	1.11349	0.259512	0.41704	1	4092	tags=35%, list=17%, signal=42%
TAKEDA_TARGETS_OF_NUP98_HOXA9_FUSION_6HR_DN	TAKEDA_TARGETS_OF_NUP98_HOXA9_FUSION_6HR_DN		38	0.362717	1.11341	0.274645	0.416905	1	563	tags=18%, list=2%, signal=19%
LINDGREN_BLADDER_CANCER_WITH_LOH_IN_CHR9Q	LINDGREN_BLADDER_CANCER_WITH_LOH_IN_CHR9Q		101	0.302053	1.11319	0.221007	0.417072	1	4810	tags=38%, list=21%, signal=47%
BREDEMEYER_RAG_SIGNALING_NOT_VIA_ATM_UP	BREDEMEYER_RAG_SIGNALING_NOT_VIA_ATM_UP		56	0.333349	1.1131	0.256416	0.416965	1	3901	tags=27%, list=17%, signal=32%
BRUNO_HEMATOPOIESIS	BRUNO_HEMATOPOIESIS		63	0.326871	1.11302	0.250333	0.416853	1	4272	tags=35%, list=18%, signal=43%
LIU_VAV3_PROSTATE_CARCINOGENESIS_UP	LIU_VAV3_PROSTATE_CARCINOGENESIS_UP		80	0.313809	1.11159	0.231894	0.41965	1	2275	tags=19%, list=10%, signal=21%
HAHTOLA_MYCOSIS_FUNGOIDES_SKIN_DN	HAHTOLA_MYCOSIS_FUNGOIDES_SKIN_DN		25	0.395367	1.11156	0.295832	0.419415	1	4303	tags=40%, list=18%, signal=49%
ZHENG_BOUND_BY_FOXP3	ZHENG_BOUND_BY_FOXP3		455	0.254769	1.11154	0.115996	0.419143	1	3009	tags=20%, list=13%, signal=22%
VANHARANTA_UTERINE_FIBROID_DN	VANHARANTA_UTERINE_FIBROID_DN		59	0.330248	1.11154	0.245777	0.418842	1	4370	tags=36%, list=19%, signal=44%
WIEDERSCHAIN_TARGETS_OF_BMI1_AND_PCGF2	WIEDERSCHAIN_TARGETS_OF_BMI1_AND_PCGF2		54	0.336907	1.10982	0.255917	0.42228	1	1363	tags=15%, list=6%, signal=16%
REACTOME_NFKB_AND_MAP_KINASES_ACTIVATION_MEDIATED_BY_TLR4_SIGNALING_REPERTOIRE	REACTOME_NFKB_AND_MAP_KINASES_ACTIVATION_MEDIATED_BY_TLR4_SIGNALING_REPERTOIRE		69	0.323763	1.10958	0.24779	0.422513	1	2204	tags=17%, list=9%, signal=19%
DARWICHE_PAPILLOMA_RISK_HIGH_UP	DARWICHE_PAPILLOMA_RISK_HIGH_UP		127	0.291838	1.10793	0.222955	0.425815	1	3656	tags=25%, list=16%, signal=30%
GHANDHI_BYSTANDER_IRRADIATION_UP	GHANDHI_BYSTANDER_IRRADIATION_UP		72	0.319043	1.10783	0.245763	0.425715	1	3249	tags=22%, list=14%, signal=26%
KYNG_WERNER_SYNDROM_AND_NORMAL_AGING_DN	KYNG_WERNER_SYNDROM_AND_NORMAL_AGING_DN		198	0.276389	1.10698	0.192652	0.427299	1	3450	tags=24%, list=15%, signal=28%
RODWELL_AGING_KIDNEY_DN	RODWELL_AGING_KIDNEY_DN		125	0.29278	1.10609	0.220702	0.428938	1	5227	tags=36%, list=22%, signal=46%
BIOCARTA_UCALPAIN_PATHWAY	BIOCARTA_UCALPAIN_PATHWAY		18	0.428983	1.10556	0.318862	0.429801	1	4560	tags=39%, list=19%, signal=48%
KEGG_PRIMARY_BILE_ACID_BIOSYNTHESIS	KEGG_PRIMARY_BILE_ACID_BIOSYNTHESIS		15	0.451168	1.10537	0.323168	0.429914	1	1651	tags=27%, list=7%, signal=29%
HOFMANN_CELL_LYMPHOMA_UP	HOFMANN_CELL_LYMPHOMA_UP		46	0.345195	1.1053	0.267377	0.429766	1	5147	tags=37%, list=22%, signal=47%
ROSS_ACUTE_MYELOID_LEUKEMIA_CBF	ROSS_ACUTE_MYELOID_LEUKEMIA_CBF		74	0.317594	1.10526	0.255061	0.429536	1	1528	tags=15%, list=7%, signal=16%
ZHENG_GLIOBLASTOMA_PLASTICITY_DN	ZHENG_GLIOBLASTOMA_PLASTICITY_DN		57	0.331318	1.10502	0.271517	0.429766	1	2672	tags=19%, list=11%, signal=22%
ZHAN_MULTIPLE_MYELOMA_CD1_AND_CD2_DN	ZHAN_MULTIPLE_MYELOMA_CD1_AND_CD2_DN		45	0.346342	1.10499	0.28	0.429525	1	3496	tags=31%, list=15%, signal=37%
MEISSNER_NPC_ICP_WITH_H3_UNMETHYLATED	MEISSNER_NPC_ICP_WITH_H3_UNMETHYLATED		22	0.406166	1.10468	0.304933	0.429898	1	4047	tags=32%, list=17%, signal=38%
ROESSLER_LIVER_CANCER_METASTASIS_UP	ROESSLER_LIVER_CANCER_METASTASIS_UP		99	0.302075	1.10372	0.240361	0.431715	1	2523	tags=18%, list=11%, signal=20%
ST_ERK1_ERK2_MAPK_PATHWAY	ST_ERK1_ERK2_MAPK_PATHWAY		32	0.369352	1.10364	0.295619	0.431592	1	753	tags=13%, list=3%, signal=13%
PID_ECADHERIN_KERATINOCYTE_PATHWAY	PID_ECADHERIN_KERATINOCYTE_PATHWAY		20	0.41374	1.10359	0.314242	0.431392	1	4238	tags=35%, list=18%, signal=43%
AMUNDSON_POOR_SURVIVAL_AFTER_GAMMA_RADIATION_8G	AMUNDSON_POOR_SURVIVAL_AFTER_GAMMA_RADIATION_8G		93	0.302792	1.10316	0.244162	0.432038	1	3092	tags=24%, list=13%, signal=27%
SANSOM_APC_MYC_TARGETS	SANSOM_APC_MYC_TARGETS		196	0.275532	1.1014	0.20796	0.435605	1	3728	tags=24%, list=16%, signal=28%
DUNNE_TARGETS_OF_AML1_MTG8_FUSION_DN	DUNNE_TARGETS_OF_AML1_MTG8_FUSION_DN		18	0.427553	1.1013	0.321962	0.435512	1	4114	tags=33%, list=18%, signal=40%
LEE_AGING_CEREBELLUM_DN	LEE_AGING_CEREBELLUM_DN		83	0.308625	1.10103	0.252596	0.43582	1	3625	tags=24%, list=15%, signal=28%
AMUNDSON_GENOTOXIC_SIGNATURE	AMUNDSON_GENOTOXIC_SIGNATURE		98	0.302191	1.10059	0.248792	0.436504	1	4668	tags=26%, list=20%, signal=32%
TCGA_GLIOBLASTOMA_COPY_NUMBER_UP	TCGA_GLIOBLASTOMA_COPY_NUMBER_UP		63	0.325306	1.10054	0.266755	0.436309	1	4458	tags=37%, list=19%, signal=45%
NAGASHIMA_NRG1_SIGNALING_UP	NAGASHIMA_NRG1_SIGNALING_UP		168	0.279587	1.10047	0.214804	0.43615	1	3973	tags=24%, list=17%, signal=28%
LABBE_TARGETS_OF_TGFB1_AND_WNT3A_DN	LABBE_TARGETS_OF_TGFB1_AND_WNT3A_DN		98	0.30228	1.10029	0.242417	0.436242	1	2895	tags=18%, list=12%, signal=21%
LIU_SOX4_TARGETS_DN	LIU_SOX4_TARGETS_DN		288	0.262757	1.10025	0.171046	0.436017	1	5227	tags=31%, list=22%, signal=40%
FIGUEROA_AML_METHYLATION_CLUSTER_6_DN	FIGUEROA_AML_METHYLATION_CLUSTER_6_DN		29	0.378322	1.10018	0.30552	0.435865	1	3428	tags=28%, list=15%, signal=32%
LI_CYTIDINE_ANALOG_PATHWAY	LI_CYTIDINE_ANALOG_PATHWAY		17	0.431804	1.09995	0.322843	0.436067	1	3378	tags=41%, list=14%, signal=48%
BIOCARTA_PTEN_PATHWAY	BIOCARTA_PTEN_PATHWAY		17	0.429409	1.09844	0.327242	0.43915	1	4539	tags=29%, list=19%, signal=36%
GAVIN_FOXP3_TARGETS_CLUSTER_P7	GAVIN_FOXP3_TARGETS_CLUSTER_P7		84	0.309456	1.09816	0.259823	0.439468	1	948	tags=14%, list=4%, signal=15%
STEIN_ESRRA_TARGETS_RESPONSIVE_TO_ESTROGEN_UP	STEIN_ESRRA_TARGETS_RESPONSIVE_TO_ESTROGEN_UP		24	0.395419	1.09776	0.308506	0.44004	1	3976	tags=42%, list=17%, signal=50%
VALK_AML_WITH_EVI1	VALK_AML_WITH_EVI1		19	0.421264	1.09683	0.32146	0.44183	1	4032	tags=37%, list=17%, signal=44%
SAGIV_CD24_TARGETS_UP	SAGIV_CD24_TARGETS_UP		21	0.409973	1.09671	0.31877	0.441797	1	996	tags=19%, list=4%, signal=20%
REACTOME_ADP_SIGNALLING_THROUGH_P2RY12	REACTOME_ADP_SIGNALLING_THROUGH_P2RY12		21	0.409997	1.0962	0.320077	0.442648	1	3419	tags=38%, list=15%, signal=45%
REACTOME_AMINE_DERIVED_HORMONES	REACTOME_AMINE_DERIVED_HORMONES		15	0.446832	1.096	0.329531	0.442787	1	190	tags=7%, list=1%, signal=7%
KEGG_PHENYLALANINE_METABOLISM	KEGG_PHENYLALANINE_METABOLISM		18	0.424586	1.0958	0.325327	0.442927	1	2508	tags=22%, list=11%, signal=25%
KEGG_LEUKOCYTE_TRANSENDOTHELIAL_MIGRATION	KEGG_LEUKOCYTE_TRANSENDOTHELIAL_MIGRATION		113	0.294444	1.09572	0.247557	0.442787	1	2652	tags=18%, list=11%, signal=20%
ASTIER_INTEGRIN_SIGNALING	ASTIER_INTEGRIN_SIGNALING		55	0.331526	1.09545	0.286439	0.443097	1	2655	tags=25%, list=11%, signal=29%
LIEN_BREAST_CARCINOMA_METAPLASTIC_VS_DUCTAL_DN	LIEN_BREAST_CARCINOMA_METAPLASTIC_VS_DUCTAL_DN		91	0.303432	1.09544	0.258424	0.442809	1	3015	tags=24%, list=13%, signal=28%
REACTOME_G1_S_SPECIFIC_TRANSCRIPTION	REACTOME_G1_S_SPECIFIC_TRANSCRIPTION		17	0.43014	1.09535	0.331991	0.442712	1	4190	tags=35%, list=18%, signal=43%
JOHNSTONE_PARVB_TARGETS_3_UP	JOHNSTONE_PARVB_TARGETS_3_UP		385	0.254857	1.09529	0.160832	0.442527	1	3926	tags=24%, list=17%, signal=28%
MANTOVANI_NFKB_TARGETS_UP	MANTOVANI_NFKB_TARGETS_UP		42	0.350208	1.09523	0.293901	0.44235	1	1709	tags=19%, list=7%, signal=21%
VALK_AML_CLUSTER_1	VALK_AML_CLUSTER_1		27	0.383083	1.09518	0.310492	0.44216	1	1723	tags=30%, list=7%, signal=32%
TSENG_IRS1_TARGETS_UP	TSENG_IRS1_TARGETS_UP		103	0.29828	1.09505	0.24501	0.442148	1	5094	tags=38%, list=22%, signal=48%
WANG_NEOPLASTIC_TRANSFORMATION_BY_CCND1_MYC	WANG_NEOPLASTIC_TRANSFORMATION_BY_CCND1_MYC		21	0.409579	1.09483	0.319162	0.442338	1	3810	tags=29%, list=16%, signal=34%
GALLUZZI_PREVENT_MITOCHONDIAL_PERMEABILIZATION	GALLUZZI_PREVENT_MITOCHONDIAL_PERMEABILIZATION		21	0.406807	1.09372	0.323914	0.44455	1	3956	tags=38%, list=17%, signal=46%
MCBRYAN_PUBERTAL_TGFB1_TARGETS_UP	MCBRYAN_PUBERTAL_TGFB1_TARGETS_UP		166	0.278504	1.09345	0.223571	0.444852	1	3778	tags=31%, list=16%, signal=36%
SCHAEFFER_SOX9_TARGETS_IN_PROSTATE_DEVELOPMENT_DN	SCHAEFFER_SOX9_TARGETS_IN_PROSTATE_DEVELOPMENT_DN		44	0.342662	1.09329	0.295207	0.444905	1	4444	tags=36%, list=19%, signal=45%
OUILLETTE_CLL_13Q14_DELETION_DN	OUILLETTE_CLL_13Q14_DELETION_DN		53	0.33229	1.09311	0.28755	0.444994	1	2477	tags=21%, list=11%, signal=23%
WAKABAYASHI_ADIPOGENESIS_PPARG_RXRA_BOUND_36HR	WAKABAYASHI_ADIPOGENESIS_PPARG_RXRA_BOUND_36HR		141	0.285176	1.093	0.23599	0.444919	1	3049	tags=23%, list=13%, signal=26%
YAMASHITA_LIVER_CANCER_STEM_CELL_DN	YAMASHITA_LIVER_CANCER_STEM_CELL_DN		66	0.318655	1.09281	0.277999	0.445021	1	1648	tags=11%, list=7%, signal=11%
NIKOLSKY_OVERCONNECTED_IN_BREAST_CANCER	NIKOLSKY_OVERCONNECTED_IN_BREAST_CANCER		21	0.407214	1.09279	0.319158	0.444776	1	2133	tags=24%, list=9%, signal=26%
CUI_GLUCOSE_DEPRIVATION	CUI_GLUCOSE_DEPRIVATION		58	0.325726	1.09217	0.284091	0.445854	1	2861	tags=26%, list=12%, signal=29%
LEIN_ASTROCYTE_MARKERS	LEIN_ASTROCYTE_MARKERS		39	0.352131	1.09187	0.305377	0.446231	1	4012	tags=31%, list=17%, signal=37%
OSWALD_HEMATOPOIETIC_STEM_CELL_IN_COLLAGEN_GEL_UP	OSWALD_HEMATOPOIETIC_STEM_CELL_IN_COLLAGEN_GEL_UP		213	0.269783	1.09119	0.219366	0.447449	1	4375	tags=28%, list=19%, signal=34%
TSAI_RESPONSE_TO_RADIATION_THERAPY	TSAI_RESPONSE_TO_RADIATION_THERAPY		30	0.372543	1.09117	0.315628	0.447173	1	546	tags=13%, list=2%, signal=14%
BIOCARTA_GSK3_PATHWAY	BIOCARTA_GSK3_PATHWAY		27	0.384649	1.09073	0.318894	0.447866	1	5103	tags=33%, list=22%, signal=43%
GAL_LEUKEMIC_STEM_CELL_DN	GAL_LEUKEMIC_STEM_CELL_DN		211	0.269629	1.08985	0.212524	0.449535	1	3874	tags=29%, list=17%, signal=35%
BIOCARTA_RACCYCD_PATHWAY	BIOCARTA_RACCYCD_PATHWAY		25	0.391323	1.08967	0.31825	0.449659	1	4539	tags=32%, list=19%, signal=40%
KEGG_NEUROTROPHIN_SIGNALING_PATHWAY	KEGG_NEUROTROPHIN_SIGNALING_PATHWAY		118	0.290197	1.08953	0.253976	0.449658	1	2985	tags=21%, list=13%, signal=24%
HESS_TARGETS_OF_HOXA9_AND_MEIS1_DN	HESS_TARGETS_OF_HOXA9_AND_MEIS1_DN		69	0.315644	1.08934	0.278651	0.44978	1	4261	tags=39%, list=18%, signal=48%
KEGG_TYPE_I_DIABETES_MELLITUS	KEGG_TYPE_I_DIABETES_MELLITUS		21	0.403274	1.08902	0.330163	0.4502	1	504	tags=14%, list=2%, signal=15%
REACTOME_RNA_POL_III_TRANSCRIPTION_TERMINATION	REACTOME_RNA_POL_III_TRANSCRIPTION_TERMINATION		19	0.417432	1.08879	0.338943	0.450398	1	2857	tags=26%, list=12%, signal=30%
REACTOME_ACTIVATION_OF_NMDA_RECEPTOR_UPON_GLUTAMATE_BINDING_AND_POSTSYNAPTIC_EVENTS	REACTOME_ACTIVATION_OF_NMDA_RECEPTOR_UPON_GLUTAMATE_BINDING_AND_POSTSYNAPTIC_EVENTS		36	0.359144	1.08866	0.307207	0.450383	1	1644	tags=19%, list=7%, signal=21%
KEGG_AUTOIMMUNE_THYROID_DISEASE	KEGG_AUTOIMMUNE_THYROID_DISEASE		26	0.385687	1.0876	0.328166	0.452498	1	2413	tags=12%, list=10%, signal=13%
BROWNE_HCMV_INFECTION_16HR_UP	BROWNE_HCMV_INFECTION_16HR_UP		207	0.268226	1.08754	0.220681	0.452325	1	4563	tags=27%, list=19%, signal=33%
LIU_NASOPHARYNGEAL_CARCINOMA	LIU_NASOPHARYNGEAL_CARCINOMA		60	0.322727	1.08744	0.288698	0.452229	1	3503	tags=32%, list=15%, signal=37%
LEE_LIVER_CANCER_DENA_UP	LEE_LIVER_CANCER_DENA_UP		56	0.325737	1.08727	0.294609	0.452324	1	816	tags=13%, list=3%, signal=13%
ZHONG_RESPONSE_TO_AZACITIDINE_AND_TSA_UP	ZHONG_RESPONSE_TO_AZACITIDINE_AND_TSA_UP		160	0.277586	1.08725	0.237304	0.452061	1	4466	tags=28%, list=19%, signal=35%
PID_SMAD2_3NUCLEAR_PATHWAY	PID_SMAD2_3NUCLEAR_PATHWAY		81	0.307373	1.08711	0.270667	0.45204	1	2366	tags=20%, list=10%, signal=22%
BIOCARTA_WNT_PATHWAY	BIOCARTA_WNT_PATHWAY		26	0.383714	1.0867	0.320382	0.452677	1	3486	tags=27%, list=15%, signal=32%
TING_SILENCED_BY_DICER	TING_SILENCED_BY_DICER		26	0.385005	1.08605	0.319366	0.453856	1	2412	tags=23%, list=10%, signal=26%
CHANDRAN_METASTASIS_TOP50_DN	CHANDRAN_METASTASIS_TOP50_DN		44	0.342743	1.08596	0.313725	0.453733	1	2988	tags=30%, list=13%, signal=34%
VERNELL_RETINOBLASTOMA_PATHWAY_UP	VERNELL_RETINOBLASTOMA_PATHWAY_UP		69	0.315039	1.08544	0.283023	0.454607	1	4260	tags=30%, list=18%, signal=37%
BROWNE_HCMV_INFECTION_14HR_UP	BROWNE_HCMV_INFECTION_14HR_UP		138	0.282102	1.08503	0.253336	0.455248	1	3761	tags=27%, list=16%, signal=32%
FINETTI_BREAST_CANCERS_KINOME_GRAY	FINETTI_BREAST_CANCERS_KINOME_GRAY		15	0.441135	1.08465	0.341682	0.455833	1	7906	tags=67%, list=34%, signal=101%
WANG_METASTASIS_OF_BREAST_CANCER_ESR1_DN	WANG_METASTASIS_OF_BREAST_CANCER_ESR1_DN		25	0.388422	1.08409	0.329849	0.456785	1	3880	tags=40%, list=17%, signal=48%
LIAO_METASTASIS	LIAO_METASTASIS		468	0.247937	1.0838	0.163598	0.457174	1	5175	tags=33%, list=22%, signal=41%
BIOCARTA_ACH_PATHWAY	BIOCARTA_ACH_PATHWAY		15	0.440592	1.08363	0.344234	0.457244	1	4238	tags=40%, list=18%, signal=49%
REACTOME_INTEGRIN_ALPHAIIB_BETA3_SIGNALING	REACTOME_INTEGRIN_ALPHAIIB_BETA3_SIGNALING		27	0.37997	1.08275	0.32527	0.458952	1	2511	tags=22%, list=11%, signal=25%
REACTOME_RNA_POL_III_TRANSCRIPTION_INITIATION_FROM_TYPE_2_PROMOTER	REACTOME_RNA_POL_III_TRANSCRIPTION_INITIATION_FROM_TYPE_2_PROMOTER		23	0.395299	1.08217	0.335592	0.459974	1	6056	tags=43%, list=26%, signal=59%
ZHAN_MULTIPLE_MYELOMA_HP_DN	ZHAN_MULTIPLE_MYELOMA_HP_DN		42	0.34557	1.08215	0.31491	0.459716	1	3592	tags=29%, list=15%, signal=34%
MARSON_FOXP3_TARGETS_UP	MARSON_FOXP3_TARGETS_UP		62	0.320586	1.08191	0.296451	0.459948	1	4910	tags=42%, list=21%, signal=53%
FRASOR_RESPONSE_TO_ESTRADIOL_DN	FRASOR_RESPONSE_TO_ESTRADIOL_DN		76	0.309934	1.08181	0.290168	0.459868	1	4011	tags=26%, list=17%, signal=32%
ICHIBA_GRAFT_VERSUS_HOST_DISEASE_35D_UP	ICHIBA_GRAFT_VERSUS_HOST_DISEASE_35D_UP		118	0.287569	1.08162	0.268091	0.459974	1	3492	tags=30%, list=15%, signal=35%
BERTUCCI_MEDULLARY_VS_DUCTAL_BREAST_CANCER_DN	BERTUCCI_MEDULLARY_VS_DUCTAL_BREAST_CANCER_DN		155	0.277652	1.08129	0.253923	0.460431	1	4608	tags=34%, list=20%, signal=42%
VERHAAK_GLIOBLASTOMA_MESENCHYMAL	VERHAAK_GLIOBLASTOMA_MESENCHYMAL		198	0.269536	1.08096	0.244639	0.460867	1	3900	tags=24%, list=17%, signal=28%
WAKABAYASHI_ADIPOGENESIS_PPARG_BOUND_36HR	WAKABAYASHI_ADIPOGENESIS_PPARG_BOUND_36HR		28	0.37578	1.08059	0.319572	0.461411	1	4893	tags=29%, list=21%, signal=36%
RASHI_NFKB1_TARGETS	RASHI_NFKB1_TARGETS		18	0.416535	1.08058	0.336619	0.461121	1	4091	tags=28%, list=17%, signal=34%
REACTOME_PI3K_CASCADE	REACTOME_PI3K_CASCADE		66	0.317021	1.08044	0.303476	0.461128	1	4956	tags=33%, list=21%, signal=42%
BIOCARTA_HDAC_PATHWAY	BIOCARTA_HDAC_PATHWAY		27	0.380289	1.08031	0.331536	0.46112	1	1953	tags=26%, list=8%, signal=28%
BOYAULT_LIVER_CANCER_SUBCLASS_G123_DN	BOYAULT_LIVER_CANCER_SUBCLASS_G123_DN		49	0.335401	1.08002	0.311728	0.461456	1	4531	tags=33%, list=19%, signal=40%
TORCHIA_TARGETS_OF_EWSR1_FLI1_FUSION_TOP20_UP	TORCHIA_TARGETS_OF_EWSR1_FLI1_FUSION_TOP20_UP		17	0.424834	1.07936	0.340439	0.462666	1	2328	tags=35%, list=10%, signal=39%
TIEN_INTESTINE_PROBIOTICS_6HR_DN	TIEN_INTESTINE_PROBIOTICS_6HR_DN		156	0.278057	1.07888	0.262588	0.463479	1	3947	tags=29%, list=17%, signal=34%
TIAN_TNF_SIGNALING_VIA_NFKB	TIAN_TNF_SIGNALING_VIA_NFKB		28	0.375416	1.07838	0.330207	0.464321	1	1559	tags=18%, list=7%, signal=19%
BOYAULT_LIVER_CANCER_SUBCLASS_G12_UP	BOYAULT_LIVER_CANCER_SUBCLASS_G12_UP		36	0.356385	1.0783	0.319472	0.464197	1	3950	tags=31%, list=17%, signal=37%
LEIN_NEURON_MARKERS	LEIN_NEURON_MARKERS		65	0.315634	1.07787	0.300682	0.464877	1	2984	tags=25%, list=13%, signal=28%
UEDA_CENTRAL_CLOCK	UEDA_CENTRAL_CLOCK		84	0.302624	1.0776	0.294091	0.465179	1	3761	tags=29%, list=16%, signal=34%
BILANGES_SERUM_SENSITIVE_GENES	BILANGES_SERUM_SENSITIVE_GENES		83	0.301237	1.07705	0.291328	0.466161	1	4034	tags=30%, list=17%, signal=36%
WESTON_VEGFA_TARGETS_3HR	WESTON_VEGFA_TARGETS_3HR		70	0.310815	1.07693	0.298234	0.466117	1	1788	tags=16%, list=8%, signal=17%
CAIRO_HEPATOBLASTOMA_UP	CAIRO_HEPATOBLASTOMA_UP		188	0.270805	1.07687	0.251379	0.465952	1	3950	tags=29%, list=17%, signal=35%
REACTOME_NUCLEAR_RECEPTOR_TRANSCRIPTION_PATHWAY	REACTOME_NUCLEAR_RECEPTOR_TRANSCRIPTION_PATHWAY		47	0.3368	1.07679	0.311552	0.465823	1	3555	tags=32%, list=15%, signal=38%
MODY_HIPPOCAMPUS_NEONATAL	MODY_HIPPOCAMPUS_NEONATAL		33	0.360226	1.07673	0.337057	0.465639	1	4455	tags=45%, list=19%, signal=56%
REACTOME_ACTIVATED_TLR4_SIGNALLING	REACTOME_ACTIVATED_TLR4_SIGNALLING		89	0.300442	1.07661	0.297291	0.465612	1	2204	tags=16%, list=9%, signal=17%
HUMMERICH_SKIN_CANCER_PROGRESSION_DN	HUMMERICH_SKIN_CANCER_PROGRESSION_DN		98	0.294726	1.07614	0.286604	0.466411	1	1537	tags=16%, list=7%, signal=17%
BIOCARTA_IL12_PATHWAY	BIOCARTA_IL12_PATHWAY		21	0.40292	1.07607	0.341702	0.466274	1	2133	tags=19%, list=9%, signal=21%
BIOCARTA_MCALPAIN_PATHWAY	BIOCARTA_MCALPAIN_PATHWAY		23	0.39142	1.0756	0.339375	0.467037	1	3078	tags=26%, list=13%, signal=30%
WANG_RESPONSE_TO_BEXAROTENE_DN	WANG_RESPONSE_TO_BEXAROTENE_DN		26	0.380795	1.07518	0.343859	0.467712	1	1840	tags=19%, list=8%, signal=21%
DAZARD_UV_RESPONSE_CLUSTER_G2	DAZARD_UV_RESPONSE_CLUSTER_G2		29	0.370955	1.0748	0.336664	0.468273	1	2861	tags=31%, list=12%, signal=35%
WINTER_HYPOXIA_DN	WINTER_HYPOXIA_DN		47	0.334902	1.07468	0.316799	0.468236	1	1978	tags=19%, list=8%, signal=21%
PARK_HSC_VS_MULTIPOTENT_PROGENITORS_UP	PARK_HSC_VS_MULTIPOTENT_PROGENITORS_UP		18	0.414309	1.07464	0.350447	0.468019	1	2592	tags=33%, list=11%, signal=37%
SHAFFER_IRF4_TARGETS_IN_PLASMA_CELL_VS_MATURE_B_LYMPHOCYTE	SHAFFER_IRF4_TARGETS_IN_PLASMA_CELL_VS_MATURE_B_LYMPHOCYTE		65	0.316351	1.07462	0.309005	0.467756	1	4282	tags=34%, list=18%, signal=41%
HENDRICKS_SMARCA4_TARGETS_DN	HENDRICKS_SMARCA4_TARGETS_DN		47	0.334142	1.07451	0.319154	0.46769	1	4218	tags=32%, list=18%, signal=39%
PID_INSULIN_GLUCOSE_PATHWAY	PID_INSULIN_GLUCOSE_PATHWAY		23	0.391509	1.07422	0.338662	0.468057	1	3377	tags=30%, list=14%, signal=36%
PID_TGFBR_PATHWAY	PID_TGFBR_PATHWAY		55	0.322933	1.0739	0.314286	0.468469	1	3260	tags=22%, list=14%, signal=25%
HOSHIDA_LIVER_CANCER_SUBCLASS_S3	HOSHIDA_LIVER_CANCER_SUBCLASS_S3		243	0.260978	1.07371	0.235739	0.468593	1	4283	tags=30%, list=18%, signal=36%
MARCHINI_TRABECTEDIN_RESISTANCE_UP	MARCHINI_TRABECTEDIN_RESISTANCE_UP		17	0.420033	1.07347	0.354114	0.468846	1	1174	tags=29%, list=5%, signal=31%
REACTOME_SIGNALLING_BY_NGF	REACTOME_SIGNALLING_BY_NGF		209	0.265725	1.07345	0.251511	0.468592	1	4659	tags=28%, list=20%, signal=35%
BIOCARTA_TEL_PATHWAY	BIOCARTA_TEL_PATHWAY		17	0.422762	1.07238	0.357617	0.47079	1	3175	tags=41%, list=14%, signal=48%
SANSOM_APC_TARGETS_REQUIRE_MYC	SANSOM_APC_TARGETS_REQUIRE_MYC		191	0.268353	1.07235	0.262708	0.470541	1	4846	tags=31%, list=21%, signal=39%
FINAK_BREAST_CANCER_SDPP_SIGNATURE	FINAK_BREAST_CANCER_SDPP_SIGNATURE		23	0.390835	1.07232	0.349333	0.47029	1	588	tags=13%, list=3%, signal=13%
REACTOME_SIGNALLING_TO_ERKS	REACTOME_SIGNALLING_TO_ERKS		35	0.353956	1.07208	0.335688	0.470554	1	4587	tags=31%, list=20%, signal=39%
WIERENGA_STAT5A_TARGETS_UP	WIERENGA_STAT5A_TARGETS_UP		190	0.268034	1.07119	0.261859	0.472311	1	5283	tags=33%, list=23%, signal=42%
REACTOME_G2_M_CHECKPOINTS	REACTOME_G2_M_CHECKPOINTS		41	0.342253	1.07077	0.328361	0.472989	1	4147	tags=32%, list=18%, signal=38%
ABE_INNER_EAR	ABE_INNER_EAR		45	0.336071	1.06988	0.334138	0.474727	1	4210	tags=38%, list=18%, signal=46%
CHANDRAN_METASTASIS_UP	CHANDRAN_METASTASIS_UP		184	0.268691	1.06939	0.26245	0.475558	1	3920	tags=27%, list=17%, signal=32%
BURTON_ADIPOGENESIS_4	BURTON_ADIPOGENESIS_4		43	0.339594	1.06919	0.329528	0.475707	1	4424	tags=44%, list=19%, signal=54%
MAHADEVAN_IMATINIB_RESISTANCE_DN	MAHADEVAN_IMATINIB_RESISTANCE_DN		17	0.42242	1.06917	0.35794	0.475447	1	586	tags=12%, list=3%, signal=12%
MITSIADES_RESPONSE_TO_APLIDIN_UP	MITSIADES_RESPONSE_TO_APLIDIN_UP		375	0.250039	1.06876	0.218206	0.476086	1	4025	tags=26%, list=17%, signal=30%
SANSOM_APC_TARGETS_UP	SANSOM_APC_TARGETS_UP		117	0.285138	1.06835	0.296714	0.476744	1	3852	tags=26%, list=16%, signal=32%
CROMER_METASTASIS_UP	CROMER_METASTASIS_UP		71	0.307263	1.0673	0.3177	0.478878	1	2974	tags=24%, list=13%, signal=27%
REACTOME_MAP_KINASE_ACTIVATION_IN_TLR_CASCADE	REACTOME_MAP_KINASE_ACTIVATION_IN_TLR_CASCADE		49	0.329665	1.06717	0.326106	0.478881	1	2204	tags=16%, list=9%, signal=18%
DASU_IL6_SIGNALING_SCAR_UP	DASU_IL6_SIGNALING_SCAR_UP		30	0.363864	1.06706	0.348812	0.478815	1	4283	tags=50%, list=18%, signal=61%
PID_ANTHRAX_PATHWAY	PID_ANTHRAX_PATHWAY		16	0.426203	1.06663	0.36714	0.479522	1	578	tags=19%, list=2%, signal=19%
REACTOME_SEMAPHORIN_INTERACTIONS	REACTOME_SEMAPHORIN_INTERACTIONS		63	0.314493	1.06653	0.325301	0.479441	1	3463	tags=25%, list=15%, signal=30%
HERNANDEZ_MITOTIC_ARREST_BY_DOCETAXEL_2_UP	HERNANDEZ_MITOTIC_ARREST_BY_DOCETAXEL_2_UP		59	0.319182	1.06644	0.329018	0.479343	1	2099	tags=19%, list=9%, signal=20%
NIKOLSKY_BREAST_CANCER_17Q11_Q21_AMPLICON	NIKOLSKY_BREAST_CANCER_17Q11_Q21_AMPLICON		110	0.287506	1.06574	0.306076	0.480693	1	5093	tags=35%, list=22%, signal=45%
KYNG_ENVIRONMENTAL_STRESS_RESPONSE_NOT_BY_GAMMA_IN_OLD	KYNG_ENVIRONMENTAL_STRESS_RESPONSE_NOT_BY_GAMMA_IN_OLD		27	0.373506	1.06496	0.35678	0.482198	1	4486	tags=30%, list=19%, signal=37%
YUAN_ZNF143_PARTNERS	YUAN_ZNF143_PARTNERS		22	0.389804	1.06409	0.362215	0.483948	1	2680	tags=23%, list=11%, signal=26%
WATANABE_RECTAL_CANCER_RADIOTHERAPY_RESPONSIVE_DN	WATANABE_RECTAL_CANCER_RADIOTHERAPY_RESPONSIVE_DN		85	0.297085	1.06408	0.308363	0.483666	1	4481	tags=40%, list=19%, signal=49%
PID_PRL_SIGNALING_EVENTS_PATHWAY	PID_PRL_SIGNALING_EVENTS_PATHWAY		23	0.38804	1.0634	0.357908	0.484967	1	6277	tags=52%, list=27%, signal=71%
BIOCARTA_EIF4_PATHWAY	BIOCARTA_EIF4_PATHWAY		24	0.382646	1.063	0.355705	0.485608	1	1215	tags=17%, list=5%, signal=18%
REACTOME_METABOLISM_OF_VITAMINS_AND_COFACTORS	REACTOME_METABOLISM_OF_VITAMINS_AND_COFACTORS		49	0.327579	1.06273	0.343189	0.485922	1	4687	tags=33%, list=20%, signal=41%
SHIN_B_CELL_LYMPHOMA_CLUSTER_5	SHIN_B_CELL_LYMPHOMA_CLUSTER_5		17	0.418568	1.06262	0.374527	0.485864	1	849	tags=24%, list=4%, signal=24%
GENTILE_UV_RESPONSE_CLUSTER_D5	GENTILE_UV_RESPONSE_CLUSTER_D5		36	0.349761	1.06203	0.346187	0.486971	1	3910	tags=28%, list=17%, signal=33%
PETROVA_ENDOTHELIUM_LYMPHATIC_VS_BLOOD_DN	PETROVA_ENDOTHELIUM_LYMPHATIC_VS_BLOOD_DN		146	0.275164	1.06104	0.301396	0.48904	1	1793	tags=17%, list=8%, signal=18%
REACTOME_RECYCLING_PATHWAY_OF_L1	REACTOME_RECYCLING_PATHWAY_OF_L1		24	0.381332	1.0603	0.363792	0.490493	1	2935	tags=29%, list=13%, signal=33%
WEI_MIR34A_TARGETS	WEI_MIR34A_TARGETS		139	0.275955	1.06	0.299813	0.490873	1	5198	tags=37%, list=22%, signal=48%
SCHLESINGER_H3K27ME3_IN_NORMAL_AND_METHYLATED_IN_CANCER	SCHLESINGER_H3K27ME3_IN_NORMAL_AND_METHYLATED_IN_CANCER		27	0.371636	1.05968	0.357459	0.491334	1	4881	tags=30%, list=21%, signal=37%
MCBRYAN_PUBERTAL_BREAST_5_6WK_UP	MCBRYAN_PUBERTAL_BREAST_5_6WK_UP		110	0.285382	1.05967	0.315025	0.491022	1	2326	tags=18%, list=10%, signal=20%
BIOCARTA_TH1TH2_PATHWAY	BIOCARTA_TH1TH2_PATHWAY		16	0.421009	1.05958	0.36765	0.49092	1	3977	tags=25%, list=17%, signal=30%
PID_AVB3_INTEGRIN_PATHWAY	PID_AVB3_INTEGRIN_PATHWAY		75	0.304234	1.05951	0.31947	0.490768	1	1779	tags=13%, list=8%, signal=14%
KEGG_ALDOSTERONE_REGULATED_SODIUM_REABSORPTION	KEGG_ALDOSTERONE_REGULATED_SODIUM_REABSORPTION		41	0.339772	1.05944	0.348984	0.490622	1	2073	tags=24%, list=9%, signal=27%
BIDUS_METASTASIS_DN	BIDUS_METASTASIS_DN		135	0.276727	1.0591	0.298695	0.491119	1	4659	tags=31%, list=20%, signal=39%
QI_PLASMACYTOMA_DN	QI_PLASMACYTOMA_DN		99	0.289451	1.05873	0.320894	0.491673	1	3849	tags=31%, list=16%, signal=37%
GRAESSMANN_APOPTOSIS_BY_SERUM_DEPRIVATION_DN	GRAESSMANN_APOPTOSIS_BY_SERUM_DEPRIVATION_DN		210	0.261603	1.0587	0.284302	0.491426	1	4520	tags=32%, list=19%, signal=40%
CHARAFE_BREAST_CANCER_BASAL_VS_MESENCHYMAL_UP	CHARAFE_BREAST_CANCER_BASAL_VS_MESENCHYMAL_UP		103	0.287329	1.05811	0.315789	0.492533	1	2668	tags=21%, list=11%, signal=24%
BIOCARTA_CTLA4_PATHWAY	BIOCARTA_CTLA4_PATHWAY		16	0.422249	1.05798	0.372633	0.49252	1	351	tags=13%, list=1%, signal=13%
BIOCARTA_RAC1_PATHWAY	BIOCARTA_RAC1_PATHWAY		23	0.388021	1.05706	0.370183	0.494437	1	4590	tags=48%, list=20%, signal=59%
RAO_BOUND_BY_SALL4	RAO_BOUND_BY_SALL4		203	0.262818	1.05696	0.286357	0.494348	1	2772	tags=19%, list=12%, signal=21%
CAMPS_COLON_CANCER_COPY_NUMBER_DN	CAMPS_COLON_CANCER_COPY_NUMBER_DN		33	0.354574	1.05654	0.361472	0.495057	1	3815	tags=36%, list=16%, signal=43%
FIGUEROA_AML_METHYLATION_CLUSTER_4_UP	FIGUEROA_AML_METHYLATION_CLUSTER_4_UP		93	0.291195	1.05638	0.320712	0.495113	1	3645	tags=28%, list=16%, signal=33%
PID_EPHA2_FWD_PATHWAY	PID_EPHA2_FWD_PATHWAY		18	0.409354	1.05596	0.369481	0.495801	1	4238	tags=39%, list=18%, signal=47%
SHETH_LIVER_CANCER_VS_TXNIP_LOSS_PAM4	SHETH_LIVER_CANCER_VS_TXNIP_LOSS_PAM4		232	0.258579	1.05577	0.280958	0.495959	1	3799	tags=25%, list=16%, signal=29%
WILLERT_WNT_SIGNALING	WILLERT_WNT_SIGNALING		20	0.400561	1.05543	0.370625	0.496444	1	3868	tags=35%, list=17%, signal=42%
BIOCARTA_FAS_PATHWAY	BIOCARTA_FAS_PATHWAY		28	0.369604	1.05517	0.372282	0.496755	1	5593	tags=36%, list=24%, signal=47%
REACTOME_POST_NMDA_RECEPTOR_ACTIVATION_EVENTS	REACTOME_POST_NMDA_RECEPTOR_ACTIVATION_EVENTS		32	0.354396	1.05367	0.35845	0.500097	1	3311	tags=25%, list=14%, signal=29%
NAKAMURA_ADIPOGENESIS_EARLY_UP	NAKAMURA_ADIPOGENESIS_EARLY_UP		55	0.318693	1.05354	0.347711	0.50009	1	4044	tags=29%, list=17%, signal=35%
REACTOME_FATTY_ACID_TRIACYLGLYCEROL_AND_KETONE_BODY_METABOLISM	REACTOME_FATTY_ACID_TRIACYLGLYCEROL_AND_KETONE_BODY_METABOLISM		165	0.267967	1.05351	0.307981	0.49982	1	4379	tags=30%, list=19%, signal=36%
PID_AP1_PATHWAY	PID_AP1_PATHWAY		66	0.308808	1.05349	0.339282	0.499551	1	2672	tags=18%, list=11%, signal=20%
PID_HNF3A_PATHWAY	PID_HNF3A_PATHWAY		38	0.344295	1.05292	0.358134	0.500615	1	1472	tags=16%, list=6%, signal=17%
BIOCARTA_BCELLSURVIVAL_PATHWAY	BIOCARTA_BCELLSURVIVAL_PATHWAY		16	0.420145	1.05267	0.383176	0.500889	1	4249	tags=44%, list=18%, signal=53%
SMITH_TERT_TARGETS_DN	SMITH_TERT_TARGETS_DN		85	0.294716	1.05187	0.338511	0.502505	1	4128	tags=33%, list=18%, signal=40%
LANDIS_ERBB2_BREAST_TUMORS_65_UP	LANDIS_ERBB2_BREAST_TUMORS_65_UP		21	0.39095	1.05105	0.378041	0.504182	1	39	tags=10%, list=0%, signal=10%
GOTTWEIN_TARGETS_OF_KSHV_MIR_K12_11	GOTTWEIN_TARGETS_OF_KSHV_MIR_K12_11		56	0.316021	1.05077	0.350649	0.504539	1	2986	tags=25%, list=13%, signal=29%
HOSHIDA_LIVER_CANCER_SURVIVAL_DN	HOSHIDA_LIVER_CANCER_SURVIVAL_DN		104	0.286144	1.05043	0.33203	0.505042	1	2892	tags=21%, list=12%, signal=24%
NELSON_RESPONSE_TO_ANDROGEN_DN	NELSON_RESPONSE_TO_ANDROGEN_DN		19	0.401102	1.0504	0.385443	0.504803	1	2032	tags=21%, list=9%, signal=23%
SCHEIDEREIT_IKK_INTERACTING_PROTEINS	SCHEIDEREIT_IKK_INTERACTING_PROTEINS		58	0.314572	1.05013	0.354724	0.505123	1	3316	tags=19%, list=14%, signal=22%
GENTILE_UV_RESPONSE_CLUSTER_D2	GENTILE_UV_RESPONSE_CLUSTER_D2		39	0.339273	1.04983	0.372863	0.505524	1	928	tags=13%, list=4%, signal=13%
HOWLIN_CITED1_TARGETS_2_DN	HOWLIN_CITED1_TARGETS_2_DN		16	0.421312	1.04967	0.385589	0.505565	1	4763	tags=44%, list=20%, signal=55%
PID_FAK_PATHWAY	PID_FAK_PATHWAY		57	0.314952	1.04961	0.357003	0.505389	1	948	tags=12%, list=4%, signal=13%
REACTOME_REGULATION_OF_BETA_CELL_DEVELOPMENT	REACTOME_REGULATION_OF_BETA_CELL_DEVELOPMENT		29	0.360811	1.04915	0.365775	0.506202	1	560	tags=7%, list=2%, signal=7%
CHEOK_RESPONSE_TO_MERCAPTOPURINE_DN	CHEOK_RESPONSE_TO_MERCAPTOPURINE_DN		18	0.40711	1.04839	0.383961	0.50771	1	3028	tags=33%, list=13%, signal=38%
KYNG_ENVIRONMENTAL_STRESS_RESPONSE_NOT_BY_4NQO_IN_WS	KYNG_ENVIRONMENTAL_STRESS_RESPONSE_NOT_BY_4NQO_IN_WS		35	0.348622	1.04787	0.366835	0.508663	1	3694	tags=23%, list=16%, signal=27%
REACTOME_GLYCOSAMINOGLYCAN_METABOLISM	REACTOME_GLYCOSAMINOGLYCAN_METABOLISM		107	0.282332	1.04773	0.34365	0.508688	1	2973	tags=24%, list=13%, signal=28%
REACTOME_CYCLIN_A_B1_ASSOCIATED_EVENTS_DURING_G2_M_TRANSITION	REACTOME_CYCLIN_A_B1_ASSOCIATED_EVENTS_DURING_G2_M_TRANSITION		15	0.42514	1.04767	0.388088	0.508508	1	3493	tags=40%, list=15%, signal=47%
RIZ_ERYTHROID_DIFFERENTIATION_12HR	RIZ_ERYTHROID_DIFFERENTIATION_12HR		42	0.334338	1.04711	0.358594	0.509548	1	4858	tags=36%, list=21%, signal=45%
REACTOME_GABA_SYNTHESIS_RELEASE_REUPTAKE_AND_DEGRADATION	REACTOME_GABA_SYNTHESIS_RELEASE_REUPTAKE_AND_DEGRADATION		17	0.413808	1.04684	0.38698	0.509884	1	2984	tags=29%, list=13%, signal=34%
RICKMAN_TUMOR_DIFFERENTIATED_MODERATELY_VS_POORLY_UP	RICKMAN_TUMOR_DIFFERENTIATED_MODERATELY_VS_POORLY_UP		111	0.281795	1.04681	0.343448	0.509634	1	3436	tags=24%, list=15%, signal=28%
REACTOME_TRAFFICKING_OF_AMPA_RECEPTORS	REACTOME_TRAFFICKING_OF_AMPA_RECEPTORS		26	0.371481	1.04657	0.368159	0.509904	1	1599	tags=19%, list=7%, signal=21%
LU_IL4_SIGNALING	LU_IL4_SIGNALING		88	0.291907	1.04654	0.346292	0.509641	1	4114	tags=32%, list=18%, signal=38%
PID_TXA2PATHWAY	PID_TXA2PATHWAY		57	0.315609	1.04616	0.358727	0.510249	1	1266	tags=12%, list=5%, signal=13%
CHOW_RASSF1_TARGETS_DN	CHOW_RASSF1_TARGETS_DN		29	0.360029	1.04611	0.371368	0.510055	1	3282	tags=34%, list=14%, signal=40%
REACTOME_PROLONGED_ERK_ACTIVATION_EVENTS	REACTOME_PROLONGED_ERK_ACTIVATION_EVENTS		18	0.405403	1.04607	0.385239	0.509826	1	2985	tags=33%, list=13%, signal=38%
SCHAEFFER_PROSTATE_DEVELOPMENT_6HR_UP	SCHAEFFER_PROSTATE_DEVELOPMENT_6HR_UP		154	0.269523	1.04549	0.321302	0.510905	1	3741	tags=24%, list=16%, signal=28%
HAHTOLA_SEZARY_SYNDROM_UP	HAHTOLA_SEZARY_SYNDROM_UP		85	0.292788	1.04482	0.355128	0.512246	1	5095	tags=40%, list=22%, signal=51%
ACEVEDO_LIVER_TUMOR_VS_NORMAL_ADJACENT_TISSUE_DN	ACEVEDO_LIVER_TUMOR_VS_NORMAL_ADJACENT_TISSUE_DN		234	0.255564	1.04472	0.301615	0.51215	1	5120	tags=30%, list=22%, signal=38%
AMIT_EGF_RESPONSE_60_HELA	AMIT_EGF_RESPONSE_60_HELA		44	0.330897	1.04401	0.373894	0.513586	1	612	tags=9%, list=3%, signal=9%
PID_P75_NTR_PATHWAY	PID_P75_NTR_PATHWAY		66	0.304783	1.0439	0.360045	0.513526	1	4587	tags=29%, list=20%, signal=36%
DORMOY_ELAVL1_TARGETS	DORMOY_ELAVL1_TARGETS		16	0.418493	1.04388	0.391509	0.513245	1	4528	tags=50%, list=19%, signal=62%
CHESLER_BRAIN_HIGHEST_GENETIC_VARIANCE	CHESLER_BRAIN_HIGHEST_GENETIC_VARIANCE		31	0.355962	1.04378	0.379567	0.513186	1	2448	tags=23%, list=10%, signal=25%
REACTOME_METABOLISM_OF_POLYAMINES	REACTOME_METABOLISM_OF_POLYAMINES		15	0.424238	1.04279	0.396929	0.515285	1	3954	tags=33%, list=17%, signal=40%
HOFFMANN_SMALL_PRE_BII_TO_IMMATURE_B_LYMPHOCYTE_UP	HOFFMANN_SMALL_PRE_BII_TO_IMMATURE_B_LYMPHOCYTE_UP		63	0.307248	1.04272	0.358179	0.515145	1	3102	tags=24%, list=13%, signal=27%
SMIRNOV_RESPONSE_TO_IR_6HR_DN	SMIRNOV_RESPONSE_TO_IR_6HR_DN		101	0.28411	1.04262	0.344527	0.515066	1	5563	tags=39%, list=24%, signal=50%
CORRE_MULTIPLE_MYELOMA_DN	CORRE_MULTIPLE_MYELOMA_DN		57	0.311327	1.04236	0.361848	0.515386	1	3687	tags=28%, list=16%, signal=33%
REACTOME_LAGGING_STRAND_SYNTHESIS	REACTOME_LAGGING_STRAND_SYNTHESIS		19	0.396355	1.04201	0.381684	0.515916	1	3619	tags=32%, list=15%, signal=37%
REACTOME_DEADENYLATION_OF_MRNA	REACTOME_DEADENYLATION_OF_MRNA		18	0.401661	1.04192	0.399788	0.515819	1	7688	tags=61%, list=33%, signal=91%
YAGI_AML_WITH_T_9_11_TRANSLOCATION	YAGI_AML_WITH_T_9_11_TRANSLOCATION		121	0.277286	1.0419	0.339052	0.515555	1	4988	tags=31%, list=21%, signal=39%
REACTOME_G_PROTEIN_ACTIVATION	REACTOME_G_PROTEIN_ACTIVATION		27	0.366412	1.04168	0.387962	0.515762	1	3419	tags=33%, list=15%, signal=39%
KEGG_RENAL_CELL_CARCINOMA	KEGG_RENAL_CELL_CARCINOMA		68	0.30266	1.04144	0.362127	0.516035	1	3476	tags=29%, list=15%, signal=34%
PID_RB_1PATHWAY	PID_RB_1PATHWAY		63	0.309366	1.04144	0.376973	0.515727	1	3767	tags=22%, list=16%, signal=26%
SESTO_RESPONSE_TO_UV_C3	SESTO_RESPONSE_TO_UV_C3		20	0.390763	1.04038	0.394675	0.518011	1	2765	tags=30%, list=12%, signal=34%
NIKOLSKY_BREAST_CANCER_20Q12_Q13_AMPLICON	NIKOLSKY_BREAST_CANCER_20Q12_Q13_AMPLICON		118	0.277816	1.04007	0.347728	0.518483	1	3541	tags=21%, list=15%, signal=25%
LASTOWSKA_NEUROBLASTOMA_COPY_NUMBER_UP	LASTOWSKA_NEUROBLASTOMA_COPY_NUMBER_UP		165	0.264799	1.03963	0.340964	0.519232	1	5350	tags=36%, list=23%, signal=46%
BAELDE_DIABETIC_NEPHROPATHY_UP	BAELDE_DIABETIC_NEPHROPATHY_UP		75	0.296867	1.03928	0.364514	0.519774	1	4202	tags=32%, list=18%, signal=39%
GAUSSMANN_MLL_AF4_FUSION_TARGETS_A_DN	GAUSSMANN_MLL_AF4_FUSION_TARGETS_A_DN		82	0.293735	1.03927	0.360529	0.519474	1	1717	tags=18%, list=7%, signal=20%
BIOCARTA_CALCINEURIN_PATHWAY	BIOCARTA_CALCINEURIN_PATHWAY		18	0.402003	1.03903	0.393199	0.519753	1	1953	tags=33%, list=8%, signal=36%
LEIN_OLIGODENDROCYTE_MARKERS	LEIN_OLIGODENDROCYTE_MARKERS		67	0.303953	1.03859	0.370738	0.520517	1	5018	tags=37%, list=21%, signal=47%
KEGG_P53_SIGNALING_PATHWAY	KEGG_P53_SIGNALING_PATHWAY		62	0.307191	1.03834	0.370175	0.520835	1	209	tags=6%, list=1%, signal=6%
YAO_TEMPORAL_RESPONSE_TO_PROGESTERONE_CLUSTER_8	YAO_TEMPORAL_RESPONSE_TO_PROGESTERONE_CLUSTER_8		46	0.325305	1.0383	0.368872	0.5206	1	2529	tags=20%, list=11%, signal=22%
PID_ERBB1_DOWNSTREAM_PATHWAY	PID_ERBB1_DOWNSTREAM_PATHWAY		103	0.283361	1.03826	0.359441	0.520384	1	4328	tags=28%, list=18%, signal=34%
IKEDA_MIR1_TARGETS_UP	IKEDA_MIR1_TARGETS_UP		53	0.31695	1.03815	0.371806	0.520322	1	3805	tags=28%, list=16%, signal=34%
REACTOME_PRE_NOTCH_EXPRESSION_AND_PROCESSING	REACTOME_PRE_NOTCH_EXPRESSION_AND_PROCESSING		41	0.33516	1.03809	0.378028	0.520159	1	3278	tags=22%, list=14%, signal=25%
CREIGHTON_ENDOCRINE_THERAPY_RESISTANCE_2	CREIGHTON_ENDOCRINE_THERAPY_RESISTANCE_2		337	0.244792	1.03772	0.309187	0.520728	1	4404	tags=25%, list=19%, signal=31%
HUNSBERGER_EXERCISE_REGULATED_GENES	HUNSBERGER_EXERCISE_REGULATED_GENES		31	0.35151	1.03627	0.386821	0.524024	1	2450	tags=23%, list=10%, signal=25%
MARCHINI_TRABECTEDIN_RESISTANCE_DN	MARCHINI_TRABECTEDIN_RESISTANCE_DN		46	0.323284	1.0361	0.38116	0.52413	1	3050	tags=26%, list=13%, signal=30%
KEGG_HOMOLOGOUS_RECOMBINATION	KEGG_HOMOLOGOUS_RECOMBINATION		27	0.36317	1.03595	0.386569	0.524157	1	4538	tags=33%, list=19%, signal=41%
REACTOME_DIABETES_PATHWAYS	REACTOME_DIABETES_PATHWAYS		121	0.274127	1.03582	0.35666	0.524167	1	4206	tags=29%, list=18%, signal=35%
GHANDHI_DIRECT_IRRADIATION_DN	GHANDHI_DIRECT_IRRADIATION_DN		30	0.354958	1.03514	0.393486	0.525531	1	3736	tags=40%, list=16%, signal=48%
REACTOME_OPIOID_SIGNALLING	REACTOME_OPIOID_SIGNALLING		76	0.294677	1.03459	0.374971	0.526599	1	3772	tags=30%, list=16%, signal=36%
BLALOCK_ALZHEIMERS_DISEASE_INCIPIENT_UP	BLALOCK_ALZHEIMERS_DISEASE_INCIPIENT_UP		347	0.242284	1.03415	0.318948	0.527363	1	3716	tags=23%, list=16%, signal=27%
PEDERSEN_METASTASIS_BY_ERBB2_ISOFORM_4	PEDERSEN_METASTASIS_BY_ERBB2_ISOFORM_4		95	0.285215	1.03404	0.368577	0.527296	1	4522	tags=27%, list=19%, signal=34%
REACTOME_SYNTHESIS_OF_PA	REACTOME_SYNTHESIS_OF_PA		27	0.361085	1.03402	0.396161	0.527037	1	5746	tags=44%, list=25%, signal=59%
BOHN_PRIMARY_IMMUNODEFICIENCY_SYNDROM_DN	BOHN_PRIMARY_IMMUNODEFICIENCY_SYNDROM_DN		37	0.339927	1.03393	0.393967	0.526936	1	3409	tags=27%, list=15%, signal=32%
BREDEMEYER_RAG_SIGNALING_VIA_ATM_NOT_VIA_NFKB_UP	BREDEMEYER_RAG_SIGNALING_VIA_ATM_NOT_VIA_NFKB_UP		44	0.326891	1.03333	0.384615	0.528103	1	2940	tags=30%, list=13%, signal=34%
NADERI_BREAST_CANCER_PROGNOSIS_DN	NADERI_BREAST_CANCER_PROGNOSIS_DN		18	0.397738	1.03308	0.404367	0.528418	1	888	tags=22%, list=4%, signal=23%
SANDERSON_PPARA_TARGETS	SANDERSON_PPARA_TARGETS		15	0.41799	1.03284	0.40524	0.528698	1	1651	tags=27%, list=7%, signal=29%
CLASPER_LYMPHATIC_VESSELS_DURING_METASTASIS_UP	CLASPER_LYMPHATIC_VESSELS_DURING_METASTASIS_UP		19	0.392801	1.03216	0.407628	0.530065	1	1547	tags=16%, list=7%, signal=17%
LINSLEY_MIR16_TARGETS	LINSLEY_MIR16_TARGETS		191	0.258474	1.03153	0.351996	0.531308	1	3818	tags=25%, list=16%, signal=29%
LASTOWSKA_COAMPLIFIED_WITH_MYCN	LASTOWSKA_COAMPLIFIED_WITH_MYCN		38	0.333941	1.03093	0.38943	0.532513	1	1664	tags=18%, list=7%, signal=20%
BAE_BRCA1_TARGETS_DN	BAE_BRCA1_TARGETS_DN		30	0.352519	1.03054	0.393735	0.533155	1	4695	tags=43%, list=20%, signal=54%
KAMMINGA_SENESCENCE	KAMMINGA_SENESCENCE		37	0.336601	1.03027	0.394281	0.53352	1	5578	tags=49%, list=24%, signal=64%
REACTOME_POST_TRANSLATIONAL_PROTEIN_MODIFICATION	REACTOME_POST_TRANSLATIONAL_PROTEIN_MODIFICATION		167	0.26233	1.03004	0.359532	0.533765	1	5144	tags=33%, list=22%, signal=42%
SU_TESTIS	SU_TESTIS		69	0.298485	1.02986	0.384907	0.533895	1	4046	tags=28%, list=17%, signal=33%
LI_PROSTATE_CANCER_EPIGENETIC	LI_PROSTATE_CANCER_EPIGENETIC		29	0.356391	1.0298	0.406591	0.533713	1	5346	tags=45%, list=23%, signal=58%
REACTOME_SIGNALING_BY_NOTCH	REACTOME_SIGNALING_BY_NOTCH		97	0.283678	1.0298	0.386099	0.533389	1	3278	tags=20%, list=14%, signal=23%
RIZ_ERYTHROID_DIFFERENTIATION_CCNE1	RIZ_ERYTHROID_DIFFERENTIATION_CCNE1		39	0.33426	1.02972	0.401057	0.533263	1	4357	tags=36%, list=19%, signal=44%
MACLACHLAN_BRCA1_TARGETS_DN	MACLACHLAN_BRCA1_TARGETS_DN		15	0.42128	1.02927	0.413671	0.534053	1	7734	tags=73%, list=33%, signal=109%
SMITH_LIVER_CANCER	SMITH_LIVER_CANCER		42	0.327465	1.02797	0.392118	0.536982	1	2951	tags=33%, list=13%, signal=38%
CHIANG_LIVER_CANCER_SUBCLASS_CTNNB1_UP	CHIANG_LIVER_CANCER_SUBCLASS_CTNNB1_UP		152	0.264352	1.02764	0.375232	0.537508	1	2961	tags=19%, list=13%, signal=22%
LEIN_LOCALIZED_TO_PROXIMAL_DENDRITES	LEIN_LOCALIZED_TO_PROXIMAL_DENDRITES		35	0.340697	1.02756	0.401691	0.537379	1	4367	tags=40%, list=19%, signal=49%
LEE_AGING_NEOCORTEX_UP	LEE_AGING_NEOCORTEX_UP		82	0.289648	1.02736	0.382564	0.537548	1	4479	tags=32%, list=19%, signal=39%
KEGG_RIBOFLAVIN_METABOLISM	KEGG_RIBOFLAVIN_METABOLISM		16	0.4077	1.0271	0.412685	0.537888	1	2906	tags=38%, list=12%, signal=43%
BILANGES_RAPAMYCIN_SENSITIVE_GENES	BILANGES_RAPAMYCIN_SENSITIVE_GENES		37	0.336674	1.02695	0.3994	0.537933	1	5068	tags=35%, list=22%, signal=45%
NIELSEN_SYNOVIAL_SARCOMA_DN	NIELSEN_SYNOVIAL_SARCOMA_DN		18	0.397678	1.02673	0.41526	0.538167	1	5051	tags=56%, list=22%, signal=71%
BURTON_ADIPOGENESIS_7	BURTON_ADIPOGENESIS_7		49	0.316069	1.02633	0.4044	0.538834	1	1876	tags=18%, list=8%, signal=20%
BIOCARTA_G1_PATHWAY	BIOCARTA_G1_PATHWAY		27	0.360664	1.02613	0.411879	0.538998	1	2361	tags=15%, list=10%, signal=16%
RIZ_ERYTHROID_DIFFERENTIATION_APOBEC2	RIZ_ERYTHROID_DIFFERENTIATION_APOBEC2		25	0.367344	1.02577	0.407352	0.53959	1	1263	tags=28%, list=5%, signal=30%
LINDGREN_BLADDER_CANCER_CLUSTER_2A_DN	LINDGREN_BLADDER_CANCER_CLUSTER_2A_DN		119	0.272844	1.02556	0.387997	0.539791	1	4327	tags=31%, list=18%, signal=38%
WARTERS_IR_RESPONSE_5GY	WARTERS_IR_RESPONSE_5GY		37	0.33782	1.0254	0.40103	0.539864	1	2491	tags=22%, list=11%, signal=24%
BOYLAN_MULTIPLE_MYELOMA_C_D_UP	BOYLAN_MULTIPLE_MYELOMA_C_D_UP		128	0.270133	1.02402	0.38559	0.54301	1	5049	tags=34%, list=22%, signal=44%
BIOCARTA_ACTINY_PATHWAY	BIOCARTA_ACTINY_PATHWAY		20	0.387245	1.02395	0.411302	0.542856	1	5715	tags=55%, list=24%, signal=73%
KEGG_INTESTINAL_IMMUNE_NETWORK_FOR_IGA_PRODUCTION	KEGG_INTESTINAL_IMMUNE_NETWORK_FOR_IGA_PRODUCTION		32	0.345259	1.02368	0.407503	0.54323	1	7610	tags=53%, list=32%, signal=79%
PACHER_TARGETS_OF_IGF1_AND_IGF2_UP	PACHER_TARGETS_OF_IGF1_AND_IGF2_UP		35	0.339636	1.02285	0.408639	0.545009	1	1817	tags=17%, list=8%, signal=19%
KIM_HYPOXIA	KIM_HYPOXIA		25	0.365196	1.02239	0.41238	0.545862	1	3886	tags=36%, list=17%, signal=43%
FARMER_BREAST_CANCER_APOCRINE_VS_BASAL	FARMER_BREAST_CANCER_APOCRINE_VS_BASAL		295	0.244358	1.02238	0.36012	0.545557	1	4283	tags=25%, list=18%, signal=30%
BENPORATH_ES_1	BENPORATH_ES_1		353	0.24083	1.02195	0.361517	0.546312	1	5230	tags=30%, list=22%, signal=38%
GENTILE_UV_HIGH_DOSE_UP	GENTILE_UV_HIGH_DOSE_UP		23	0.370693	1.02184	0.416432	0.546259	1	3172	tags=26%, list=14%, signal=30%
JI_RESPONSE_TO_FSH_UP	JI_RESPONSE_TO_FSH_UP		63	0.301608	1.02096	0.405542	0.548168	1	5029	tags=37%, list=21%, signal=46%
REACTOME_INTEGRATION_OF_ENERGY_METABOLISM	REACTOME_INTEGRATION_OF_ENERGY_METABOLISM		113	0.274405	1.02068	0.383827	0.548553	1	3932	tags=30%, list=17%, signal=36%
MARTIN_INTERACT_WITH_HDAC	MARTIN_INTERACT_WITH_HDAC		43	0.322436	1.02061	0.409408	0.548397	1	4092	tags=30%, list=17%, signal=37%
REACTOME_BIOLOGICAL_OXIDATIONS	REACTOME_BIOLOGICAL_OXIDATIONS		94	0.282818	1.02039	0.394899	0.548618	1	3478	tags=21%, list=15%, signal=25%
BERNARD_PPAPDC1B_TARGETS_DN	BERNARD_PPAPDC1B_TARGETS_DN		50	0.313983	1.01902	0.400569	0.551777	1	3456	tags=28%, list=15%, signal=33%
LEIN_CHOROID_PLEXUS_MARKERS	LEIN_CHOROID_PLEXUS_MARKERS		95	0.280533	1.01799	0.401774	0.554039	1	2374	tags=17%, list=10%, signal=19%
HOWLIN_CITED1_TARGETS_1_DN	HOWLIN_CITED1_TARGETS_1_DN		33	0.340465	1.01784	0.417891	0.554095	1	284	tags=6%, list=1%, signal=6%
JUBAN_TARGETS_OF_SPI1_AND_FLI1_UP	JUBAN_TARGETS_OF_SPI1_AND_FLI1_UP		103	0.277563	1.01775	0.399406	0.553998	1	5324	tags=37%, list=23%, signal=48%
SENESE_HDAC3_TARGETS_UP	SENESE_HDAC3_TARGETS_UP		443	0.23368	1.01714	0.37115	0.555222	1	3888	tags=22%, list=17%, signal=26%
KEGG_LEISHMANIA_INFECTION	KEGG_LEISHMANIA_INFECTION		52	0.311095	1.01625	0.410619	0.557181	1	948	tags=12%, list=4%, signal=12%
REACTOME_GLYCOSPHINGOLIPID_METABOLISM	REACTOME_GLYCOSPHINGOLIPID_METABOLISM		32	0.343217	1.01615	0.421868	0.557098	1	5788	tags=38%, list=25%, signal=50%
HOLLEMAN_ASPARAGINASE_RESISTANCE_ALL_UP	HOLLEMAN_ASPARAGINASE_RESISTANCE_ALL_UP		20	0.38265	1.01511	0.43257	0.559451	1	4665	tags=35%, list=20%, signal=44%
RICKMAN_METASTASIS_DN	RICKMAN_METASTASIS_DN		229	0.248678	1.01467	0.393191	0.560235	1	3669	tags=25%, list=16%, signal=30%
PHONG_TNF_RESPONSE_NOT_VIA_P38	PHONG_TNF_RESPONSE_NOT_VIA_P38		317	0.240495	1.01457	0.395685	0.560148	1	1003	tags=11%, list=4%, signal=11%
DEBIASI_APOPTOSIS_BY_REOVIRUS_INFECTION_DN	DEBIASI_APOPTOSIS_BY_REOVIRUS_INFECTION_DN		273	0.244145	1.01456	0.396919	0.559845	1	4415	tags=28%, list=19%, signal=34%
KEGG_LYSINE_DEGRADATION	KEGG_LYSINE_DEGRADATION		44	0.319029	1.01348	0.420534	0.562304	1	3807	tags=23%, list=16%, signal=27%
KAMIKUBO_MYELOID_MN1_NETWORK	KAMIKUBO_MYELOID_MN1_NETWORK		19	0.385801	1.01297	0.424454	0.563266	1	1876	tags=21%, list=8%, signal=23%
CHEN_ETV5_TARGETS_TESTIS	CHEN_ETV5_TARGETS_TESTIS		21	0.379014	1.01236	0.430861	0.564524	1	4986	tags=43%, list=21%, signal=54%
BREDEMEYER_RAG_SIGNALING_NOT_VIA_ATM_DN	BREDEMEYER_RAG_SIGNALING_NOT_VIA_ATM_DN		53	0.307792	1.01156	0.41843	0.566232	1	1402	tags=13%, list=6%, signal=14%
STANELLE_E2F1_TARGETS	STANELLE_E2F1_TARGETS		26	0.358517	1.01095	0.430917	0.567468	1	143	tags=8%, list=1%, signal=8%
ACOSTA_PROLIFERATION_INDEPENDENT_MYC_TARGETS_DN	ACOSTA_PROLIFERATION_INDEPENDENT_MYC_TARGETS_DN		104	0.274816	1.01092	0.419584	0.567208	1	3236	tags=24%, list=14%, signal=28%
MARTORIATI_MDM4_TARGETS_FETAL_LIVER_DN	MARTORIATI_MDM4_TARGETS_FETAL_LIVER_DN		484	0.230929	1.01035	0.397727	0.568358	1	5102	tags=27%, list=22%, signal=34%
TURASHVILI_BREAST_NORMAL_DUCTAL_VS_LOBULAR_UP	TURASHVILI_BREAST_NORMAL_DUCTAL_VS_LOBULAR_UP		57	0.303797	1.01032	0.421241	0.568086	1	4184	tags=30%, list=18%, signal=36%
SCIAN_INVERSED_TARGETS_OF_TP53_AND_TP73_DN	SCIAN_INVERSED_TARGETS_OF_TP53_AND_TP73_DN		28	0.35041	1.00957	0.437767	0.569683	1	3180	tags=21%, list=14%, signal=25%
GENTILE_RESPONSE_CLUSTER_D3	GENTILE_RESPONSE_CLUSTER_D3		59	0.302727	1.00948	0.423503	0.569582	1	3759	tags=27%, list=16%, signal=32%
BIOCARTA_NO1_PATHWAY	BIOCARTA_NO1_PATHWAY		29	0.348601	1.00926	0.42885	0.569803	1	3503	tags=31%, list=15%, signal=36%
YAGI_AML_WITH_T_8_21_TRANSLOCATION	YAGI_AML_WITH_T_8_21_TRANSLOCATION		331	0.238194	1.0088	0.411018	0.570688	1	3753	tags=22%, list=16%, signal=26%
KEGG_ENDOMETRIAL_CANCER	KEGG_ENDOMETRIAL_CANCER		50	0.30901	1.00861	0.422837	0.570833	1	2173	tags=14%, list=9%, signal=15%
DAVICIONI_PAX_FOXO1_SIGNATURE_IN_ARMS_DN	DAVICIONI_PAX_FOXO1_SIGNATURE_IN_ARMS_DN		20	0.381475	1.00839	0.432779	0.571082	1	5387	tags=35%, list=23%, signal=45%
BIOCARTA_GH_PATHWAY	BIOCARTA_GH_PATHWAY		25	0.361199	1.00802	0.438157	0.571715	1	1239	tags=16%, list=5%, signal=17%
TERAO_AOX4_TARGETS_SKIN_DN	TERAO_AOX4_TARGETS_SKIN_DN		20	0.382218	1.00729	0.431193	0.573263	1	789	tags=15%, list=3%, signal=16%
ONDER_CDH1_TARGETS_3_DN	ONDER_CDH1_TARGETS_3_DN		49	0.308958	1.00714	0.427733	0.573314	1	1843	tags=12%, list=8%, signal=13%
ZHAN_MULTIPLE_MYELOMA_CD1_AND_CD2_UP	ZHAN_MULTIPLE_MYELOMA_CD1_AND_CD2_UP		76	0.286048	1.00669	0.430969	0.574119	1	3886	tags=28%, list=17%, signal=33%
REACTOME_G_ALPHA1213_SIGNALLING_EVENTS	REACTOME_G_ALPHA1213_SIGNALLING_EVENTS		73	0.289679	1.00657	0.422222	0.574078	1	3953	tags=27%, list=17%, signal=33%
KERLEY_RESPONSE_TO_CISPLATIN_UP	KERLEY_RESPONSE_TO_CISPLATIN_UP		38	0.329046	1.00657	0.431355	0.57376	1	1146	tags=18%, list=5%, signal=19%
MACAEVA_PBMC_RESPONSE_TO_IR	MACAEVA_PBMC_RESPONSE_TO_IR		83	0.2825	1.00619	0.426918	0.574394	1	4436	tags=30%, list=19%, signal=37%
MATTIOLI_MULTIPLE_MYELOMA_WITH_14Q32_TRANSLOCATIONS	MATTIOLI_MULTIPLE_MYELOMA_WITH_14Q32_TRANSLOCATIONS		34	0.335582	1.00561	0.443594	0.575592	1	2635	tags=18%, list=11%, signal=20%
LEE_NEURAL_CREST_STEM_CELL_UP	LEE_NEURAL_CREST_STEM_CELL_UP		140	0.261688	1.00553	0.428039	0.57546	1	1333	tags=12%, list=6%, signal=13%
KYNG_WERNER_SYNDROM_AND_NORMAL_AGING_UP	KYNG_WERNER_SYNDROM_AND_NORMAL_AGING_UP		84	0.281291	1.00538	0.43023	0.5755	1	3217	tags=20%, list=14%, signal=23%
BIOCARTA_G2_PATHWAY	BIOCARTA_G2_PATHWAY		23	0.365814	1.00492	0.435599	0.576364	1	2204	tags=26%, list=9%, signal=29%
LEE_RECENT_THYMIC_EMIGRANT	LEE_RECENT_THYMIC_EMIGRANT		192	0.250601	1.00427	0.423168	0.577703	1	4842	tags=33%, list=21%, signal=41%
IWANAGA_CARCINOGENESIS_BY_KRAS_UP	IWANAGA_CARCINOGENESIS_BY_KRAS_UP		153	0.257963	1.00413	0.433803	0.57774	1	3036	tags=22%, list=13%, signal=25%
KASLER_HDAC7_TARGETS_2_DN	KASLER_HDAC7_TARGETS_2_DN		31	0.33987	1.00384	0.440173	0.578156	1	3521	tags=32%, list=15%, signal=38%
CHEN_LIVER_METABOLISM_QTL_CIS	CHEN_LIVER_METABOLISM_QTL_CIS		84	0.282791	1.00364	0.435373	0.578335	1	3513	tags=25%, list=15%, signal=29%
ZHANG_RESPONSE_TO_CANTHARIDIN_UP	ZHANG_RESPONSE_TO_CANTHARIDIN_UP		19	0.382286	1.00346	0.440598	0.578473	1	1578	tags=21%, list=7%, signal=23%
GHO_ATF5_TARGETS_DN	GHO_ATF5_TARGETS_DN		15	0.408946	1.00272	0.452029	0.580037	1	1952	tags=27%, list=8%, signal=29%
TAKAO_RESPONSE_TO_UVB_RADIATION_DN	TAKAO_RESPONSE_TO_UVB_RADIATION_DN		93	0.278172	1.00236	0.430505	0.580646	1	3249	tags=25%, list=14%, signal=29%
REACTOME_TRIF_MEDIATED_TLR3_SIGNALING	REACTOME_TRIF_MEDIATED_TLR3_SIGNALING		71	0.289221	1.00232	0.439663	0.580431	1	2204	tags=15%, list=9%, signal=17%
ZHAN_MULTIPLE_MYELOMA_CD2_DN	ZHAN_MULTIPLE_MYELOMA_CD2_DN		43	0.319507	1.00204	0.436282	0.580824	1	2655	tags=19%, list=11%, signal=21%
SEIDEN_MET_SIGNALING	SEIDEN_MET_SIGNALING		18	0.385801	1.0017	0.445995	0.58135	1	4426	tags=50%, list=19%, signal=62%
CHEN_ETV5_TARGETS_SERTOLI	CHEN_ETV5_TARGETS_SERTOLI		17	0.393569	1.00146	0.4473	0.581653	1	1150	tags=24%, list=5%, signal=25%
DACOSTA_UV_RESPONSE_VIA_ERCC3_COMMON_UP	DACOSTA_UV_RESPONSE_VIA_ERCC3_COMMON_UP		65	0.294581	1.00144	0.439052	0.58135	1	2892	tags=25%, list=12%, signal=28%
GRADE_COLON_CANCER_DN	GRADE_COLON_CANCER_DN		27	0.351809	1.00056	0.447276	0.58333	1	1924	tags=22%, list=8%, signal=24%
REACTOME_G0_AND_EARLY_G1	REACTOME_G0_AND_EARLY_G1		23	0.366086	1.00036	0.447533	0.583499	1	2361	tags=22%, list=10%, signal=24%
NIKOLSKY_BREAST_CANCER_22Q13_AMPLICON	NIKOLSKY_BREAST_CANCER_22Q13_AMPLICON		15	0.406264	1.00004	0.452822	0.584002	1	2052	tags=20%, list=9%, signal=22%
REACTOME_ANTIGEN_PRESENTATION_FOLDING_ASSEMBLY_AND_PEPTIDE_LOADING_OF_CLASS_I_MHC	REACTOME_ANTIGEN_PRESENTATION_FOLDING_ASSEMBLY_AND_PEPTIDE_LOADING_OF_CLASS_I_MHC		15	0.405429	0.999825	0.455047	0.58421	1	3080	tags=33%, list=13%, signal=38%
GARGALOVIC_RESPONSE_TO_OXIDIZED_PHOSPHOLIPIDS_GREY_UP	GARGALOVIC_RESPONSE_TO_OXIDIZED_PHOSPHOLIPIDS_GREY_UP		15	0.403091	0.999313	0.448962	0.585218	1	100	tags=13%, list=0%, signal=13%
BIOCARTA_CERAMIDE_PATHWAY	BIOCARTA_CERAMIDE_PATHWAY		22	0.369742	0.999199	0.445949	0.585162	1	3829	tags=27%, list=16%, signal=33%
GARGALOVIC_RESPONSE_TO_OXIDIZED_PHOSPHOLIPIDS_TURQUOISE_UP	GARGALOVIC_RESPONSE_TO_OXIDIZED_PHOSPHOLIPIDS_TURQUOISE_UP		69	0.289206	0.998551	0.444716	0.586542	1	993	tags=13%, list=4%, signal=14%
CHIBA_RESPONSE_TO_TSA	CHIBA_RESPONSE_TO_TSA		46	0.312596	0.998464	0.443934	0.586431	1	2023	tags=20%, list=9%, signal=21%
ELVIDGE_HYPOXIA_BY_DMOG_DN	ELVIDGE_HYPOXIA_BY_DMOG_DN		57	0.298155	0.997624	0.44099	0.588279	1	5342	tags=39%, list=23%, signal=50%
QI_HYPOXIA	QI_HYPOXIA		131	0.262391	0.997044	0.452198	0.589462	1	3744	tags=26%, list=16%, signal=31%
OUYANG_PROSTATE_CANCER_MARKERS	OUYANG_PROSTATE_CANCER_MARKERS		19	0.381339	0.996258	0.458324	0.591184	1	1855	tags=32%, list=8%, signal=34%
PID_MYC_PATHWAY	PID_MYC_PATHWAY		24	0.358852	0.995902	0.444609	0.591775	1	3663	tags=38%, list=16%, signal=44%
BIOCARTA_TALL1_PATHWAY	BIOCARTA_TALL1_PATHWAY		15	0.401308	0.99581	0.449979	0.591673	1	6274	tags=40%, list=27%, signal=55%
FOSTER_KDM1A_TARGETS_DN	FOSTER_KDM1A_TARGETS_DN		195	0.247911	0.994877	0.444022	0.593786	1	5235	tags=32%, list=22%, signal=41%
MEDINA_SMARCA4_TARGETS	MEDINA_SMARCA4_TARGETS		37	0.327314	0.994375	0.458479	0.594773	1	2097	tags=24%, list=9%, signal=27%
DAVICIONI_PAX_FOXO1_SIGNATURE_IN_ARMS_UP	DAVICIONI_PAX_FOXO1_SIGNATURE_IN_ARMS_UP		56	0.299601	0.994359	0.457193	0.594474	1	2589	tags=21%, list=11%, signal=24%
PID_PDGFRA_PATHWAY	PID_PDGFRA_PATHWAY		22	0.368124	0.992851	0.45602	0.59815	1	4238	tags=41%, list=18%, signal=50%
BRACHAT_RESPONSE_TO_CAMPTOTHECIN_UP	BRACHAT_RESPONSE_TO_CAMPTOTHECIN_UP		23	0.359306	0.992789	0.45519	0.597962	1	2114	tags=30%, list=9%, signal=33%
FONTAINE_PAPILLARY_THYROID_CARCINOMA_UP	FONTAINE_PAPILLARY_THYROID_CARCINOMA_UP		58	0.296821	0.992787	0.459013	0.597621	1	4092	tags=34%, list=17%, signal=42%
WANG_LMO4_TARGETS_DN	WANG_LMO4_TARGETS_DN		314	0.235482	0.992773	0.470588	0.597309	1	4945	tags=30%, list=21%, signal=38%
SMIRNOV_RESPONSE_TO_IR_2HR_DN	SMIRNOV_RESPONSE_TO_IR_2HR_DN		48	0.307141	0.992462	0.451469	0.597792	1	1372	tags=17%, list=6%, signal=18%
LU_EZH2_TARGETS_DN	LU_EZH2_TARGETS_DN		339	0.234387	0.992353	0.468063	0.597729	1	4092	tags=25%, list=17%, signal=30%
KEGG_ARGININE_AND_PROLINE_METABOLISM	KEGG_ARGININE_AND_PROLINE_METABOLISM		51	0.304846	0.992139	0.461829	0.597951	1	4994	tags=33%, list=21%, signal=42%
VANTVEER_BREAST_CANCER_ESR1_UP	VANTVEER_BREAST_CANCER_ESR1_UP		150	0.255618	0.991071	0.466971	0.60042	1	5245	tags=35%, list=22%, signal=44%
MULLIGHAN_NPM1_SIGNATURE_3_DN	MULLIGHAN_NPM1_SIGNATURE_3_DN		149	0.255507	0.990884	0.462628	0.60058	1	3149	tags=26%, list=13%, signal=30%
BIOCARTA_MTOR_PATHWAY	BIOCARTA_MTOR_PATHWAY		23	0.362011	0.990162	0.461735	0.60214	1	4238	tags=35%, list=18%, signal=42%
REACTOME_PURINE_METABOLISM	REACTOME_PURINE_METABOLISM		32	0.33348	0.989579	0.461604	0.603325	1	4454	tags=44%, list=19%, signal=54%
LI_WILMS_TUMOR_VS_FETAL_KIDNEY_1_UP	LI_WILMS_TUMOR_VS_FETAL_KIDNEY_1_UP		174	0.25137	0.989288	0.472236	0.603761	1	3906	tags=26%, list=17%, signal=31%
KYNG_ENVIRONMENTAL_STRESS_RESPONSE_NOT_BY_GAMMA_IN_WS	KYNG_ENVIRONMENTAL_STRESS_RESPONSE_NOT_BY_GAMMA_IN_WS		28	0.344628	0.989202	0.459683	0.603635	1	4587	tags=32%, list=20%, signal=40%
TURASHVILI_BREAST_LOBULAR_CARCINOMA_VS_DUCTAL_NORMAL_DN	TURASHVILI_BREAST_LOBULAR_CARCINOMA_VS_DUCTAL_NORMAL_DN		84	0.277209	0.98892	0.467855	0.604044	1	2503	tags=19%, list=11%, signal=21%
KEGG_HISTIDINE_METABOLISM	KEGG_HISTIDINE_METABOLISM		28	0.343799	0.988388	0.469981	0.605116	1	5345	tags=32%, list=23%, signal=42%
PID_HDAC_CLASSIII_PATHWAY	PID_HDAC_CLASSIII_PATHWAY		24	0.356697	0.988344	0.46365	0.604893	1	2440	tags=33%, list=10%, signal=37%
SHETH_LIVER_CANCER_VS_TXNIP_LOSS_PAM2	SHETH_LIVER_CANCER_VS_TXNIP_LOSS_PAM2		145	0.255498	0.98801	0.48048	0.605424	1	2523	tags=19%, list=11%, signal=22%
LIU_COMMON_CANCER_GENES	LIU_COMMON_CANCER_GENES		63	0.29227	0.987871	0.462795	0.605442	1	3814	tags=27%, list=16%, signal=32%
PETROVA_PROX1_TARGETS_UP	PETROVA_PROX1_TARGETS_UP		27	0.346305	0.987825	0.465017	0.605215	1	4229	tags=48%, list=18%, signal=59%
HORTON_SREBF_TARGETS	HORTON_SREBF_TARGETS		23	0.35921	0.987551	0.459688	0.60561	1	6200	tags=52%, list=26%, signal=71%
NAGASHIMA_NRG1_SIGNALING_DN	NAGASHIMA_NRG1_SIGNALING_DN		47	0.306365	0.986875	0.465544	0.607069	1	4221	tags=23%, list=18%, signal=28%
BIOCARTA_HIVNEF_PATHWAY	BIOCARTA_HIVNEF_PATHWAY		56	0.296767	0.986519	0.475119	0.607675	1	4829	tags=32%, list=21%, signal=40%
BONOME_OVARIAN_CANCER_SURVIVAL_OPTIMAL_DEBULKING	BONOME_OVARIAN_CANCER_SURVIVAL_OPTIMAL_DEBULKING		215	0.24392	0.985928	0.490215	0.608886	1	3337	tags=22%, list=14%, signal=25%
OUYANG_PROSTATE_CANCER_PROGRESSION_DN	OUYANG_PROSTATE_CANCER_PROGRESSION_DN		19	0.378107	0.985921	0.461814	0.608555	1	1591	tags=21%, list=7%, signal=23%
SHEPARD_BMYB_MORPHOLINO_DN	SHEPARD_BMYB_MORPHOLINO_DN		191	0.246484	0.98569	0.485284	0.60882	1	5920	tags=36%, list=25%, signal=47%
INGA_TP53_TARGETS	INGA_TP53_TARGETS		15	0.400714	0.985116	0.47055	0.610019	1	78	tags=13%, list=0%, signal=13%
MCBRYAN_PUBERTAL_BREAST_6_7WK_UP	MCBRYAN_PUBERTAL_BREAST_6_7WK_UP		181	0.247624	0.984633	0.494079	0.610973	1	2499	tags=19%, list=11%, signal=21%
KIM_GERMINAL_CENTER_T_HELPER_UP	KIM_GERMINAL_CENTER_T_HELPER_UP		56	0.295577	0.984195	0.474043	0.611801	1	2402	tags=27%, list=10%, signal=30%
TERAO_AOX4_TARGETS_SKIN_UP	TERAO_AOX4_TARGETS_SKIN_UP		36	0.32227	0.983687	0.468002	0.612798	1	3014	tags=28%, list=13%, signal=32%
CHOW_RASSF1_TARGETS_UP	CHOW_RASSF1_TARGETS_UP		24	0.354591	0.982634	0.473002	0.615261	1	1664	tags=17%, list=7%, signal=18%
FINETTI_BREAST_CANCER_KINOME_GREEN	FINETTI_BREAST_CANCER_KINOME_GREEN		16	0.39408	0.982186	0.47399	0.616124	1	458	tags=19%, list=2%, signal=19%
MURAKAMI_UV_RESPONSE_6HR_UP	MURAKAMI_UV_RESPONSE_6HR_UP		32	0.331443	0.981719	0.474503	0.617027	1	1461	tags=16%, list=6%, signal=17%
FARMER_BREAST_CANCER_APOCRINE_VS_LUMINAL	FARMER_BREAST_CANCER_APOCRINE_VS_LUMINAL		290	0.234945	0.981105	0.512338	0.618329	1	3445	tags=20%, list=15%, signal=23%
LAMB_CCND1_TARGETS	LAMB_CCND1_TARGETS		19	0.375031	0.980952	0.47788	0.618384	1	7981	tags=68%, list=34%, signal=104%
REACTOME_REGULATION_OF_WATER_BALANCE_BY_RENAL_AQUAPORINS	REACTOME_REGULATION_OF_WATER_BALANCE_BY_RENAL_AQUAPORINS		42	0.312019	0.980326	0.473985	0.619702	1	3772	tags=29%, list=16%, signal=34%
MULLIGHAN_NPM1_MUTATED_SIGNATURE_1_UP	MULLIGHAN_NPM1_MUTATED_SIGNATURE_1_UP		242	0.238995	0.979893	0.509109	0.620503	1	5166	tags=31%, list=22%, signal=40%
REACTOME_RNA_POL_III_CHAIN_ELONGATION	REACTOME_RNA_POL_III_CHAIN_ELONGATION		17	0.38198	0.97922	0.47927	0.621941	1	5030	tags=35%, list=21%, signal=45%
WALLACE_PROSTATE_CANCER_RACE_DN	WALLACE_PROSTATE_CANCER_RACE_DN		65	0.287196	0.979158	0.480773	0.621753	1	5407	tags=35%, list=23%, signal=46%
REACTOME_LATENT_INFECTION_OF_HOMO_SAPIENS_WITH_MYCOBACTERIUM_TUBERCULOSIS	REACTOME_LATENT_INFECTION_OF_HOMO_SAPIENS_WITH_MYCOBACTERIUM_TUBERCULOSIS		30	0.336238	0.97874	0.482789	0.622497	1	3910	tags=30%, list=17%, signal=36%
HUANG_DASATINIB_RESISTANCE_DN	HUANG_DASATINIB_RESISTANCE_DN		62	0.290057	0.978291	0.489818	0.623362	1	4154	tags=32%, list=18%, signal=39%
PID_EPHB_FWD_PATHWAY	PID_EPHB_FWD_PATHWAY		38	0.318193	0.978256	0.488179	0.623105	1	4238	tags=34%, list=18%, signal=42%
REACTOME_GLUTATHIONE_CONJUGATION	REACTOME_GLUTATHIONE_CONJUGATION		22	0.361654	0.978043	0.479656	0.623311	1	4370	tags=27%, list=19%, signal=33%
DIRMEIER_LMP1_RESPONSE_LATE_UP	DIRMEIER_LMP1_RESPONSE_LATE_UP		55	0.295323	0.977732	0.485011	0.623799	1	5318	tags=36%, list=23%, signal=47%
NIELSEN_LIPOSARCOMA_UP	NIELSEN_LIPOSARCOMA_UP		17	0.382379	0.977505	0.482648	0.624055	1	4476	tags=35%, list=19%, signal=44%
MCCLUNG_COCAIN_REWARD_4WK	MCCLUNG_COCAIN_REWARD_4WK		71	0.283889	0.977338	0.496253	0.624143	1	5007	tags=31%, list=21%, signal=39%
REACTOME_ACTIVATION_OF_BH3_ONLY_PROTEINS	REACTOME_ACTIVATION_OF_BH3_ONLY_PROTEINS		15	0.396398	0.977141	0.485458	0.62432	1	4763	tags=40%, list=20%, signal=50%
PID_IL12_STAT4_PATHWAY	PID_IL12_STAT4_PATHWAY		31	0.332199	0.976222	0.481288	0.62642	1	4620	tags=29%, list=20%, signal=36%
REACTOME_GLOBAL_GENOMIC_NER_GG_NER	REACTOME_GLOBAL_GENOMIC_NER_GG_NER		32	0.329327	0.975942	0.491376	0.626807	1	3985	tags=31%, list=17%, signal=38%
MATZUK_SPERMATOGONIA	MATZUK_SPERMATOGONIA		24	0.352474	0.975714	0.488238	0.627065	1	344	tags=13%, list=1%, signal=13%
PICCALUGA_ANGIOIMMUNOBLASTIC_LYMPHOMA_DN	PICCALUGA_ANGIOIMMUNOBLASTIC_LYMPHOMA_DN		126	0.257177	0.975659	0.498377	0.626865	1	4068	tags=25%, list=17%, signal=31%
STEIN_ESR1_TARGETS	STEIN_ESR1_TARGETS		81	0.275029	0.975483	0.501818	0.626972	1	4052	tags=33%, list=17%, signal=40%
CHEN_LUNG_CANCER_SURVIVAL	CHEN_LUNG_CANCER_SURVIVAL		24	0.350547	0.975482	0.48919	0.626619	1	6137	tags=54%, list=26%, signal=73%
MILI_PSEUDOPODIA	MILI_PSEUDOPODIA		39	0.316117	0.975296	0.488696	0.626765	1	4845	tags=38%, list=21%, signal=48%
REACTOME_GAP_JUNCTION_TRAFFICKING	REACTOME_GAP_JUNCTION_TRAFFICKING		24	0.348982	0.975149	0.481969	0.626813	1	1260	tags=17%, list=5%, signal=18%
KEGG_DRUG_METABOLISM_OTHER_ENZYMES	KEGG_DRUG_METABOLISM_OTHER_ENZYMES		29	0.336361	0.974757	0.481018	0.627508	1	3844	tags=24%, list=16%, signal=29%
IZADPANAH_STEM_CELL_ADIPOSE_VS_BONE_UP	IZADPANAH_STEM_CELL_ADIPOSE_VS_BONE_UP		107	0.264596	0.97472	0.50046	0.627249	1	4703	tags=31%, list=20%, signal=38%
PETRETTO_HEART_MASS_QTL_CIS_UP	PETRETTO_HEART_MASS_QTL_CIS_UP		24	0.352728	0.974595	0.479649	0.627226	1	5170	tags=42%, list=22%, signal=53%
BIOCARTA_EDG1_PATHWAY	BIOCARTA_EDG1_PATHWAY		27	0.342589	0.97456	0.486387	0.626962	1	4238	tags=37%, list=18%, signal=45%
REACTOME_METABOLISM_OF_STEROID_HORMONES_AND_VITAMINS_A_AND_D	REACTOME_METABOLISM_OF_STEROID_HORMONES_AND_VITAMINS_A_AND_D		33	0.326559	0.974425	0.488321	0.626975	1	6907	tags=45%, list=29%, signal=64%
FISCHER_DIRECT_P53_TARGETS_META_ANALYSIS	FISCHER_DIRECT_P53_TARGETS_META_ANALYSIS		267	0.234307	0.974054	0.529953	0.627611	1	2846	tags=19%, list=12%, signal=21%
VALK_AML_CLUSTER_8	VALK_AML_CLUSTER_8		23	0.354348	0.973859	0.492081	0.627775	1	1380	tags=17%, list=6%, signal=18%
MATZUK_SPERMATOCYTE	MATZUK_SPERMATOCYTE		71	0.279827	0.973378	0.503754	0.628711	1	5782	tags=44%, list=25%, signal=58%
REACTOME_THROMBIN_SIGNALLING_THROUGH_PROTEINASE_ACTIVATED_RECEPTORS_PARS	REACTOME_THROMBIN_SIGNALLING_THROUGH_PROTEINASE_ACTIVATED_RECEPTORS_PARS		32	0.328296	0.973178	0.489329	0.628894	1	3984	tags=34%, list=17%, signal=41%
MELLMAN_TUT1_TARGETS_DN	MELLMAN_TUT1_TARGETS_DN		45	0.307257	0.97252	0.492615	0.630314	1	3458	tags=27%, list=15%, signal=31%
XU_CREBBP_TARGETS_UP	XU_CREBBP_TARGETS_UP		24	0.352204	0.972314	0.487794	0.630501	1	4915	tags=50%, list=21%, signal=63%
NOUZOVA_TRETINOIN_AND_H4_ACETYLATION	NOUZOVA_TRETINOIN_AND_H4_ACETYLATION		122	0.257219	0.972273	0.515636	0.630257	1	3120	tags=21%, list=13%, signal=24%
ROVERSI_GLIOMA_COPY_NUMBER_UP	ROVERSI_GLIOMA_COPY_NUMBER_UP		87	0.270475	0.9722	0.507875	0.630096	1	3154	tags=20%, list=13%, signal=22%
PURBEY_TARGETS_OF_CTBP1_NOT_SATB1_UP	PURBEY_TARGETS_OF_CTBP1_NOT_SATB1_UP		297	0.231584	0.971734	0.541814	0.631008	1	5054	tags=29%, list=22%, signal=36%
DUNNE_TARGETS_OF_AML1_MTG8_FUSION_UP	DUNNE_TARGETS_OF_AML1_MTG8_FUSION_UP		40	0.312192	0.97126	0.502447	0.631922	1	4114	tags=33%, list=18%, signal=39%
MONNIER_POSTRADIATION_TUMOR_ESCAPE_UP	MONNIER_POSTRADIATION_TUMOR_ESCAPE_UP		367	0.227145	0.971119	0.571801	0.631947	1	4325	tags=25%, list=18%, signal=30%
TURASHVILI_BREAST_CARCINOMA_DUCTAL_VS_LOBULAR_UP	TURASHVILI_BREAST_CARCINOMA_DUCTAL_VS_LOBULAR_UP		16	0.386827	0.969917	0.487288	0.634798	1	2455	tags=25%, list=10%, signal=28%
REACTOME_GLYCOLYSIS	REACTOME_GLYCOLYSIS		25	0.343998	0.96887	0.487882	0.637271	1	3046	tags=28%, list=13%, signal=32%
RAY_TUMORIGENESIS_BY_ERBB2_CDC25A_DN	RAY_TUMORIGENESIS_BY_ERBB2_CDC25A_DN		145	0.250732	0.968836	0.527599	0.637007	1	2406	tags=19%, list=10%, signal=21%
WEBER_METHYLATED_ICP_IN_FIBROBLAST	WEBER_METHYLATED_ICP_IN_FIBROBLAST		19	0.371744	0.968831	0.487273	0.636665	1	4100	tags=32%, list=18%, signal=38%
BOSCO_EPITHELIAL_DIFFERENTIATION_MODULE	BOSCO_EPITHELIAL_DIFFERENTIATION_MODULE		53	0.293315	0.968238	0.498095	0.637914	1	2177	tags=17%, list=9%, signal=19%
LA_MEN1_TARGETS	LA_MEN1_TARGETS		24	0.348421	0.968159	0.496544	0.637779	1	4002	tags=38%, list=17%, signal=45%
REACTOME_ACTIVATION_OF_THE_PRE_REPLICATIVE_COMPLEX	REACTOME_ACTIVATION_OF_THE_PRE_REPLICATIVE_COMPLEX		29	0.333365	0.96795	0.49498	0.637978	1	3852	tags=34%, list=16%, signal=41%
PID_AR_NONGENOMIC_PATHWAY	PID_AR_NONGENOMIC_PATHWAY		30	0.330773	0.967813	0.491992	0.638	1	5086	tags=47%, list=22%, signal=60%
MARIADASON_RESPONSE_TO_CURCUMIN_SULINDAC_7	MARIADASON_RESPONSE_TO_CURCUMIN_SULINDAC_7		15	0.395354	0.966471	0.500421	0.641264	1	4773	tags=40%, list=20%, signal=50%
WELCH_GATA1_TARGETS	WELCH_GATA1_TARGETS		19	0.370153	0.966348	0.496855	0.641242	1	2546	tags=32%, list=11%, signal=35%
GARGALOVIC_RESPONSE_TO_OXIDIZED_PHOSPHOLIPIDS_BLACK_UP	GARGALOVIC_RESPONSE_TO_OXIDIZED_PHOSPHOLIPIDS_BLACK_UP		31	0.329244	0.965971	0.499344	0.641911	1	3309	tags=32%, list=14%, signal=38%
CHANG_IMMORTALIZED_BY_HPV31_UP	CHANG_IMMORTALIZED_BY_HPV31_UP		69	0.279788	0.965913	0.504527	0.641711	1	3905	tags=29%, list=17%, signal=35%
JI_METASTASIS_REPRESSED_BY_STK11	JI_METASTASIS_REPRESSED_BY_STK11		25	0.346042	0.965305	0.502797	0.642997	1	4938	tags=40%, list=21%, signal=51%
RIGGINS_TAMOXIFEN_RESISTANCE_DN	RIGGINS_TAMOXIFEN_RESISTANCE_DN		200	0.23919	0.964095	0.555076	0.645898	1	4032	tags=25%, list=17%, signal=30%
SHIN_B_CELL_LYMPHOMA_CLUSTER_8	SHIN_B_CELL_LYMPHOMA_CLUSTER_8		34	0.322488	0.963595	0.510209	0.646894	1	3620	tags=29%, list=15%, signal=35%
PID_VEGFR1_PATHWAY	PID_VEGFR1_PATHWAY		26	0.342193	0.963366	0.502723	0.647147	1	438	tags=12%, list=2%, signal=12%
REACTOME_APOPTOTIC_CLEAVAGE_OF_CELLULAR_PROTEINS	REACTOME_APOPTOTIC_CLEAVAGE_OF_CELLULAR_PROTEINS		35	0.316748	0.963132	0.509302	0.64741	1	1781	tags=20%, list=8%, signal=22%
YAO_TEMPORAL_RESPONSE_TO_PROGESTERONE_CLUSTER_5	YAO_TEMPORAL_RESPONSE_TO_PROGESTERONE_CLUSTER_5		28	0.336136	0.962888	0.506843	0.647721	1	3977	tags=36%, list=17%, signal=43%
KEGG_PANTOTHENATE_AND_COA_BIOSYNTHESIS	KEGG_PANTOTHENATE_AND_COA_BIOSYNTHESIS		15	0.388975	0.96288	0.508825	0.647382	1	367	tags=13%, list=2%, signal=14%
REACTOME_SIGNALING_BY_TGF_BETA_RECEPTOR_COMPLEX	REACTOME_SIGNALING_BY_TGF_BETA_RECEPTOR_COMPLEX		60	0.285651	0.960776	0.520657	0.652662	1	3377	tags=22%, list=14%, signal=25%
CARD_MIR302A_TARGETS	CARD_MIR302A_TARGETS		75	0.273759	0.960403	0.537377	0.653335	1	4742	tags=31%, list=20%, signal=38%
CHEOK_RESPONSE_TO_HD_MTX_DN	CHEOK_RESPONSE_TO_HD_MTX_DN		24	0.347495	0.960157	0.50792	0.653631	1	7852	tags=63%, list=34%, signal=94%
STAEGE_EWING_FAMILY_TUMOR	STAEGE_EWING_FAMILY_TUMOR		30	0.328489	0.959625	0.511884	0.654702	1	3776	tags=20%, list=16%, signal=24%
VALK_AML_CLUSTER_9	VALK_AML_CLUSTER_9		33	0.322283	0.959615	0.513614	0.654369	1	2233	tags=24%, list=10%, signal=27%
REACTOME_SIGNALING_BY_SCF_KIT	REACTOME_SIGNALING_BY_SCF_KIT		72	0.276007	0.958396	0.532871	0.657297	1	4767	tags=31%, list=20%, signal=38%
PYEON_HPV_POSITIVE_TUMORS_UP	PYEON_HPV_POSITIVE_TUMORS_UP		75	0.274008	0.957424	0.541431	0.659555	1	3350	tags=23%, list=14%, signal=26%
KEGG_NON_SMALL_CELL_LUNG_CANCER	KEGG_NON_SMALL_CELL_LUNG_CANCER		52	0.29158	0.956199	0.533715	0.662519	1	910	tags=10%, list=4%, signal=10%
WOTTON_RUNX_TARGETS_UP	WOTTON_RUNX_TARGETS_UP		18	0.366609	0.955349	0.513473	0.664484	1	659	tags=17%, list=3%, signal=17%
HAHTOLA_CTCL_CUTANEOUS	HAHTOLA_CTCL_CUTANEOUS		22	0.351162	0.955073	0.523933	0.664876	1	2939	tags=41%, list=13%, signal=47%
LIU_VAV3_PROSTATE_CARCINOGENESIS_DN	LIU_VAV3_PROSTATE_CARCINOGENESIS_DN		16	0.379463	0.954307	0.505163	0.666587	1	3236	tags=25%, list=14%, signal=29%
REACTOME_G_ALPHA_I_SIGNALLING_EVENTS	REACTOME_G_ALPHA_I_SIGNALLING_EVENTS		178	0.239874	0.954265	0.59816	0.666341	1	3546	tags=19%, list=15%, signal=22%
ZEMBUTSU_SENSITIVITY_TO_CISPLATIN	ZEMBUTSU_SENSITIVITY_TO_CISPLATIN		19	0.364844	0.952999	0.52383	0.669421	1	5331	tags=47%, list=23%, signal=61%
REACTOME_REGULATION_OF_KIT_SIGNALING	REACTOME_REGULATION_OF_KIT_SIGNALING		15	0.385625	0.952905	0.520025	0.669313	1	5003	tags=40%, list=21%, signal=51%
TURASHVILI_BREAST_DUCTAL_CARCINOMA_VS_DUCTAL_NORMAL_UP	TURASHVILI_BREAST_DUCTAL_CARCINOMA_VS_DUCTAL_NORMAL_UP		41	0.30474	0.952859	0.534096	0.669069	1	4128	tags=29%, list=18%, signal=35%
KIM_ALL_DISORDERS_CALB1_CORR_DN	KIM_ALL_DISORDERS_CALB1_CORR_DN		33	0.319987	0.952565	0.518462	0.669508	1	2777	tags=21%, list=12%, signal=24%
LINDGREN_BLADDER_CANCER_HIGH_RECURRENCE	LINDGREN_BLADDER_CANCER_HIGH_RECURRENCE		46	0.298982	0.952436	0.534954	0.669502	1	2217	tags=24%, list=9%, signal=26%
PID_DELTA_NP63_PATHWAY	PID_DELTA_NP63_PATHWAY		46	0.299383	0.95212	0.531537	0.669995	1	1311	tags=15%, list=6%, signal=16%
RASHI_RESPONSE_TO_IONIZING_RADIATION_3	RASHI_RESPONSE_TO_IONIZING_RADIATION_3		45	0.298377	0.95034	0.542056	0.674464	1	4893	tags=33%, list=21%, signal=42%
THUM_SYSTOLIC_HEART_FAILURE_DN	THUM_SYSTOLIC_HEART_FAILURE_DN		196	0.236613	0.948465	0.601316	0.679158	1	4513	tags=28%, list=19%, signal=34%
PID_NFAT_3PATHWAY	PID_NFAT_3PATHWAY		53	0.289891	0.948187	0.541749	0.679561	1	4328	tags=32%, list=18%, signal=39%
REACTOME_AQUAPORIN_MEDIATED_TRANSPORT	REACTOME_AQUAPORIN_MEDIATED_TRANSPORT		48	0.293948	0.946761	0.540457	0.683051	1	3772	tags=27%, list=16%, signal=32%
GENTILE_UV_LOW_DOSE_UP	GENTILE_UV_LOW_DOSE_UP		25	0.339445	0.946734	0.54226	0.682752	1	2269	tags=24%, list=10%, signal=27%
REACTOME_OTHER_SEMAPHORIN_INTERACTIONS	REACTOME_OTHER_SEMAPHORIN_INTERACTIONS		15	0.384599	0.946482	0.524468	0.683048	1	3078	tags=27%, list=13%, signal=31%
DOANE_BREAST_CANCER_ESR1_UP	DOANE_BREAST_CANCER_ESR1_UP		99	0.259082	0.946282	0.58343	0.68322	1	2032	tags=15%, list=9%, signal=17%
PID_INSULIN_PATHWAY	PID_INSULIN_PATHWAY		43	0.299705	0.946175	0.544386	0.683144	1	3476	tags=23%, list=15%, signal=27%
FRASOR_TAMOXIFEN_RESPONSE_UP	FRASOR_TAMOXIFEN_RESPONSE_UP		47	0.293444	0.945759	0.54267	0.683906	1	4328	tags=30%, list=18%, signal=36%
VILIMAS_NOTCH1_TARGETS_DN	VILIMAS_NOTCH1_TARGETS_DN		20	0.357812	0.945441	0.523528	0.684404	1	945	tags=20%, list=4%, signal=21%
LIN_MELANOMA_COPY_NUMBER_DN	LIN_MELANOMA_COPY_NUMBER_DN		38	0.306512	0.945006	0.542982	0.685234	1	6326	tags=50%, list=27%, signal=68%
SHETH_LIVER_CANCER_VS_TXNIP_LOSS_PAM3	SHETH_LIVER_CANCER_VS_TXNIP_LOSS_PAM3		64	0.277529	0.944911	0.556534	0.685119	1	3612	tags=23%, list=15%, signal=28%
WANG_RESPONSE_TO_BEXAROTENE_UP	WANG_RESPONSE_TO_BEXAROTENE_UP		30	0.325008	0.944905	0.531738	0.684765	1	5962	tags=40%, list=25%, signal=54%
MEISSNER_BRAIN_HCP_WITH_H3K4ME2	MEISSNER_BRAIN_HCP_WITH_H3K4ME2		16	0.376181	0.944513	0.530538	0.685459	1	851	tags=19%, list=4%, signal=19%
REACTOME_TOLL_RECEPTOR_CASCADES	REACTOME_TOLL_RECEPTOR_CASCADES		110	0.255123	0.944442	0.594726	0.685274	1	4551	tags=25%, list=19%, signal=31%
BIOCARTA_RARRXR_PATHWAY	BIOCARTA_RARRXR_PATHWAY		15	0.38194	0.944249	0.541145	0.685428	1	3985	tags=33%, list=17%, signal=40%
MORI_EMU_MYC_LYMPHOMA_BY_ONSET_TIME_DN	MORI_EMU_MYC_LYMPHOMA_BY_ONSET_TIME_DN		16	0.37915	0.944059	0.532462	0.685588	1	2586	tags=38%, list=11%, signal=42%
GUO_HEX_TARGETS_DN	GUO_HEX_TARGETS_DN		62	0.278245	0.943595	0.554408	0.686469	1	4802	tags=40%, list=21%, signal=51%
ST_WNT_BETA_CATENIN_PATHWAY	ST_WNT_BETA_CATENIN_PATHWAY		34	0.31422	0.94235	0.542486	0.689479	1	2663	tags=24%, list=11%, signal=27%
STARK_HYPPOCAMPUS_22Q11_DELETION_DN	STARK_HYPPOCAMPUS_22Q11_DELETION_DN		18	0.364946	0.9421	0.537521	0.689782	1	6047	tags=50%, list=26%, signal=67%
DER_IFN_GAMMA_RESPONSE_UP	DER_IFN_GAMMA_RESPONSE_UP		66	0.274788	0.941702	0.570468	0.690493	1	4572	tags=33%, list=20%, signal=41%
KIM_WT1_TARGETS_12HR_UP	KIM_WT1_TARGETS_12HR_UP		147	0.243657	0.940773	0.615367	0.692661	1	3141	tags=21%, list=13%, signal=24%
CERIBELLI_PROMOTERS_INACTIVE_AND_BOUND_BY_NFY	CERIBELLI_PROMOTERS_INACTIVE_AND_BOUND_BY_NFY		26	0.334595	0.940457	0.54594	0.693144	1	5262	tags=27%, list=22%, signal=35%
KYNG_NORMAL_AGING_DN	KYNG_NORMAL_AGING_DN		27	0.329439	0.940386	0.539727	0.692963	1	1651	tags=11%, list=7%, signal=12%
KYNG_RESPONSE_TO_H2O2_VIA_ERCC6_UP	KYNG_RESPONSE_TO_H2O2_VIA_ERCC6_UP		37	0.308373	0.939803	0.545335	0.694159	1	5606	tags=38%, list=24%, signal=50%
REACTOME_G_BETA_GAMMA_SIGNALLING_THROUGH_PI3KGAMMA	REACTOME_G_BETA_GAMMA_SIGNALLING_THROUGH_PI3KGAMMA		25	0.336912	0.939723	0.545181	0.693999	1	3419	tags=32%, list=15%, signal=37%
AMUNDSON_RESPONSE_TO_ARSENITE	AMUNDSON_RESPONSE_TO_ARSENITE		197	0.234452	0.93942	0.638421	0.694438	1	2859	tags=17%, list=12%, signal=19%
FIGUEROA_AML_METHYLATION_CLUSTER_1_DN	FIGUEROA_AML_METHYLATION_CLUSTER_1_DN		39	0.302595	0.938946	0.555198	0.695334	1	3428	tags=26%, list=15%, signal=30%
JAZAG_TGFB1_SIGNALING_UP	JAZAG_TGFB1_SIGNALING_UP		100	0.255945	0.938673	0.596807	0.695702	1	4812	tags=32%, list=21%, signal=40%
BOGNI_TREATMENT_RELATED_MYELOID_LEUKEMIA_DN	BOGNI_TREATMENT_RELATED_MYELOID_LEUKEMIA_DN		28	0.325485	0.93853	0.547502	0.695714	1	4488	tags=32%, list=19%, signal=40%
PID_HES_HEY_PATHWAY	PID_HES_HEY_PATHWAY		48	0.289754	0.93777	0.559304	0.697398	1	5458	tags=29%, list=23%, signal=38%
VERHAAK_GLIOBLASTOMA_CLASSICAL	VERHAAK_GLIOBLASTOMA_CLASSICAL		144	0.242371	0.937683	0.630694	0.697255	1	1904	tags=13%, list=8%, signal=14%
DUTERTRE_ESTRADIOL_RESPONSE_6HR_UP	DUTERTRE_ESTRADIOL_RESPONSE_6HR_UP		216	0.231364	0.937638	0.648445	0.697004	1	4424	tags=28%, list=19%, signal=34%
WILLIAMS_ESR1_TARGETS_UP	WILLIAMS_ESR1_TARGETS_UP		25	0.337044	0.937251	0.549925	0.697675	1	4122	tags=36%, list=18%, signal=44%
KYNG_RESPONSE_TO_H2O2_VIA_ERCC6	KYNG_RESPONSE_TO_H2O2_VIA_ERCC6		16	0.373178	0.93716	0.542549	0.69755	1	5132	tags=38%, list=22%, signal=48%
APPIERTO_RESPONSE_TO_FENRETINIDE_UP	APPIERTO_RESPONSE_TO_FENRETINIDE_UP		35	0.312328	0.936999	0.550455	0.697606	1	3309	tags=29%, list=14%, signal=33%
PID_NOTCH_PATHWAY	PID_NOTCH_PATHWAY		57	0.280652	0.935311	0.573146	0.701773	1	631	tags=7%, list=3%, signal=7%
HASLINGER_B_CLL_WITH_17P13_DELETION	HASLINGER_B_CLL_WITH_17P13_DELETION		19	0.358564	0.935265	0.54622	0.701519	1	1796	tags=26%, list=8%, signal=28%
ABBUD_LIF_SIGNALING_1_DN	ABBUD_LIF_SIGNALING_1_DN		24	0.338231	0.934581	0.546427	0.702987	1	2777	tags=21%, list=12%, signal=24%
REACTOME_DOUBLE_STRAND_BREAK_REPAIR	REACTOME_DOUBLE_STRAND_BREAK_REPAIR		21	0.345367	0.934276	0.547568	0.703422	1	2202	tags=19%, list=9%, signal=21%
ODONNELL_METASTASIS_DN	ODONNELL_METASTASIS_DN		23	0.341599	0.934037	0.544362	0.703693	1	1884	tags=22%, list=8%, signal=24%
HAHTOLA_SEZARY_SYNDROM_DN	HAHTOLA_SEZARY_SYNDROM_DN		36	0.307274	0.933997	0.561404	0.703421	1	1158	tags=22%, list=5%, signal=23%
REACTOME_GLUCOSE_TRANSPORT	REACTOME_GLUCOSE_TRANSPORT		38	0.304796	0.933839	0.562324	0.703473	1	5538	tags=39%, list=24%, signal=52%
PAPASPYRIDONOS_UNSTABLE_ATEROSCLEROTIC_PLAQUE_DN	PAPASPYRIDONOS_UNSTABLE_ATEROSCLEROTIC_PLAQUE_DN		42	0.296864	0.933755	0.559597	0.703318	1	4167	tags=31%, list=18%, signal=38%
BIOCARTA_DEATH_PATHWAY	BIOCARTA_DEATH_PATHWAY		31	0.318547	0.933696	0.563374	0.703092	1	4829	tags=39%, list=21%, signal=49%
REACTOME_ION_TRANSPORT_BY_P_TYPE_ATPASES	REACTOME_ION_TRANSPORT_BY_P_TYPE_ATPASES		33	0.314568	0.933529	0.563143	0.70316	1	3927	tags=30%, list=17%, signal=36%
PID_MAPK_TRK_PATHWAY	PID_MAPK_TRK_PATHWAY		33	0.31308	0.933395	0.564741	0.703146	1	2567	tags=18%, list=11%, signal=20%
SCHRAETS_MLL_TARGETS_DN	SCHRAETS_MLL_TARGETS_DN		32	0.316007	0.932567	0.554214	0.704994	1	5093	tags=41%, list=22%, signal=52%
LANDIS_ERBB2_BREAST_PRENEOPLASTIC_UP	LANDIS_ERBB2_BREAST_PRENEOPLASTIC_UP		17	0.366388	0.93153	0.551374	0.707419	1	3297	tags=47%, list=14%, signal=55%
GRAESSMANN_RESPONSE_TO_MC_AND_SERUM_DEPRIVATION_DN	GRAESSMANN_RESPONSE_TO_MC_AND_SERUM_DEPRIVATION_DN		75	0.266035	0.931282	0.600405	0.707711	1	3515	tags=27%, list=15%, signal=31%
TIMOFEEVA_GROWTH_STRESS_VIA_STAT1_DN	TIMOFEEVA_GROWTH_STRESS_VIA_STAT1_DN		15	0.375562	0.92832	0.55669	0.715263	1	2269	tags=20%, list=10%, signal=22%
REACTOME_UNBLOCKING_OF_NMDA_RECEPTOR_GLUTAMATE_BINDING_AND_ACTIVATION	REACTOME_UNBLOCKING_OF_NMDA_RECEPTOR_GLUTAMATE_BINDING_AND_ACTIVATION		15	0.375353	0.928164	0.557161	0.715303	1	290	tags=13%, list=1%, signal=13%
ZHENG_FOXP3_TARGETS_IN_T_LYMPHOCYTE_DN	ZHENG_FOXP3_TARGETS_IN_T_LYMPHOCYTE_DN		32	0.315355	0.928148	0.57027	0.714964	1	3872	tags=25%, list=17%, signal=30%
REACTOME_CD28_CO_STIMULATION	REACTOME_CD28_CO_STIMULATION		31	0.314764	0.928043	0.568305	0.714855	1	5003	tags=35%, list=21%, signal=45%
NIKOLSKY_BREAST_CANCER_8P12_P11_AMPLICON	NIKOLSKY_BREAST_CANCER_8P12_P11_AMPLICON		50	0.287383	0.927769	0.587071	0.715199	1	4100	tags=26%, list=18%, signal=31%
SAKAI_CHRONIC_HEPATITIS_VS_LIVER_CANCER_UP	SAKAI_CHRONIC_HEPATITIS_VS_LIVER_CANCER_UP		76	0.264811	0.927725	0.603958	0.714931	1	5927	tags=49%, list=25%, signal=65%
ALONSO_METASTASIS_DN	ALONSO_METASTASIS_DN		23	0.335839	0.927666	0.554251	0.714712	1	4148	tags=30%, list=18%, signal=37%
HOSHIDA_LIVER_CANCER_LATE_RECURRENCE_UP	HOSHIDA_LIVER_CANCER_LATE_RECURRENCE_UP		58	0.276475	0.927476	0.588837	0.714836	1	2974	tags=24%, list=13%, signal=28%
ROVERSI_GLIOMA_LOH_REGIONS	ROVERSI_GLIOMA_LOH_REGIONS		43	0.29467	0.926484	0.585232	0.717076	1	1140	tags=9%, list=5%, signal=10%
KEGG_TIGHT_JUNCTION	KEGG_TIGHT_JUNCTION		125	0.244988	0.925469	0.650447	0.719399	1	3427	tags=17%, list=15%, signal=20%
NADERI_BREAST_CANCER_PROGNOSIS_UP	NADERI_BREAST_CANCER_PROGNOSIS_UP		47	0.287009	0.92488	0.592846	0.720587	1	4338	tags=23%, list=19%, signal=29%
PID_TRKR_PATHWAY	PID_TRKR_PATHWAY		59	0.275853	0.924151	0.603967	0.722149	1	2499	tags=19%, list=11%, signal=21%
PID_HNF3B_PATHWAY	PID_HNF3B_PATHWAY		44	0.290144	0.923769	0.585677	0.722787	1	584	tags=7%, list=2%, signal=7%
REACTOME_CD28_DEPENDENT_PI3K_AKT_SIGNALING	REACTOME_CD28_DEPENDENT_PI3K_AKT_SIGNALING		21	0.344412	0.923093	0.566803	0.724196	1	4829	tags=38%, list=21%, signal=48%
KEGG_VIBRIO_CHOLERAE_INFECTION	KEGG_VIBRIO_CHOLERAE_INFECTION		52	0.281556	0.922982	0.601152	0.724108	1	2268	tags=21%, list=10%, signal=23%
REACTOME_ACTIVATION_OF_CHAPERONE_GENES_BY_XBP1S	REACTOME_ACTIVATION_OF_CHAPERONE_GENES_BY_XBP1S		42	0.293635	0.922951	0.586566	0.723808	1	4206	tags=31%, list=18%, signal=38%
KOKKINAKIS_METHIONINE_DEPRIVATION_96HR_UP	KOKKINAKIS_METHIONINE_DEPRIVATION_96HR_UP		112	0.248098	0.922704	0.640501	0.72407	1	4800	tags=27%, list=20%, signal=34%
BANDRES_RESPONSE_TO_CARMUSTIN_MGMT_48HR_DN	BANDRES_RESPONSE_TO_CARMUSTIN_MGMT_48HR_DN		150	0.237867	0.922665	0.668744	0.72379	1	5277	tags=30%, list=23%, signal=38%
ICHIBA_GRAFT_VERSUS_HOST_DISEASE_D7_DN	ICHIBA_GRAFT_VERSUS_HOST_DISEASE_D7_DN		36	0.304984	0.922226	0.584341	0.724576	1	1767	tags=19%, list=8%, signal=21%
BIOCARTA_IL2_PATHWAY	BIOCARTA_IL2_PATHWAY		21	0.343667	0.921335	0.572414	0.726554	1	948	tags=14%, list=4%, signal=15%
SIG_REGULATION_OF_THE_ACTIN_CYTOSKELETON_BY_RHO_GTPASES	SIG_REGULATION_OF_THE_ACTIN_CYTOSKELETON_BY_RHO_GTPASES		35	0.305586	0.921243	0.589293	0.726418	1	5432	tags=43%, list=23%, signal=56%
CHIANG_LIVER_CANCER_SUBCLASS_INTERFERON_DN	CHIANG_LIVER_CANCER_SUBCLASS_INTERFERON_DN		43	0.292026	0.921165	0.597891	0.726241	1	3266	tags=26%, list=14%, signal=30%
WANG_THOC1_TARGETS_DN	WANG_THOC1_TARGETS_DN		19	0.352138	0.921039	0.562513	0.726186	1	5392	tags=37%, list=23%, signal=48%
GROSS_HYPOXIA_VIA_HIF1A_UP	GROSS_HYPOXIA_VIA_HIF1A_UP		76	0.263109	0.920266	0.632875	0.727835	1	4857	tags=29%, list=21%, signal=36%
SMID_BREAST_CANCER_RELAPSE_IN_BONE_UP	SMID_BREAST_CANCER_RELAPSE_IN_BONE_UP		86	0.257504	0.920178	0.634702	0.727688	1	5627	tags=34%, list=24%, signal=44%
NIKOLSKY_BREAST_CANCER_12Q13_Q21_AMPLICON	NIKOLSKY_BREAST_CANCER_12Q13_Q21_AMPLICON		39	0.29893	0.920133	0.590153	0.72742	1	6064	tags=44%, list=26%, signal=59%
BIOCARTA_TOLL_PATHWAY	BIOCARTA_TOLL_PATHWAY		36	0.303273	0.91909	0.583138	0.729791	1	5163	tags=33%, list=22%, signal=43%
MENSE_HYPOXIA_UP	MENSE_HYPOXIA_UP		89	0.25589	0.918931	0.647046	0.729817	1	4761	tags=34%, list=20%, signal=42%
SMID_BREAST_CANCER_RELAPSE_IN_LUNG_DN	SMID_BREAST_CANCER_RELAPSE_IN_LUNG_DN		31	0.312208	0.918904	0.58187	0.729505	1	2627	tags=19%, list=11%, signal=22%
KEGG_ALANINE_ASPARTATE_AND_GLUTAMATE_METABOLISM	KEGG_ALANINE_ASPARTATE_AND_GLUTAMATE_METABOLISM		31	0.313148	0.918301	0.577974	0.730709	1	4531	tags=32%, list=19%, signal=40%
REACTOME_CELL_JUNCTION_ORGANIZATION	REACTOME_CELL_JUNCTION_ORGANIZATION		76	0.260966	0.917655	0.632583	0.732022	1	3427	tags=21%, list=15%, signal=25%
REACTOME_CELL_DEATH_SIGNALLING_VIA_NRAGE_NRIF_AND_NADE	REACTOME_CELL_DEATH_SIGNALLING_VIA_NRAGE_NRIF_AND_NADE		58	0.273764	0.917508	0.608042	0.732027	1	4750	tags=31%, list=20%, signal=39%
PYEON_CANCER_HEAD_AND_NECK_VS_CERVICAL_UP	PYEON_CANCER_HEAD_AND_NECK_VS_CERVICAL_UP		166	0.233374	0.916579	0.709044	0.734081	1	3469	tags=22%, list=15%, signal=25%
CAIRO_HEPATOBLASTOMA_POOR_SURVIVAL	CAIRO_HEPATOBLASTOMA_POOR_SURVIVAL		16	0.364893	0.916538	0.563695	0.733805	1	6730	tags=50%, list=29%, signal=70%
DAVICIONI_RHABDOMYOSARCOMA_PAX_FOXO1_FUSION_DN	DAVICIONI_RHABDOMYOSARCOMA_PAX_FOXO1_FUSION_DN		15	0.372571	0.916294	0.565614	0.734066	1	1719	tags=20%, list=7%, signal=22%
BIOCARTA_CD40_PATHWAY	BIOCARTA_CD40_PATHWAY		15	0.372283	0.915752	0.568544	0.735124	1	8388	tags=53%, list=36%, signal=83%
BERTUCCI_INVASIVE_CARCINOMA_DUCTAL_VS_LOBULAR_UP	BERTUCCI_INVASIVE_CARCINOMA_DUCTAL_VS_LOBULAR_UP		23	0.33059	0.915684	0.579341	0.734915	1	4080	tags=35%, list=17%, signal=42%
MYLLYKANGAS_AMPLIFICATION_HOT_SPOT_23	MYLLYKANGAS_AMPLIFICATION_HOT_SPOT_23		18	0.35453	0.91552	0.578178	0.734955	1	1637	tags=22%, list=7%, signal=24%
WIKMAN_ASBESTOS_LUNG_CANCER_UP	WIKMAN_ASBESTOS_LUNG_CANCER_UP		16	0.36722	0.914649	0.581356	0.736829	1	2949	tags=25%, list=13%, signal=29%
LI_WILMS_TUMOR_VS_FETAL_KIDNEY_2_UP	LI_WILMS_TUMOR_VS_FETAL_KIDNEY_2_UP		30	0.313099	0.91388	0.598157	0.738461	1	3757	tags=40%, list=16%, signal=48%
POMEROY_MEDULLOBLASTOMA_PROGNOSIS_UP	POMEROY_MEDULLOBLASTOMA_PROGNOSIS_UP		39	0.29603	0.913857	0.598998	0.738134	1	5013	tags=31%, list=21%, signal=39%
TSENG_IRS1_TARGETS_DN	TSENG_IRS1_TARGETS_DN		125	0.24113	0.913782	0.681129	0.73794	1	4012	tags=25%, list=17%, signal=30%
CHENG_IMPRINTED_BY_ESTRADIOL	CHENG_IMPRINTED_BY_ESTRADIOL		94	0.251242	0.913504	0.655637	0.738273	1	3799	tags=21%, list=16%, signal=25%
KEGG_SELENOAMINO_ACID_METABOLISM	KEGG_SELENOAMINO_ACID_METABOLISM		25	0.327178	0.913248	0.582106	0.738553	1	5234	tags=40%, list=22%, signal=51%
NIKOLSKY_BREAST_CANCER_16Q24_AMPLICON	NIKOLSKY_BREAST_CANCER_16Q24_AMPLICON		41	0.292129	0.912932	0.610192	0.739012	1	2526	tags=22%, list=11%, signal=25%
DAVICIONI_MOLECULAR_ARMS_VS_ERMS_UP	DAVICIONI_MOLECULAR_ARMS_VS_ERMS_UP		303	0.21754	0.912643	0.781093	0.73937	1	2850	tags=17%, list=12%, signal=19%
DEBIASI_APOPTOSIS_BY_REOVIRUS_INFECTION_UP	DEBIASI_APOPTOSIS_BY_REOVIRUS_INFECTION_UP		282	0.218552	0.912581	0.777943	0.739146	1	4685	tags=24%, list=20%, signal=29%
LEE_AGING_MUSCLE_DN	LEE_AGING_MUSCLE_DN		44	0.289112	0.912541	0.611403	0.738864	1	3002	tags=25%, list=13%, signal=29%
FIRESTEIN_CTNNB1_PATHWAY	FIRESTEIN_CTNNB1_PATHWAY		30	0.311983	0.912299	0.596268	0.7391	1	5420	tags=37%, list=23%, signal=48%
GINESTIER_BREAST_CANCER_ZNF217_AMPLIFIED_UP	GINESTIER_BREAST_CANCER_ZNF217_AMPLIFIED_UP		68	0.265948	0.911293	0.636654	0.741312	1	5076	tags=35%, list=22%, signal=45%
SESTO_RESPONSE_TO_UV_C2	SESTO_RESPONSE_TO_UV_C2		50	0.279747	0.911162	0.626413	0.741252	1	1579	tags=12%, list=7%, signal=13%
SMIRNOV_RESPONSE_TO_IR_2HR_UP	SMIRNOV_RESPONSE_TO_IR_2HR_UP		47	0.284207	0.911002	0.626081	0.741281	1	1146	tags=15%, list=5%, signal=16%
KEGG_BASAL_TRANSCRIPTION_FACTORS	KEGG_BASAL_TRANSCRIPTION_FACTORS		33	0.306692	0.910723	0.599518	0.741621	1	5224	tags=36%, list=22%, signal=47%
REACTOME_TRANSPORT_OF_MATURE_MRNA_DERIVED_FROM_AN_INTRONLESS_TRANSCRIPT	REACTOME_TRANSPORT_OF_MATURE_MRNA_DERIVED_FROM_AN_INTRONLESS_TRANSCRIPT		32	0.307815	0.910645	0.593103	0.741442	1	5538	tags=38%, list=24%, signal=49%
DORSAM_HOXA9_TARGETS_UP	DORSAM_HOXA9_TARGETS_UP		35	0.302362	0.909608	0.607306	0.743733	1	5248	tags=46%, list=22%, signal=59%
REACTOME_FORMATION_OF_INCISION_COMPLEX_IN_GG_NER	REACTOME_FORMATION_OF_INCISION_COMPLEX_IN_GG_NER		20	0.341877	0.909331	0.588448	0.744062	1	4800	tags=40%, list=20%, signal=50%
XU_HGF_TARGETS_REPRESSED_BY_AKT1_DN	XU_HGF_TARGETS_REPRESSED_BY_AKT1_DN		78	0.259741	0.909001	0.640371	0.744522	1	1673	tags=12%, list=7%, signal=12%
PID_LKB1_PATHWAY	PID_LKB1_PATHWAY		45	0.285699	0.908446	0.623565	0.745555	1	4824	tags=36%, list=21%, signal=45%
WNT_SIGNALING	WNT_SIGNALING		88	0.252402	0.907848	0.671273	0.746724	1	4958	tags=30%, list=21%, signal=37%
DAZARD_UV_RESPONSE_CLUSTER_G4	DAZARD_UV_RESPONSE_CLUSTER_G4		20	0.34233	0.906646	0.595695	0.749415	1	3832	tags=25%, list=16%, signal=30%
REACTOME_CHONDROITIN_SULFATE_BIOSYNTHESIS	REACTOME_CHONDROITIN_SULFATE_BIOSYNTHESIS		19	0.346306	0.905616	0.5946	0.751658	1	1105	tags=21%, list=5%, signal=22%
BRUINS_UVC_RESPONSE_MIDDLE	BRUINS_UVC_RESPONSE_MIDDLE		84	0.254329	0.905288	0.669721	0.752112	1	3630	tags=23%, list=16%, signal=27%
APPEL_IMATINIB_RESPONSE	APPEL_IMATINIB_RESPONSE		32	0.304798	0.905012	0.618031	0.752438	1	3900	tags=34%, list=17%, signal=41%
WAMUNYOKOLI_OVARIAN_CANCER_GRADES_1_2_DN	WAMUNYOKOLI_OVARIAN_CANCER_GRADES_1_2_DN		60	0.269461	0.904675	0.641794	0.752909	1	2939	tags=22%, list=13%, signal=25%
WANG_LSD1_TARGETS_UP	WANG_LSD1_TARGETS_UP		22	0.333882	0.903539	0.596829	0.755419	1	2374	tags=18%, list=10%, signal=20%
THUM_MIR21_TARGETS_HEART_DISEASE_UP	THUM_MIR21_TARGETS_HEART_DISEASE_UP		16	0.35977	0.903516	0.590919	0.755087	1	1779	tags=25%, list=8%, signal=27%
GENTLES_LEUKEMIC_STEM_CELL_UP	GENTLES_LEUKEMIC_STEM_CELL_UP		27	0.316151	0.902992	0.605145	0.756024	1	4468	tags=44%, list=19%, signal=55%
DOANE_RESPONSE_TO_ANDROGEN_UP	DOANE_RESPONSE_TO_ANDROGEN_UP		152	0.232412	0.902791	0.736916	0.756138	1	3460	tags=20%, list=15%, signal=24%
LANDIS_BREAST_CANCER_PROGRESSION_UP	LANDIS_BREAST_CANCER_PROGRESSION_UP		42	0.28819	0.902714	0.633732	0.755954	1	4338	tags=38%, list=19%, signal=47%
KEGG_OTHER_GLYCAN_DEGRADATION	KEGG_OTHER_GLYCAN_DEGRADATION		16	0.359609	0.902188	0.594255	0.756903	1	810	tags=13%, list=3%, signal=13%
SHETH_LIVER_CANCER_VS_TXNIP_LOSS_PAM6	SHETH_LIVER_CANCER_VS_TXNIP_LOSS_PAM6		44	0.284816	0.901864	0.633806	0.757334	1	4023	tags=25%, list=17%, signal=30%
KOKKINAKIS_METHIONINE_DEPRIVATION_48HR_UP	KOKKINAKIS_METHIONINE_DEPRIVATION_48HR_UP		123	0.239389	0.901693	0.707536	0.757367	1	3014	tags=17%, list=13%, signal=19%
NIKOLSKY_BREAST_CANCER_1Q21_AMPLICON	NIKOLSKY_BREAST_CANCER_1Q21_AMPLICON		36	0.296393	0.900527	0.627527	0.759934	1	3940	tags=28%, list=17%, signal=33%
REACTOME_SYNTHESIS_SECRETION_AND_INACTIVATION_OF_GLP1	REACTOME_SYNTHESIS_SECRETION_AND_INACTIVATION_OF_GLP1		17	0.356436	0.900398	0.593001	0.759867	1	1958	tags=29%, list=8%, signal=32%
REACTOME_ACTIVATION_OF_KAINATE_RECEPTORS_UPON_GLUTAMATE_BINDING	REACTOME_ACTIVATION_OF_KAINATE_RECEPTORS_UPON_GLUTAMATE_BINDING		31	0.307142	0.900004	0.627064	0.760477	1	3846	tags=35%, list=16%, signal=42%
KEGG_PROGESTERONE_MEDIATED_OOCYTE_MATURATION	KEGG_PROGESTERONE_MEDIATED_OOCYTE_MATURATION		82	0.253969	0.899997	0.683021	0.760107	1	3901	tags=24%, list=17%, signal=29%
MOOTHA_GLYCOGEN_METABOLISM	MOOTHA_GLYCOGEN_METABOLISM		19	0.342376	0.899153	0.600337	0.761839	1	3704	tags=32%, list=16%, signal=37%
LEE_CALORIE_RESTRICTION_MUSCLE_DN	LEE_CALORIE_RESTRICTION_MUSCLE_DN		49	0.276168	0.898268	0.648542	0.763684	1	3983	tags=33%, list=17%, signal=39%
BROWNE_HCMV_INFECTION_18HR_UP	BROWNE_HCMV_INFECTION_18HR_UP		167	0.227743	0.898228	0.759885	0.76339	1	5073	tags=28%, list=22%, signal=35%
REACTOME_ACTIVATION_OF_ATR_IN_RESPONSE_TO_REPLICATION_STRESS	REACTOME_ACTIVATION_OF_ATR_IN_RESPONSE_TO_REPLICATION_STRESS		35	0.297945	0.897895	0.63313	0.763824	1	4147	tags=29%, list=18%, signal=35%
LEE_AGING_MUSCLE_UP	LEE_AGING_MUSCLE_UP		42	0.286385	0.897776	0.639387	0.763739	1	3431	tags=26%, list=15%, signal=31%
AMIT_SERUM_RESPONSE_60_MCF10A	AMIT_SERUM_RESPONSE_60_MCF10A		54	0.273246	0.896466	0.653283	0.766636	1	1490	tags=15%, list=6%, signal=16%
VANTVEER_BREAST_CANCER_METASTASIS_UP	VANTVEER_BREAST_CANCER_METASTASIS_UP		47	0.279138	0.895865	0.651382	0.767726	1	2956	tags=26%, list=13%, signal=29%
TOMIDA_METASTASIS_UP	TOMIDA_METASTASIS_UP		23	0.328255	0.895739	0.613489	0.767646	1	5075	tags=52%, list=22%, signal=67%
SARTIPY_BLUNTED_BY_INSULIN_RESISTANCE_DN	SARTIPY_BLUNTED_BY_INSULIN_RESISTANCE_DN		18	0.3468	0.895566	0.598052	0.767692	1	4539	tags=44%, list=19%, signal=55%
REACTOME_INHIBITION_OF_VOLTAGE_GATED_CA2_CHANNELS_VIA_GBETA_GAMMA_SUBUNITS	REACTOME_INHIBITION_OF_VOLTAGE_GATED_CA2_CHANNELS_VIA_GBETA_GAMMA_SUBUNITS		25	0.320483	0.895478	0.625326	0.767521	1	3419	tags=36%, list=15%, signal=42%
GROSS_HYPOXIA_VIA_ELK3_DN	GROSS_HYPOXIA_VIA_ELK3_DN		148	0.231008	0.895445	0.758613	0.767208	1	4148	tags=24%, list=18%, signal=29%
KYNG_WERNER_SYNDROM_DN	KYNG_WERNER_SYNDROM_DN		25	0.318885	0.895363	0.620017	0.767018	1	1651	tags=12%, list=7%, signal=13%
BROWNE_HCMV_INFECTION_20HR_UP	BROWNE_HCMV_INFECTION_20HR_UP		212	0.22078	0.895321	0.792609	0.766728	1	4295	tags=23%, list=18%, signal=28%
PID_BARD1_PATHWAY	PID_BARD1_PATHWAY		28	0.31063	0.894759	0.624368	0.767731	1	7422	tags=46%, list=32%, signal=68%
REACTOME_PYRIMIDINE_METABOLISM	REACTOME_PYRIMIDINE_METABOLISM		24	0.324853	0.893792	0.622042	0.769734	1	1767	tags=21%, list=8%, signal=23%
LEE_CALORIE_RESTRICTION_MUSCLE_UP	LEE_CALORIE_RESTRICTION_MUSCLE_UP		39	0.290102	0.893223	0.642357	0.770745	1	4128	tags=31%, list=18%, signal=37%
COLDREN_GEFITINIB_RESISTANCE_UP	COLDREN_GEFITINIB_RESISTANCE_UP		75	0.256388	0.893075	0.684683	0.770729	1	6325	tags=44%, list=27%, signal=60%
BIOCARTA_KERATINOCYTE_PATHWAY	BIOCARTA_KERATINOCYTE_PATHWAY		44	0.281715	0.892531	0.648555	0.771684	1	5018	tags=30%, list=21%, signal=38%
RICKMAN_HEAD_AND_NECK_CANCER_C	RICKMAN_HEAD_AND_NECK_CANCER_C		89	0.248816	0.892484	0.699384	0.77141	1	1882	tags=13%, list=8%, signal=15%
LEE_LIVER_CANCER_SURVIVAL_UP	LEE_LIVER_CANCER_SURVIVAL_UP		153	0.229852	0.892449	0.761466	0.771105	1	4675	tags=27%, list=20%, signal=33%
DARWICHE_PAPILLOMA_RISK_HIGH_DN	DARWICHE_PAPILLOMA_RISK_HIGH_DN		153	0.229585	0.892409	0.764473	0.770811	1	3222	tags=20%, list=14%, signal=23%
YE_METASTATIC_LIVER_CANCER	YE_METASTATIC_LIVER_CANCER		21	0.333212	0.89209	0.622381	0.771199	1	1382	tags=10%, list=6%, signal=10%
LIU_SOX4_TARGETS_UP	LIU_SOX4_TARGETS_UP		120	0.238098	0.890934	0.741299	0.773636	1	4603	tags=28%, list=20%, signal=35%
REACTOME_TRANSMEMBRANE_TRANSPORT_OF_SMALL_MOLECULES	REACTOME_TRANSMEMBRANE_TRANSPORT_OF_SMALL_MOLECULES		392	0.207009	0.890913	0.893299	0.773295	1	3995	tags=22%, list=17%, signal=26%
GUO_TARGETS_OF_IRS1_AND_IRS2	GUO_TARGETS_OF_IRS1_AND_IRS2		89	0.248159	0.888885	0.715125	0.777844	1	5213	tags=31%, list=22%, signal=40%
HOLLEMAN_VINCRISTINE_RESISTANCE_ALL_UP	HOLLEMAN_VINCRISTINE_RESISTANCE_ALL_UP		26	0.314452	0.888425	0.631074	0.778546	1	4409	tags=42%, list=19%, signal=52%
KANG_FLUOROURACIL_RESISTANCE_DN	KANG_FLUOROURACIL_RESISTANCE_DN		15	0.359792	0.88786	0.60805	0.779524	1	1366	tags=13%, list=6%, signal=14%
HUMMERICH_BENIGN_SKIN_TUMOR_UP	HUMMERICH_BENIGN_SKIN_TUMOR_UP		16	0.354468	0.887734	0.618804	0.779429	1	4395	tags=44%, list=19%, signal=54%
REACTOME_SIGNALING_BY_ERBB2	REACTOME_SIGNALING_BY_ERBB2		95	0.243728	0.887116	0.723739	0.780537	1	4668	tags=31%, list=20%, signal=38%
PID_P38_ALPHA_BETA_DOWNSTREAM_PATHWAY	PID_P38_ALPHA_BETA_DOWNSTREAM_PATHWAY		37	0.29074	0.886788	0.656659	0.780941	1	948	tags=14%, list=4%, signal=14%
KEGG_METABOLISM_OF_XENOBIOTICS_BY_CYTOCHROME_P450	KEGG_METABOLISM_OF_XENOBIOTICS_BY_CYTOCHROME_P450		39	0.2864	0.88671	0.652308	0.780741	1	1684	tags=10%, list=7%, signal=11%
INGRAM_SHH_TARGETS_DN	INGRAM_SHH_TARGETS_DN		54	0.268214	0.885635	0.681253	0.782937	1	4958	tags=33%, list=21%, signal=42%
SMID_BREAST_CANCER_RELAPSE_IN_LUNG_UP	SMID_BREAST_CANCER_RELAPSE_IN_LUNG_UP		19	0.338299	0.885476	0.619266	0.782929	1	2324	tags=26%, list=10%, signal=29%
KEGG_FRUCTOSE_AND_MANNOSE_METABOLISM	KEGG_FRUCTOSE_AND_MANNOSE_METABOLISM		33	0.295887	0.883661	0.647623	0.786886	1	3153	tags=27%, list=13%, signal=31%
GAVIN_IL2_RESPONSIVE_FOXP3_TARGETS_UP	GAVIN_IL2_RESPONSIVE_FOXP3_TARGETS_UP		17	0.345875	0.883562	0.616617	0.786724	1	3267	tags=35%, list=14%, signal=41%
BIOCARTA_VIP_PATHWAY	BIOCARTA_VIP_PATHWAY		25	0.316415	0.882838	0.641059	0.788053	1	4116	tags=40%, list=18%, signal=48%
BONOME_OVARIAN_CANCER_POOR_SURVIVAL_DN	BONOME_OVARIAN_CANCER_POOR_SURVIVAL_DN		20	0.333689	0.882252	0.631735	0.789046	1	5963	tags=45%, list=25%, signal=60%
NEWMAN_ERCC6_TARGETS_UP	NEWMAN_ERCC6_TARGETS_UP		21	0.328111	0.881481	0.631961	0.790485	1	5684	tags=43%, list=24%, signal=57%
KRIEG_HYPOXIA_VIA_KDM3A	KRIEG_HYPOXIA_VIA_KDM3A		48	0.274173	0.880915	0.68446	0.791428	1	2655	tags=23%, list=11%, signal=26%
PID_INTEGRIN2_PATHWAY	PID_INTEGRIN2_PATHWAY		27	0.308848	0.880204	0.644817	0.792709	1	2296	tags=19%, list=10%, signal=21%
FUKUSHIMA_TNFSF11_TARGETS	FUKUSHIMA_TNFSF11_TARGETS		16	0.349782	0.88019	0.620237	0.792345	1	403	tags=13%, list=2%, signal=13%
GAUSSMANN_MLL_AF4_FUSION_TARGETS_E_DN	GAUSSMANN_MLL_AF4_FUSION_TARGETS_E_DN		22	0.323893	0.87988	0.640877	0.792676	1	3810	tags=23%, list=16%, signal=27%
PID_CD8_TCR_DOWNSTREAM_PATHWAY	PID_CD8_TCR_DOWNSTREAM_PATHWAY		56	0.265209	0.878774	0.704676	0.794893	1	3267	tags=20%, list=14%, signal=23%
DAUER_STAT3_TARGETS_UP	DAUER_STAT3_TARGETS_UP		45	0.276574	0.878592	0.691337	0.794919	1	1372	tags=11%, list=6%, signal=12%
PID_ENDOTHELIN_PATHWAY	PID_ENDOTHELIN_PATHWAY		61	0.259047	0.878446	0.707703	0.794867	1	2499	tags=16%, list=11%, signal=18%
KIM_MYCN_AMPLIFICATION_TARGETS_DN	KIM_MYCN_AMPLIFICATION_TARGETS_DN		89	0.243994	0.878232	0.744676	0.794971	1	3316	tags=20%, list=14%, signal=23%
PID_BETA_CATENIN_DEG_PATHWAY	PID_BETA_CATENIN_DEG_PATHWAY		17	0.345626	0.878177	0.628046	0.794701	1	4862	tags=47%, list=21%, signal=59%
[truncated: 244 more rows]

## Sheet: GSEA_enriched Tet2KO MPP cells
NAME	GS<br> follow link to MSigDB	GS DETAILS	SIZE	ES	NES	NOM p-val	FDR q-val	FWER p-val	RANK AT MAX	LEADING EDGE
MOSERLE_IFNA_RESPONSE	MOSERLE_IFNA_RESPONSE	Details ...	23	-0.762687	-2.05796	0	0.0141866	0.0199	4258	tags=70%, list=18%, signal=85%
BOYLAN_MULTIPLE_MYELOMA_PCA1_UP	BOYLAN_MULTIPLE_MYELOMA_PCA1_UP	Details ...	95	-0.571519	-2.02128	0	0.01547	0.0427	2528	tags=33%, list=11%, signal=36%
DAUER_STAT3_TARGETS_DN	DAUER_STAT3_TARGETS_DN	Details ...	40	-0.633386	-1.91648	0.000183352	0.0701477	0.2537	4258	tags=52%, list=18%, signal=64%
SHIN_B_CELL_LYMPHOMA_CLUSTER_2	SHIN_B_CELL_LYMPHOMA_CLUSTER_2	Details ...	30	-0.663557	-1.88791	0.00074239	0.0852414	0.3779	4368	tags=47%, list=19%, signal=57%
BIOCARTA_INTRINSIC_PATHWAY	BIOCARTA_INTRINSIC_PATHWAY	Details ...	23	-0.693711	-1.86125	0.000935104	0.102984	0.5133	1692	tags=30%, list=7%, signal=33%
EINAV_INTERFERON_SIGNATURE_IN_CANCER	EINAV_INTERFERON_SIGNATURE_IN_CANCER	Details ...	24	-0.676266	-1.83298	0.00150376	0.129895	0.6647	2306	tags=42%, list=10%, signal=46%
MIKKELSEN_IPS_ICP_WITH_H3K27ME3	MIKKELSEN_IPS_ICP_WITH_H3K27ME3	Details ...	52	-0.564925	-1.80082	0.000549753	0.174881	0.8214	3037	tags=35%, list=13%, signal=40%
FARMER_BREAST_CANCER_CLUSTER_1	FARMER_BREAST_CANCER_CLUSTER_1	Details ...	36	-0.60036	-1.78642	0.00109649	0.185353	0.876	1491	tags=33%, list=6%, signal=36%
BERTUCCI_INVASIVE_CARCINOMA_DUCTAL_VS_LOBULAR_DN	BERTUCCI_INVASIVE_CARCINOMA_DUCTAL_VS_LOBULAR_DN	Details ...	43	-0.58073	-1.78502	0.0007357	0.168032	0.8809	2076	tags=30%, list=9%, signal=33%
MISHRA_CARCINOMA_ASSOCIATED_FIBROBLAST_DN	MISHRA_CARCINOMA_ASSOCIATED_FIBROBLAST_DN	Details ...	22	-0.666079	-1.76852	0.00244867	0.186881	0.9292	1062	tags=23%, list=5%, signal=24%
REACTOME_INTERFERON_ALPHA_BETA_SIGNALING	REACTOME_INTERFERON_ALPHA_BETA_SIGNALING	Details ...	48	-0.555468	-1.74868	0.0010985	0.217853	0.9669	3329	tags=31%, list=14%, signal=36%
HOWLIN_CITED1_TARGETS_1_UP	HOWLIN_CITED1_TARGETS_1_UP	Details ...	32	-0.602994	-1.74795	0.00207156	0.20151	0.9675	4467	tags=47%, list=19%, signal=58%
PID_ARF6_PATHWAY	PID_ARF6_PATHWAY	Details ...	33	-0.597931	-1.73925	0.00297508	0.206366	0.9772	2888	tags=39%, list=12%, signal=45%
KIM_GERMINAL_CENTER_T_HELPER_DN	KIM_GERMINAL_CENTER_T_HELPER_DN	Details ...	19	-0.67762	-1.73202	0.00355207	0.209213	0.9836	1032	tags=32%, list=4%, signal=33%
CLASPER_LYMPHATIC_VESSELS_DURING_METASTASIS_DN	CLASPER_LYMPHATIC_VESSELS_DURING_METASTASIS_DN	Details ...	35	-0.585923	-1.72925	0.00242176	0.202032	0.9862	2526	tags=34%, list=11%, signal=38%
YAN_ESCAPE_FROM_ANOIKIS	YAN_ESCAPE_FROM_ANOIKIS	Details ...	21	-0.653379	-1.72338	0.00520253	0.202748	0.9891	2306	tags=48%, list=10%, signal=53%
BIOCARTA_AMI_PATHWAY	BIOCARTA_AMI_PATHWAY	Details ...	19	-0.672595	-1.71661	0.00507233	0.206867	0.9925	1692	tags=32%, list=7%, signal=34%
WANG_IMMORTALIZED_BY_HOXA9_AND_MEIS1_UP	WANG_IMMORTALIZED_BY_HOXA9_AND_MEIS1_UP	Details ...	29	-0.606948	-1.71249	0.00296296	0.205128	0.9944	1393	tags=31%, list=6%, signal=33%
BROWNE_INTERFERON_RESPONSIVE_GENES	BROWNE_INTERFERON_RESPONSIVE_GENES	Details ...	58	-0.524999	-1.70329	0.00200255	0.216082	0.9964	4805	tags=53%, list=21%, signal=67%
MIKKELSEN_NPC_LCP_WITH_H3K4ME3	MIKKELSEN_NPC_LCP_WITH_H3K4ME3	Details ...	49	-0.539373	-1.70059	0.00167162	0.211637	0.9968	5061	tags=49%, list=22%, signal=62%
REACTOME_YAP1_AND_WWTR1_TAZ_STIMULATED_GENE_EXPRESSION	REACTOME_YAP1_AND_WWTR1_TAZ_STIMULATED_GENE_EXPRESSION		23	-0.632965	-1.69987	0.00787992	0.203281	0.997	3160	tags=43%, list=13%, signal=50%
ONO_AML1_TARGETS_DN	ONO_AML1_TARGETS_DN		39	-0.564045	-1.69681	0.00299963	0.200666	0.9981	811	tags=21%, list=3%, signal=21%
DELASERNA_MYOD_TARGETS_DN	DELASERNA_MYOD_TARGETS_DN		54	-0.525539	-1.68644	0.00202541	0.215769	0.9989	2132	tags=30%, list=9%, signal=33%
BOYLAN_MULTIPLE_MYELOMA_C_D_DN	BOYLAN_MULTIPLE_MYELOMA_C_D_DN		233	-0.424664	-1.68622	0	0.207276	0.9989	2770	tags=30%, list=12%, signal=33%
MASRI_RESISTANCE_TO_TAMOXIFEN_AND_AROMATASE_INHIBITORS_DN	MASRI_RESISTANCE_TO_TAMOXIFEN_AND_AROMATASE_INHIBITORS_DN		19	-0.649965	-1.67001	0.0107183	0.237983	0.9996	4793	tags=58%, list=20%, signal=73%
GRANDVAUX_IRF3_TARGETS_UP	GRANDVAUX_IRF3_TARGETS_UP		15	-0.692161	-1.66983	0.00945034	0.229278	0.9996	2660	tags=60%, list=11%, signal=68%
KEGG_COMPLEMENT_AND_COAGULATION_CASCADES	KEGG_COMPLEMENT_AND_COAGULATION_CASCADES		62	-0.502422	-1.65936	0.00217628	0.247084	0.9999	1925	tags=24%, list=8%, signal=26%
HECKER_IFNB1_TARGETS	HECKER_IFNB1_TARGETS		77	-0.483935	-1.65284	0.00106553	0.255193	1	4551	tags=45%, list=19%, signal=56%
LIU_SMARCA4_TARGETS	LIU_SMARCA4_TARGETS		53	-0.517846	-1.65131	0.00294605	0.250314	1	1023	tags=23%, list=4%, signal=24%
KUROZUMI_RESPONSE_TO_ONCOCYTIC_VIRUS	KUROZUMI_RESPONSE_TO_ONCOCYTIC_VIRUS		42	-0.539748	-1.65105	0.00583197	0.242562	1	2226	tags=38%, list=10%, signal=42%
DARWICHE_PAPILLOMA_PROGRESSION_RISK	DARWICHE_PAPILLOMA_PROGRESSION_RISK		68	-0.493875	-1.64847	0.00161725	0.241094	1	6169	tags=49%, list=26%, signal=66%
SCHURINGA_STAT5A_TARGETS_DN	SCHURINGA_STAT5A_TARGETS_DN		15	-0.68479	-1.64752	0.0106748	0.235947	1	2429	tags=40%, list=10%, signal=45%
PID_TCPTP_PATHWAY	PID_TCPTP_PATHWAY		42	-0.54345	-1.64679	0.00383002	0.230492	1	2858	tags=36%, list=12%, signal=41%
GUTIERREZ_CHRONIC_LYMPHOCYTIC_LEUKEMIA_DN	GUTIERREZ_CHRONIC_LYMPHOCYTIC_LEUKEMIA_DN		51	-0.515302	-1.64191	0.0045438	0.23505	1	4393	tags=49%, list=19%, signal=60%
ONO_FOXP3_TARGETS_UP	ONO_FOXP3_TARGETS_UP		23	-0.608428	-1.63677	0.0103569	0.240851	1	1635	tags=39%, list=7%, signal=42%
YAO_TEMPORAL_RESPONSE_TO_PROGESTERONE_CLUSTER_1	YAO_TEMPORAL_RESPONSE_TO_PROGESTERONE_CLUSTER_1		67	-0.488269	-1.6336	0.00179856	0.241857	1	2805	tags=25%, list=12%, signal=29%
MARTORIATI_MDM4_TARGETS_NEUROEPITHELIUM_DN	MARTORIATI_MDM4_TARGETS_NEUROEPITHELIUM_DN		151	-0.432895	-1.63191	0.00085955	0.239202	1	1642	tags=18%, list=7%, signal=19%
CUI_TCF21_TARGETS_UP	CUI_TCF21_TARGETS_UP		37	-0.542311	-1.61601	0.00836431	0.273237	1	2607	tags=35%, list=11%, signal=39%
CASORELLI_APL_SECONDARY_VS_DE_NOVO_UP	CASORELLI_APL_SECONDARY_VS_DE_NOVO_UP		36	-0.543045	-1.60987	0.00784242	0.283048	1	3771	tags=42%, list=16%, signal=50%
SPIELMAN_LYMPHOBLAST_EUROPEAN_VS_ASIAN_2FC_DN	SPIELMAN_LYMPHOBLAST_EUROPEAN_VS_ASIAN_2FC_DN		17	-0.645647	-1.60944	0.0173037	0.277089	1	3410	tags=59%, list=15%, signal=69%
CHEN_LVAD_SUPPORT_OF_FAILING_HEART_DN	CHEN_LVAD_SUPPORT_OF_FAILING_HEART_DN		40	-0.530703	-1.6027	0.0086812	0.288542	1	1765	tags=30%, list=8%, signal=32%
ALTEMEIER_RESPONSE_TO_LPS_WITH_MECHANICAL_VENTILATION	ALTEMEIER_RESPONSE_TO_LPS_WITH_MECHANICAL_VENTILATION		113	-0.440545	-1.59804	0.00124955	0.294516	1	3168	tags=30%, list=14%, signal=35%
KIM_GLIS2_TARGETS_UP	KIM_GLIS2_TARGETS_UP		75	-0.46675	-1.59173	0.00307637	0.305873	1	2153	tags=21%, list=9%, signal=23%
KANG_AR_TARGETS_UP	KANG_AR_TARGETS_UP		17	-0.637938	-1.59014	0.0206767	0.303496	1	1692	tags=29%, list=7%, signal=32%
KEGG_CELL_ADHESION_MOLECULES_CAMS	KEGG_CELL_ADHESION_MOLECULES_CAMS		107	-0.443191	-1.5866	0.00175623	0.306824	1	3168	tags=31%, list=14%, signal=36%
SWEET_KRAS_TARGETS_UP	SWEET_KRAS_TARGETS_UP		80	-0.460795	-1.5858	0.00356506	0.302376	1	2449	tags=26%, list=10%, signal=29%
DORN_ADENOVIRUS_INFECTION_12HR_UP	DORN_ADENOVIRUS_INFECTION_12HR_UP		28	-0.560655	-1.57951	0.0154937	0.313854	1	3062	tags=32%, list=13%, signal=37%
WEBER_METHYLATED_HCP_IN_SPERM_DN	WEBER_METHYLATED_HCP_IN_SPERM_DN		26	-0.571605	-1.57586	0.0172123	0.317927	1	1230	tags=19%, list=5%, signal=20%
REACTOME_VOLTAGE_GATED_POTASSIUM_CHANNELS	REACTOME_VOLTAGE_GATED_POTASSIUM_CHANNELS		43	-0.512118	-1.57293	0.0125409	0.319952	1	3095	tags=33%, list=13%, signal=37%
KEGG_TYPE_II_DIABETES_MELLITUS	KEGG_TYPE_II_DIABETES_MELLITUS		45	-0.504519	-1.56843	0.010582	0.327078	1	2226	tags=27%, list=10%, signal=29%
KUROZUMI_RESPONSE_TO_ONCOCYTIC_VIRUS_AND_CYCLIC_RGD	KUROZUMI_RESPONSE_TO_ONCOCYTIC_VIRUS_AND_CYCLIC_RGD		20	-0.600618	-1.56803	0.0241491	0.321898	1	1323	tags=30%, list=6%, signal=32%
PEDERSEN_TARGETS_OF_611CTF_ISOFORM_OF_ERBB2	PEDERSEN_TARGETS_OF_611CTF_ISOFORM_OF_ERBB2		64	-0.469912	-1.56313	0.00753261	0.330168	1	3152	tags=34%, list=13%, signal=40%
GENTILE_UV_LOW_DOSE_DN	GENTILE_UV_LOW_DOSE_DN		61	-0.473359	-1.56184	0.00789136	0.327749	1	2619	tags=30%, list=11%, signal=33%
VECCHI_GASTRIC_CANCER_EARLY_DN	VECCHI_GASTRIC_CANCER_EARLY_DN		308	-0.383114	-1.5598	0	0.327502	1	2351	tags=21%, list=10%, signal=23%
BONOME_OVARIAN_CANCER_POOR_SURVIVAL_UP	BONOME_OVARIAN_CANCER_POOR_SURVIVAL_UP		31	-0.540519	-1.55539	0.0186244	0.334431	1	5762	tags=52%, list=25%, signal=68%
YANAGIHARA_ESX1_TARGETS	YANAGIHARA_ESX1_TARGETS		28	-0.553755	-1.55421	0.0206742	0.331965	1	3450	tags=36%, list=15%, signal=42%
ZHOU_INFLAMMATORY_RESPONSE_LPS_UP	ZHOU_INFLAMMATORY_RESPONSE_LPS_UP		339	-0.375775	-1.54623	0	0.350107	1	4946	tags=33%, list=21%, signal=41%
REACTOME_N_GLYCAN_ANTENNAE_ELONGATION_IN_THE_MEDIAL_TRANS_GOLGI	REACTOME_N_GLYCAN_ANTENNAE_ELONGATION_IN_THE_MEDIAL_TRANS_GOLGI		18	-0.605127	-1.54493	0.0338318	0.34798	1	1580	tags=39%, list=7%, signal=42%
FARMER_BREAST_CANCER_CLUSTER_4	FARMER_BREAST_CANCER_CLUSTER_4		19	-0.601322	-1.54485	0.0257045	0.342324	1	2329	tags=37%, list=10%, signal=41%
AIGNER_ZEB1_TARGETS	AIGNER_ZEB1_TARGETS		34	-0.528025	-1.54441	0.0181852	0.337941	1	4301	tags=38%, list=18%, signal=47%
REACTOME_SYNTHESIS_OF_PIPS_AT_THE_PLASMA_MEMBRANE	REACTOME_SYNTHESIS_OF_PIPS_AT_THE_PLASMA_MEMBRANE		30	-0.536071	-1.53426	0.0242458	0.363162	1	2236	tags=30%, list=10%, signal=33%
REACTOME_INTERFERON_GAMMA_SIGNALING	REACTOME_INTERFERON_GAMMA_SIGNALING		43	-0.496933	-1.53393	0.0148203	0.358409	1	4461	tags=47%, list=19%, signal=57%
MIKKELSEN_ES_HCP_WITH_H3K27ME3	MIKKELSEN_ES_HCP_WITH_H3K27ME3		39	-0.506624	-1.53214	0.0224802	0.358389	1	3203	tags=26%, list=14%, signal=30%
BOQUEST_STEM_CELL_DN	BOQUEST_STEM_CELL_DN		195	-0.39241	-1.52939	0.00086881	0.361344	1	1953	tags=21%, list=8%, signal=23%
ST_G_ALPHA_I_PATHWAY	ST_G_ALPHA_I_PATHWAY		34	-0.521571	-1.52933	0.0206052	0.355973	1	2969	tags=35%, list=13%, signal=40%
HERNANDEZ_MITOTIC_ARREST_BY_DOCETAXEL_1_DN	HERNANDEZ_MITOTIC_ARREST_BY_DOCETAXEL_1_DN		35	-0.519574	-1.52867	0.0232299	0.352643	1	2012	tags=26%, list=9%, signal=28%
ODONNELL_METASTASIS_UP	ODONNELL_METASTASIS_UP		70	-0.453036	-1.52522	0.0102795	0.357831	1	1949	tags=20%, list=8%, signal=22%
OSADA_ASCL1_TARGETS_DN	OSADA_ASCL1_TARGETS_DN		23	-0.572081	-1.52397	0.0309933	0.356374	1	128	tags=17%, list=1%, signal=17%
REACTOME_TRAF6_MEDIATED_IRF7_ACTIVATION	REACTOME_TRAF6_MEDIATED_IRF7_ACTIVATION		25	-0.554314	-1.52092	0.0281584	0.360431	1	3771	tags=32%, list=16%, signal=38%
BOYLAN_MULTIPLE_MYELOMA_C_UP	BOYLAN_MULTIPLE_MYELOMA_C_UP		45	-0.490586	-1.52024	0.0172826	0.357352	1	1732	tags=22%, list=7%, signal=24%
HOFMANN_MYELODYSPLASTIC_SYNDROM_LOW_RISK_UP	HOFMANN_MYELODYSPLASTIC_SYNDROM_LOW_RISK_UP		20	-0.586374	-1.51993	0.034392	0.353257	1	3547	tags=40%, list=15%, signal=47%
SANA_RESPONSE_TO_IFNG_UP	SANA_RESPONSE_TO_IFNG_UP		55	-0.469449	-1.51893	0.0138402	0.351266	1	4258	tags=38%, list=18%, signal=47%
REACTOME_ABC_FAMILY_PROTEINS_MEDIATED_TRANSPORT	REACTOME_ABC_FAMILY_PROTEINS_MEDIATED_TRANSPORT		29	-0.535327	-1.51471	0.0259548	0.358848	1	5732	tags=66%, list=24%, signal=87%
REACTOME_REGULATION_OF_IFNA_SIGNALING	REACTOME_REGULATION_OF_IFNA_SIGNALING		19	-0.593745	-1.51394	0.0320755	0.35628	1	2332	tags=21%, list=10%, signal=23%
TAKEDA_TARGETS_OF_NUP98_HOXA9_FUSION_3D_UP	TAKEDA_TARGETS_OF_NUP98_HOXA9_FUSION_3D_UP		149	-0.400462	-1.51187	0.00280407	0.357732	1	4169	tags=37%, list=18%, signal=45%
CHANG_IMMORTALIZED_BY_HPV31_DN	CHANG_IMMORTALIZED_BY_HPV31_DN		55	-0.468851	-1.51038	0.0149806	0.357594	1	2304	tags=25%, list=10%, signal=28%
TAKEDA_TARGETS_OF_NUP98_HOXA9_FUSION_10D_UP	TAKEDA_TARGETS_OF_NUP98_HOXA9_FUSION_10D_UP		157	-0.397997	-1.50961	0.00156495	0.355256	1	4169	tags=38%, list=18%, signal=45%
REACTOME_ACYL_CHAIN_REMODELLING_OF_PC	REACTOME_ACYL_CHAIN_REMODELLING_OF_PC		22	-0.565205	-1.50342	0.03371	0.369336	1	2535	tags=23%, list=11%, signal=25%
REACTOME_SIGNALING_BY_FGFR1_FUSION_MUTANTS	REACTOME_SIGNALING_BY_FGFR1_FUSION_MUTANTS		17	-0.606488	-1.50088	0.0418301	0.372477	1	2391	tags=35%, list=10%, signal=39%
REACTOME_EXTRACELLULAR_MATRIX_ORGANIZATION	REACTOME_EXTRACELLULAR_MATRIX_ORGANIZATION		83	-0.434557	-1.50086	0.0110347	0.367874	1	5196	tags=41%, list=22%, signal=52%
JACKSON_DNMT1_TARGETS_UP	JACKSON_DNMT1_TARGETS_UP		76	-0.440094	-1.50075	0.0101321	0.363684	1	2306	tags=18%, list=10%, signal=20%
ROYLANCE_BREAST_CANCER_16Q_COPY_NUMBER_DN	ROYLANCE_BREAST_CANCER_16Q_COPY_NUMBER_DN		22	-0.560578	-1.49912	0.0358477	0.364095	1	2216	tags=23%, list=9%, signal=25%
BOQUEST_STEM_CELL_UP	BOQUEST_STEM_CELL_UP		246	-0.375476	-1.49869	0.000168067	0.360959	1	3019	tags=23%, list=13%, signal=26%
LE_NEURONAL_DIFFERENTIATION_UP	LE_NEURONAL_DIFFERENTIATION_UP		15	-0.620967	-1.49762	0.0491405	0.359859	1	2820	tags=40%, list=12%, signal=45%
UROSEVIC_RESPONSE_TO_IMIQUIMOD	UROSEVIC_RESPONSE_TO_IMIQUIMOD		17	-0.598931	-1.49691	0.0451914	0.357735	1	1314	tags=35%, list=6%, signal=37%
LEE_TARGETS_OF_PTCH1_AND_SUFU_DN	LEE_TARGETS_OF_PTCH1_AND_SUFU_DN		79	-0.433899	-1.48877	0.0115596	0.377823	1	4383	tags=43%, list=19%, signal=53%
SENGUPTA_NASOPHARYNGEAL_CARCINOMA_WITH_LMP1_DN	SENGUPTA_NASOPHARYNGEAL_CARCINOMA_WITH_LMP1_DN		131	-0.402143	-1.48654	0.00653479	0.380394	1	3199	tags=24%, list=14%, signal=28%
VARELA_ZMPSTE24_TARGETS_DN	VARELA_ZMPSTE24_TARGETS_DN		32	-0.513708	-1.4846	0.0320465	0.382072	1	17	tags=6%, list=0%, signal=6%
KORKOLA_EMBRYONIC_CARCINOMA_VS_SEMINOMA_DN	KORKOLA_EMBRYONIC_CARCINOMA_VS_SEMINOMA_DN		22	-0.558232	-1.48373	0.0436722	0.380429	1	3007	tags=23%, list=13%, signal=26%
KEGG_LINOLEIC_ACID_METABOLISM	KEGG_LINOLEIC_ACID_METABOLISM		19	-0.58015	-1.48372	0.0487256	0.376231	1	5114	tags=37%, list=22%, signal=47%
HADDAD_T_LYMPHOCYTE_AND_NK_PROGENITOR_UP	HADDAD_T_LYMPHOCYTE_AND_NK_PROGENITOR_UP		74	-0.435114	-1.48323	0.0146481	0.373536	1	2144	tags=27%, list=9%, signal=30%
NIELSEN_GIST_VS_SYNOVIAL_SARCOMA_UP	NIELSEN_GIST_VS_SYNOVIAL_SARCOMA_UP		18	-0.584626	-1.48262	0.0505992	0.371374	1	3289	tags=33%, list=14%, signal=39%
VART_KSHV_INFECTION_ANGIOGENIC_MARKERS_UP	VART_KSHV_INFECTION_ANGIOGENIC_MARKERS_UP		162	-0.389882	-1.48115	0.00363322	0.371744	1	2633	tags=23%, list=11%, signal=26%
KATSANOU_ELAVL1_TARGETS_UP	KATSANOU_ELAVL1_TARGETS_UP		158	-0.390574	-1.47831	0.00329289	0.376229	1	2065	tags=24%, list=9%, signal=26%
REACTOME_IMMUNOREGULATORY_INTERACTIONS_BETWEEN_A_LYMPHOID_AND_A_NON_LYMPHOID_CELL	REACTOME_IMMUNOREGULATORY_INTERACTIONS_BETWEEN_A_LYMPHOID_AND_A_NON_LYMPHOID_CELL		44	-0.476964	-1.47789	0.027156	0.373518	1	3979	tags=41%, list=17%, signal=49%
DURAND_STROMA_S_UP	DURAND_STROMA_S_UP		273	-0.367517	-1.47553	0.000337496	0.37669	1	4437	tags=35%, list=19%, signal=43%
CERVERA_SDHB_TARGETS_1_DN	CERVERA_SDHB_TARGETS_1_DN		33	-0.506446	-1.47538	0.0349386	0.37324	1	1797	tags=21%, list=8%, signal=23%
HUANG_GATA2_TARGETS_UP	HUANG_GATA2_TARGETS_UP		136	-0.397885	-1.47485	0.00512186	0.371005	1	1846	tags=24%, list=8%, signal=26%
BIOCARTA_IL22BP_PATHWAY	BIOCARTA_IL22BP_PATHWAY		16	-0.599235	-1.47482	0.0474376	0.367342	1	2739	tags=38%, list=12%, signal=42%
BOYAULT_LIVER_CANCER_SUBCLASS_G2	BOYAULT_LIVER_CANCER_SUBCLASS_G2		26	-0.535455	-1.474	0.0397937	0.365988	1	3353	tags=54%, list=14%, signal=63%
WANG_SMARCE1_TARGETS_UP	WANG_SMARCE1_TARGETS_UP		257	-0.366501	-1.47042	0.000833194	0.372863	1	2540	tags=26%, list=11%, signal=28%
TAVOR_CEBPA_TARGETS_DN	TAVOR_CEBPA_TARGETS_DN		26	-0.530596	-1.46926	0.0467847	0.372642	1	1303	tags=27%, list=6%, signal=28%
JI_CARCINOGENESIS_BY_KRAS_AND_STK11_DN	JI_CARCINOGENESIS_BY_KRAS_AND_STK11_DN		17	-0.591468	-1.46884	0.0550285	0.37022	1	355	tags=24%, list=2%, signal=24%
MIKKELSEN_MEF_LCP_WITH_H3K4ME3	MIKKELSEN_MEF_LCP_WITH_H3K4ME3		115	-0.405568	-1.46861	0.00806169	0.367334	1	4233	tags=38%, list=18%, signal=46%
PHESSE_TARGETS_OF_APC_AND_MBD2_UP	PHESSE_TARGETS_OF_APC_AND_MBD2_UP		19	-0.570378	-1.46744	0.0492537	0.367207	1	1804	tags=21%, list=8%, signal=23%
ZHANG_INTERFERON_RESPONSE	ZHANG_INTERFERON_RESPONSE		19	-0.572221	-1.46695	0.0510008	0.365153	1	2147	tags=32%, list=9%, signal=35%
VART_KSHV_INFECTION_ANGIOGENIC_MARKERS_DN	VART_KSHV_INFECTION_ANGIOGENIC_MARKERS_DN		134	-0.394885	-1.46506	0.00589664	0.367123	1	3225	tags=25%, list=14%, signal=28%
KEGG_PHOSPHATIDYLINOSITOL_SIGNALING_SYSTEM	KEGG_PHOSPHATIDYLINOSITOL_SIGNALING_SYSTEM		74	-0.428911	-1.46292	0.0176449	0.369797	1	3787	tags=36%, list=16%, signal=43%
STREICHER_LSM1_TARGETS_DN	STREICHER_LSM1_TARGETS_DN		17	-0.583051	-1.45674	0.0602612	0.384435	1	764	tags=24%, list=3%, signal=24%
FRASOR_RESPONSE_TO_ESTRADIOL_UP	FRASOR_RESPONSE_TO_ESTRADIOL_UP		35	-0.493382	-1.45539	0.0363603	0.384898	1	4146	tags=34%, list=18%, signal=42%
PARK_TRETINOIN_RESPONSE_AND_RARA_PLZF_FUSION	PARK_TRETINOIN_RESPONSE_AND_RARA_PLZF_FUSION		21	-0.555299	-1.45532	0.048912	0.381655	1	2969	tags=38%, list=13%, signal=44%
CHYLA_CBFA2T3_TARGETS_UP	CHYLA_CBFA2T3_TARGETS_UP		355	-0.353063	-1.45445	0	0.380817	1	2198	tags=22%, list=9%, signal=24%
ONDER_CDH1_TARGETS_3_UP	ONDER_CDH1_TARGETS_3_UP		16	-0.594737	-1.45295	0.0650513	0.381869	1	4091	tags=44%, list=17%, signal=53%
RASHI_RESPONSE_TO_IONIZING_RADIATION_6	RASHI_RESPONSE_TO_IONIZING_RADIATION_6		76	-0.424601	-1.45272	0.0161175	0.379193	1	3344	tags=25%, list=14%, signal=29%
PID_IL6_7_PATHWAY	PID_IL6_7_PATHWAY		46	-0.466587	-1.44859	0.03125	0.388188	1	2332	tags=26%, list=10%, signal=29%
REACTOME_IL_RECEPTOR_SHC_SIGNALING	REACTOME_IL_RECEPTOR_SHC_SIGNALING		26	-0.521634	-1.44771	0.0481384	0.387439	1	4461	tags=38%, list=19%, signal=47%
MEISSNER_BRAIN_HCP_WITH_H3K27ME3	MEISSNER_BRAIN_HCP_WITH_H3K27ME3		260	-0.361726	-1.44734	0.00135272	0.385232	1	4586	tags=23%, list=20%, signal=29%
MIKKELSEN_IPS_WITH_HCP_H3K27ME3	MIKKELSEN_IPS_WITH_HCP_H3K27ME3		96	-0.409217	-1.44643	0.0130328	0.384647	1	3203	tags=25%, list=14%, signal=29%
GENTILE_UV_RESPONSE_CLUSTER_D9	GENTILE_UV_RESPONSE_CLUSTER_D9		24	-0.536343	-1.44613	0.0557093	0.382271	1	2270	tags=33%, list=10%, signal=37%
RAMASWAMY_METASTASIS_DN	RAMASWAMY_METASTASIS_DN		54	-0.451054	-1.44505	0.0274995	0.382264	1	4200	tags=41%, list=18%, signal=50%
REACTOME_ACYL_CHAIN_REMODELLING_OF_PI	REACTOME_ACYL_CHAIN_REMODELLING_OF_PI		15	-0.596003	-1.44415	0.0665392	0.381735	1	2224	tags=13%, list=9%, signal=15%
BROWNE_HCMV_INFECTION_12HR_DN	BROWNE_HCMV_INFECTION_12HR_DN		91	-0.411457	-1.44184	0.0161205	0.385368	1	2430	tags=25%, list=10%, signal=28%
MOROSETTI_FACIOSCAPULOHUMERAL_MUSCULAR_DISTROPHY_UP	MOROSETTI_FACIOSCAPULOHUMERAL_MUSCULAR_DISTROPHY_UP		19	-0.56052	-1.43612	0.0639743	0.399249	1	2387	tags=42%, list=10%, signal=47%
BROWNE_HCMV_INFECTION_4HR_UP	BROWNE_HCMV_INFECTION_4HR_UP		49	-0.451597	-1.43525	0.0356692	0.398697	1	3750	tags=39%, list=16%, signal=46%
MEISSNER_BRAIN_HCP_WITH_H3_UNMETHYLATED	MEISSNER_BRAIN_HCP_WITH_H3_UNMETHYLATED		33	-0.490572	-1.43065	0.0522014	0.409387	1	1857	tags=27%, list=8%, signal=30%
MIKKELSEN_IPS_ICP_WITH_H3K4ME3_AND_H327ME3	MIKKELSEN_IPS_ICP_WITH_H3K4ME3_AND_H327ME3		117	-0.392321	-1.43057	0.0149893	0.406383	1	6327	tags=43%, list=27%, signal=58%
CADWELL_ATG16L1_TARGETS_UP	CADWELL_ATG16L1_TARGETS_UP		85	-0.409179	-1.42946	0.0201283	0.406597	1	4587	tags=32%, list=20%, signal=39%
PID_CDC42_REG_PATHWAY	PID_CDC42_REG_PATHWAY		30	-0.502072	-1.42924	0.0519866	0.404048	1	4060	tags=47%, list=17%, signal=56%
KIM_LRRC3B_TARGETS	KIM_LRRC3B_TARGETS		18	-0.563739	-1.42803	0.0678658	0.404557	1	1202	tags=33%, list=5%, signal=35%
JAZAERI_BREAST_CANCER_BRCA1_VS_BRCA2_DN	JAZAERI_BREAST_CANCER_BRCA1_VS_BRCA2_DN		40	-0.47157	-1.42786	0.039779	0.401942	1	1656	tags=25%, list=7%, signal=27%
HAN_JNK_SINGALING_DN	HAN_JNK_SINGALING_DN		37	-0.480598	-1.42689	0.0447594	0.401776	1	2810	tags=27%, list=12%, signal=31%
PID_GMCSF_PATHWAY	PID_GMCSF_PATHWAY		35	-0.485266	-1.42635	0.0465332	0.400356	1	2740	tags=26%, list=12%, signal=29%
KEGG_INOSITOL_PHOSPHATE_METABOLISM	KEGG_INOSITOL_PHOSPHATE_METABOLISM		54	-0.443979	-1.42569	0.034058	0.399284	1	4148	tags=37%, list=18%, signal=45%
REACTOME_PI_METABOLISM	REACTOME_PI_METABOLISM		46	-0.457844	-1.42424	0.0425455	0.400627	1	3787	tags=30%, list=16%, signal=36%
LI_CISPLATIN_RESISTANCE_DN	LI_CISPLATIN_RESISTANCE_DN		29	-0.503329	-1.42091	0.0517369	0.407632	1	4717	tags=34%, list=20%, signal=43%
ICHIBA_GRAFT_VERSUS_HOST_DISEASE_D7_UP	ICHIBA_GRAFT_VERSUS_HOST_DISEASE_D7_UP		94	-0.40246	-1.41831	0.0196429	0.412413	1	2171	tags=22%, list=9%, signal=25%
CHIANG_LIVER_CANCER_SUBCLASS_POLYSOMY7_DN	CHIANG_LIVER_CANCER_SUBCLASS_POLYSOMY7_DN		23	-0.527516	-1.41734	0.0663675	0.412415	1	1221	tags=26%, list=5%, signal=27%
STAMBOLSKY_RESPONSE_TO_VITAMIN_D3_UP	STAMBOLSKY_RESPONSE_TO_VITAMIN_D3_UP		70	-0.420867	-1.41539	0.0280645	0.415325	1	2344	tags=26%, list=10%, signal=28%
SIG_PIP3_SIGNALING_IN_B_LYMPHOCYTES	SIG_PIP3_SIGNALING_IN_B_LYMPHOCYTES		35	-0.480891	-1.41488	0.0504738	0.413898	1	5633	tags=60%, list=24%, signal=79%
NAKAYAMA_SOFT_TISSUE_TUMORS_PCA2_DN	NAKAYAMA_SOFT_TISSUE_TUMORS_PCA2_DN		66	-0.42427	-1.41481	0.0259382	0.411142	1	5304	tags=39%, list=23%, signal=51%
BOYLAN_MULTIPLE_MYELOMA_C_CLUSTER_DN	BOYLAN_MULTIPLE_MYELOMA_C_CLUSTER_DN		29	-0.502889	-1.41451	0.0584948	0.409106	1	2564	tags=41%, list=11%, signal=46%
BOYLAN_MULTIPLE_MYELOMA_C_DN	BOYLAN_MULTIPLE_MYELOMA_C_DN		52	-0.44391	-1.41382	0.0383416	0.408209	1	2564	tags=33%, list=11%, signal=37%
PID_S1P_S1P3_PATHWAY	PID_S1P_S1P3_PATHWAY		29	-0.499923	-1.4093	0.0555248	0.418999	1	2216	tags=31%, list=9%, signal=34%
BIOCARTA_P38MAPK_PATHWAY	BIOCARTA_P38MAPK_PATHWAY		38	-0.469647	-1.40884	0.0493735	0.417497	1	4906	tags=45%, list=21%, signal=57%
HOWLIN_CITED1_TARGETS_2_UP	HOWLIN_CITED1_TARGETS_2_UP		15	-0.584264	-1.40761	0.0847876	0.418306	1	2558	tags=27%, list=11%, signal=30%
MIKKELSEN_MCV6_LCP_WITH_H3K4ME3	MIKKELSEN_MCV6_LCP_WITH_H3K4ME3		146	-0.37609	-1.40744	0.00969026	0.416	1	5546	tags=37%, list=24%, signal=48%
KEGG_CYTOKINE_CYTOKINE_RECEPTOR_INTERACTION	KEGG_CYTOKINE_CYTOKINE_RECEPTOR_INTERACTION		227	-0.356021	-1.40692	0.00496831	0.41471	1	3034	tags=20%, list=13%, signal=23%
SERVITJA_LIVER_HNF1A_TARGETS_DN	SERVITJA_LIVER_HNF1A_TARGETS_DN		142	-0.376346	-1.40678	0.0117523	0.412348	1	3222	tags=21%, list=14%, signal=24%
SMID_BREAST_CANCER_NORMAL_LIKE_UP	SMID_BREAST_CANCER_NORMAL_LIKE_UP		411	-0.336216	-1.40649	0.000486855	0.410444	1	3042	tags=23%, list=13%, signal=26%
IZADPANAH_STEM_CELL_ADIPOSE_VS_BONE_DN	IZADPANAH_STEM_CELL_ADIPOSE_VS_BONE_DN		100	-0.392836	-1.40445	0.0228521	0.413763	1	1659	tags=23%, list=7%, signal=25%
MIKKELSEN_MCV6_HCP_WITH_H3K27ME3	MIKKELSEN_MCV6_HCP_WITH_H3K27ME3		411	-0.335196	-1.40409	0.000809061	0.412087	1	6291	tags=34%, list=27%, signal=45%
REACTOME_ACYL_CHAIN_REMODELLING_OF_PE	REACTOME_ACYL_CHAIN_REMODELLING_OF_PE		21	-0.531883	-1.40279	0.0786769	0.413291	1	2535	tags=24%, list=11%, signal=27%
CHEBOTAEV_GR_TARGETS_DN	CHEBOTAEV_GR_TARGETS_DN		113	-0.387441	-1.40072	0.0186269	0.416854	1	3862	tags=29%, list=16%, signal=35%
KORKOLA_YOLK_SAC_TUMOR	KORKOLA_YOLK_SAC_TUMOR		51	-0.438777	-1.39925	0.0443213	0.418627	1	2931	tags=25%, list=13%, signal=29%
WILCOX_RESPONSE_TO_PROGESTERONE_DN	WILCOX_RESPONSE_TO_PROGESTERONE_DN		62	-0.425756	-1.39844	0.0405698	0.418349	1	2237	tags=27%, list=10%, signal=30%
LINDSTEDT_DENDRITIC_CELL_MATURATION_D	LINDSTEDT_DENDRITIC_CELL_MATURATION_D		60	-0.428269	-1.39806	0.0344954	0.416797	1	2945	tags=30%, list=13%, signal=34%
PID_IL23_PATHWAY	PID_IL23_PATHWAY		37	-0.471006	-1.39485	0.0567153	0.423929	1	2391	tags=22%, list=10%, signal=24%
REACTOME_INTERFERON_SIGNALING	REACTOME_INTERFERON_SIGNALING		128	-0.378887	-1.3942	0.0149991	0.42323	1	5054	tags=36%, list=22%, signal=46%
BENNETT_SYSTEMIC_LUPUS_ERYTHEMATOSUS	BENNETT_SYSTEMIC_LUPUS_ERYTHEMATOSUS		26	-0.504462	-1.39365	0.0716165	0.422251	1	4805	tags=38%, list=21%, signal=48%
BANDRES_RESPONSE_TO_CARMUSTIN_MGMT_48HR_UP	BANDRES_RESPONSE_TO_CARMUSTIN_MGMT_48HR_UP		15	-0.575879	-1.39154	0.090043	0.425998	1	4152	tags=47%, list=18%, signal=57%
ROSS_AML_WITH_CBFB_MYH11_FUSION	ROSS_AML_WITH_CBFB_MYH11_FUSION		47	-0.444241	-1.3889	0.0513287	0.431409	1	2528	tags=30%, list=11%, signal=33%
SWEET_LUNG_CANCER_KRAS_DN	SWEET_LUNG_CANCER_KRAS_DN		412	-0.333026	-1.38694	0.000475662	0.434736	1	2558	tags=19%, list=11%, signal=21%
REACTOME_COLLAGEN_FORMATION	REACTOME_COLLAGEN_FORMATION		57	-0.427965	-1.38658	0.0489766	0.433183	1	6327	tags=53%, list=27%, signal=72%
REACTOME_CIRCADIAN_REPRESSION_OF_EXPRESSION_BY_REV_ERBA	REACTOME_CIRCADIAN_REPRESSION_OF_EXPRESSION_BY_REV_ERBA		22	-0.520217	-1.38587	0.083131	0.432758	1	3203	tags=45%, list=14%, signal=53%
KANG_GIST_WITH_PDGFRA_UP	KANG_GIST_WITH_PDGFRA_UP		48	-0.441102	-1.38169	0.0482569	0.443105	1	3386	tags=29%, list=14%, signal=34%
PICCALUGA_ANGIOIMMUNOBLASTIC_LYMPHOMA_UP	PICCALUGA_ANGIOIMMUNOBLASTIC_LYMPHOMA_UP		193	-0.355828	-1.38117	0.00876439	0.442083	1	3238	tags=25%, list=14%, signal=29%
TORCHIA_TARGETS_OF_EWSR1_FLI1_FUSION_UP	TORCHIA_TARGETS_OF_EWSR1_FLI1_FUSION_UP		243	-0.346563	-1.38044	0.00634921	0.441713	1	4130	tags=31%, list=18%, signal=37%
TONKS_TARGETS_OF_RUNX1_RUNX1T1_FUSION_GRANULOCYTE_UP	TONKS_TARGETS_OF_RUNX1_RUNX1T1_FUSION_GRANULOCYTE_UP		51	-0.431933	-1.37655	0.0509905	0.451444	1	1604	tags=22%, list=7%, signal=23%
WATTEL_AUTONOMOUS_THYROID_ADENOMA_UP	WATTEL_AUTONOMOUS_THYROID_ADENOMA_UP		63	-0.417715	-1.37622	0.0410685	0.449834	1	5829	tags=43%, list=25%, signal=57%
RIZ_ERYTHROID_DIFFERENTIATION_6HR	RIZ_ERYTHROID_DIFFERENTIATION_6HR		39	-0.457391	-1.37409	0.067252	0.454046	1	5895	tags=44%, list=25%, signal=58%
MARZEC_IL2_SIGNALING_DN	MARZEC_IL2_SIGNALING_DN		34	-0.471921	-1.37383	0.0722527	0.452202	1	2052	tags=24%, list=9%, signal=26%
MIKKELSEN_MCV6_ICP_WITH_H3K27ME3	MIKKELSEN_MCV6_ICP_WITH_H3K27ME3		67	-0.411615	-1.37007	0.045406	0.461647	1	4357	tags=27%, list=19%, signal=33%
ROYLANCE_BREAST_CANCER_16Q_COPY_NUMBER_UP	ROYLANCE_BREAST_CANCER_16Q_COPY_NUMBER_UP		51	-0.432341	-1.36992	0.0534994	0.459452	1	4745	tags=39%, list=20%, signal=49%
BROWNE_HCMV_INFECTION_12HR_UP	BROWNE_HCMV_INFECTION_12HR_UP		92	-0.391197	-1.36987	0.0291932	0.456993	1	4468	tags=33%, list=19%, signal=40%
REACTOME_DEGRADATION_OF_THE_EXTRACELLULAR_MATRIX	REACTOME_DEGRADATION_OF_THE_EXTRACELLULAR_MATRIX		26	-0.492955	-1.36871	0.0865078	0.458116	1	1542	tags=19%, list=7%, signal=21%
GAUSSMANN_MLL_AF4_FUSION_TARGETS_A_UP	GAUSSMANN_MLL_AF4_FUSION_TARGETS_A_UP		171	-0.356802	-1.36865	0.0139007	0.455723	1	4455	tags=31%, list=19%, signal=38%
BAKKER_FOXO3_TARGETS_UP	BAKKER_FOXO3_TARGETS_UP		57	-0.421595	-1.3675	0.0516011	0.456776	1	3162	tags=30%, list=14%, signal=34%
GU_PDEF_TARGETS_UP	GU_PDEF_TARGETS_UP		69	-0.406239	-1.36483	0.0461318	0.462616	1	2526	tags=28%, list=11%, signal=31%
REACTOME_A_TETRASACCHARIDE_LINKER_SEQUENCE_IS_REQUIRED_FOR_GAG_SYNTHESIS	REACTOME_A_TETRASACCHARIDE_LINKER_SEQUENCE_IS_REQUIRED_FOR_GAG_SYNTHESIS		25	-0.498972	-1.36288	0.0870291	0.466335	1	2006	tags=32%, list=9%, signal=35%
MCCLUNG_CREB1_TARGETS_DN	MCCLUNG_CREB1_TARGETS_DN		52	-0.426966	-1.36212	0.0542565	0.466235	1	4383	tags=33%, list=19%, signal=40%
MCBRYAN_PUBERTAL_TGFB1_TARGETS_DN	MCBRYAN_PUBERTAL_TGFB1_TARGETS_DN		60	-0.416298	-1.35955	0.0545286	0.471872	1	2143	tags=23%, list=9%, signal=26%
MEISSNER_NPC_HCP_WITH_H3_UNMETHYLATED	MEISSNER_NPC_HCP_WITH_H3_UNMETHYLATED		489	-0.320566	-1.35688	0.00160179	0.477962	1	4909	tags=29%, list=21%, signal=36%
REACTOME_CHEMOKINE_RECEPTORS_BIND_CHEMOKINES	REACTOME_CHEMOKINE_RECEPTORS_BIND_CHEMOKINES		48	-0.432114	-1.3568	0.0596822	0.475611	1	1504	tags=21%, list=6%, signal=22%
REACTOME_FORMATION_OF_FIBRIN_CLOT_CLOTTING_CASCADE	REACTOME_FORMATION_OF_FIBRIN_CLOT_CLOTTING_CASCADE		31	-0.473097	-1.35645	0.085404	0.474168	1	1489	tags=23%, list=6%, signal=24%
MIKKELSEN_ES_LCP_WITH_H3K4ME3	MIKKELSEN_ES_LCP_WITH_H3K4ME3		119	-0.370521	-1.3562	0.026662	0.472429	1	2476	tags=23%, list=11%, signal=25%
BEGUM_TARGETS_OF_PAX3_FOXO1_FUSION_DN	BEGUM_TARGETS_OF_PAX3_FOXO1_FUSION_DN		45	-0.43649	-1.35372	0.0666418	0.477971	1	2237	tags=29%, list=10%, signal=32%
BHAT_ESR1_TARGETS_NOT_VIA_AKT1_DN	BHAT_ESR1_TARGETS_NOT_VIA_AKT1_DN		84	-0.389554	-1.35352	0.0418671	0.47609	1	3864	tags=33%, list=17%, signal=40%
ONDER_CDH1_TARGETS_1_UP	ONDER_CDH1_TARGETS_1_UP		116	-0.372308	-1.3517	0.0309369	0.479433	1	5616	tags=39%, list=24%, signal=51%
VALK_AML_WITH_FLT3_ITD	VALK_AML_WITH_FLT3_ITD		37	-0.453995	-1.35158	0.0804914	0.477277	1	1432	tags=30%, list=6%, signal=32%
MARSON_FOXP3_CORE_DIRECT_TARGETS	MARSON_FOXP3_CORE_DIRECT_TARGETS		18	-0.534952	-1.35117	0.108067	0.476133	1	2551	tags=39%, list=11%, signal=44%
MCMURRAY_TP53_HRAS_COOPERATION_RESPONSE_DN	MCMURRAY_TP53_HRAS_COOPERATION_RESPONSE_DN		65	-0.406811	-1.35108	0.0513194	0.473927	1	4409	tags=38%, list=19%, signal=47%
GAUSSMANN_MLL_AF4_FUSION_TARGETS_C_UP	GAUSSMANN_MLL_AF4_FUSION_TARGETS_C_UP		162	-0.35654	-1.35001	0.018735	0.474866	1	4449	tags=36%, list=19%, signal=44%
YANG_BREAST_CANCER_ESR1_UP	YANG_BREAST_CANCER_ESR1_UP		33	-0.464324	-1.34628	0.0872384	0.484603	1	4045	tags=42%, list=17%, signal=51%
TUOMISTO_TUMOR_SUPPRESSION_BY_COL13A1_DN	TUOMISTO_TUMOR_SUPPRESSION_BY_COL13A1_DN		17	-0.537528	-1.34531	0.113032	0.485285	1	7706	tags=53%, list=33%, signal=79%
ZHENG_IL22_SIGNALING_UP	ZHENG_IL22_SIGNALING_UP		50	-0.423668	-1.34514	0.0646052	0.483349	1	2930	tags=30%, list=13%, signal=34%
PID_S1P_S1P1_PATHWAY	PID_S1P_S1P1_PATHWAY		21	-0.514976	-1.34456	0.104455	0.482811	1	1072	tags=29%, list=5%, signal=30%
THEODOROU_MAMMARY_TUMORIGENESIS	THEODOROU_MAMMARY_TUMORIGENESIS		29	-0.477485	-1.34454	0.0901931	0.480424	1	4268	tags=31%, list=18%, signal=38%
ZEMBUTSU_SENSITIVITY_TO_DOXORUBICIN	ZEMBUTSU_SENSITIVITY_TO_DOXORUBICIN		16	-0.546074	-1.34423	0.112961	0.479001	1	2380	tags=31%, list=10%, signal=35%
WONG_ENDMETRIUM_CANCER_UP	WONG_ENDMETRIUM_CANCER_UP		23	-0.50052	-1.34393	0.106613	0.477561	1	6658	tags=52%, list=28%, signal=73%
PID_IL4_2PATHWAY	PID_IL4_2PATHWAY		59	-0.410616	-1.34343	0.0605562	0.476771	1	3355	tags=27%, list=14%, signal=32%
CROONQUIST_IL6_DEPRIVATION_UP	CROONQUIST_IL6_DEPRIVATION_UP		17	-0.539141	-1.34333	0.114498	0.474733	1	4451	tags=41%, list=19%, signal=51%
TAKEDA_TARGETS_OF_NUP98_HOXA9_FUSION_8D_UP	TAKEDA_TARGETS_OF_NUP98_HOXA9_FUSION_8D_UP		135	-0.360941	-1.34302	0.0271978	0.473366	1	4097	tags=35%, list=17%, signal=42%
MIKKELSEN_MEF_HCP_WITH_H3_UNMETHYLATED	MIKKELSEN_MEF_HCP_WITH_H3_UNMETHYLATED		209	-0.343764	-1.34227	0.0143984	0.473435	1	3849	tags=26%, list=16%, signal=31%
MIYAGAWA_TARGETS_OF_EWSR1_ETS_FUSIONS_UP	MIYAGAWA_TARGETS_OF_EWSR1_ETS_FUSIONS_UP		234	-0.337754	-1.34226	0.0135893	0.471134	1	4170	tags=29%, list=18%, signal=36%
PEREZ_TP63_TARGETS	PEREZ_TP63_TARGETS		308	-0.328433	-1.34122	0.00950634	0.472233	1	4301	tags=31%, list=18%, signal=38%
VANASSE_BCL2_TARGETS_UP	VANASSE_BCL2_TARGETS_UP		35	-0.454952	-1.33931	0.0875831	0.475999	1	5309	tags=57%, list=23%, signal=74%
KEGG_ALPHA_LINOLENIC_ACID_METABOLISM	KEGG_ALPHA_LINOLENIC_ACID_METABOLISM		18	-0.5272	-1.33903	0.111238	0.474588	1	3204	tags=28%, list=14%, signal=32%
NIKOLSKY_BREAST_CANCER_6P24_P22_AMPLICON	NIKOLSKY_BREAST_CANCER_6P24_P22_AMPLICON		20	-0.514495	-1.33695	0.104549	0.478895	1	4813	tags=40%, list=21%, signal=50%
STARK_PREFRONTAL_CORTEX_22Q11_DELETION_UP	STARK_PREFRONTAL_CORTEX_22Q11_DELETION_UP		183	-0.345674	-1.33576	0.0179125	0.480449	1	4426	tags=34%, list=19%, signal=41%
STOSSI_RESPONSE_TO_ESTRADIOL	STOSSI_RESPONSE_TO_ESTRADIOL		44	-0.431126	-1.33291	0.0771365	0.487317	1	6269	tags=39%, list=27%, signal=53%
ICHIBA_GRAFT_VERSUS_HOST_DISEASE_35D_DN	ICHIBA_GRAFT_VERSUS_HOST_DISEASE_35D_DN		43	-0.435859	-1.33252	0.083961	0.486281	1	3207	tags=30%, list=14%, signal=35%
VECCHI_GASTRIC_CANCER_ADVANCED_VS_EARLY_UP	VECCHI_GASTRIC_CANCER_ADVANCED_VS_EARLY_UP		158	-0.352576	-1.33248	0.0250959	0.484133	1	2522	tags=28%, list=11%, signal=31%
TAKEDA_TARGETS_OF_NUP98_HOXA9_FUSION_16D_UP	TAKEDA_TARGETS_OF_NUP98_HOXA9_FUSION_16D_UP		145	-0.355005	-1.33233	0.0275309	0.482296	1	2892	tags=26%, list=12%, signal=30%
EBAUER_TARGETS_OF_PAX3_FOXO1_FUSION_UP	EBAUER_TARGETS_OF_PAX3_FOXO1_FUSION_UP		189	-0.342356	-1.33166	0.0232155	0.482228	1	4960	tags=35%, list=21%, signal=44%
PID_NECTIN_PATHWAY	PID_NECTIN_PATHWAY		30	-0.46672	-1.33105	0.0970856	0.481955	1	1774	tags=30%, list=8%, signal=32%
KEGG_LONG_TERM_DEPRESSION	KEGG_LONG_TERM_DEPRESSION		68	-0.397503	-1.32882	0.0610371	0.486912	1	3456	tags=29%, list=15%, signal=34%
NEWMAN_ERCC6_TARGETS_DN	NEWMAN_ERCC6_TARGETS_DN		33	-0.456501	-1.328	0.0994076	0.487375	1	1696	tags=18%, list=7%, signal=20%
PLASARI_TGFB1_TARGETS_1HR_UP	PLASARI_TGFB1_TARGETS_1HR_UP		34	-0.454967	-1.32788	0.0952998	0.485502	1	2514	tags=26%, list=11%, signal=30%
PID_AJDISS_2PATHWAY	PID_AJDISS_2PATHWAY		46	-0.426711	-1.32732	0.0788842	0.485053	1	4231	tags=35%, list=18%, signal=42%
PEDERSEN_METASTASIS_BY_ERBB2_ISOFORM_6	PEDERSEN_METASTASIS_BY_ERBB2_ISOFORM_6		26	-0.481008	-1.32642	0.107672	0.485798	1	2040	tags=27%, list=9%, signal=29%
LEE_METASTASIS_AND_ALTERNATIVE_SPLICING_UP	LEE_METASTASIS_AND_ALTERNATIVE_SPLICING_UP		69	-0.395828	-1.32591	0.0634495	0.485232	1	2051	tags=19%, list=9%, signal=21%
WALLACE_PROSTATE_CANCER_RACE_UP	WALLACE_PROSTATE_CANCER_RACE_UP		239	-0.333098	-1.32483	0.0146761	0.486525	1	3386	tags=30%, list=14%, signal=35%
WANG_MLL_TARGETS	WANG_MLL_TARGETS		276	-0.328085	-1.32432	0.0102469	0.486033	1	2996	tags=25%, list=13%, signal=28%
WHITFIELD_CELL_CYCLE_G1_S	WHITFIELD_CELL_CYCLE_G1_S		122	-0.360981	-1.32413	0.0380919	0.48447	1	2804	tags=24%, list=12%, signal=27%
PID_SHP2_PATHWAY	PID_SHP2_PATHWAY		54	-0.410542	-1.32369	0.0723397	0.483712	1	1314	tags=17%, list=6%, signal=18%
DUTERTRE_ESTRADIOL_RESPONSE_6HR_DN	DUTERTRE_ESTRADIOL_RESPONSE_6HR_DN		83	-0.382206	-1.32312	0.0570565	0.483408	1	3986	tags=35%, list=17%, signal=42%
MAHADEVAN_RESPONSE_TO_MP470_UP	MAHADEVAN_RESPONSE_TO_MP470_UP		17	-0.529931	-1.32205	0.133346	0.484716	1	2493	tags=35%, list=11%, signal=39%
GOZGIT_ESR1_TARGETS_UP	GOZGIT_ESR1_TARGETS_UP		125	-0.35987	-1.32188	0.0380629	0.483165	1	3248	tags=27%, list=14%, signal=31%
BYSTRYKH_HEMATOPOIESIS_STEM_CELL_SCP2_QTL_TRANS	BYSTRYKH_HEMATOPOIESIS_STEM_CELL_SCP2_QTL_TRANS		24	-0.488886	-1.32184	0.114745	0.481168	1	1790	tags=21%, list=8%, signal=23%
PLASARI_TGFB1_SIGNALING_VIA_NFIC_10HR_UP	PLASARI_TGFB1_SIGNALING_VIA_NFIC_10HR_UP		50	-0.417882	-1.3218	0.0810613	0.479205	1	2909	tags=30%, list=12%, signal=34%
REACTOME_ADHERENS_JUNCTIONS_INTERACTIONS	REACTOME_ADHERENS_JUNCTIONS_INTERACTIONS		27	-0.472848	-1.32108	0.103249	0.479398	1	1363	tags=19%, list=6%, signal=20%
BIOCARTA_STEM_PATHWAY	BIOCARTA_STEM_PATHWAY		15	-0.548114	-1.32091	0.131479	0.477898	1	3746	tags=33%, list=16%, signal=40%
RODRIGUES_NTN1_AND_DCC_TARGETS	RODRIGUES_NTN1_AND_DCC_TARGETS		31	-0.459388	-1.31929	0.102097	0.480923	1	3002	tags=35%, list=13%, signal=41%
BURTON_ADIPOGENESIS_11	BURTON_ADIPOGENESIS_11		51	-0.414521	-1.31881	0.0754544	0.480437	1	4424	tags=37%, list=19%, signal=46%
KEGG_MELANOMA	KEGG_MELANOMA		68	-0.394136	-1.31876	0.0715952	0.478551	1	2120	tags=21%, list=9%, signal=23%
REACTOME_SIGNALING_BY_FGFR1_MUTANTS	REACTOME_SIGNALING_BY_FGFR1_MUTANTS		28	-0.469485	-1.31818	0.110258	0.478316	1	2985	tags=25%, list=13%, signal=29%
DACOSTA_ERCC3_ALLELE_XPCS_VS_TTD_UP	DACOSTA_ERCC3_ALLELE_XPCS_VS_TTD_UP		26	-0.47717	-1.3179	0.107076	0.477221	1	6048	tags=54%, list=26%, signal=73%
WATTEL_AUTONOMOUS_THYROID_ADENOMA_DN	WATTEL_AUTONOMOUS_THYROID_ADENOMA_DN		49	-0.417971	-1.31781	0.0847179	0.475485	1	2941	tags=29%, list=13%, signal=33%
XU_GH1_AUTOCRINE_TARGETS_DN	XU_GH1_AUTOCRINE_TARGETS_DN		125	-0.359149	-1.31757	0.0405477	0.474233	1	3678	tags=27%, list=16%, signal=32%
REACTOME_NCAM1_INTERACTIONS	REACTOME_NCAM1_INTERACTIONS		39	-0.437299	-1.31672	0.0943044	0.474888	1	2526	tags=31%, list=11%, signal=34%
WANG_LSD1_TARGETS_DN	WANG_LSD1_TARGETS_DN		38	-0.440189	-1.31624	0.0963788	0.474366	1	2514	tags=29%, list=11%, signal=32%
ABBUD_LIF_SIGNALING_1_UP	ABBUD_LIF_SIGNALING_1_UP		43	-0.428153	-1.3162	0.0878192	0.472548	1	2177	tags=19%, list=9%, signal=20%
REACTOME_SIGNALING_BY_HIPPO	REACTOME_SIGNALING_BY_HIPPO		20	-0.50573	-1.31608	0.128996	0.470967	1	4074	tags=50%, list=17%, signal=60%
LIM_MAMMARY_STEM_CELL_UP	LIM_MAMMARY_STEM_CELL_UP		459	-0.311767	-1.31608	0.00485751	0.469046	1	3811	tags=27%, list=16%, signal=32%
BOSCO_INTERFERON_INDUCED_ANTIVIRAL_MODULE	BOSCO_INTERFERON_INDUCED_ANTIVIRAL_MODULE		66	-0.395293	-1.31562	0.0646505	0.468549	1	4339	tags=38%, list=19%, signal=46%
ZWANG_CLASS_2_TRANSIENTLY_INDUCED_BY_EGF	ZWANG_CLASS_2_TRANSIENTLY_INDUCED_BY_EGF		41	-0.430958	-1.31562	0.0899908	0.466658	1	1315	tags=24%, list=6%, signal=26%
KEGG_ETHER_LIPID_METABOLISM	KEGG_ETHER_LIPID_METABOLISM		32	-0.453988	-1.31418	0.101682	0.469212	1	3400	tags=31%, list=15%, signal=37%
LEE_LIVER_CANCER_MYC_E2F1_UP	LEE_LIVER_CANCER_MYC_E2F1_UP		53	-0.410856	-1.31399	0.0772306	0.467898	1	2547	tags=32%, list=11%, signal=36%
MORI_LARGE_PRE_BII_LYMPHOCYTE_DN	MORI_LARGE_PRE_BII_LYMPHOCYTE_DN		52	-0.410459	-1.31308	0.081086	0.468846	1	1718	tags=21%, list=7%, signal=23%
HASLINGER_B_CLL_WITH_CHROMOSOME_12_TRISOMY	HASLINGER_B_CLL_WITH_CHROMOSOME_12_TRISOMY		23	-0.487896	-1.31282	0.120751	0.46775	1	1077	tags=17%, list=5%, signal=18%
MAHADEVAN_IMATINIB_RESISTANCE_UP	MAHADEVAN_IMATINIB_RESISTANCE_UP		17	-0.524815	-1.3101	0.135084	0.474253	1	128	tags=12%, list=1%, signal=12%
WILENSKY_RESPONSE_TO_DARAPLADIB	WILENSKY_RESPONSE_TO_DARAPLADIB		28	-0.465752	-1.30973	0.111858	0.473508	1	1759	tags=29%, list=8%, signal=31%
VANTVEER_BREAST_CANCER_BRCA1_UP	VANTVEER_BREAST_CANCER_BRCA1_UP		31	-0.457938	-1.30968	0.108624	0.471792	1	1303	tags=23%, list=6%, signal=24%
REACTOME_SPHINGOLIPID_DE_NOVO_BIOSYNTHESIS	REACTOME_SPHINGOLIPID_DE_NOVO_BIOSYNTHESIS		30	-0.457769	-1.30938	0.11021	0.47086	1	2182	tags=30%, list=9%, signal=33%
AMIT_DELAYED_EARLY_GENES	AMIT_DELAYED_EARLY_GENES		18	-0.519431	-1.30752	0.137029	0.474739	1	5904	tags=56%, list=25%, signal=74%
STAMBOLSKY_TARGETS_OF_MUTATED_TP53_DN	STAMBOLSKY_TARGETS_OF_MUTATED_TP53_DN		41	-0.431459	-1.30703	0.0957721	0.474397	1	2493	tags=29%, list=11%, signal=33%
HIRSCH_CELLULAR_TRANSFORMATION_SIGNATURE_UP	HIRSCH_CELLULAR_TRANSFORMATION_SIGNATURE_UP		224	-0.331739	-1.30634	0.0238217	0.47463	1	3355	tags=26%, list=14%, signal=30%
PID_NFAT_TFPATHWAY	PID_NFAT_TFPATHWAY		46	-0.419297	-1.30552	0.0934423	0.475344	1	3497	tags=33%, list=15%, signal=38%
REACTOME_CYTOKINE_SIGNALING_IN_IMMUNE_SYSTEM	REACTOME_CYTOKINE_SIGNALING_IN_IMMUNE_SYSTEM		231	-0.330387	-1.30547	0.0213625	0.473647	1	5054	tags=32%, list=22%, signal=40%
LEE_LIVER_CANCER_MYC_DN	LEE_LIVER_CANCER_MYC_DN		55	-0.403821	-1.30488	0.0874886	0.473624	1	4231	tags=27%, list=18%, signal=33%
ROSS_AML_WITH_PML_RARA_FUSION	ROSS_AML_WITH_PML_RARA_FUSION		72	-0.385929	-1.30428	0.0701114	0.473653	1	2661	tags=24%, list=11%, signal=27%
PARK_TRETINOIN_RESPONSE_AND_PML_RARA_FUSION	PARK_TRETINOIN_RESPONSE_AND_PML_RARA_FUSION		29	-0.460524	-1.30396	0.124371	0.472829	1	1650	tags=21%, list=7%, signal=22%
NAKAMURA_ADIPOGENESIS_LATE_DN	NAKAMURA_ADIPOGENESIS_LATE_DN		36	-0.438938	-1.30107	0.0996155	0.479952	1	3301	tags=36%, list=14%, signal=42%
HERNANDEZ_ABERRANT_MITOSIS_BY_DOCETACEL_2NM_UP	HERNANDEZ_ABERRANT_MITOSIS_BY_DOCETACEL_2NM_UP		75	-0.38359	-1.29962	0.0708915	0.482661	1	2558	tags=27%, list=11%, signal=30%
ST_INTERLEUKIN_4_PATHWAY	ST_INTERLEUKIN_4_PATHWAY		23	-0.486069	-1.2984	0.128936	0.484626	1	6838	tags=61%, list=29%, signal=86%
SOTIRIOU_BREAST_CANCER_GRADE_1_VS_3_DN	SOTIRIOU_BREAST_CANCER_GRADE_1_VS_3_DN		45	-0.419969	-1.29787	0.0972532	0.484422	1	1179	tags=18%, list=5%, signal=19%
REACTOME_RORA_ACTIVATES_CIRCADIAN_EXPRESSION	REACTOME_RORA_ACTIVATES_CIRCADIAN_EXPRESSION		23	-0.480633	-1.2971	0.12987	0.485043	1	3160	tags=39%, list=13%, signal=45%
LIANG_SILENCED_BY_METHYLATION_2	LIANG_SILENCED_BY_METHYLATION_2		47	-0.413732	-1.29646	0.0999633	0.485247	1	1314	tags=23%, list=6%, signal=25%
GAL_LEUKEMIC_STEM_CELL_UP	GAL_LEUKEMIC_STEM_CELL_UP		120	-0.355145	-1.29543	0.0519135	0.486643	1	4196	tags=33%, list=18%, signal=40%
BHAT_ESR1_TARGETS_VIA_AKT1_DN	BHAT_ESR1_TARGETS_VIA_AKT1_DN		77	-0.379579	-1.29468	0.0729335	0.487162	1	4301	tags=30%, list=18%, signal=36%
REACTOME_INSULIN_SYNTHESIS_AND_PROCESSING	REACTOME_INSULIN_SYNTHESIS_AND_PROCESSING		19	-0.503721	-1.29392	0.140243	0.487787	1	3845	tags=42%, list=16%, signal=50%
BOYAULT_LIVER_CANCER_SUBCLASS_G56_DN	BOYAULT_LIVER_CANCER_SUBCLASS_G56_DN		16	-0.523759	-1.29287	0.151953	0.489264	1	515	tags=19%, list=2%, signal=19%
ZHANG_ANTIVIRAL_RESPONSE_TO_RIBAVIRIN_UP	ZHANG_ANTIVIRAL_RESPONSE_TO_RIBAVIRIN_UP		25	-0.471648	-1.2925	0.133132	0.48863	1	1836	tags=20%, list=8%, signal=22%
KEGG_SPHINGOLIPID_METABOLISM	KEGG_SPHINGOLIPID_METABOLISM		38	-0.43211	-1.2921	0.108687	0.488074	1	2362	tags=29%, list=10%, signal=32%
MIKKELSEN_ES_ICP_WITH_H3K4ME3_AND_H3K27ME3	MIKKELSEN_ES_ICP_WITH_H3K4ME3_AND_H3K27ME3		125	-0.350586	-1.28983	0.0514469	0.493334	1	4222	tags=29%, list=18%, signal=35%
SCHUETZ_BREAST_CANCER_DUCTAL_INVASIVE_UP	SCHUETZ_BREAST_CANCER_DUCTAL_INVASIVE_UP		310	-0.316357	-1.2889	0.0175584	0.494481	1	3017	tags=25%, list=13%, signal=28%
XU_RESPONSE_TO_TRETINOIN_AND_NSC682994_UP	XU_RESPONSE_TO_TRETINOIN_AND_NSC682994_UP		16	-0.528229	-1.28885	0.153598	0.492838	1	3042	tags=31%, list=13%, signal=36%
CERVERA_SDHB_TARGETS_2	CERVERA_SDHB_TARGETS_2		104	-0.36024	-1.28799	0.061925	0.493817	1	2994	tags=22%, list=13%, signal=25%
KHETCHOUMIAN_TRIM24_TARGETS_UP	KHETCHOUMIAN_TRIM24_TARGETS_UP		45	-0.41424	-1.2873	0.10011	0.494209	1	2052	tags=31%, list=9%, signal=34%
SHAFFER_IRF4_MULTIPLE_MYELOMA_PROGRAM	SHAFFER_IRF4_MULTIPLE_MYELOMA_PROGRAM		34	-0.438778	-1.28715	0.116917	0.49293	1	1638	tags=26%, list=7%, signal=28%
BROWNE_HCMV_INFECTION_10HR_UP	BROWNE_HCMV_INFECTION_10HR_UP		86	-0.369498	-1.28679	0.0680359	0.492264	1	4325	tags=35%, list=18%, signal=43%
KEGG_ABC_TRANSPORTERS	KEGG_ABC_TRANSPORTERS		40	-0.424476	-1.28586	0.112266	0.493441	1	5732	tags=52%, list=24%, signal=69%
LUI_THYROID_CANCER_CLUSTER_2	LUI_THYROID_CANCER_CLUSTER_2		38	-0.429267	-1.28577	0.117199	0.491945	1	3253	tags=34%, list=14%, signal=40%
ZHOU_INFLAMMATORY_RESPONSE_LIVE_UP	ZHOU_INFLAMMATORY_RESPONSE_LIVE_UP		409	-0.307473	-1.28566	0.00977995	0.490552	1	5094	tags=30%, list=22%, signal=38%
HADDAD_T_LYMPHOCYTE_AND_NK_PROGENITOR_DN	HADDAD_T_LYMPHOCYTE_AND_NK_PROGENITOR_DN		57	-0.396138	-1.28428	0.0947712	0.493129	1	2226	tags=30%, list=10%, signal=33%
FULCHER_INFLAMMATORY_RESPONSE_LECTIN_VS_LPS_DN	FULCHER_INFLAMMATORY_RESPONSE_LECTIN_VS_LPS_DN		386	-0.309515	-1.28392	0.0131174	0.492544	1	3529	tags=26%, list=15%, signal=30%
RIZ_ERYTHROID_DIFFERENTIATION_HEMGN	RIZ_ERYTHROID_DIFFERENTIATION_HEMGN		30	-0.448436	-1.28366	0.129338	0.491659	1	3885	tags=37%, list=17%, signal=44%
SEITZ_NEOPLASTIC_TRANSFORMATION_BY_8P_DELETION_UP	SEITZ_NEOPLASTIC_TRANSFORMATION_BY_8P_DELETION_UP		66	-0.384428	-1.28343	0.0919769	0.490648	1	2147	tags=23%, list=9%, signal=25%
BOQUEST_STEM_CELL_CULTURED_VS_FRESH_DN	BOQUEST_STEM_CELL_CULTURED_VS_FRESH_DN		29	-0.451021	-1.28338	0.126665	0.489104	1	4301	tags=34%, list=18%, signal=42%
FLECHNER_BIOPSY_KIDNEY_TRANSPLANT_REJECTED_VS_OK_UP	FLECHNER_BIOPSY_KIDNEY_TRANSPLANT_REJECTED_VS_OK_UP		80	-0.371151	-1.28184	0.0764717	0.492223	1	2551	tags=28%, list=11%, signal=31%
YAUCH_HEDGEHOG_SIGNALING_PARACRINE_DN	YAUCH_HEDGEHOG_SIGNALING_PARACRINE_DN		237	-0.322837	-1.28034	0.0280672	0.495207	1	3166	tags=23%, list=14%, signal=27%
STAMBOLSKY_TARGETS_OF_MUTATED_TP53_UP	STAMBOLSKY_TARGETS_OF_MUTATED_TP53_UP		43	-0.413811	-1.27977	0.113738	0.495249	1	1033	tags=14%, list=4%, signal=15%
ZHOU_INFLAMMATORY_RESPONSE_FIMA_UP	ZHOU_INFLAMMATORY_RESPONSE_FIMA_UP		436	-0.304058	-1.2782	0.0114738	0.498526	1	4280	tags=27%, list=18%, signal=33%
BROWNE_HCMV_INFECTION_30MIN_UP	BROWNE_HCMV_INFECTION_30MIN_UP		45	-0.412423	-1.27706	0.117344	0.500416	1	2526	tags=29%, list=11%, signal=32%
PID_PTP1B_PATHWAY	PID_PTP1B_PATHWAY		48	-0.406498	-1.27591	0.110806	0.502383	1	2391	tags=25%, list=10%, signal=28%
PID_ERBB4_PATHWAY	PID_ERBB4_PATHWAY		38	-0.426351	-1.27433	0.119315	0.505687	1	2833	tags=24%, list=12%, signal=27%
BIOCARTA_ATRBRCA_PATHWAY	BIOCARTA_ATRBRCA_PATHWAY		20	-0.486645	-1.27402	0.152029	0.504977	1	1983	tags=20%, list=8%, signal=22%
REACTOME_TRANSPORT_TO_THE_GOLGI_AND_SUBSEQUENT_MODIFICATION	REACTOME_TRANSPORT_TO_THE_GOLGI_AND_SUBSEQUENT_MODIFICATION		32	-0.444149	-1.27397	0.134226	0.503441	1	1580	tags=28%, list=7%, signal=30%
YAGI_AML_FAB_MARKERS	YAGI_AML_FAB_MARKERS		180	-0.332031	-1.27369	0.0437393	0.502631	1	5171	tags=34%, list=22%, signal=44%
GAVIN_PDE3B_TARGETS	GAVIN_PDE3B_TARGETS		20	-0.489	-1.271	0.157077	0.509493	1	2785	tags=35%, list=12%, signal=40%
NAKAMURA_METASTASIS_MODEL_DN	NAKAMURA_METASTASIS_MODEL_DN		41	-0.418751	-1.27007	0.12437	0.510779	1	3506	tags=27%, list=15%, signal=31%
IKEDA_MIR30_TARGETS_UP	IKEDA_MIR30_TARGETS_UP		114	-0.349641	-1.26955	0.0634001	0.510758	1	4763	tags=36%, list=20%, signal=45%
LEE_LIVER_CANCER_DENA_DN	LEE_LIVER_CANCER_DENA_DN		67	-0.379546	-1.2693	0.0958953	0.50985	1	2048	tags=16%, list=9%, signal=18%
REACTOME_ANTIGEN_ACTIVATES_B_CELL_RECEPTOR_LEADING_TO_GENERATION_OF_SECOND_MESSENGERS	REACTOME_ANTIGEN_ACTIVATES_B_CELL_RECEPTOR_LEADING_TO_GENERATION_OF_SECOND_MESSENGERS		29	-0.448056	-1.26927	0.141509	0.508276	1	2660	tags=34%, list=11%, signal=39%
WEIGEL_OXIDATIVE_STRESS_RESPONSE	WEIGEL_OXIDATIVE_STRESS_RESPONSE		33	-0.432872	-1.26915	0.129822	0.507005	1	2649	tags=21%, list=11%, signal=24%
WONG_IFNA2_RESISTANCE_UP	WONG_IFNA2_RESISTANCE_UP		16	-0.515882	-1.26896	0.16727	0.505931	1	2258	tags=31%, list=10%, signal=35%
GRAESSMANN_RESPONSE_TO_MC_AND_SERUM_DEPRIVATION_UP	GRAESSMANN_RESPONSE_TO_MC_AND_SERUM_DEPRIVATION_UP		194	-0.32636	-1.26873	0.0422608	0.505026	1	4904	tags=31%, list=21%, signal=39%
KIM_MYCL1_AMPLIFICATION_TARGETS_DN	KIM_MYCL1_AMPLIFICATION_TARGETS_DN		17	-0.507225	-1.26795	0.169067	0.505826	1	1279	tags=29%, list=5%, signal=31%
SAKAI_TUMOR_INFILTRATING_MONOCYTES_UP	SAKAI_TUMOR_INFILTRATING_MONOCYTES_UP		26	-0.461947	-1.26787	0.146862	0.504455	1	3381	tags=31%, list=14%, signal=36%
SMID_BREAST_CANCER_LUMINAL_A_UP	SMID_BREAST_CANCER_LUMINAL_A_UP		76	-0.371068	-1.26772	0.0914223	0.503315	1	4111	tags=32%, list=18%, signal=38%
SHIN_B_CELL_LYMPHOMA_CLUSTER_7	SHIN_B_CELL_LYMPHOMA_CLUSTER_7		27	-0.455494	-1.26687	0.14906	0.504343	1	3528	tags=41%, list=15%, signal=48%
LEE_LIVER_CANCER_CIPROFIBRATE_DN	LEE_LIVER_CANCER_CIPROFIBRATE_DN		59	-0.386323	-1.26674	0.101162	0.503116	1	1963	tags=17%, list=8%, signal=18%
WANG_RESPONSE_TO_GSK3_INHIBITOR_SB216763_UP	WANG_RESPONSE_TO_GSK3_INHIBITOR_SB216763_UP		288	-0.312849	-1.26626	0.0263685	0.503019	1	5535	tags=34%, list=24%, signal=44%
MIKKELSEN_MEF_ICP_WITH_H3K4ME3_AND_H3K27ME3	MIKKELSEN_MEF_ICP_WITH_H3K4ME3_AND_H3K27ME3		38	-0.421786	-1.26592	0.131407	0.502499	1	5885	tags=45%, list=25%, signal=60%
KORKOLA_EMBRYONIC_CARCINOMA_VS_SEMINOMA_UP	KORKOLA_EMBRYONIC_CARCINOMA_VS_SEMINOMA_UP		20	-0.488144	-1.2658	0.158899	0.50129	1	5190	tags=45%, list=22%, signal=58%
LINDGREN_BLADDER_CANCER_CLUSTER_2B	LINDGREN_BLADDER_CANCER_CLUSTER_2B		343	-0.307867	-1.26561	0.0206441	0.500296	1	2560	tags=22%, list=11%, signal=24%
PEREZ_TP53_AND_TP63_TARGETS	PEREZ_TP53_AND_TP63_TARGETS		179	-0.328666	-1.26492	0.0456731	0.500853	1	4128	tags=32%, list=18%, signal=38%
BROWNE_HCMV_INFECTION_16HR_DN	BROWNE_HCMV_INFECTION_16HR_DN		72	-0.373673	-1.26445	0.0906608	0.50074	1	3244	tags=28%, list=14%, signal=32%
MEISSNER_NPC_HCP_WITH_H3K4ME2_AND_H3K27ME3	MEISSNER_NPC_HCP_WITH_H3K4ME2_AND_H3K27ME3		330	-0.308533	-1.26419	0.0208573	0.499986	1	5185	tags=26%, list=22%, signal=33%
KOHOUTEK_CCNT1_TARGETS	KOHOUTEK_CCNT1_TARGETS		45	-0.406858	-1.26384	0.120712	0.499484	1	4538	tags=33%, list=19%, signal=41%
NABA_COLLAGENS	NABA_COLLAGENS		43	-0.411557	-1.26368	0.129616	0.498432	1	6327	tags=51%, list=27%, signal=70%
LEE_LIVER_CANCER_E2F1_DN	LEE_LIVER_CANCER_E2F1_DN		58	-0.388823	-1.2634	0.104178	0.497755	1	1235	tags=14%, list=5%, signal=15%
CHEOK_RESPONSE_TO_MERCAPTOPURINE_AND_LD_MTX_DN	CHEOK_RESPONSE_TO_MERCAPTOPURINE_AND_LD_MTX_DN		17	-0.503652	-1.26221	0.175903	0.499927	1	3395	tags=29%, list=14%, signal=34%
ROZANOV_MMP14_TARGETS_UP	ROZANOV_MMP14_TARGETS_UP		237	-0.318167	-1.2617	0.0345754	0.49994	1	3028	tags=24%, list=13%, signal=27%
MCLACHLAN_DENTAL_CARIES_UP	MCLACHLAN_DENTAL_CARIES_UP		202	-0.322398	-1.26079	0.0421542	0.501219	1	1776	tags=17%, list=8%, signal=19%
BROWN_MYELOID_CELL_DEVELOPMENT_UP	BROWN_MYELOID_CELL_DEVELOPMENT_UP		142	-0.337603	-1.26043	0.0581416	0.500794	1	1890	tags=21%, list=8%, signal=23%
MIYAGAWA_TARGETS_OF_EWSR1_ETS_FUSIONS_DN	MIYAGAWA_TARGETS_OF_EWSR1_ETS_FUSIONS_DN		196	-0.325037	-1.25949	0.04191	0.502155	1	3037	tags=23%, list=13%, signal=27%
DACOSTA_UV_RESPONSE_VIA_ERCC3_COMMON_DN	DACOSTA_UV_RESPONSE_VIA_ERCC3_COMMON_DN		452	-0.298576	-1.25708	0.0163593	0.508122	1	5753	tags=36%, list=25%, signal=47%
MCBRYAN_PUBERTAL_BREAST_3_4WK_UP	MCBRYAN_PUBERTAL_BREAST_3_4WK_UP		199	-0.322238	-1.25674	0.04252	0.507645	1	4124	tags=28%, list=18%, signal=34%
REACTOME_SIGNALING_BY_FGFR_MUTANTS	REACTOME_SIGNALING_BY_FGFR_MUTANTS		41	-0.415403	-1.25658	0.1381	0.506626	1	5606	tags=34%, list=24%, signal=45%
BILBAN_B_CLL_LPL_DN	BILBAN_B_CLL_LPL_DN		38	-0.418142	-1.25547	0.135056	0.508571	1	2524	tags=34%, list=11%, signal=38%
ABE_VEGFA_TARGETS	ABE_VEGFA_TARGETS		19	-0.487256	-1.25544	0.170886	0.50713	1	3448	tags=37%, list=15%, signal=43%
LE_SKI_TARGETS_UP	LE_SKI_TARGETS_UP		16	-0.513118	-1.25526	0.182642	0.506148	1	2396	tags=31%, list=10%, signal=35%
CROONQUIST_STROMAL_STIMULATION_UP	CROONQUIST_STROMAL_STIMULATION_UP		56	-0.388583	-1.25468	0.118436	0.506431	1	3116	tags=29%, list=13%, signal=33%
NOUZOVA_METHYLATED_IN_APL	NOUZOVA_METHYLATED_IN_APL		55	-0.388454	-1.25454	0.11785	0.505352	1	1838	tags=22%, list=8%, signal=24%
YAO_HOXA10_TARGETS_VIA_PROGESTERONE_UP	YAO_HOXA10_TARGETS_VIA_PROGESTERONE_UP		72	-0.369945	-1.2542	0.101664	0.504905	1	2765	tags=29%, list=12%, signal=33%
ST_WNT_CA2_CYCLIC_GMP_PATHWAY	ST_WNT_CA2_CYCLIC_GMP_PATHWAY		19	-0.488985	-1.25218	0.171692	0.509686	1	3941	tags=42%, list=17%, signal=51%
COATES_MACROPHAGE_M1_VS_M2_UP	COATES_MACROPHAGE_M1_VS_M2_UP		75	-0.36872	-1.25214	0.100987	0.508283	1	3127	tags=27%, list=13%, signal=31%
PID_ANGIOPOIETIN_RECEPTOR_PATHWAY	PID_ANGIOPOIETIN_RECEPTOR_PATHWAY		49	-0.395116	-1.2503	0.125367	0.512492	1	2391	tags=22%, list=10%, signal=25%
FURUKAWA_DUSP6_TARGETS_PCI35_UP	FURUKAWA_DUSP6_TARGETS_PCI35_UP		55	-0.387399	-1.24949	0.120526	0.513552	1	4113	tags=29%, list=18%, signal=35%
AZARE_NEOPLASTIC_TRANSFORMATION_BY_STAT3_DN	AZARE_NEOPLASTIC_TRANSFORMATION_BY_STAT3_DN		16	-0.511887	-1.24931	0.182053	0.512576	1	5162	tags=44%, list=22%, signal=56%
PID_PDGFRB_PATHWAY	PID_PDGFRB_PATHWAY		127	-0.33972	-1.24913	0.0752197	0.511655	1	1880	tags=20%, list=8%, signal=22%
REACTOME_ABCA_TRANSPORTERS_IN_LIPID_HOMEOSTASIS	REACTOME_ABCA_TRANSPORTERS_IN_LIPID_HOMEOSTASIS		16	-0.508247	-1.24908	0.185481	0.510312	1	5732	tags=69%, list=24%, signal=91%
PLASARI_NFIC_TARGETS_BASAL_UP	PLASARI_NFIC_TARGETS_BASAL_UP		26	-0.453023	-1.24875	0.162747	0.509861	1	3338	tags=27%, list=14%, signal=31%
SMID_BREAST_CANCER_LUMINAL_B_DN	SMID_BREAST_CANCER_LUMINAL_B_DN		488	-0.293682	-1.24681	0.0154889	0.514419	1	1975	tags=16%, list=8%, signal=17%
GALINDO_IMMUNE_RESPONSE_TO_ENTEROTOXIN	GALINDO_IMMUNE_RESPONSE_TO_ENTEROTOXIN		79	-0.363676	-1.24644	0.107799	0.514112	1	2514	tags=27%, list=11%, signal=30%
HOELZEL_NF1_TARGETS_DN	HOELZEL_NF1_TARGETS_DN		100	-0.35052	-1.24582	0.0931765	0.514581	1	4912	tags=34%, list=21%, signal=43%
MCLACHLAN_DENTAL_CARIES_DN	MCLACHLAN_DENTAL_CARIES_DN		75	-0.366185	-1.24196	0.114068	0.525189	1	1706	tags=16%, list=7%, signal=17%
HOOI_ST7_TARGETS_UP	HOOI_ST7_TARGETS_UP		75	-0.36491	-1.24156	0.112471	0.524956	1	2860	tags=23%, list=12%, signal=26%
MOLENAAR_TARGETS_OF_CCND1_AND_CDK4_UP	MOLENAAR_TARGETS_OF_CCND1_AND_CDK4_UP		52	-0.389341	-1.24149	0.137284	0.523689	1	4206	tags=31%, list=18%, signal=37%
SARTIPY_BLUNTED_BY_INSULIN_RESISTANCE_UP	SARTIPY_BLUNTED_BY_INSULIN_RESISTANCE_UP		18	-0.491627	-1.24125	0.182654	0.522938	1	5231	tags=50%, list=22%, signal=64%
CERVERA_SDHB_TARGETS_1_UP	CERVERA_SDHB_TARGETS_1_UP		106	-0.345191	-1.2405	0.0926786	0.523862	1	2209	tags=18%, list=9%, signal=20%
SMID_BREAST_CANCER_RELAPSE_IN_PLEURA_DN	SMID_BREAST_CANCER_RELAPSE_IN_PLEURA_DN		19	-0.485447	-1.24013	0.181938	0.523578	1	5478	tags=42%, list=23%, signal=55%
CHIARADONNA_NEOPLASTIC_TRANSFORMATION_KRAS_CDC25_DN	CHIARADONNA_NEOPLASTIC_TRANSFORMATION_KRAS_CDC25_DN		49	-0.3936	-1.23917	0.131832	0.525137	1	4677	tags=39%, list=20%, signal=48%
BIOCARTA_RELA_PATHWAY	BIOCARTA_RELA_PATHWAY		16	-0.507907	-1.23905	0.18874	0.524029	1	4595	tags=38%, list=20%, signal=47%
BOYLAN_MULTIPLE_MYELOMA_PCA3_UP	BOYLAN_MULTIPLE_MYELOMA_PCA3_UP		71	-0.369122	-1.23824	0.12046	0.525153	1	2700	tags=28%, list=12%, signal=32%
KOHOUTEK_CCNT2_TARGETS	KOHOUTEK_CCNT2_TARGETS		53	-0.38687	-1.2375	0.135264	0.525984	1	4023	tags=28%, list=17%, signal=34%
HELLER_HDAC_TARGETS_SILENCED_BY_METHYLATION_DN	HELLER_HDAC_TARGETS_SILENCED_BY_METHYLATION_DN		250	-0.309423	-1.23722	0.0468803	0.525401	1	3689	tags=25%, list=16%, signal=29%
GABRIELY_MIR21_TARGETS	GABRIELY_MIR21_TARGETS		268	-0.308123	-1.23708	0.0423083	0.524401	1	4206	tags=26%, list=18%, signal=31%
LEE_LIVER_CANCER_CIPROFIBRATE_UP	LEE_LIVER_CANCER_CIPROFIBRATE_UP		58	-0.381142	-1.23689	0.126789	0.523534	1	2065	tags=19%, list=9%, signal=21%
SETLUR_PROSTATE_CANCER_TMPRSS2_ERG_FUSION_DN	SETLUR_PROSTATE_CANCER_TMPRSS2_ERG_FUSION_DN		18	-0.48878	-1.23687	0.192032	0.522135	1	2945	tags=28%, list=13%, signal=32%
PYEON_CANCER_HEAD_AND_NECK_VS_CERVICAL_DN	PYEON_CANCER_HEAD_AND_NECK_VS_CERVICAL_DN		23	-0.458949	-1.23626	0.180413	0.522593	1	3251	tags=17%, list=14%, signal=20%
VALK_AML_CLUSTER_6	VALK_AML_CLUSTER_6		30	-0.433771	-1.23588	0.160754	0.522376	1	1680	tags=17%, list=7%, signal=18%
CHIARETTI_ACUTE_LYMPHOBLASTIC_LEUKEMIA_ZAP70	CHIARETTI_ACUTE_LYMPHOBLASTIC_LEUKEMIA_ZAP70		59	-0.376762	-1.23574	0.125795	0.521404	1	4433	tags=29%, list=19%, signal=35%
MEISSNER_NPC_HCP_WITH_H3K4ME2	MEISSNER_NPC_HCP_WITH_H3K4ME2		460	-0.293128	-1.23505	0.0232188	0.522128	1	3796	tags=24%, list=16%, signal=28%
GROSS_HYPOXIA_VIA_ELK3_ONLY_UP	GROSS_HYPOXIA_VIA_ELK3_ONLY_UP		32	-0.428055	-1.23356	0.17401	0.525375	1	4074	tags=38%, list=17%, signal=45%
LIM_MAMMARY_LUMINAL_PROGENITOR_UP	LIM_MAMMARY_LUMINAL_PROGENITOR_UP		53	-0.384268	-1.2331	0.138539	0.525403	1	3438	tags=26%, list=15%, signal=31%
GRAHAM_NORMAL_QUIESCENT_VS_NORMAL_DIVIDING_UP	GRAHAM_NORMAL_QUIESCENT_VS_NORMAL_DIVIDING_UP		64	-0.372792	-1.2329	0.130675	0.524615	1	1466	tags=23%, list=6%, signal=25%
TAKEDA_TARGETS_OF_NUP98_HOXA9_FUSION_16D_DN	TAKEDA_TARGETS_OF_NUP98_HOXA9_FUSION_16D_DN		109	-0.340973	-1.23198	0.0943164	0.526125	1	5529	tags=42%, list=24%, signal=55%
REACTOME_CHONDROITIN_SULFATE_DERMATAN_SULFATE_METABOLISM	REACTOME_CHONDROITIN_SULFATE_DERMATAN_SULFATE_METABOLISM		47	-0.393165	-1.23108	0.146248	0.527573	1	2006	tags=28%, list=9%, signal=30%
PID_SYNDECAN_2_PATHWAY	PID_SYNDECAN_2_PATHWAY		31	-0.426669	-1.23066	0.163411	0.527478	1	650	tags=10%, list=3%, signal=10%
TARTE_PLASMA_CELL_VS_B_LYMPHOCYTE_DN	TARTE_PLASMA_CELL_VS_B_LYMPHOCYTE_DN		32	-0.424862	-1.22865	0.1721	0.532408	1	4658	tags=34%, list=20%, signal=43%
KORKOLA_CORRELATED_WITH_POU5F1	KORKOLA_CORRELATED_WITH_POU5F1		27	-0.439387	-1.2276	0.167567	0.534329	1	5481	tags=44%, list=23%, signal=58%
PID_NEPHRIN_NEPH1_PATHWAY	PID_NEPHRIN_NEPH1_PATHWAY		31	-0.428277	-1.2264	0.168949	0.536744	1	1778	tags=23%, list=8%, signal=24%
CERIBELLI_GENES_INACTIVE_AND_BOUND_BY_NFY	CERIBELLI_GENES_INACTIVE_AND_BOUND_BY_NFY		27	-0.438914	-1.22607	0.180667	0.536338	1	5506	tags=48%, list=24%, signal=63%
PEDRIOLI_MIR31_TARGETS_DN	PEDRIOLI_MIR31_TARGETS_DN		347	-0.297527	-1.2252	0.0370913	0.537698	1	4438	tags=27%, list=19%, signal=33%
SHIN_B_CELL_LYMPHOMA_CLUSTER_9	SHIN_B_CELL_LYMPHOMA_CLUSTER_9		19	-0.475636	-1.22486	0.188231	0.537417	1	517	tags=21%, list=2%, signal=22%
PID_P38_MKK3_6PATHWAY	PID_P38_MKK3_6PATHWAY		25	-0.446936	-1.22322	0.189585	0.541266	1	2873	tags=28%, list=12%, signal=32%
LIU_PROSTATE_CANCER_DN	LIU_PROSTATE_CANCER_DN		431	-0.291203	-1.22228	0.0314821	0.542842	1	2633	tags=19%, list=11%, signal=21%
REACTOME_CELL_SURFACE_INTERACTIONS_AT_THE_VASCULAR_WALL	REACTOME_CELL_SURFACE_INTERACTIONS_AT_THE_VASCULAR_WALL		79	-0.354001	-1.22184	0.12652	0.542794	1	1680	tags=23%, list=7%, signal=24%
SETLUR_PROSTATE_CANCER_TMPRSS2_ERG_FUSION_UP	SETLUR_PROSTATE_CANCER_TMPRSS2_ERG_FUSION_UP		64	-0.369076	-1.22169	0.138367	0.541872	1	4557	tags=33%, list=19%, signal=41%
NABA_CORE_MATRISOME	NABA_CORE_MATRISOME		260	-0.303738	-1.22167	0.0528806	0.540509	1	2610	tags=17%, list=11%, signal=18%
SATO_SILENCED_BY_METHYLATION_IN_PANCREATIC_CANCER_1	SATO_SILENCED_BY_METHYLATION_IN_PANCREATIC_CANCER_1		362	-0.295564	-1.22159	0.035865	0.53939	1	2574	tags=18%, list=11%, signal=20%
LABBE_TGFB1_TARGETS_UP	LABBE_TGFB1_TARGETS_UP		96	-0.345264	-1.22083	0.106246	0.540374	1	3240	tags=25%, list=14%, signal=29%
MEISSNER_NPC_HCP_WITH_H3K4ME3_AND_H3K27ME3	MEISSNER_NPC_HCP_WITH_H3K4ME3_AND_H3K27ME3		137	-0.327432	-1.22025	0.0931287	0.540853	1	5163	tags=34%, list=22%, signal=44%
TURASHVILI_BREAST_DUCTAL_CARCINOMA_VS_LOBULAR_NORMAL_DN	TURASHVILI_BREAST_DUCTAL_CARCINOMA_VS_LOBULAR_NORMAL_DN		57	-0.374718	-1.21995	0.141862	0.540369	1	5190	tags=40%, list=22%, signal=52%
NGUYEN_NOTCH1_TARGETS_DN	NGUYEN_NOTCH1_TARGETS_DN		82	-0.353927	-1.21812	0.122356	0.544808	1	4127	tags=30%, list=18%, signal=37%
VALK_AML_CLUSTER_15	VALK_AML_CLUSTER_15		28	-0.432957	-1.21736	0.191311	0.545887	1	2160	tags=32%, list=9%, signal=35%
HUANG_FOXA2_TARGETS_UP	HUANG_FOXA2_TARGETS_UP		43	-0.393255	-1.21679	0.163546	0.546311	1	3521	tags=30%, list=15%, signal=36%
REACTOME_TIE2_SIGNALING	REACTOME_TIE2_SIGNALING		16	-0.494363	-1.21662	0.209	0.545442	1	1071	tags=19%, list=5%, signal=20%
TENEDINI_MEGAKARYOCYTE_MARKERS	TENEDINI_MEGAKARYOCYTE_MARKERS		64	-0.366102	-1.21543	0.140118	0.547848	1	1314	tags=22%, list=6%, signal=23%
AZARE_NEOPLASTIC_TRANSFORMATION_BY_STAT3_UP	AZARE_NEOPLASTIC_TRANSFORMATION_BY_STAT3_UP		106	-0.337574	-1.21413	0.111566	0.550619	1	1718	tags=20%, list=7%, signal=21%
GINESTIER_BREAST_CANCER_20Q13_AMPLIFICATION_DN	GINESTIER_BREAST_CANCER_20Q13_AMPLIFICATION_DN		147	-0.322903	-1.21169	0.0967517	0.557171	1	3818	tags=27%, list=16%, signal=31%
AFFAR_YY1_TARGETS_UP	AFFAR_YY1_TARGETS_UP		204	-0.310571	-1.21162	0.0699145	0.555959	1	3565	tags=24%, list=15%, signal=28%
KEGG_JAK_STAT_SIGNALING_PATHWAY	KEGG_JAK_STAT_SIGNALING_PATHWAY		138	-0.326013	-1.21156	0.105915	0.554751	1	2868	tags=22%, list=12%, signal=25%
WEBER_METHYLATED_HCP_IN_FIBROBLAST_DN	WEBER_METHYLATED_HCP_IN_FIBROBLAST_DN		40	-0.399313	-1.20879	0.172433	0.562379	1	2771	tags=23%, list=12%, signal=25%
NIELSEN_LEIOMYOSARCOMA_CNN1_DN	NIELSEN_LEIOMYOSARCOMA_CNN1_DN		19	-0.473129	-1.2074	0.210606	0.56553	1	2068	tags=37%, list=9%, signal=40%
KAPOSI_LIVER_CANCER_MET_UP	KAPOSI_LIVER_CANCER_MET_UP		17	-0.48387	-1.20725	0.220899	0.564605	1	1667	tags=29%, list=7%, signal=32%
STEGER_ADIPOGENESIS_DN	STEGER_ADIPOGENESIS_DN		25	-0.442152	-1.20713	0.201797	0.563571	1	4547	tags=40%, list=19%, signal=50%
FOSTER_TOLERANT_MACROPHAGE_DN	FOSTER_TOLERANT_MACROPHAGE_DN		382	-0.290365	-1.20637	0.0468724	0.564624	1	4999	tags=34%, list=21%, signal=43%
JOSEPH_RESPONSE_TO_SODIUM_BUTYRATE_DN	JOSEPH_RESPONSE_TO_SODIUM_BUTYRATE_DN		59	-0.369478	-1.20632	0.154615	0.563389	1	2739	tags=25%, list=12%, signal=29%
BIOCARTA_PTDINS_PATHWAY	BIOCARTA_PTDINS_PATHWAY		23	-0.450004	-1.20519	0.200408	0.56564	1	6804	tags=61%, list=29%, signal=86%
SANSOM_WNT_PATHWAY_REQUIRE_MYC	SANSOM_WNT_PATHWAY_REQUIRE_MYC		57	-0.370702	-1.20495	0.159258	0.565025	1	3289	tags=28%, list=14%, signal=33%
VERHAAK_GLIOBLASTOMA_PRONEURAL	VERHAAK_GLIOBLASTOMA_PRONEURAL		161	-0.317423	-1.20477	0.0969201	0.564253	1	3353	tags=24%, list=14%, signal=28%
TURASHVILI_BREAST_LOBULAR_CARCINOMA_VS_LOBULAR_NORMAL_DN	TURASHVILI_BREAST_LOBULAR_CARCINOMA_VS_LOBULAR_NORMAL_DN		69	-0.359068	-1.20467	0.152213	0.563165	1	3405	tags=30%, list=15%, signal=36%
REACTOME_SIGNALING_BY_BMP	REACTOME_SIGNALING_BY_BMP		22	-0.452479	-1.20404	0.210328	0.563836	1	4338	tags=36%, list=19%, signal=45%
KEGG_NICOTINATE_AND_NICOTINAMIDE_METABOLISM	KEGG_NICOTINATE_AND_NICOTINAMIDE_METABOLISM		23	-0.447686	-1.20336	0.20969	0.564647	1	3955	tags=43%, list=17%, signal=52%
SHEDDEN_LUNG_CANCER_GOOD_SURVIVAL_A12	SHEDDEN_LUNG_CANCER_GOOD_SURVIVAL_A12		254	-0.301228	-1.20254	0.0734147	0.565942	1	3637	tags=23%, list=16%, signal=27%
REACTOME_SIGNALING_BY_ILS	REACTOME_SIGNALING_BY_ILS		102	-0.338605	-1.20189	0.134916	0.566686	1	2391	tags=19%, list=10%, signal=21%
QUINTENS_EMBRYONIC_BRAIN_RESPONSE_TO_IR	QUINTENS_EMBRYONIC_BRAIN_RESPONSE_TO_IR		69	-0.360054	-1.20184	0.151328	0.565479	1	4219	tags=33%, list=18%, signal=41%
BONOME_OVARIAN_CANCER_SURVIVAL_SUBOPTIMAL_DEBULKING	BONOME_OVARIAN_CANCER_SURVIVAL_SUBOPTIMAL_DEBULKING		467	-0.284715	-1.2003	0.0368574	0.569137	1	4453	tags=25%, list=19%, signal=31%
SENESE_HDAC1_TARGETS_DN	SENESE_HDAC1_TARGETS_DN		218	-0.304821	-1.20008	0.0832199	0.568486	1	3506	tags=23%, list=15%, signal=27%
PASINI_SUZ12_TARGETS_DN	PASINI_SUZ12_TARGETS_DN		306	-0.294472	-1.19927	0.0612717	0.569753	1	1926	tags=16%, list=8%, signal=18%
PID_INTEGRIN_CS_PATHWAY	PID_INTEGRIN_CS_PATHWAY		26	-0.433815	-1.19829	0.204203	0.571628	1	1885	tags=31%, list=8%, signal=33%
ZWANG_CLASS_3_TRANSIENTLY_INDUCED_BY_EGF	ZWANG_CLASS_3_TRANSIENTLY_INDUCED_BY_EGF		209	-0.30469	-1.19784	0.0815319	0.57172	1	2915	tags=21%, list=12%, signal=24%
DUAN_PRDM5_TARGETS	DUAN_PRDM5_TARGETS		66	-0.360199	-1.19751	0.162279	0.571423	1	2715	tags=24%, list=12%, signal=27%
PID_ECADHERIN_STABILIZATION_PATHWAY	PID_ECADHERIN_STABILIZATION_PATHWAY		40	-0.394045	-1.19732	0.181971	0.570645	1	2858	tags=25%, list=12%, signal=28%
CORRE_MULTIPLE_MYELOMA_UP	CORRE_MULTIPLE_MYELOMA_UP		62	-0.364341	-1.19683	0.1603	0.570904	1	4059	tags=31%, list=17%, signal=37%
SENGUPTA_EBNA1_ANTICORRELATED	SENGUPTA_EBNA1_ANTICORRELATED		129	-0.324849	-1.1961	0.120761	0.571962	1	4305	tags=25%, list=18%, signal=30%
VERRECCHIA_RESPONSE_TO_TGFB1_C5	VERRECCHIA_RESPONSE_TO_TGFB1_C5		21	-0.454253	-1.19519	0.219064	0.573558	1	650	tags=14%, list=3%, signal=15%
HOELZEL_NF1_TARGETS_UP	HOELZEL_NF1_TARGETS_UP		128	-0.324503	-1.19514	0.117769	0.572374	1	4753	tags=32%, list=20%, signal=40%
LIM_MAMMARY_LUMINAL_MATURE_DN	LIM_MAMMARY_LUMINAL_MATURE_DN		95	-0.338583	-1.19512	0.14211	0.571096	1	3679	tags=29%, list=16%, signal=35%
DOANE_BREAST_CANCER_ESR1_DN	DOANE_BREAST_CANCER_ESR1_DN		46	-0.381815	-1.19385	0.182056	0.573942	1	1972	tags=20%, list=8%, signal=21%
CHARAFE_BREAST_CANCER_LUMINAL_VS_MESENCHYMAL_DN	CHARAFE_BREAST_CANCER_LUMINAL_VS_MESENCHYMAL_DN		431	-0.28446	-1.19376	0.0502741	0.572868	1	3221	tags=22%, list=14%, signal=25%
PID_LPA4_PATHWAY	PID_LPA4_PATHWAY		15	-0.492089	-1.19331	0.23474	0.572978	1	8425	tags=67%, list=36%, signal=104%
GOLDRATH_IMMUNE_MEMORY	GOLDRATH_IMMUNE_MEMORY		59	-0.365945	-1.19269	0.166939	0.573671	1	3944	tags=34%, list=17%, signal=41%
REN_ALVEOLAR_RHABDOMYOSARCOMA_UP	REN_ALVEOLAR_RHABDOMYOSARCOMA_UP		96	-0.336164	-1.19186	0.138944	0.575071	1	5568	tags=40%, list=24%, signal=52%
HUTTMANN_B_CLL_POOR_SURVIVAL_UP	HUTTMANN_B_CLL_POOR_SURVIVAL_UP		243	-0.298849	-1.19158	0.0805164	0.574674	1	2730	tags=21%, list=12%, signal=24%
SANSOM_APC_TARGETS_DN	SANSOM_APC_TARGETS_DN		339	-0.289434	-1.19143	0.0603122	0.573833	1	4034	tags=24%, list=17%, signal=28%
BUCKANOVICH_T_LYMPHOCYTE_HOMING_ON_TUMOR_DN	BUCKANOVICH_T_LYMPHOCYTE_HOMING_ON_TUMOR_DN		20	-0.459927	-1.1904	0.224727	0.575867	1	1635	tags=20%, list=7%, signal=21%
MCMURRAY_TP53_HRAS_COOPERATION_RESPONSE_UP	MCMURRAY_TP53_HRAS_COOPERATION_RESPONSE_UP		25	-0.433822	-1.19035	0.210006	0.574721	1	2061	tags=20%, list=9%, signal=22%
ZHANG_RESPONSE_TO_IKK_INHIBITOR_AND_TNF_UP	ZHANG_RESPONSE_TO_IKK_INHIBITOR_AND_TNF_UP		199	-0.305219	-1.18926	0.0930553	0.576955	1	4333	tags=29%, list=19%, signal=35%
REACTOME_GENERIC_TRANSCRIPTION_PATHWAY	REACTOME_GENERIC_TRANSCRIPTION_PATHWAY		143	-0.31727	-1.18912	0.118981	0.576056	1	2276	tags=20%, list=10%, signal=22%
KEGG_FC_GAMMA_R_MEDIATED_PHAGOCYTOSIS	KEGG_FC_GAMMA_R_MEDIATED_PHAGOCYTOSIS		92	-0.339249	-1.18892	0.146979	0.575385	1	2660	tags=26%, list=11%, signal=29%
VARELA_ZMPSTE24_TARGETS_UP	VARELA_ZMPSTE24_TARGETS_UP		37	-0.397642	-1.18845	0.197283	0.575619	1	5289	tags=41%, list=23%, signal=52%
NAKAMURA_ADIPOGENESIS_EARLY_DN	NAKAMURA_ADIPOGENESIS_EARLY_DN		37	-0.399704	-1.18812	0.205086	0.575418	1	3338	tags=35%, list=14%, signal=41%
WORSCHECH_TUMOR_EVASION_AND_TOLEROGENICITY_UP	WORSCHECH_TUMOR_EVASION_AND_TOLEROGENICITY_UP		30	-0.414312	-1.18781	0.210145	0.575074	1	764	tags=17%, list=3%, signal=17%
MIKKELSEN_ES_ICP_WITH_H3K27ME3	MIKKELSEN_ES_ICP_WITH_H3K27ME3		40	-0.394546	-1.18762	0.190265	0.574406	1	3941	tags=23%, list=17%, signal=27%
GAVIN_FOXP3_TARGETS_CLUSTER_P2	GAVIN_FOXP3_TARGETS_CLUSTER_P2		73	-0.352066	-1.18706	0.16294	0.57492	1	3592	tags=29%, list=15%, signal=34%
NAKAYAMA_FRA2_TARGETS	NAKAYAMA_FRA2_TARGETS		38	-0.395866	-1.18706	0.196063	0.573614	1	3461	tags=37%, list=15%, signal=43%
HELLER_SILENCED_BY_METHYLATION_UP	HELLER_SILENCED_BY_METHYLATION_UP		243	-0.297734	-1.18671	0.0839209	0.573434	1	2749	tags=21%, list=12%, signal=23%
HANSON_HRAS_SIGNALING_VIA_NFKB	HANSON_HRAS_SIGNALING_VIA_NFKB		21	-0.450273	-1.18555	0.227059	0.575953	1	5597	tags=52%, list=24%, signal=69%
MIKKELSEN_IPS_LCP_WITH_H3K4ME3	MIKKELSEN_IPS_LCP_WITH_H3K4ME3		150	-0.314116	-1.18554	0.119227	0.57466	1	2493	tags=17%, list=11%, signal=19%
EBAUER_MYOGENIC_TARGETS_OF_PAX3_FOXO1_FUSION	EBAUER_MYOGENIC_TARGETS_OF_PAX3_FOXO1_FUSION		49	-0.377319	-1.18489	0.189831	0.57552	1	5383	tags=41%, list=23%, signal=53%
NABA_ECM_AFFILIATED	NABA_ECM_AFFILIATED		136	-0.318626	-1.18484	0.12766	0.574406	1	2890	tags=21%, list=12%, signal=24%
LI_INDUCED_T_TO_NATURAL_KILLER_UP	LI_INDUCED_T_TO_NATURAL_KILLER_UP		281	-0.294025	-1.18449	0.0832919	0.574249	1	2706	tags=21%, list=12%, signal=24%
BOYLAN_MULTIPLE_MYELOMA_D_DN	BOYLAN_MULTIPLE_MYELOMA_D_DN		72	-0.351029	-1.18444	0.167145	0.573132	1	2052	tags=26%, list=9%, signal=29%
KEGG_PATHWAYS_IN_CANCER	KEGG_PATHWAYS_IN_CANCER		314	-0.289485	-1.18418	0.0734761	0.572715	1	3033	tags=21%, list=13%, signal=24%
CHEN_LVAD_SUPPORT_OF_FAILING_HEART_UP	CHEN_LVAD_SUPPORT_OF_FAILING_HEART_UP		90	-0.336771	-1.18306	0.153804	0.575069	1	2106	tags=20%, list=9%, signal=22%
CROONQUIST_NRAS_VS_STROMAL_STIMULATION_UP	CROONQUIST_NRAS_VS_STROMAL_STIMULATION_UP		37	-0.395135	-1.18278	0.204545	0.57471	1	2627	tags=24%, list=11%, signal=27%
KEGG_EPITHELIAL_CELL_SIGNALING_IN_HELICOBACTER_PYLORI_INFECTION	KEGG_EPITHELIAL_CELL_SIGNALING_IN_HELICOBACTER_PYLORI_INFECTION		67	-0.353984	-1.18267	0.174516	0.573808	1	1614	tags=15%, list=7%, signal=16%
KEGG_ANTIGEN_PROCESSING_AND_PRESENTATION	KEGG_ANTIGEN_PROCESSING_AND_PRESENTATION		49	-0.373988	-1.18262	0.195746	0.572688	1	3348	tags=18%, list=14%, signal=21%
ZHU_CMV_8_HR_UP	ZHU_CMV_8_HR_UP		43	-0.384137	-1.182	0.198743	0.573444	1	1983	tags=19%, list=8%, signal=20%
WIKMAN_ASBESTOS_LUNG_CANCER_DN	WIKMAN_ASBESTOS_LUNG_CANCER_DN		26	-0.430163	-1.18151	0.222471	0.573782	1	2524	tags=23%, list=11%, signal=26%
FINETTI_BREAST_CANCERS_KINOME_BLUE	FINETTI_BREAST_CANCERS_KINOME_BLUE		21	-0.449265	-1.18072	0.232663	0.5751	1	3922	tags=33%, list=17%, signal=40%
KEGG_HEDGEHOG_SIGNALING_PATHWAY	KEGG_HEDGEHOG_SIGNALING_PATHWAY		54	-0.367172	-1.18033	0.192336	0.575092	1	3185	tags=22%, list=14%, signal=26%
BILD_HRAS_ONCOGENIC_SIGNATURE	BILD_HRAS_ONCOGENIC_SIGNATURE		231	-0.297185	-1.18025	0.0978962	0.574108	1	2191	tags=17%, list=9%, signal=19%
MADAN_DPPA4_TARGETS	MADAN_DPPA4_TARGETS		39	-0.391397	-1.18008	0.199964	0.573381	1	2196	tags=21%, list=9%, signal=23%
MCDOWELL_ACUTE_LUNG_INJURY_DN	MCDOWELL_ACUTE_LUNG_INJURY_DN		39	-0.390049	-1.17911	0.204771	0.575277	1	4902	tags=44%, list=21%, signal=55%
REACTOME_PHOSPHOLIPID_METABOLISM	REACTOME_PHOSPHOLIPID_METABOLISM		189	-0.304657	-1.17902	0.112691	0.574319	1	2593	tags=18%, list=11%, signal=20%
RIGGI_EWING_SARCOMA_PROGENITOR_DN	RIGGI_EWING_SARCOMA_PROGENITOR_DN		164	-0.309261	-1.17799	0.122728	0.576438	1	4326	tags=27%, list=18%, signal=33%
ST_MYOCYTE_AD_PATHWAY	ST_MYOCYTE_AD_PATHWAY		27	-0.420579	-1.1771	0.224501	0.578101	1	6961	tags=52%, list=30%, signal=74%
MIKKELSEN_MEF_ICP_WITH_H3K27ME3	MIKKELSEN_MEF_ICP_WITH_H3K27ME3		182	-0.305593	-1.17665	0.115766	0.578295	1	4551	tags=27%, list=19%, signal=33%
DURCHDEWALD_SKIN_CARCINOGENESIS_DN	DURCHDEWALD_SKIN_CARCINOGENESIS_DN		246	-0.295645	-1.17644	0.0941096	0.577754	1	4286	tags=30%, list=18%, signal=36%
ZHAN_MULTIPLE_MYELOMA_HP_UP	ZHAN_MULTIPLE_MYELOMA_HP_UP		42	-0.382502	-1.17522	0.202861	0.580497	1	1278	tags=14%, list=5%, signal=15%
JECHLINGER_EPITHELIAL_TO_MESENCHYMAL_TRANSITION_UP	JECHLINGER_EPITHELIAL_TO_MESENCHYMAL_TRANSITION_UP		69	-0.350939	-1.17516	0.181263	0.579432	1	1314	tags=13%, list=6%, signal=14%
VILIMAS_NOTCH1_TARGETS_UP	VILIMAS_NOTCH1_TARGETS_UP		50	-0.371774	-1.17466	0.195201	0.579825	1	2776	tags=34%, list=12%, signal=38%
BIOCARTA_MAPK_PATHWAY	BIOCARTA_MAPK_PATHWAY		85	-0.337937	-1.17379	0.172644	0.581419	1	4595	tags=31%, list=20%, signal=38%
REACTOME_AMINO_ACID_TRANSPORT_ACROSS_THE_PLASMA_MEMBRANE	REACTOME_AMINO_ACID_TRANSPORT_ACROSS_THE_PLASMA_MEMBRANE		30	-0.412313	-1.17327	0.220718	0.581878	1	3521	tags=23%, list=15%, signal=27%
PID_P53_DOWNSTREAM_PATHWAY	PID_P53_DOWNSTREAM_PATHWAY		122	-0.320257	-1.17308	0.143539	0.581239	1	3954	tags=25%, list=17%, signal=29%
KEGG_CALCIUM_SIGNALING_PATHWAY	KEGG_CALCIUM_SIGNALING_PATHWAY		170	-0.306172	-1.17233	0.126222	0.582434	1	4437	tags=27%, list=19%, signal=33%
NIKOLSKY_BREAST_CANCER_7Q21_Q22_AMPLICON	NIKOLSKY_BREAST_CANCER_7Q21_Q22_AMPLICON		59	-0.358933	-1.17182	0.189317	0.582831	1	5028	tags=34%, list=21%, signal=43%
RADAEVA_RESPONSE_TO_IFNA1_UP	RADAEVA_RESPONSE_TO_IFNA1_UP		45	-0.378344	-1.17131	0.202869	0.583271	1	2399	tags=22%, list=10%, signal=25%
IVANOVSKA_MIR106B_TARGETS	IVANOVSKA_MIR106B_TARGETS		82	-0.340127	-1.17105	0.17237	0.582905	1	3487	tags=33%, list=15%, signal=39%
MANALO_HYPOXIA_UP	MANALO_HYPOXIA_UP		194	-0.301928	-1.16966	0.125255	0.586212	1	4283	tags=31%, list=18%, signal=38%
TRAYNOR_RETT_SYNDROM_UP	TRAYNOR_RETT_SYNDROM_UP		38	-0.39126	-1.1696	0.208379	0.585156	1	1504	tags=21%, list=6%, signal=22%
KAMIKUBO_MYELOID_CEBPA_NETWORK	KAMIKUBO_MYELOID_CEBPA_NETWORK		27	-0.419597	-1.16896	0.232644	0.586005	1	2740	tags=26%, list=12%, signal=29%
KEGG_GLYCOSAMINOGLYCAN_BIOSYNTHESIS_CHONDROITIN_SULFATE	KEGG_GLYCOSAMINOGLYCAN_BIOSYNTHESIS_CHONDROITIN_SULFATE		22	-0.441754	-1.16858	0.240968	0.586037	1	3434	tags=45%, list=15%, signal=53%
STEGER_ADIPOGENESIS_UP	STEGER_ADIPOGENESIS_UP		20	-0.451748	-1.16854	0.247672	0.584958	1	4034	tags=30%, list=17%, signal=36%
REACTOME_PEPTIDE_LIGAND_BINDING_RECEPTORS	REACTOME_PEPTIDE_LIGAND_BINDING_RECEPTORS		167	-0.30622	-1.16714	0.133287	0.588351	1	1639	tags=12%, list=7%, signal=13%
RICKMAN_HEAD_AND_NECK_CANCER_D	RICKMAN_HEAD_AND_NECK_CANCER_D		25	-0.424644	-1.16675	0.238077	0.588419	1	3141	tags=24%, list=13%, signal=28%
SESTO_RESPONSE_TO_UV_C5	SESTO_RESPONSE_TO_UV_C5		45	-0.375581	-1.16616	0.211224	0.58912	1	2306	tags=20%, list=10%, signal=22%
VERNOCHET_ADIPOGENESIS	VERNOCHET_ADIPOGENESIS		18	-0.46056	-1.16593	0.252618	0.588643	1	352	tags=11%, list=2%, signal=11%
SASAI_RESISTANCE_TO_NEOPLASTIC_TRANSFROMATION	SASAI_RESISTANCE_TO_NEOPLASTIC_TRANSFROMATION		50	-0.369688	-1.16589	0.202861	0.587549	1	1184	tags=16%, list=5%, signal=17%
NIKOLSKY_BREAST_CANCER_17Q21_Q25_AMPLICON	NIKOLSKY_BREAST_CANCER_17Q21_Q25_AMPLICON		288	-0.288217	-1.16574	0.0965517	0.586821	1	3892	tags=25%, list=17%, signal=29%
LIAO_HAVE_SOX4_BINDING_SITES	LIAO_HAVE_SOX4_BINDING_SITES		39	-0.38581	-1.16567	0.221237	0.585834	1	3212	tags=28%, list=14%, signal=33%
BURTON_ADIPOGENESIS_12	BURTON_ADIPOGENESIS_12		29	-0.413617	-1.16538	0.243273	0.5856	1	6892	tags=55%, list=29%, signal=78%
FIGUEROA_AML_METHYLATION_CLUSTER_1_UP	FIGUEROA_AML_METHYLATION_CLUSTER_1_UP		99	-0.327564	-1.16498	0.173687	0.585699	1	2296	tags=20%, list=10%, signal=22%
ELVIDGE_HYPOXIA_UP	ELVIDGE_HYPOXIA_UP		156	-0.308501	-1.16419	0.144147	0.587034	1	3066	tags=23%, list=13%, signal=26%
BOQUEST_STEM_CELL_CULTURED_VS_FRESH_UP	BOQUEST_STEM_CELL_CULTURED_VS_FRESH_UP		391	-0.279865	-1.16383	0.075931	0.587019	1	3059	tags=21%, list=13%, signal=24%
KEGG_ACUTE_MYELOID_LEUKEMIA	KEGG_ACUTE_MYELOID_LEUKEMIA		55	-0.361756	-1.16344	0.204026	0.587087	1	2391	tags=24%, list=10%, signal=26%
DELASERNA_MYOD_TARGETS_UP	DELASERNA_MYOD_TARGETS_UP		85	-0.335855	-1.16316	0.182372	0.586799	1	5562	tags=41%, list=24%, signal=54%
DELACROIX_RAR_TARGETS_UP	DELACROIX_RAR_TARGETS_UP		45	-0.376878	-1.16211	0.220238	0.589084	1	4339	tags=33%, list=19%, signal=41%
KIM_MYCN_AMPLIFICATION_TARGETS_UP	KIM_MYCN_AMPLIFICATION_TARGETS_UP		85	-0.334049	-1.16183	0.181707	0.588787	1	4013	tags=27%, list=17%, signal=33%
SUZUKI_RESPONSE_TO_TSA_AND_DECITABINE_1A	SUZUKI_RESPONSE_TO_TSA_AND_DECITABINE_1A		21	-0.442463	-1.16162	0.245607	0.58827	1	2574	tags=29%, list=11%, signal=32%
CHARAFE_BREAST_CANCER_BASAL_VS_MESENCHYMAL_DN	CHARAFE_BREAST_CANCER_BASAL_VS_MESENCHYMAL_DN		48	-0.370199	-1.16158	0.216859	0.587238	1	3301	tags=25%, list=14%, signal=29%
NABA_SECRETED_FACTORS	NABA_SECRETED_FACTORS		292	-0.285744	-1.15935	0.104784	0.593317	1	5115	tags=25%, list=22%, signal=32%
SAFFORD_T_LYMPHOCYTE_ANERGY	SAFFORD_T_LYMPHOCYTE_ANERGY		84	-0.333511	-1.15835	0.188497	0.595396	1	3762	tags=30%, list=16%, signal=35%
ONO_FOXP3_TARGETS_DN	ONO_FOXP3_TARGETS_DN		39	-0.386416	-1.15813	0.220654	0.594931	1	4233	tags=33%, list=18%, signal=41%
REACTOME_HEPARAN_SULFATE_HEPARIN_HS_GAG_METABOLISM	REACTOME_HEPARAN_SULFATE_HEPARIN_HS_GAG_METABOLISM		51	-0.365025	-1.15704	0.214194	0.597312	1	2428	tags=22%, list=10%, signal=24%
ACEVEDO_LIVER_CANCER_WITH_H3K27ME3_UP	ACEVEDO_LIVER_CANCER_WITH_H3K27ME3_UP		238	-0.291695	-1.15667	0.124273	0.597337	1	2181	tags=14%, list=9%, signal=15%
PID_TRAIL_PATHWAY	PID_TRAIL_PATHWAY		24	-0.426156	-1.1565	0.252181	0.596695	1	6134	tags=42%, list=26%, signal=56%
KARAKAS_TGFB1_SIGNALING	KARAKAS_TGFB1_SIGNALING		16	-0.468167	-1.15617	0.270802	0.59659	1	2329	tags=25%, list=10%, signal=28%
PID_CMYB_PATHWAY	PID_CMYB_PATHWAY		79	-0.337946	-1.15555	0.194101	0.597469	1	2560	tags=27%, list=11%, signal=30%
BROWNE_HCMV_INFECTION_18HR_DN	BROWNE_HCMV_INFECTION_18HR_DN		161	-0.303446	-1.15533	0.152429	0.597015	1	3338	tags=26%, list=14%, signal=30%
CONRAD_STEM_CELL	CONRAD_STEM_CELL		37	-0.385798	-1.15519	0.232072	0.5963	1	3883	tags=30%, list=17%, signal=36%
IWANAGA_CARCINOGENESIS_BY_KRAS_PTEN_DN	IWANAGA_CARCINOGENESIS_BY_KRAS_PTEN_DN		318	-0.282683	-1.15518	0.103993	0.595147	1	4059	tags=25%, list=17%, signal=29%
ACEVEDO_FGFR1_TARGETS_IN_PROSTATE_CANCER_MODEL_DN	ACEVEDO_FGFR1_TARGETS_IN_PROSTATE_CANCER_MODEL_DN		287	-0.285696	-1.15499	0.111204	0.594621	1	3207	tags=22%, list=14%, signal=25%
LAIHO_COLORECTAL_CANCER_SERRATED_DN	LAIHO_COLORECTAL_CANCER_SERRATED_DN		72	-0.341123	-1.15491	0.197879	0.593701	1	2663	tags=22%, list=11%, signal=25%
KAYO_AGING_MUSCLE_UP	KAYO_AGING_MUSCLE_UP		218	-0.294029	-1.15476	0.131994	0.593036	1	3261	tags=17%, list=14%, signal=20%
STREICHER_LSM1_TARGETS_UP	STREICHER_LSM1_TARGETS_UP		43	-0.375981	-1.1539	0.234617	0.594666	1	4268	tags=33%, list=18%, signal=40%
TIEN_INTESTINE_PROBIOTICS_2HR_DN	TIEN_INTESTINE_PROBIOTICS_2HR_DN		82	-0.334437	-1.15361	0.196668	0.594462	1	5562	tags=33%, list=24%, signal=43%
GAUSSMANN_MLL_AF4_FUSION_TARGETS_F_UP	GAUSSMANN_MLL_AF4_FUSION_TARGETS_F_UP		171	-0.300622	-1.15357	0.15061	0.593456	1	4849	tags=33%, list=21%, signal=41%
RICKMAN_TUMOR_DIFFERENTIATED_WELL_VS_POORLY_DN	RICKMAN_TUMOR_DIFFERENTIATED_WELL_VS_POORLY_DN		339	-0.280339	-1.15294	0.102028	0.594325	1	2001	tags=14%, list=9%, signal=15%
LEE_DIFFERENTIATING_T_LYMPHOCYTE	LEE_DIFFERENTIATING_T_LYMPHOCYTE		164	-0.302629	-1.15246	0.153434	0.594742	1	4321	tags=32%, list=18%, signal=39%
CROONQUIST_NRAS_SIGNALING_UP	CROONQUIST_NRAS_SIGNALING_UP		36	-0.389829	-1.15151	0.240125	0.596717	1	1202	tags=22%, list=5%, signal=23%
NABA_ECM_GLYCOPROTEINS	NABA_ECM_GLYCOPROTEINS		182	-0.298068	-1.15114	0.143794	0.596759	1	2524	tags=15%, list=11%, signal=16%
MIKKELSEN_NPC_HCP_WITH_H3K4ME3_AND_H3K27ME3	MIKKELSEN_NPC_HCP_WITH_H3K4ME3_AND_H3K27ME3		203	-0.294779	-1.15086	0.139672	0.596518	1	3848	tags=22%, list=16%, signal=26%
MIDORIKAWA_AMPLIFIED_IN_LIVER_CANCER	MIDORIKAWA_AMPLIFIED_IN_LIVER_CANCER		50	-0.364079	-1.15035	0.229568	0.597031	1	2103	tags=18%, list=9%, signal=20%
DELYS_THYROID_CANCER_DN	DELYS_THYROID_CANCER_DN		207	-0.293944	-1.14911	0.142616	0.599904	1	2765	tags=21%, list=12%, signal=23%
ODONNELL_TARGETS_OF_MYC_AND_TFRC_UP	ODONNELL_TARGETS_OF_MYC_AND_TFRC_UP		65	-0.345436	-1.14851	0.21263	0.600737	1	2071	tags=23%, list=9%, signal=25%
NIELSEN_LEIOMYOSARCOMA_UP	NIELSEN_LEIOMYOSARCOMA_UP		16	-0.465473	-1.14746	0.273003	0.603055	1	711	tags=19%, list=3%, signal=19%
BEGUM_TARGETS_OF_PAX3_FOXO1_FUSION_UP	BEGUM_TARGETS_OF_PAX3_FOXO1_FUSION_UP		56	-0.35596	-1.14681	0.229778	0.60406	1	4954	tags=38%, list=21%, signal=47%
PLASARI_TGFB1_TARGETS_10HR_UP	PLASARI_TGFB1_TARGETS_10HR_UP		191	-0.295399	-1.14659	0.148973	0.603615	1	4060	tags=27%, list=17%, signal=33%
PID_IL27_PATHWAY	PID_IL27_PATHWAY		26	-0.41469	-1.14642	0.258579	0.602975	1	2391	tags=31%, list=10%, signal=34%
CAIRO_LIVER_DEVELOPMENT_DN	CAIRO_LIVER_DEVELOPMENT_DN		208	-0.292573	-1.14639	0.145461	0.601942	1	1582	tags=13%, list=7%, signal=14%
MASSARWEH_RESPONSE_TO_ESTRADIOL	MASSARWEH_RESPONSE_TO_ESTRADIOL		59	-0.352034	-1.14634	0.218393	0.600964	1	3625	tags=36%, list=15%, signal=42%
VERRECCHIA_RESPONSE_TO_TGFB1_C2	VERRECCHIA_RESPONSE_TO_TGFB1_C2		25	-0.417203	-1.14623	0.261453	0.600165	1	2387	tags=28%, list=10%, signal=31%
BROWNE_HCMV_INFECTION_1HR_DN	BROWNE_HCMV_INFECTION_1HR_DN		207	-0.293516	-1.14593	0.148783	0.600002	1	4312	tags=27%, list=18%, signal=33%
PID_SYNDECAN_1_PATHWAY	PID_SYNDECAN_1_PATHWAY		45	-0.368986	-1.1459	0.234648	0.598964	1	2526	tags=22%, list=11%, signal=25%
DAZARD_RESPONSE_TO_UV_NHEK_DN	DAZARD_RESPONSE_TO_UV_NHEK_DN		287	-0.283682	-1.14586	0.122233	0.597992	1	5756	tags=36%, list=25%, signal=47%
KEGG_NOTCH_SIGNALING_PATHWAY	KEGG_NOTCH_SIGNALING_PATHWAY		47	-0.365838	-1.145	0.23316	0.599632	1	5030	tags=40%, list=21%, signal=51%
PID_AMB2_NEUTROPHILS_PATHWAY	PID_AMB2_NEUTROPHILS_PATHWAY		40	-0.378455	-1.14468	0.233856	0.599563	1	1542	tags=23%, list=7%, signal=24%
ELVIDGE_HYPOXIA_BY_DMOG_UP	ELVIDGE_HYPOXIA_BY_DMOG_UP		120	-0.313324	-1.14454	0.185153	0.598892	1	3066	tags=23%, list=13%, signal=27%
REACTOME_CLASS_A1_RHODOPSIN_LIKE_RECEPTORS	REACTOME_CLASS_A1_RHODOPSIN_LIKE_RECEPTORS		269	-0.284395	-1.14387	0.128205	0.599933	1	3951	tags=20%, list=17%, signal=24%
KEGG_ARRHYTHMOGENIC_RIGHT_VENTRICULAR_CARDIOMYOPATHY_ARVC	KEGG_ARRHYTHMOGENIC_RIGHT_VENTRICULAR_CARDIOMYOPATHY_ARVC		74	-0.33729	-1.14334	0.213743	0.600551	1	2253	tags=19%, list=10%, signal=21%
MACLACHLAN_BRCA1_TARGETS_UP	MACLACHLAN_BRCA1_TARGETS_UP		21	-0.433834	-1.14279	0.268732	0.601229	1	2557	tags=29%, list=11%, signal=32%
RIGGI_EWING_SARCOMA_PROGENITOR_UP	RIGGI_EWING_SARCOMA_PROGENITOR_UP		387	-0.2751	-1.1427	0.107974	0.600407	1	3598	tags=23%, list=15%, signal=27%
KEGG_GAP_JUNCTION	KEGG_GAP_JUNCTION		81	-0.332314	-1.14184	0.215351	0.602092	1	2994	tags=21%, list=13%, signal=24%
INGRAM_SHH_TARGETS_UP	INGRAM_SHH_TARGETS_UP		121	-0.312284	-1.14139	0.191347	0.602442	1	3713	tags=22%, list=16%, signal=26%
TSAI_RESPONSE_TO_IONIZING_RADIATION	TSAI_RESPONSE_TO_IONIZING_RADIATION		140	-0.305051	-1.14086	0.175784	0.60307	1	3881	tags=29%, list=17%, signal=34%
KEGG_BASAL_CELL_CARCINOMA	KEGG_BASAL_CELL_CARCINOMA		54	-0.35546	-1.13956	0.236727	0.606197	1	3225	tags=26%, list=14%, signal=30%
ROZANOV_MMP14_TARGETS_SUBSET	ROZANOV_MMP14_TARGETS_SUBSET		32	-0.39567	-1.13889	0.256358	0.607271	1	5162	tags=53%, list=22%, signal=68%
MASRI_RESISTANCE_TO_TAMOXIFEN_AND_AROMATASE_INHIBITORS_UP	MASRI_RESISTANCE_TO_TAMOXIFEN_AND_AROMATASE_INHIBITORS_UP		19	-0.445134	-1.13877	0.284095	0.606568	1	3199	tags=47%, list=14%, signal=55%
ZHAN_MULTIPLE_MYELOMA_MF_DN	ZHAN_MULTIPLE_MYELOMA_MF_DN		36	-0.384976	-1.1385	0.249815	0.606351	1	3085	tags=31%, list=13%, signal=35%
CAIRO_HEPATOBLASTOMA_CLASSES_DN	CAIRO_HEPATOBLASTOMA_CLASSES_DN		192	-0.293946	-1.13826	0.164372	0.606018	1	2071	tags=17%, list=9%, signal=18%
REACTOME_G_ALPHA_Q_SIGNALLING_EVENTS	REACTOME_G_ALPHA_Q_SIGNALLING_EVENTS		170	-0.297362	-1.13808	0.170005	0.605524	1	4781	tags=24%, list=20%, signal=29%
HOOI_ST7_TARGETS_DN	HOOI_ST7_TARGETS_DN		99	-0.319412	-1.13797	0.205282	0.604747	1	2943	tags=21%, list=13%, signal=24%
REACTOME_AXON_GUIDANCE	REACTOME_AXON_GUIDANCE		232	-0.286281	-1.13763	0.141284	0.604741	1	2599	tags=19%, list=11%, signal=22%
PID_IL3_PATHWAY	PID_IL3_PATHWAY		26	-0.415919	-1.13713	0.275571	0.60526	1	837	tags=15%, list=4%, signal=16%
REACTOME_RESPONSE_TO_ELEVATED_PLATELET_CYTOSOLIC_CA2_	REACTOME_RESPONSE_TO_ELEVATED_PLATELET_CYTOSOLIC_CA2_		76	-0.332028	-1.13706	0.218248	0.604393	1	2326	tags=21%, list=10%, signal=23%
TANAKA_METHYLATED_IN_ESOPHAGEAL_CARCINOMA	TANAKA_METHYLATED_IN_ESOPHAGEAL_CARCINOMA		93	-0.322546	-1.13654	0.2144	0.60497	1	4534	tags=27%, list=19%, signal=33%
REACTOME_IL_3_5_AND_GM_CSF_SIGNALING	REACTOME_IL_3_5_AND_GM_CSF_SIGNALING		42	-0.372194	-1.13582	0.252333	0.606203	1	5539	tags=38%, list=24%, signal=50%
REACTOME_HS_GAG_BIOSYNTHESIS	REACTOME_HS_GAG_BIOSYNTHESIS		30	-0.397817	-1.13526	0.266691	0.606911	1	2006	tags=20%, list=9%, signal=22%
MULLIGHAN_MLL_SIGNATURE_1_DN	MULLIGHAN_MLL_SIGNATURE_1_DN		217	-0.288744	-1.13415	0.160088	0.609413	1	1803	tags=14%, list=8%, signal=15%
CHANG_CORE_SERUM_RESPONSE_DN	CHANG_CORE_SERUM_RESPONSE_DN		174	-0.295619	-1.13378	0.169468	0.609505	1	3568	tags=27%, list=15%, signal=32%
REACTOME_GPCR_LIGAND_BINDING	REACTOME_GPCR_LIGAND_BINDING		368	-0.274725	-1.13319	0.124593	0.610325	1	3805	tags=18%, list=16%, signal=22%
MCCABE_HOXC6_TARGETS_CANCER_UP	MCCABE_HOXC6_TARGETS_CANCER_UP		29	-0.399119	-1.13146	0.271496	0.614862	1	5254	tags=48%, list=22%, signal=62%
KIM_WT1_TARGETS_UP	KIM_WT1_TARGETS_UP		204	-0.29	-1.13117	0.165422	0.61468	1	2012	tags=18%, list=9%, signal=20%
NABA_BASEMENT_MEMBRANES	NABA_BASEMENT_MEMBRANES		39	-0.375446	-1.13103	0.258871	0.61406	1	2526	tags=18%, list=11%, signal=20%
REACTOME_GROWTH_HORMONE_RECEPTOR_SIGNALING	REACTOME_GROWTH_HORMONE_RECEPTOR_SIGNALING		21	-0.430686	-1.13099	0.280234	0.613084	1	2391	tags=19%, list=10%, signal=21%
RODRIGUES_THYROID_CARCINOMA_ANAPLASTIC_DN	RODRIGUES_THYROID_CARCINOMA_ANAPLASTIC_DN		452	-0.268431	-1.13052	0.11191	0.613547	1	4277	tags=28%, list=18%, signal=34%
VERHAAK_AML_WITH_NPM1_MUTATED_DN	VERHAAK_AML_WITH_NPM1_MUTATED_DN		229	-0.285071	-1.13024	0.165162	0.613352	1	2143	tags=19%, list=9%, signal=20%
TONKS_TARGETS_OF_RUNX1_RUNX1T1_FUSION_HSC_DN	TONKS_TARGETS_OF_RUNX1_RUNX1T1_FUSION_HSC_DN		167	-0.296569	-1.13007	0.186361	0.612812	1	2560	tags=23%, list=11%, signal=25%
CHIANG_LIVER_CANCER_SUBCLASS_CTNNB1_DN	CHIANG_LIVER_CANCER_SUBCLASS_CTNNB1_DN		155	-0.298731	-1.1297	0.180679	0.612927	1	3173	tags=21%, list=14%, signal=24%
PEDERSEN_METASTASIS_BY_ERBB2_ISOFORM_7	PEDERSEN_METASTASIS_BY_ERBB2_ISOFORM_7		341	-0.274363	-1.12961	0.130663	0.612122	1	4298	tags=26%, list=18%, signal=31%
VANASSE_BCL2_TARGETS_DN	VANASSE_BCL2_TARGETS_DN		68	-0.336342	-1.12804	0.237374	0.616182	1	2567	tags=22%, list=11%, signal=25%
ALCALAY_AML_BY_NPM1_LOCALIZATION_UP	ALCALAY_AML_BY_NPM1_LOCALIZATION_UP		130	-0.3057	-1.12757	0.205124	0.616609	1	2065	tags=18%, list=9%, signal=19%
SHIPP_DLBCL_CURED_VS_FATAL_UP	SHIPP_DLBCL_CURED_VS_FATAL_UP		32	-0.391635	-1.12756	0.278713	0.615571	1	3616	tags=28%, list=15%, signal=33%
GRESHOCK_CANCER_COPY_NUMBER_UP	GRESHOCK_CANCER_COPY_NUMBER_UP		307	-0.276947	-1.12678	0.146927	0.617013	1	5669	tags=36%, list=24%, signal=47%
KEGG_CYTOSOLIC_DNA_SENSING_PATHWAY	KEGG_CYTOSOLIC_DNA_SENSING_PATHWAY		49	-0.35731	-1.12634	0.252381	0.617375	1	6046	tags=35%, list=26%, signal=47%
JAATINEN_HEMATOPOIETIC_STEM_CELL_UP	JAATINEN_HEMATOPOIETIC_STEM_CELL_UP		281	-0.279274	-1.12569	0.152275	0.618407	1	2661	tags=20%, list=11%, signal=23%
BOSCO_TH1_CYTOTOXIC_MODULE	BOSCO_TH1_CYTOTOXIC_MODULE		101	-0.315679	-1.12496	0.220102	0.619689	1	3379	tags=28%, list=14%, signal=32%
REACTOME_RIG_I_MDA5_MEDIATED_INDUCTION_OF_IFN_ALPHA_BETA_PATHWAYS	REACTOME_RIG_I_MDA5_MEDIATED_INDUCTION_OF_IFN_ALPHA_BETA_PATHWAYS		63	-0.338875	-1.12407	0.24263	0.621516	1	3071	tags=21%, list=13%, signal=24%
SENESE_HDAC2_TARGETS_UP	SENESE_HDAC2_TARGETS_UP		103	-0.314769	-1.12402	0.219308	0.620585	1	2965	tags=17%, list=13%, signal=20%
SILIGAN_TARGETS_OF_EWS_FLI1_FUSION_DN	SILIGAN_TARGETS_OF_EWS_FLI1_FUSION_DN		16	-0.458006	-1.1236	0.305828	0.620913	1	363	tags=13%, list=2%, signal=13%
FUJII_YBX1_TARGETS_UP	FUJII_YBX1_TARGETS_UP		35	-0.380463	-1.12345	0.272995	0.620336	1	711	tags=17%, list=3%, signal=18%
MURATA_VIRULENCE_OF_H_PILORI	MURATA_VIRULENCE_OF_H_PILORI		21	-0.42693	-1.12331	0.298764	0.619723	1	2943	tags=38%, list=13%, signal=44%
LEE_LIVER_CANCER_ACOX1_DN	LEE_LIVER_CANCER_ACOX1_DN		59	-0.344452	-1.12323	0.250046	0.618903	1	1963	tags=14%, list=8%, signal=15%
MORI_SMALL_PRE_BII_LYMPHOCYTE_UP	MORI_SMALL_PRE_BII_LYMPHOCYTE_UP		81	-0.326191	-1.12309	0.231987	0.618286	1	3594	tags=27%, list=15%, signal=32%
GAURNIER_PSMD4_TARGETS	GAURNIER_PSMD4_TARGETS		48	-0.356327	-1.12138	0.255903	0.622841	1	3034	tags=27%, list=13%, signal=31%
JIANG_TIP30_TARGETS_DN	JIANG_TIP30_TARGETS_DN		21	-0.425902	-1.12116	0.294776	0.622479	1	4877	tags=43%, list=21%, signal=54%
NIKOLSKY_BREAST_CANCER_8Q23_Q24_AMPLICON	NIKOLSKY_BREAST_CANCER_8Q23_Q24_AMPLICON		132	-0.302521	-1.12095	0.209294	0.622108	1	4151	tags=30%, list=18%, signal=36%
MIKKELSEN_NPC_ICP_WITH_H3K4ME3	MIKKELSEN_NPC_ICP_WITH_H3K4ME3		386	-0.269678	-1.11939	0.135848	0.626141	1	5650	tags=37%, list=24%, signal=47%
HORIUCHI_WTAP_TARGETS_UP	HORIUCHI_WTAP_TARGETS_UP		263	-0.278405	-1.11905	0.169347	0.626201	1	2979	tags=24%, list=13%, signal=27%
ANASTASSIOU_MULTICANCER_INVASIVENESS_SIGNATURE	ANASTASSIOU_MULTICANCER_INVASIVENESS_SIGNATURE		62	-0.340368	-1.11901	0.256909	0.625236	1	2835	tags=24%, list=12%, signal=27%
BASSO_CD40_SIGNALING_DN	BASSO_CD40_SIGNALING_DN		61	-0.340237	-1.1187	0.257803	0.625205	1	2208	tags=20%, list=9%, signal=22%
PANGAS_TUMOR_SUPPRESSION_BY_SMAD1_AND_SMAD5_UP	PANGAS_TUMOR_SUPPRESSION_BY_SMAD1_AND_SMAD5_UP		124	-0.305165	-1.11856	0.217491	0.624582	1	4286	tags=32%, list=18%, signal=39%
BROWNE_HCMV_INFECTION_8HR_UP	BROWNE_HCMV_INFECTION_8HR_UP		90	-0.319198	-1.11826	0.236276	0.624487	1	3704	tags=27%, list=16%, signal=32%
RATTENBACHER_BOUND_BY_CELF1	RATTENBACHER_BOUND_BY_CELF1		361	-0.269493	-1.11683	0.144423	0.628127	1	4283	tags=27%, list=18%, signal=32%
REACTOME_JNK_C_JUN_KINASES_PHOSPHORYLATION_AND_ACTIVATION_MEDIATED_BY_ACTIVATED_HUMAN_TAK1	REACTOME_JNK_C_JUN_KINASES_PHOSPHORYLATION_AND_ACTIVATION_MEDIATED_BY_ACTIVATED_HUMAN_TAK1		16	-0.453743	-1.11635	0.312512	0.628651	1	4493	tags=31%, list=19%, signal=39%
REACTOME_SYNTHESIS_OF_PIPS_AT_THE_GOLGI_MEMBRANE	REACTOME_SYNTHESIS_OF_PIPS_AT_THE_GOLGI_MEMBRANE		16	-0.455026	-1.11634	0.309163	0.627619	1	6886	tags=50%, list=29%, signal=71%
SABATES_COLORECTAL_ADENOMA_SIZE_UP	SABATES_COLORECTAL_ADENOMA_SIZE_UP		17	-0.446848	-1.11577	0.308885	0.628419	1	1839	tags=24%, list=8%, signal=26%
ONDER_CDH1_TARGETS_2_UP	ONDER_CDH1_TARGETS_2_UP		238	-0.281749	-1.11474	0.179983	0.630741	1	3384	tags=22%, list=14%, signal=25%
BIOCARTA_LAIR_PATHWAY	BIOCARTA_LAIR_PATHWAY		16	-0.45379	-1.11471	0.311174	0.62976	1	764	tags=19%, list=3%, signal=19%
TURASHVILI_BREAST_DUCTAL_CARCINOMA_VS_DUCTAL_NORMAL_DN	TURASHVILI_BREAST_DUCTAL_CARCINOMA_VS_DUCTAL_NORMAL_DN		163	-0.292615	-1.11469	0.208391	0.628776	1	3858	tags=26%, list=16%, signal=31%
BOYAULT_LIVER_CANCER_SUBCLASS_G1_DN	BOYAULT_LIVER_CANCER_SUBCLASS_G1_DN		33	-0.38205	-1.11461	0.290024	0.627979	1	2616	tags=27%, list=11%, signal=31%
SENESE_HDAC1_AND_HDAC2_TARGETS_UP	SENESE_HDAC1_AND_HDAC2_TARGETS_UP		208	-0.284292	-1.114	0.189254	0.628925	1	4959	tags=29%, list=21%, signal=36%
PARK_APL_PATHOGENESIS_DN	PARK_APL_PATHOGENESIS_DN		42	-0.363609	-1.11374	0.275115	0.628729	1	1839	tags=24%, list=8%, signal=26%
SUZUKI_RESPONSE_TO_TSA	SUZUKI_RESPONSE_TO_TSA		17	-0.446249	-1.11351	0.315034	0.628444	1	3546	tags=35%, list=15%, signal=42%
SEITZ_NEOPLASTIC_TRANSFORMATION_BY_8P_DELETION_DN	SEITZ_NEOPLASTIC_TRANSFORMATION_BY_8P_DELETION_DN		29	-0.391079	-1.11351	0.29282	0.627401	1	4210	tags=41%, list=18%, signal=50%
ZWANG_CLASS_1_TRANSIENTLY_INDUCED_BY_EGF	ZWANG_CLASS_1_TRANSIENTLY_INDUCED_BY_EGF		454	-0.264334	-1.1132	0.141935	0.627382	1	4458	tags=28%, list=19%, signal=33%
ZHAN_MULTIPLE_MYELOMA_DN	ZHAN_MULTIPLE_MYELOMA_DN		36	-0.375863	-1.11256	0.289355	0.628443	1	2153	tags=22%, list=9%, signal=24%
KEGG_GLIOMA	KEGG_GLIOMA		61	-0.338696	-1.11175	0.266273	0.630035	1	2858	tags=26%, list=12%, signal=30%
RUIZ_TNC_TARGETS_UP	RUIZ_TNC_TARGETS_UP		139	-0.297683	-1.11128	0.221379	0.630533	1	1846	tags=16%, list=8%, signal=17%
REACTOME_SIGNALING_BY_PDGF	REACTOME_SIGNALING_BY_PDGF		116	-0.305351	-1.11123	0.230146	0.629656	1	2739	tags=22%, list=12%, signal=25%
YANG_BREAST_CANCER_ESR1_BULK_DN	YANG_BREAST_CANCER_ESR1_BULK_DN		22	-0.417805	-1.11071	0.30243	0.630285	1	1748	tags=23%, list=7%, signal=25%
KEGG_REGULATION_OF_ACTIN_CYTOSKELETON	KEGG_REGULATION_OF_ACTIN_CYTOSKELETON		203	-0.284753	-1.11063	0.200442	0.629509	1	3033	tags=21%, list=13%, signal=24%
ST_GAQ_PATHWAY	ST_GAQ_PATHWAY		27	-0.39785	-1.10975	0.302933	0.631348	1	930	tags=22%, list=4%, signal=23%
ODONNELL_TFRC_TARGETS_UP	ODONNELL_TFRC_TARGETS_UP		337	-0.269784	-1.10932	0.173581	0.631696	1	3440	tags=23%, list=15%, signal=26%
FARMER_BREAST_CANCER_CLUSTER_3	FARMER_BREAST_CANCER_CLUSTER_3		16	-0.448995	-1.10921	0.320104	0.631039	1	2975	tags=31%, list=13%, signal=36%
SANA_TNF_SIGNALING_DN	SANA_TNF_SIGNALING_DN		83	-0.320128	-1.1082	0.253618	0.633321	1	2361	tags=20%, list=10%, signal=23%
CHIBA_RESPONSE_TO_TSA_UP	CHIBA_RESPONSE_TO_TSA_UP		48	-0.35137	-1.10776	0.282018	0.633724	1	2943	tags=25%, list=13%, signal=29%
PID_FGF_PATHWAY	PID_FGF_PATHWAY		54	-0.343019	-1.10746	0.273657	0.633659	1	5690	tags=37%, list=24%, signal=49%
HATADA_METHYLATED_IN_LUNG_CANCER_UP	HATADA_METHYLATED_IN_LUNG_CANCER_UP		345	-0.268789	-1.10744	0.166777	0.63271	1	3677	tags=20%, list=16%, signal=23%
WEST_ADRENOCORTICAL_TUMOR_MARKERS_DN	WEST_ADRENOCORTICAL_TUMOR_MARKERS_DN		19	-0.431968	-1.10729	0.31303	0.63216	1	3762	tags=32%, list=16%, signal=38%
CHARAFE_BREAST_CANCER_LUMINAL_VS_BASAL_DN	CHARAFE_BREAST_CANCER_LUMINAL_VS_BASAL_DN		405	-0.265353	-1.10624	0.161583	0.634567	1	2862	tags=19%, list=12%, signal=21%
GESERICK_TERT_TARGETS_DN	GESERICK_TERT_TARGETS_DN		21	-0.42239	-1.1059	0.318138	0.634632	1	2514	tags=33%, list=11%, signal=37%
POOLA_INVASIVE_BREAST_CANCER_DN	POOLA_INVASIVE_BREAST_CANCER_DN		123	-0.302654	-1.10583	0.237685	0.633869	1	3032	tags=22%, list=13%, signal=25%
REACTOME_POTASSIUM_CHANNELS	REACTOME_POTASSIUM_CHANNELS		97	-0.31253	-1.10565	0.2504	0.633439	1	3153	tags=25%, list=13%, signal=28%
GAUSSMANN_MLL_AF4_FUSION_TARGETS_E_UP	GAUSSMANN_MLL_AF4_FUSION_TARGETS_E_UP		89	-0.316412	-1.10555	0.257204	0.632737	1	4054	tags=31%, list=17%, signal=38%
MARIADASON_RESPONSE_TO_BUTYRATE_SULINDAC_6	MARIADASON_RESPONSE_TO_BUTYRATE_SULINDAC_6		47	-0.353612	-1.10535	0.282089	0.632343	1	3290	tags=34%, list=14%, signal=40%
BANDRES_RESPONSE_TO_CARMUSTIN_WITHOUT_MGMT_48HR_UP	BANDRES_RESPONSE_TO_CARMUSTIN_WITHOUT_MGMT_48HR_UP		18	-0.435722	-1.10396	0.321833	0.635847	1	1794	tags=22%, list=8%, signal=24%
BIOCARTA_CYTOKINE_PATHWAY	BIOCARTA_CYTOKINE_PATHWAY		21	-0.423176	-1.10314	0.32255	0.637475	1	4644	tags=29%, list=20%, signal=36%
HE_PTEN_TARGETS_UP	HE_PTEN_TARGETS_UP		15	-0.454572	-1.10289	0.322556	0.637298	1	3811	tags=40%, list=16%, signal=48%
REACTOME_TRANSPORT_OF_INORGANIC_CATIONS_ANIONS_AND_AMINO_ACIDS_OLIGOPEPTIDES	REACTOME_TRANSPORT_OF_INORGANIC_CATIONS_ANIONS_AND_AMINO_ACIDS_OLIGOPEPTIDES		92	-0.314368	-1.10288	0.26094	0.63632	1	3018	tags=21%, list=13%, signal=24%
BROWNE_HCMV_INFECTION_20HR_DN	BROWNE_HCMV_INFECTION_20HR_DN		90	-0.314375	-1.10243	0.260793	0.636745	1	2079	tags=20%, list=9%, signal=22%
DUTERTRE_ESTRADIOL_RESPONSE_24HR_DN	DUTERTRE_ESTRADIOL_RESPONSE_24HR_DN		464	-0.260856	-1.10237	0.155006	0.635954	1	4453	tags=28%, list=19%, signal=33%
PETROVA_PROX1_TARGETS_DN	PETROVA_PROX1_TARGETS_DN		59	-0.337717	-1.10235	0.274395	0.634984	1	2329	tags=20%, list=10%, signal=23%
SARTIPY_NORMAL_AT_INSULIN_RESISTANCE_DN	SARTIPY_NORMAL_AT_INSULIN_RESISTANCE_DN		18	-0.434608	-1.10121	0.322224	0.637702	1	1966	tags=22%, list=8%, signal=24%
ZHU_CMV_8_HR_DN	ZHU_CMV_8_HR_DN		47	-0.351247	-1.10054	0.286557	0.638894	1	3177	tags=32%, list=14%, signal=37%
ONO_AML1_TARGETS_UP	ONO_AML1_TARGETS_UP		23	-0.40967	-1.10034	0.313707	0.638515	1	1635	tags=30%, list=7%, signal=33%
PID_RHODOPSIN_PATHWAY	PID_RHODOPSIN_PATHWAY		23	-0.41068	-1.10021	0.314142	0.637945	1	4697	tags=39%, list=20%, signal=49%
DAVICIONI_MOLECULAR_ARMS_VS_ERMS_DN	DAVICIONI_MOLECULAR_ARMS_VS_ERMS_DN		173	-0.286876	-1.09949	0.22758	0.639272	1	3121	tags=21%, list=13%, signal=24%
PID_ERBB2_ERBB3_PATHWAY	PID_ERBB2_ERBB3_PATHWAY		43	-0.356382	-1.0994	0.294042	0.638562	1	3445	tags=21%, list=15%, signal=24%
PID_RAC1_REG_PATHWAY	PID_RAC1_REG_PATHWAY		38	-0.368772	-1.0993	0.310402	0.637881	1	4060	tags=32%, list=17%, signal=38%
KRASNOSELSKAYA_ILF3_TARGETS_UP	KRASNOSELSKAYA_ILF3_TARGETS_UP		29	-0.387109	-1.09883	0.30947	0.63842	1	2493	tags=31%, list=11%, signal=35%
KIM_MYC_AMPLIFICATION_TARGETS_DN	KIM_MYC_AMPLIFICATION_TARGETS_DN		81	-0.318653	-1.09864	0.269647	0.638032	1	1629	tags=17%, list=7%, signal=19%
LOPEZ_EPITHELIOID_MESOTHELIOMA	LOPEZ_EPITHELIOID_MESOTHELIOMA		17	-0.440754	-1.09851	0.330531	0.637484	1	4544	tags=35%, list=19%, signal=44%
NOJIMA_SFRP2_TARGETS_DN	NOJIMA_SFRP2_TARGETS_DN		24	-0.405825	-1.09797	0.31954	0.638206	1	3376	tags=38%, list=14%, signal=44%
ZHANG_TARGETS_OF_EWSR1_FLI1_FUSION	ZHANG_TARGETS_OF_EWSR1_FLI1_FUSION		81	-0.319426	-1.09762	0.276726	0.638359	1	2993	tags=26%, list=13%, signal=30%
YAO_TEMPORAL_RESPONSE_TO_PROGESTERONE_CLUSTER_0	YAO_TEMPORAL_RESPONSE_TO_PROGESTERONE_CLUSTER_0		70	-0.326491	-1.09739	0.279647	0.638114	1	4233	tags=34%, list=18%, signal=42%
ZHAN_MULTIPLE_MYELOMA_LB_UP	ZHAN_MULTIPLE_MYELOMA_LB_UP		38	-0.365618	-1.09732	0.301999	0.637329	1	5415	tags=39%, list=23%, signal=51%
MOHANKUMAR_TLX1_TARGETS_DN	MOHANKUMAR_TLX1_TARGETS_DN		158	-0.291025	-1.09717	0.243357	0.636823	1	3690	tags=26%, list=16%, signal=31%
REACTOME_BMAL1_CLOCK_NPAS2_ACTIVATES_CIRCADIAN_EXPRESSION	REACTOME_BMAL1_CLOCK_NPAS2_ACTIVATES_CIRCADIAN_EXPRESSION		35	-0.374497	-1.09692	0.310557	0.636657	1	2129	tags=23%, list=9%, signal=25%
WEBER_METHYLATED_IN_COLON_CANCER	WEBER_METHYLATED_IN_COLON_CANCER		15	-0.453347	-1.09671	0.337081	0.636346	1	4851	tags=40%, list=21%, signal=50%
KEGG_GNRH_SIGNALING_PATHWAY	KEGG_GNRH_SIGNALING_PATHWAY		95	-0.30999	-1.09619	0.271986	0.637058	1	4437	tags=24%, list=19%, signal=30%
BIOCARTA_INFLAM_PATHWAY	BIOCARTA_INFLAM_PATHWAY		27	-0.391262	-1.0959	0.321089	0.637008	1	4644	tags=30%, list=20%, signal=37%
NABA_ECM_REGULATORS	NABA_ECM_REGULATORS		209	-0.279977	-1.09515	0.225282	0.638423	1	3527	tags=18%, list=15%, signal=21%
KLEIN_TARGETS_OF_BCR_ABL1_FUSION	KLEIN_TARGETS_OF_BCR_ABL1_FUSION		43	-0.355858	-1.09513	0.30369	0.637523	1	3409	tags=33%, list=15%, signal=38%
SA_PTEN_PATHWAY	SA_PTEN_PATHWAY		17	-0.438564	-1.09465	0.334584	0.638075	1	2649	tags=24%, list=11%, signal=27%
RAO_BOUND_BY_SALL4_ISOFORM_A	RAO_BOUND_BY_SALL4_ISOFORM_A		150	-0.28963	-1.09347	0.241955	0.640916	1	4556	tags=29%, list=19%, signal=35%
LIAN_NEUTROPHIL_GRANULE_CONSTITUENTS	LIAN_NEUTROPHIL_GRANULE_CONSTITUENTS		24	-0.402634	-1.09343	0.323781	0.640065	1	145	tags=13%, list=1%, signal=13%
DEURIG_T_CELL_PROLYMPHOCYTIC_LEUKEMIA_DN	DEURIG_T_CELL_PROLYMPHOCYTIC_LEUKEMIA_DN		265	-0.272393	-1.09312	0.215599	0.640094	1	4298	tags=27%, list=18%, signal=32%
GARGALOVIC_RESPONSE_TO_OXIDIZED_PHOSPHOLIPIDS_GREY_DN	GARGALOVIC_RESPONSE_TO_OXIDIZED_PHOSPHOLIPIDS_GREY_DN		59	-0.332831	-1.09286	0.289775	0.639961	1	1780	tags=20%, list=8%, signal=22%
PID_SYNDECAN_3_PATHWAY	PID_SYNDECAN_3_PATHWAY		17	-0.43982	-1.09128	0.341418	0.64415	1	5009	tags=41%, list=21%, signal=52%
GAZDA_DIAMOND_BLACKFAN_ANEMIA_MYELOID_UP	GAZDA_DIAMOND_BLACKFAN_ANEMIA_MYELOID_UP		27	-0.390784	-1.09045	0.322012	0.645822	1	2549	tags=26%, list=11%, signal=29%
NAKAYAMA_SOFT_TISSUE_TUMORS_PCA1_UP	NAKAYAMA_SOFT_TISSUE_TUMORS_PCA1_UP		60	-0.33211	-1.09026	0.288359	0.645471	1	2329	tags=25%, list=10%, signal=28%
REACTOME_SIGNALING_BY_ROBO_RECEPTOR	REACTOME_SIGNALING_BY_ROBO_RECEPTOR		29	-0.384518	-1.09014	0.325543	0.644881	1	2416	tags=24%, list=10%, signal=27%
HUMMERICH_BENIGN_SKIN_TUMOR_DN	HUMMERICH_BENIGN_SKIN_TUMOR_DN		18	-0.427858	-1.08874	0.333396	0.648443	1	2752	tags=33%, list=12%, signal=38%
VERRECCHIA_DELAYED_RESPONSE_TO_TGFB1	VERRECCHIA_DELAYED_RESPONSE_TO_TGFB1		38	-0.362389	-1.08829	0.313019	0.648913	1	3352	tags=26%, list=14%, signal=31%
PID_BMP_PATHWAY	PID_BMP_PATHWAY		42	-0.35605	-1.08809	0.308592	0.648559	1	6143	tags=38%, list=26%, signal=52%
REACTOME_GPCR_DOWNSTREAM_SIGNALING	REACTOME_GPCR_DOWNSTREAM_SIGNALING		446	-0.258008	-1.08769	0.190922	0.648882	1	3812	tags=19%, list=16%, signal=23%
MARTINEZ_RESPONSE_TO_TRABECTEDIN	MARTINEZ_RESPONSE_TO_TRABECTEDIN		48	-0.344014	-1.08635	0.308137	0.652305	1	5591	tags=42%, list=24%, signal=55%
PID_UPA_UPAR_PATHWAY	PID_UPA_UPAR_PATHWAY		42	-0.354723	-1.08516	0.31721	0.655206	1	1542	tags=19%, list=7%, signal=20%
REACTOME_AMINO_ACID_AND_OLIGOPEPTIDE_SLC_TRANSPORTERS	REACTOME_AMINO_ACID_AND_OLIGOPEPTIDE_SLC_TRANSPORTERS		48	-0.346611	-1.08496	0.319444	0.654895	1	713	tags=10%, list=3%, signal=11%
RODRIGUES_NTN1_TARGETS_DN	RODRIGUES_NTN1_TARGETS_DN		143	-0.289993	-1.0844	0.263989	0.655721	1	2665	tags=17%, list=11%, signal=20%
PID_LYSOPHOSPHOLIPID_PATHWAY	PID_LYSOPHOSPHOLIPID_PATHWAY		65	-0.326538	-1.08392	0.309735	0.656327	1	2216	tags=18%, list=9%, signal=20%
OSWALD_HEMATOPOIETIC_STEM_CELL_IN_COLLAGEN_GEL_DN	OSWALD_HEMATOPOIETIC_STEM_CELL_IN_COLLAGEN_GEL_DN		230	-0.274117	-1.08299	0.248417	0.658396	1	2469	tags=19%, list=11%, signal=21%
TARTE_PLASMA_CELL_VS_PLASMABLAST_UP	TARTE_PLASMA_CELL_VS_PLASMABLAST_UP		330	-0.263843	-1.08282	0.219232	0.65797	1	3618	tags=22%, list=15%, signal=26%
REACTOME_SIGNALING_BY_RHO_GTPASES	REACTOME_SIGNALING_BY_RHO_GTPASES		109	-0.301566	-1.08267	0.27923	0.657484	1	4992	tags=35%, list=21%, signal=44%
TONKS_TARGETS_OF_RUNX1_RUNX1T1_FUSION_MONOCYTE_DN	TONKS_TARGETS_OF_RUNX1_RUNX1T1_FUSION_MONOCYTE_DN		45	-0.347611	-1.0826	0.314709	0.656725	1	2836	tags=22%, list=12%, signal=25%
REACTOME_NEURONAL_SYSTEM	REACTOME_NEURONAL_SYSTEM		269	-0.269648	-1.08207	0.235147	0.657479	1	4823	tags=30%, list=21%, signal=37%
SENGUPTA_NASOPHARYNGEAL_CARCINOMA_DN	SENGUPTA_NASOPHARYNGEAL_CARCINOMA_DN		260	-0.269886	-1.08174	0.239188	0.657588	1	4392	tags=25%, list=19%, signal=31%
MCGARVEY_SILENCED_BY_METHYLATION_IN_COLON_CANCER	MCGARVEY_SILENCED_BY_METHYLATION_IN_COLON_CANCER		41	-0.354528	-1.08121	0.323594	0.65834	1	1390	tags=15%, list=6%, signal=16%
ROSS_AML_OF_FAB_M7_TYPE	ROSS_AML_OF_FAB_M7_TYPE		67	-0.322671	-1.08096	0.304363	0.658176	1	2139	tags=21%, list=9%, signal=23%
ZWANG_EGF_PERSISTENTLY_DN	ZWANG_EGF_PERSISTENTLY_DN		50	-0.342039	-1.08041	0.32	0.658991	1	2250	tags=20%, list=10%, signal=22%
THEILGAARD_NEUTROPHIL_AT_SKIN_WOUND_UP	THEILGAARD_NEUTROPHIL_AT_SKIN_WOUND_UP		71	-0.320214	-1.08021	0.301411	0.658697	1	2226	tags=18%, list=10%, signal=20%
XU_GH1_EXOGENOUS_TARGETS_UP	XU_GH1_EXOGENOUS_TARGETS_UP		64	-0.325541	-1.08016	0.307579	0.657875	1	5121	tags=34%, list=22%, signal=44%
REACTOME_ASPARAGINE_N_LINKED_GLYCOSYLATION	REACTOME_ASPARAGINE_N_LINKED_GLYCOSYLATION		78	-0.316672	-1.07985	0.299573	0.657912	1	1643	tags=19%, list=7%, signal=21%
ROVERSI_GLIOMA_COPY_NUMBER_DN	ROVERSI_GLIOMA_COPY_NUMBER_DN		50	-0.340573	-1.07955	0.317007	0.657962	1	3677	tags=26%, list=16%, signal=31%
PID_RETINOIC_ACID_PATHWAY	PID_RETINOIC_ACID_PATHWAY		30	-0.380382	-1.07935	0.335673	0.657639	1	4286	tags=33%, list=18%, signal=41%
FRIDMAN_IMMORTALIZATION_DN	FRIDMAN_IMMORTALIZATION_DN		30	-0.378165	-1.07906	0.333767	0.657622	1	3528	tags=23%, list=15%, signal=27%
SCHAEFFER_PROSTATE_DEVELOPMENT_12HR_UP	SCHAEFFER_PROSTATE_DEVELOPMENT_12HR_UP		111	-0.298025	-1.07906	0.29071	0.656661	1	2772	tags=20%, list=12%, signal=22%
WEINMANN_ADAPTATION_TO_HYPOXIA_DN	WEINMANN_ADAPTATION_TO_HYPOXIA_DN		39	-0.356466	-1.07891	0.327263	0.656173	1	1765	tags=21%, list=8%, signal=22%
MCCABE_BOUND_BY_HOXC6	MCCABE_BOUND_BY_HOXC6		337	-0.26265	-1.07824	0.228114	0.657404	1	3931	tags=23%, list=17%, signal=27%
CHEN_HOXA5_TARGETS_9HR_UP	CHEN_HOXA5_TARGETS_9HR_UP		183	-0.27918	-1.07797	0.261941	0.657317	1	5407	tags=36%, list=23%, signal=46%
REACTOME_ACTIVATED_TAK1_MEDIATES_P38_MAPK_ACTIVATION	REACTOME_ACTIVATED_TAK1_MEDIATES_P38_MAPK_ACTIVATION		17	-0.432562	-1.07774	0.355547	0.657089	1	2149	tags=18%, list=9%, signal=19%
CHARAFE_BREAST_CANCER_LUMINAL_VS_BASAL_UP	CHARAFE_BREAST_CANCER_LUMINAL_VS_BASAL_UP		330	-0.261934	-1.07737	0.231509	0.657335	1	2968	tags=22%, list=13%, signal=25%
WANG_TNF_TARGETS	WANG_TNF_TARGETS		24	-0.396623	-1.07731	0.334453	0.656577	1	4236	tags=42%, list=18%, signal=51%
ACEVEDO_LIVER_CANCER_WITH_H3K9ME3_UP	ACEVEDO_LIVER_CANCER_WITH_H3K9ME3_UP		102	-0.302895	-1.07689	0.301763	0.656999	1	3135	tags=17%, list=13%, signal=19%
RAY_TUMORIGENESIS_BY_ERBB2_CDC25A_UP	RAY_TUMORIGENESIS_BY_ERBB2_CDC25A_UP		98	-0.303205	-1.07675	0.295722	0.656498	1	4011	tags=27%, list=17%, signal=32%
TCGA_GLIOBLASTOMA_COPY_NUMBER_DN	TCGA_GLIOBLASTOMA_COPY_NUMBER_DN		29	-0.380079	-1.0765	0.345647	0.656375	1	5635	tags=38%, list=24%, signal=50%
PHONG_TNF_RESPONSE_VIA_P38_PARTIAL	PHONG_TNF_RESPONSE_VIA_P38_PARTIAL		154	-0.284518	-1.0747	0.284539	0.661258	1	3328	tags=23%, list=14%, signal=27%
SHAFFER_IRF4_TARGETS_IN_ACTIVATED_DENDRITIC_CELL	SHAFFER_IRF4_TARGETS_IN_ACTIVATED_DENDRITIC_CELL		60	-0.326772	-1.0746	0.324041	0.660647	1	2836	tags=25%, list=12%, signal=28%
SHI_SPARC_TARGETS_UP	SHI_SPARC_TARGETS_UP		23	-0.400084	-1.07309	0.35702	0.664584	1	3569	tags=35%, list=15%, signal=41%
STEARMAN_TUMOR_FIELD_EFFECT_UP	STEARMAN_TUMOR_FIELD_EFFECT_UP		33	-0.370334	-1.07285	0.341544	0.664392	1	1759	tags=18%, list=8%, signal=20%
HEDENFALK_BREAST_CANCER_BRACX_DN	HEDENFALK_BREAST_CANCER_BRACX_DN		20	-0.410651	-1.07243	0.359491	0.664802	1	4030	tags=45%, list=17%, signal=54%
NIELSEN_SCHWANNOMA_UP	NIELSEN_SCHWANNOMA_UP		16	-0.436661	-1.07236	0.368719	0.664087	1	4581	tags=44%, list=20%, signal=54%
VALK_AML_CLUSTER_16	VALK_AML_CLUSTER_16		22	-0.405291	-1.07132	0.355339	0.666511	1	1172	tags=23%, list=5%, signal=24%
FOSTER_KDM1A_TARGETS_UP	FOSTER_KDM1A_TARGETS_UP		230	-0.270622	-1.07096	0.261792	0.666706	1	2800	tags=16%, list=12%, signal=18%
SHEDDEN_LUNG_CANCER_GOOD_SURVIVAL_A4	SHEDDEN_LUNG_CANCER_GOOD_SURVIVAL_A4		176	-0.279323	-1.0708	0.286811	0.666305	1	4959	tags=33%, list=21%, signal=41%
OLSSON_E2F3_TARGETS_UP	OLSSON_E2F3_TARGETS_UP		24	-0.392815	-1.0704	0.349282	0.666651	1	5387	tags=42%, list=23%, signal=54%
BHAT_ESR1_TARGETS_VIA_AKT1_UP	BHAT_ESR1_TARGETS_VIA_AKT1_UP		260	-0.267127	-1.07004	0.262755	0.66687	1	4437	tags=26%, list=19%, signal=31%
KEGG_HEMATOPOIETIC_CELL_LINEAGE	KEGG_HEMATOPOIETIC_CELL_LINEAGE		67	-0.320874	-1.06953	0.324756	0.66762	1	2769	tags=33%, list=12%, signal=37%
CHANDRAN_METASTASIS_DN	CHANDRAN_METASTASIS_DN		268	-0.265336	-1.06923	0.26136	0.667636	1	3908	tags=25%, list=17%, signal=30%
FIGUEROA_AML_METHYLATION_CLUSTER_7_UP	FIGUEROA_AML_METHYLATION_CLUSTER_7_UP		95	-0.303018	-1.06863	0.317474	0.66865	1	2296	tags=21%, list=10%, signal=23%
PEDRIOLI_MIR31_TARGETS_UP	PEDRIOLI_MIR31_TARGETS_UP		160	-0.281448	-1.06744	0.29305	0.671543	1	3925	tags=22%, list=17%, signal=26%
ASTON_MAJOR_DEPRESSIVE_DISORDER_DN	ASTON_MAJOR_DEPRESSIVE_DISORDER_DN		149	-0.284106	-1.06727	0.295931	0.67118	1	4274	tags=26%, list=18%, signal=31%
BROWNE_HCMV_INFECTION_30MIN_DN	BROWNE_HCMV_INFECTION_30MIN_DN		130	-0.287929	-1.06711	0.304921	0.670722	1	3217	tags=20%, list=14%, signal=23%
GEORGANTAS_HSC_MARKERS	GEORGANTAS_HSC_MARKERS		60	-0.325783	-1.0671	0.335796	0.669803	1	2287	tags=22%, list=10%, signal=24%
RICKMAN_HEAD_AND_NECK_CANCER_B	RICKMAN_HEAD_AND_NECK_CANCER_B		37	-0.357191	-1.06634	0.34041	0.671377	1	7701	tags=46%, list=33%, signal=68%
TIAN_TNF_SIGNALING_NOT_VIA_NFKB	TIAN_TNF_SIGNALING_NOT_VIA_NFKB		21	-0.403836	-1.06524	0.35709	0.674015	1	2768	tags=29%, list=12%, signal=32%
BRUINS_UVC_RESPONSE_EARLY_LATE	BRUINS_UVC_RESPONSE_EARLY_LATE		281	-0.263628	-1.06472	0.275673	0.674753	1	5216	tags=33%, list=22%, signal=42%
HSIAO_LIVER_SPECIFIC_GENES	HSIAO_LIVER_SPECIFIC_GENES		208	-0.272084	-1.0637	0.292716	0.677157	1	5450	tags=28%, list=23%, signal=36%
GAUSSMANN_MLL_AF4_FUSION_TARGETS_B_UP	GAUSSMANN_MLL_AF4_FUSION_TARGETS_B_UP		24	-0.392544	-1.06351	0.361917	0.676826	1	2	tags=4%, list=0%, signal=4%
RHEIN_ALL_GLUCOCORTICOID_THERAPY_UP	RHEIN_ALL_GLUCOCORTICOID_THERAPY_UP		69	-0.317768	-1.06336	0.332115	0.676367	1	4150	tags=26%, list=18%, signal=32%
RAMALHO_STEMNESS_DN	RAMALHO_STEMNESS_DN		68	-0.318707	-1.06329	0.330864	0.675671	1	355	tags=13%, list=2%, signal=13%
VALK_AML_CLUSTER_4	VALK_AML_CLUSTER_4		24	-0.392	-1.06258	0.358828	0.677017	1	2618	tags=29%, list=11%, signal=33%
BROWNE_HCMV_INFECTION_24HR_DN	BROWNE_HCMV_INFECTION_24HR_DN		135	-0.286538	-1.06238	0.311119	0.676758	1	3240	tags=23%, list=14%, signal=26%
OHGUCHI_LIVER_HNF4A_TARGETS_UP	OHGUCHI_LIVER_HNF4A_TARGETS_UP		41	-0.347292	-1.06224	0.35033	0.676263	1	1253	tags=17%, list=5%, signal=18%
BROWNE_HCMV_INFECTION_10HR_DN	BROWNE_HCMV_INFECTION_10HR_DN		50	-0.334661	-1.06171	0.348418	0.67702	1	2425	tags=30%, list=10%, signal=33%
BIOCARTA_TPO_PATHWAY	BIOCARTA_TPO_PATHWAY		23	-0.3938	-1.06153	0.368774	0.676675	1	2391	tags=22%, list=10%, signal=24%
GYORFFY_DOXORUBICIN_RESISTANCE	GYORFFY_DOXORUBICIN_RESISTANCE		45	-0.341138	-1.06152	0.346069	0.675774	1	3238	tags=27%, list=14%, signal=31%
BAKER_HEMATOPOIESIS_STAT3_TARGETS	BAKER_HEMATOPOIESIS_STAT3_TARGETS		16	-0.432911	-1.06145	0.370821	0.675079	1	1303	tags=31%, list=6%, signal=33%
REACTOME_PPARA_ACTIVATES_GENE_EXPRESSION	REACTOME_PPARA_ACTIVATES_GENE_EXPRESSION		102	-0.296945	-1.06083	0.321512	0.676153	1	4382	tags=28%, list=19%, signal=35%
CEBALLOS_TARGETS_OF_TP53_AND_MYC_DN	CEBALLOS_TARGETS_OF_TP53_AND_MYC_DN		35	-0.360079	-1.0604	0.352224	0.676605	1	1683	tags=17%, list=7%, signal=18%
MORI_IMMATURE_B_LYMPHOCYTE_UP	MORI_IMMATURE_B_LYMPHOCYTE_UP		49	-0.338308	-1.06039	0.357667	0.675718	1	3741	tags=31%, list=16%, signal=36%
WORSCHECH_TUMOR_REJECTION_UP	WORSCHECH_TUMOR_REJECTION_UP		52	-0.333038	-1.06036	0.353528	0.674874	1	3384	tags=29%, list=14%, signal=34%
RUTELLA_RESPONSE_TO_HGF_DN	RUTELLA_RESPONSE_TO_HGF_DN		210	-0.270648	-1.06003	0.293098	0.675014	1	3857	tags=30%, list=16%, signal=36%
LEE_LIVER_CANCER_ACOX1_UP	LEE_LIVER_CANCER_ACOX1_UP		60	-0.325119	-1.0594	0.346667	0.676167	1	2399	tags=18%, list=10%, signal=20%
TONKS_TARGETS_OF_RUNX1_RUNX1T1_FUSION_HSC_UP	TONKS_TARGETS_OF_RUNX1_RUNX1T1_FUSION_HSC_UP		170	-0.27721	-1.05934	0.315276	0.675456	1	3528	tags=25%, list=15%, signal=30%
PLASARI_TGFB1_SIGNALING_VIA_NFIC_1HR_UP	PLASARI_TGFB1_SIGNALING_VIA_NFIC_1HR_UP		31	-0.367725	-1.05928	0.354951	0.674717	1	2187	tags=26%, list=9%, signal=28%
KANG_IMMORTALIZED_BY_TERT_DN	KANG_IMMORTALIZED_BY_TERT_DN		96	-0.298904	-1.05909	0.331088	0.674411	1	4101	tags=27%, list=18%, signal=33%
MATZUK_MEIOTIC_AND_DNA_REPAIR	MATZUK_MEIOTIC_AND_DNA_REPAIR		39	-0.350683	-1.05907	0.352197	0.673542	1	5863	tags=38%, list=25%, signal=51%
HINATA_NFKB_TARGETS_KERATINOCYTE_UP	HINATA_NFKB_TARGETS_KERATINOCYTE_UP		87	-0.305426	-1.05894	0.332566	0.673071	1	5713	tags=36%, list=24%, signal=47%
SIG_BCR_SIGNALING_PATHWAY	SIG_BCR_SIGNALING_PATHWAY		46	-0.339199	-1.05845	0.358025	0.673734	1	3253	tags=24%, list=14%, signal=28%
MYLLYKANGAS_AMPLIFICATION_HOT_SPOT_17	MYLLYKANGAS_AMPLIFICATION_HOT_SPOT_17		17	-0.425627	-1.05806	0.376264	0.674083	1	3586	tags=41%, list=15%, signal=49%
KYNG_DNA_DAMAGE_BY_GAMMA_RADIATION	KYNG_DNA_DAMAGE_BY_GAMMA_RADIATION		75	-0.31123	-1.05741	0.337163	0.675268	1	2558	tags=19%, list=11%, signal=21%
LOPES_METHYLATED_IN_COLON_CANCER_UP	LOPES_METHYLATED_IN_COLON_CANCER_UP		24	-0.388045	-1.05709	0.370246	0.675406	1	864	tags=8%, list=4%, signal=9%
HUMMERICH_MALIGNANT_SKIN_TUMOR_DN	HUMMERICH_MALIGNANT_SKIN_TUMOR_DN		15	-0.432157	-1.05679	0.379071	0.675458	1	2752	tags=40%, list=12%, signal=45%
WU_HBX_TARGETS_3_UP	WU_HBX_TARGETS_3_UP		18	-0.416059	-1.05678	0.373271	0.6746	1	2558	tags=17%, list=11%, signal=19%
BANDRES_RESPONSE_TO_CARMUSTIN_MGMT_24HR_DN	BANDRES_RESPONSE_TO_CARMUSTIN_MGMT_24HR_DN		33	-0.363333	-1.05649	0.361471	0.674588	1	3423	tags=24%, list=15%, signal=28%
SHEN_SMARCA2_TARGETS_DN	SHEN_SMARCA2_TARGETS_DN		273	-0.261967	-1.05611	0.293802	0.674933	1	3737	tags=21%, list=16%, signal=24%
ELVIDGE_HIF1A_AND_HIF2A_TARGETS_DN	ELVIDGE_HIF1A_AND_HIF2A_TARGETS_DN		95	-0.299364	-1.05587	0.337771	0.674793	1	3066	tags=25%, list=13%, signal=29%
BROWNE_HCMV_INFECTION_4HR_DN	BROWNE_HCMV_INFECTION_4HR_DN		223	-0.267716	-1.0558	0.298372	0.674125	1	3218	tags=20%, list=14%, signal=23%
NAKAYAMA_SOFT_TISSUE_TUMORS_PCA1_DN	NAKAYAMA_SOFT_TISSUE_TUMORS_PCA1_DN		73	-0.312375	-1.05549	0.350136	0.674211	1	3019	tags=19%, list=13%, signal=22%
[truncated: 695 more rows]
